# Supplementary material for: KIS counteracts PTBP2 and regulates alternative exon usage in neurons
Source: eLife journal article supplement (doi:10.7554/elife.96048), 2024-04-10
Supplement: supp [file elife-96048-supp-v1.zip]

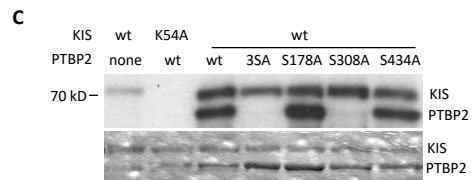

<sup>32</sup>P autoradiography

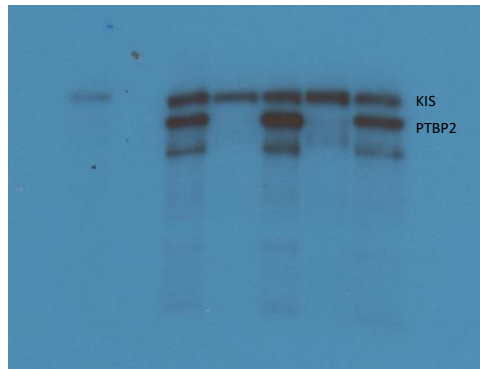

Coomassie Blue

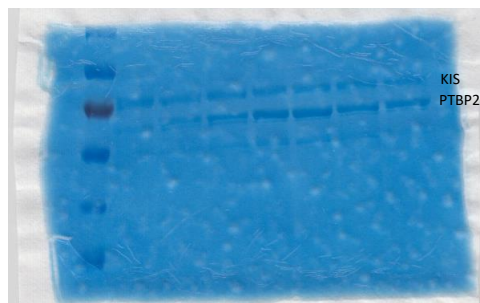

Figure 2-figure supplement 1-source data 1. KIS in vitro kinase assays
