# Supplementary material for: KIS counteracts PTBP2 and regulates alternative exon usage in neurons
Source: eLife journal article supplement (doi:10.7554/elife.96048), 2024-04-10

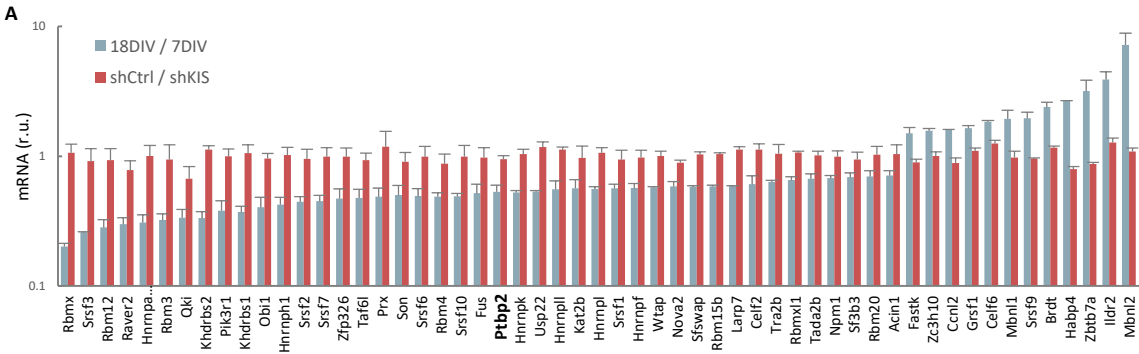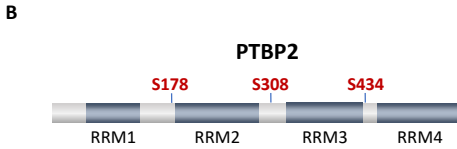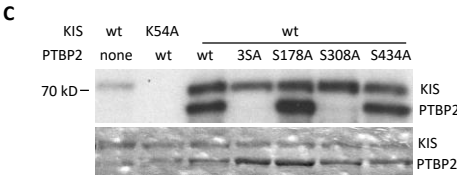

**D**

|       |     |                                                                  |     |
|-------|-----|------------------------------------------------------------------|-----|
| PTBP2 | 1   | MDGIVTEVAVGVKRGSDLLSGSVLSPNSNMSSMVVTANGNDSKKFKGEDKMDGAPSRV       | 60  |
| PTBP1 | 1   | MDGIV++AVG-KRGSDLL-S-V+P-S+...ANGNDSKKFKG++-G-PSRV               | 60  |
| PTBP2 | 61  | LRHKLPGEVETEVIALGLPFGKVTNIMLKGKQAFLELATEAAITMVNYSAVTPH           | 120 |
| PTBP1 | 61  | LRHKLPGIDVTEGEVISLGLPFGKVTNIMLKGKQAFIEMNTEEAANTMVNYTSVTFV        | 120 |
| PTBP2 | 121 | LRNQPPIYIQSNHKLKTDNTLNQRAQAVLQA-VTAQTAN--TPLSGTTVSESAVTPAQ       | 177 |
| PTBP1 | 121 | LRNQPPIYIQSNHKLKTDSSPNQARAQALQAVNSVQSGNLALAASAAVDAGMAMAGQ        | 180 |
| PTBP2 | 178 | SPVLRIRIINDMYYPVTLDLVHQIFSKFGVLKIIITFTKNNQFQALLQYQDPVNAQAQAKLA   | 237 |
| PTBP1 | 181 | SPVLRIRIIVENLFYPVTLDLVHQIFSKFGVLKIIITFTKNNQFQALLQYADVPVSAQHAQKLS | 240 |
| PTBP2 | 238 | LDGQNIYNACCTLRIDFSKLVNLNVKYNNDKSRDYTRPDLPSGDGQPALDPAIAAFAKE      | 297 |
| PTBP1 | 241 | LDGQNIYNACCTLRIDFSKLVNLNVKYNNDKSRDYTRPDLPSGDGQPALDPAIAAFAKE      | 300 |
| PTBP2 | 298 | TSLLAPE--GALSP--LAIPNAAAAAAGRVGMP-----GVSAG                      | 335 |
| PTBP1 | 301 | GIISAPYAGAGFPPTFAIPQAAGLVNPNVHGALAPLAIPSAAGRAIIPGLAGA            | 360 |
| PTBP2 | 336 | GNTVLLVSNLNEEMVTPQSLFTLFGVIGDVQVRVKILYNKKDSALIQADGNQSGLAMNHL     | 395 |
| PTBP1 | 361 | GNTVLLVSNLNEEMVTPQSLFTLFGVIGDVQVRVKILYNKKDSALIQADGNQSGLAMNHL     | 420 |
| PTBP2 | 396 | NGQRMKGKIRIVTLKSHQTVLPREGLDQGLTKDFGNSPLHRFKKPGSKNFQNIFFPPSA      | 455 |
| PTBP1 | 421 | NGHKLHGKPIRITLSKHQVQLPREGQEDQGLTKDYGNSSPLHRFKKPGSKNFQNIFFPPSA    | 480 |
| PTBP2 | 456 | TLHLSNIPPSVAEEDLRLTFANTGVTGKFAKFFQ-DHKMALLQMATVEEAQALIDLHNY      | 514 |
| PTBP1 | 481 | TLHLSNIPPSVAEEDLRLTFANTGVTGKFAKFFQ-DHKMALLQMATVEEAQALIDLHNY      | 540 |
| PTBP2 | 515 | NLGENHHLRVFSKSTI                                                 | 531 |
| PTBP1 | 541 | DLGENHHLRVFSKSTI                                                 | 557 |

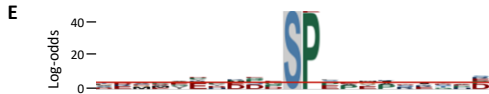

Supplement: supp [file elife-96048-supp-v1.zip]
