# Supplementary material for: KIS counteracts PTBP2 and regulates alternative exon usage in neurons
Source: eLife. 2024 Apr 10;13:e96048. doi: 10.7554/eLife.96048 (PMC11045219; doi:10.7554/eLife.96048)
Supplement: Supplementary file 1. [file elife-96048-supp1.xlsx]

## Sheet: Volcano plot
Dataset EV2
Gene	Description	ExonID	GeneID	Chr	Start	End	Strand	Length	log2FC	-log(p)
Camsap1	calmodulin regulated spectrin-associated protein 1 [Source:MGI Symbol;Acc:MGI:3036242]	chr2:25934220-25934614	ENSMUSG00000026933.17	chr2	25934220	25934614	-	395	2.32427	2.9006
Camsap1	calmodulin regulated spectrin-associated protein 1 [Source:MGI Symbol;Acc:MGI:3036242]	chr2:25934220-25934335	ENSMUSG00000026933.17	chr2	25934220	25934335	-	116	2.12798	2.7993
Ncam1	neural cell adhesion molecule 1 [Source:MGI Symbol;Acc:MGI:97281]	chr9:49531276-49531973	ENSMUSG00000039542.16	chr9	49531276	49531973	-	698	1.97419	2.84974
Cox7a2l	cytochrome c oxidase subunit 7A2 like [Source:MGI Symbol;Acc:MGI:106015]	chr17:83514204-83514330	ENSMUSG00000024248.14	chr17	83514204	83514330	-	127	1.50559	2.13345
Pias1	protein inhibitor of activated STAT 1 [Source:MGI Symbol;Acc:MGI:1913125]	chr9:62922907-62923328	ENSMUSG00000032405.10	chr9	62922907	62923328	-	422	1.32365	2.90189
Lrrc61	leucine rich repeat containing 61 [Source:MGI Symbol;Acc:MGI:2652848]	chr6:48554799-48554982	ENSMUSG00000073096.11	chr6	48554799	48554982	+	184	1.28445	2.31541
Lrrc61	leucine rich repeat containing 61 [Source:MGI Symbol;Acc:MGI:2652848]	chr6:48554796-48554982	ENSMUSG00000073096.11	chr6	48554796	48554982	+	187	1.28445	2.31541
Chst15	carbohydrate sulfotransferase 15 [Source:MGI Symbol;Acc:MGI:1924840]	chr7:132266657-132266803	ENSMUSG00000030930.14	chr7	132266657	132266803	-	147	1.25472	3.12496
Cox7c	cytochrome c oxidase subunit 7C [Source:MGI Symbol;Acc:MGI:103226]	chr13:86044821-86044908	ENSMUSG00000017778.14	chr13	86044821	86044908	-	88	1.21532	2.29844
Cox7c	cytochrome c oxidase subunit 7C [Source:MGI Symbol;Acc:MGI:103226]	chr13:86044816-86044908	ENSMUSG00000017778.14	chr13	86044816	86044908	-	93	1.21532	2.29844
Cers1	ceramide synthase 1 [Source:MGI Symbol;Acc:MGI:2136690]	chr8:70318350-70318793	ENSMUSG00000087408.10	chr8	70318350	70318793	+	444	1.19124	1.50645
Ddx39b	DEAD box helicase 39b [Source:MGI Symbol;Acc:MGI:99240]	chr17:35241778-35241852	ENSMUSG00000019432.15	chr17	35241778	35241852	+	75	1.17322	1.86731
Cln6	ceroid-lipofuscinosis, neuronal 6 [Source:MGI Symbol;Acc:MGI:2159324]	chr9:62844570-62844684	ENSMUSG00000032245.12	chr9	62844570	62844684	+	115	1.17317	2.28672
Mrpl22	mitochondrial ribosomal protein L22 [Source:MGI Symbol;Acc:MGI:1333794]	chr11:58171689-58171842	ENSMUSG00000020514.8	chr11	58171689	58171842	+	154	1.1612	2.09814
Ddx39b	DEAD box helicase 39b [Source:MGI Symbol;Acc:MGI:99240]	chr17:35241805-35241852	ENSMUSG00000019432.15	chr17	35241805	35241852	+	48	1.14737	1.84836
Trpm2	transient receptor potential cation channel, subfamily M, member 2 [Source:MGI Symbol;Acc:MGI:1351901]	chr10:77930536-77931779	ENSMUSG00000009292.18	chr10	77930536	77931779	-	1244	1.12573	2.24115
Drd2	dopamine receptor D2 [Source:MGI Symbol;Acc:MGI:94924]	chr9:49399736-49399845	ENSMUSG00000032259.8	chr9	49399736	49399845	+	110	1.12107	2.5632
Kxd1	KxDL motif containing 1 [Source:MGI Symbol;Acc:MGI:1922870]	chr8:70514690-70514748	ENSMUSG00000055553.16	chr8	70514690	70514748	-	59	1.10142	3.02343
Mpped1	metallophosphoesterase domain containing 1 [Source:MGI Symbol;Acc:MGI:106316]	chr15:83779982-83780107	ENSMUSG00000041708.12	chr15	83779982	83780107	+	126	1.09635	1.57562
Mxi1	MAX interactor 1, dimerization protein [Source:MGI Symbol;Acc:MGI:97245]	chr19:53329696-53329795	ENSMUSG00000025025.14	chr19	53329696	53329795	+	100	1.08293	3.10653
Hat1	histone aminotransferase 1 [Source:MGI Symbol;Acc:MGI:96013]	chr2:71389903-71389998	ENSMUSG00000027018.11	chr2	71389903	71389998	+	96	1.07435	2.53702
Inpp5k	inositol polyphosphate 5-phosphatase K [Source:MGI Symbol;Acc:MGI:1194899]	chr11:75633069-75633176	ENSMUSG00000006127.9	chr11	75633069	75633176	+	108	1.03771	2.49934
Vdac1	voltage-dependent anion channel 1 [Source:MGI Symbol;Acc:MGI:106919]	chr11:52374100-52374368	ENSMUSG00000020402.11	chr11	52374100	52374368	+	269	1.0288	2.51201
Vdac1	voltage-dependent anion channel 1 [Source:MGI Symbol;Acc:MGI:106919]	chr11:52374299-52374368	ENSMUSG00000020402.11	chr11	52374299	52374368	+	70	1.02691	2.57086
Vdac1	voltage-dependent anion channel 1 [Source:MGI Symbol;Acc:MGI:106919]	chr11:52374263-52374368	ENSMUSG00000020402.11	chr11	52374263	52374368	+	106	1.02317	2.59324
Ptges3l	prostaglandin E synthase 3 like [Source:MGI Symbol;Acc:MGI:1916146]	chr11:101421832-101421954	ENSMUSG00000097487.7	chr11	101421832	101421954	-	123	1.01865	2.76858
Itpa	inosine triphosphatase (nucleoside triphosphate pyrophosphatase) [Source:MGI Symbol;Acc:MGI:96622]	chr2:130671401-130671620	ENSMUSG00000074797.11	chr2	130671401	130671620	+	220	1.01781	2.21377
Inpp5k	inositol polyphosphate 5-phosphatase K [Source:MGI Symbol;Acc:MGI:1194899]	chr11:75633104-75633176	ENSMUSG00000006127.9	chr11	75633104	75633176	+	73	1.01123	2.477
Eef1g	eukaryotic translation elongation factor 1 gamma [Source:MGI Symbol;Acc:MGI:1914410]	chr19:8977585-8977709	ENSMUSG00000071644.10	chr19	8977585	8977709	+	125	1.0035	3.21241
Atr	ataxia telangiectasia and Rad3 related [Source:MGI Symbol;Acc:MGI:108028]	chr9:95916430-95919131	ENSMUSG00000032409.15	chr9	95916430	95919131	+	2702	0.984412	2.01916
Ubl5	ubiquitin-like 5 [Source:MGI Symbol;Acc:MGI:1913427]	chr9:20645622-20645906	ENSMUSG00000084786.9	chr9	20645622	20645906	+	285	0.968762	2.21476
Cntrob	centrobin, centrosomal BRCA2 interacting protein [Source:MGI Symbol;Acc:MGI:2443290]	chr11:69321356-69321419	ENSMUSG00000032782.19	chr11	69321356	69321419	-	64	0.966915	3.28275
Polm	polymerase (DNA directed), mu [Source:MGI Symbol;Acc:MGI:1860191]	chr11:5835416-5835586	ENSMUSG00000020474.11	chr11	5835416	5835586	-	171	0.946626	2.58255
Crip2	cysteine rich protein 2 [Source:MGI Symbol;Acc:MGI:1915587]	chr12:113140572-113140778	ENSMUSG00000006356.10	chr12	113140572	113140778	+	207	0.946225	1.11789
Tafazzin	tafazzin, phospholipid-lysophospholipid transacylase [Source:MGI Symbol;Acc:MGI:109626]	chrX:74282718-74282915	ENSMUSG00000009995.17	chrX	74282718	74282915	+	198	0.936031	2.51718
Nfe2l1	nuclear factor, erythroid derived 2,-like 1 [Source:MGI Symbol;Acc:MGI:99421]	chr11:96822409-96822725	ENSMUSG00000038615.17	chr11	96822409	96822725	-	317	0.929843	1.82803
Tmem160	transmembrane protein 160 [Source:MGI Symbol;Acc:MGI:1916344]	chr7:16452779-16453170	ENSMUSG00000019158.9	chr7	16452779	16453170	+	392	0.92591	2.24549
Slc3a2	solute carrier family 3 (activators of dibasic and neutral amino acid transport), member 2 [Source:MGI Symbol;Acc:MGI:96955]	chr19:8713961-8714096	ENSMUSG00000010095.13	chr19	8713961	8714096	-	136	0.924622	1.82855
Ripor2	RHO family interacting cell polarization regulator 2 [Source:MGI Symbol;Acc:MGI:2444879]	chr13:24687800-24689509	ENSMUSG00000036006.20	chr13	24687800	24689509	+	1710	0.913285	2.05826
Agtpbp1	ATP/GTP binding protein 1 [Source:MGI Symbol;Acc:MGI:2159437]	chr13:59580176-59583230	ENSMUSG00000021557.15	chr13	59580176	59583230	-	3055	0.911375	1.72027
Sgsm3	small G protein signaling modulator 3 [Source:MGI Symbol;Acc:MGI:1916329]	chr15:81011462-81011522	ENSMUSG00000042303.19	chr15	81011462	81011522	+	61	0.90129	2.93006
Ddx39b	DEAD box helicase 39b [Source:MGI Symbol;Acc:MGI:99240]	chr17:35241746-35241852	ENSMUSG00000019432.15	chr17	35241746	35241852	+	107	0.875474	2.03118
Tusc2	tumor suppressor 2, mitochondrial calcium regulator [Source:MGI Symbol;Acc:MGI:1931086]	chr9:107563829-107563948	ENSMUSG00000010054.4	chr9	107563829	107563948	+	120	0.871541	1.2956
Atf2	activating transcription factor 2 [Source:MGI Symbol;Acc:MGI:109349]	chr2:73844869-73845553	ENSMUSG00000027104.18	chr2	73844869	73845553	-	685	0.850447	1.75112
Lrfn1	leucine rich repeat and fibronectin type III domain containing 1 [Source:MGI Symbol;Acc:MGI:2136810]	chr7:28452148-28452336	ENSMUSG00000030600.15	chr7	28452148	28452336	+	189	0.850303	1.53865
Ppa2	pyrophosphatase (inorganic) 2 [Source:MGI Symbol;Acc:MGI:1922026]	chr3:133321468-133326567	ENSMUSG00000028013.16	chr3	133321468	133326567	+	5100	0.846595	1.26839
Stxbp1	syntaxin binding protein 1 [Source:MGI Symbol;Acc:MGI:107363]	chr2:32823536-32823583	ENSMUSG00000026797.16	chr2	32823536	32823583	-	48	0.846199	1.97748
Stxbp1	syntaxin binding protein 1 [Source:MGI Symbol;Acc:MGI:107363]	chr2:32823536-32823585	ENSMUSG00000026797.16	chr2	32823536	32823585	-	50	0.846199	1.97748
Mecp2	methyl CpG binding protein 2 [Source:MGI Symbol;Acc:MGI:99918]	chrX:74081035-74085597	ENSMUSG00000031393.16	chrX	74081035	74085597	-	4563	0.846039	1.86413
Impact	impact, RWD domain protein [Source:MGI Symbol;Acc:MGI:1098233]	chr18:12972272-12972372	ENSMUSG00000024423.6	chr18	12972272	12972372	+	101	0.844626	2.77335
Vps8	VPS8 CORVET complex subunit [Source:MGI Symbol;Acc:MGI:2146407]	chr16:21448349-21448407	ENSMUSG00000033653.18	chr16	21448349	21448407	+	59	0.83057	3.20817
Vps8	VPS8 CORVET complex subunit [Source:MGI Symbol;Acc:MGI:2146407]	chr16:21448349-21448403	ENSMUSG00000033653.18	chr16	21448349	21448403	+	55	0.83057	3.20817
Kxd1	KxDL motif containing 1 [Source:MGI Symbol;Acc:MGI:1922870]	chr8:70514595-70514748	ENSMUSG00000055553.16	chr8	70514595	70514748	-	154	0.827395	2.10265
Gprasp1	G protein-coupled receptor associated sorting protein 1 [Source:MGI Symbol;Acc:MGI:1917418]	chrX:135761729-135761990	ENSMUSG00000043384.15	chrX	135761729	135761990	+	262	0.82444	1.80064
Mboat2	membrane bound O-acyltransferase domain containing 2 [Source:MGI Symbol;Acc:MGI:1914466]	chr12:24924199-24926865	ENSMUSG00000020646.17	chr12	24924199	24926865	+	2667	0.822659	1.42475
Csde1	cold shock domain containing E1, RNA binding [Source:MGI Symbol;Acc:MGI:92356]	chr3:103029095-103030897	ENSMUSG00000068823.10	chr3	103029095	103030897	+	1803	0.822194	2.36601
Mob4	MOB family member 4, phocein [Source:MGI Symbol;Acc:MGI:104899]	chr1:55131320-55131625	ENSMUSG00000025979.13	chr1	55131320	55131625	+	306	0.815868	2.44838
Serpine2	serine (or cysteine) peptidase inhibitor, clade E, member 2 [Source:MGI Symbol;Acc:MGI:101780]	chr1:79858511-79858696	ENSMUSG00000026249.10	chr1	79858511	79858696	-	186	0.813693	1.95213
DPCD	deleted in primary ciliary dyskinesia [Source:NCBI gene (formerly Entrezgene);Acc:226162]	chr19:45575464-45575543	ENSMUSG00000041035.9	chr19	45575464	45575543	+	80	0.81145	1.95448
Ogfod3	2-oxoglutarate and iron-dependent oxygenase domain containing 3 [Source:MGI Symbol;Acc:MGI:1913429]	chr11:121183411-121183534	ENSMUSG00000025169.6	chr11	121183411	121183534	-	124	0.808905	3.03458
Cdh8	cadherin 8 [Source:MGI Symbol;Acc:MGI:107434]	chr8:99024471-99024957	ENSMUSG00000036510.17	chr8	99024471	99024957	-	487	0.799658	2.15358
Septin9	septin 9 [Source:MGI Symbol;Acc:MGI:1858222]	chr11:117266246-117266595	ENSMUSG00000059248.13	chr11	117266246	117266595	+	350	0.786221	1.79736
Hira	histone cell cycle regulator [Source:MGI Symbol;Acc:MGI:99430]	chr16:18922317-18922387	ENSMUSG00000022702.16	chr16	18922317	18922387	+	71	0.78531	2.28718
Eno1	enolase 1, alpha non-neuron [Source:MGI Symbol;Acc:MGI:95393]	chr4:150244005-150244074	ENSMUSG00000063524.13	chr4	150244005	150244074	+	70	0.773426	2.76609
St3gal5	ST3 beta-galactoside alpha-2,3-sialyltransferase 5 [Source:MGI Symbol;Acc:MGI:1339963]	chr6:72097592-72097782	ENSMUSG00000056091.12	chr6	72097592	72097782	+	191	0.769722	3.03101
Sgsm3	small G protein signaling modulator 3 [Source:MGI Symbol;Acc:MGI:1916329]	chr15:81011462-81011635	ENSMUSG00000042303.19	chr15	81011462	81011635	+	174	0.763063	2.37082
Ociad1	OCIA domain containing 1 [Source:MGI Symbol;Acc:MGI:1915345]	chr5:73293053-73293482	ENSMUSG00000029152.13	chr5	73293053	73293482	+	430	0.761922	1.56457
R3hdm2	R3H domain containing 2 [Source:MGI Symbol;Acc:MGI:1919000]	chr10:127390311-127390427	ENSMUSG00000025404.15	chr10	127390311	127390427	+	117	0.757249	1.55697
Serpine2	serine (or cysteine) peptidase inhibitor, clade E, member 2 [Source:MGI Symbol;Acc:MGI:101780]	chr1:79857507-79858635	ENSMUSG00000026249.10	chr1	79857507	79858635	-	1129	0.756339	1.72485
Tm7sf2	transmembrane 7 superfamily member 2 [Source:MGI Symbol;Acc:MGI:1920416]	chr19:6066579-6066693	ENSMUSG00000024799.16	chr19	6066579	6066693	-	115	0.75367	2.4527
Mtf1	metal response element binding transcription factor 1 [Source:MGI Symbol;Acc:MGI:101786]	chr4:124842528-124842591	ENSMUSG00000028890.13	chr4	124842528	124842591	+	64	0.753644	2.34304
Slc25a5	solute carrier family 25 (mitochondrial carrier, adenine nucleotide translocator), member 5 [Source:MGI Symbol;Acc:MGI:1353496]	chrX:36795654-36795841	ENSMUSG00000016319.3	chrX	36795654	36795841	+	188	0.750953	2.06174
Hmgb2	high mobility group box 2 [Source:MGI Symbol;Acc:MGI:96157]	chr8:57513062-57513207	ENSMUSG00000054717.7	chr8	57513062	57513207	+	146	0.74285	3.18214
Hmgb2	high mobility group box 2 [Source:MGI Symbol;Acc:MGI:96157]	chr8:57513062-57513209	ENSMUSG00000054717.7	chr8	57513062	57513209	+	148	0.74285	3.18214
Alg2	asparagine-linked glycosylation 2 (alpha-1,3-mannosyltransferase) [Source:MGI Symbol;Acc:MGI:1914731]	chr4:47465067-47465418	ENSMUSG00000039740.6	chr4	47465067	47465418	-	352	0.738461	2.28756
Wdr89	WD repeat domain 89 [Source:MGI Symbol;Acc:MGI:1919588]	chr12:75631397-75633508	ENSMUSG00000045690.8	chr12	75631397	75633508	-	2112	0.734262	1.2693
Cse1l	chromosome segregation 1-like (S. cerevisiae) [Source:MGI Symbol;Acc:MGI:1339951]	chr2:166940833-166941315	ENSMUSG00000002718.14	chr2	166940833	166941315	+	483	0.733433	2.27503
Gabra4	gamma-aminobutyric acid (GABA) A receptor, subunit alpha 4 [Source:MGI Symbol;Acc:MGI:95616]	chr5:71657724-71657875	ENSMUSG00000029211.11	chr5	71657724	71657875	-	152	0.72546	3.43112
Srsf7	serine and arginine-rich splicing factor 7 [Source:MGI Symbol;Acc:MGI:1926232]	chr17:80206567-80206857	ENSMUSG00000024097.11	chr17	80206567	80206857	-	291	0.723492	1.59284
Fus	fused in sarcoma [Source:MGI Symbol;Acc:MGI:1353633]	chr7:127983079-127985701	ENSMUSG00000030795.18	chr7	127983079	127985701	+	2623	0.722738	1.93273
Gnpnat1	glucosamine-phosphate N-acetyltransferase 1 [Source:MGI Symbol;Acc:MGI:1858963]	chr14:45380937-45381016	ENSMUSG00000037722.8	chr14	45380937	45381016	-	80	0.716311	2.88641
Ywhaq	tyrosine 3-monooxygenase/tryptophan 5-monooxygenase activation protein theta [Source:MGI Symbol;Acc:MGI:891963]	chr12:21416798-21417131	ENSMUSG00000076432.13	chr12	21416798	21417131	-	334	0.702494	2.10198
Ywhaq	tyrosine 3-monooxygenase/tryptophan 5-monooxygenase activation protein theta [Source:MGI Symbol;Acc:MGI:891963]	chr12:21416798-21417130	ENSMUSG00000076432.13	chr12	21416798	21417130	-	333	0.702494	2.10198
Ostc	oligosaccharyltransferase complex subunit (non-catalytic) [Source:MGI Symbol;Acc:MGI:1913607]	chr3:130707697-130709416	ENSMUSG00000041084.8	chr3	130707697	130709416	-	1720	0.702251	1.85354
Tmem18	transmembrane protein 18 [Source:MGI Symbol;Acc:MGI:2387176]	chr12:30587200-30587254	ENSMUSG00000043061.10	chr12	30587200	30587254	+	55	0.698374	2.88424
Slc9a8	solute carrier family 9 (sodium/hydrogen exchanger), member 8 [Source:MGI Symbol;Acc:MGI:1924281]	chr2:167451207-167451350	ENSMUSG00000039463.14	chr2	167451207	167451350	+	144	0.697226	2.90963
Rangap1	RAN GTPase activating protein 1 [Source:MGI Symbol;Acc:MGI:103071]	chr15:81706401-81706503	ENSMUSG00000022391.16	chr15	81706401	81706503	-	103	0.693838	1.35983
Pla2g4e	phospholipase A2, group IVE [Source:MGI Symbol;Acc:MGI:1919144]	chr2:120186347-120187238	ENSMUSG00000050211.14	chr2	120186347	120187238	-	892	0.69301	2.26272
Lck	lymphocyte protein tyrosine kinase [Source:MGI Symbol;Acc:MGI:96756]	chr4:129551717-129551870	ENSMUSG00000000409.14	chr4	129551717	129551870	-	154	0.689442	2.95808
Arap2	ArfGAP with RhoGAP domain, ankyrin repeat and PH domain 2 [Source:MGI Symbol;Acc:MGI:2684416]	chr5:62611704-62612374	ENSMUSG00000037999.13	chr5	62611704	62612374	-	671	0.682152	2.36137
Tsg101	tumor susceptibility gene 101 [Source:MGI Symbol;Acc:MGI:106581]	chr7:46903522-46903588	ENSMUSG00000014402.15	chr7	46903522	46903588	-	67	0.680401	2.03217
H3f3a	H3.3 histone A [Source:MGI Symbol;Acc:MGI:1097686]	chr1:180803131-180803205	ENSMUSG00000060743.12	chr1	180803131	180803205	-	75	0.678859	3.16691
Scnm1	sodium channel modifier 1 [Source:MGI Symbol;Acc:MGI:1341284]	chr3:95130164-95130288	ENSMUSG00000092607.9	chr3	95130164	95130288	-	125	0.676637	2.71293
Cct3	chaperonin containing Tcp1, subunit 3 (gamma) [Source:MGI Symbol;Acc:MGI:104708]	chr3:88297117-88298947	ENSMUSG00000001416.13	chr3	88297117	88298947	+	1831	0.673601	0.998736
Amfr	autocrine motility factor receptor [Source:MGI Symbol;Acc:MGI:1345634]	chr8:93987719-93987759	ENSMUSG00000031751.14	chr8	93987719	93987759	-	41	0.672864	2.46221
Xrcc1	X-ray repair complementing defective repair in Chinese hamster cells 1 [Source:MGI Symbol;Acc:MGI:99137]	chr7:24547790-24548542	ENSMUSG00000051768.9	chr7	24547790	24548542	+	753	0.671378	2.15965
Rapgefl1	Rap guanine nucleotide exchange factor (GEF)-like 1 [Source:MGI Symbol;Acc:MGI:3611446]	chr11:98850332-98850429	ENSMUSG00000038020.5	chr11	98850332	98850429	+	98	0.667153	2.63971
Gabra4	gamma-aminobutyric acid (GABA) A receptor, subunit alpha 4 [Source:MGI Symbol;Acc:MGI:95616]	chr5:71657724-71657981	ENSMUSG00000029211.11	chr5	71657724	71657981	-	258	0.666431	3.41199
Nedd4	neural precursor cell expressed, developmentally down-regulated 4 [Source:MGI Symbol;Acc:MGI:97297]	chr9:72742653-72742760	ENSMUSG00000032216.15	chr9	72742653	72742760	+	108	0.665161	2.30274
Rgp1	RAB6A GEF compex partner 1 [Source:MGI Symbol;Acc:MGI:1915956]	chr4:43579375-43579622	ENSMUSG00000028468.15	chr4	43579375	43579622	+	248	0.66402	1.8977
Slc12a9	solute carrier family 12 (potassium/chloride transporters), member 9 [Source:MGI Symbol;Acc:MGI:1933532]	chr5:137330943-137331074	ENSMUSG00000037344.14	chr5	137330943	137331074	-	132	0.663577	2.02957
Caml	calcium modulating ligand [Source:MGI Symbol;Acc:MGI:104728]	chr13:55628577-55628642	ENSMUSG00000021501.4	chr13	55628577	55628642	+	66	0.661074	2.30939
Chordc1	cysteine and histidine-rich domain (CHORD)-containing, zinc-binding protein 1 [Source:MGI Symbol;Acc:MGI:1914167]	chr9:18305201-18305351	ENSMUSG00000001774.8	chr9	18305201	18305351	+	151	0.660628	3.12119
Rbpj	recombination signal binding protein for immunoglobulin kappa J region [Source:MGI Symbol;Acc:MGI:96522]	chr5:53638632-53642067	ENSMUSG00000039191.12	chr5	53638632	53642067	+	3436	0.657076	1.85016
Snap25	synaptosomal-associated protein 25 [Source:MGI Symbol;Acc:MGI:98331]	chr2:136758311-136762909	ENSMUSG00000027273.13	chr2	136758311	136762909	+	4599	0.656052	1.48643
Norad	non-coding RNA activated by DNA damage [Source:MGI Symbol;Acc:MGI:1914767]	chr2:156392491-156392829	ENSMUSG00000102869.2	chr2	156392491	156392829	-	339	0.655827	2.66122
Arhgap4	Rho GTPase activating protein 4 [Source:MGI Symbol;Acc:MGI:2159577]	chrX:73897754-73897888	ENSMUSG00000031389.17	chrX	73897754	73897888	-	135	0.654805	2.57361
Psmd1	proteasome (prosome, macropain) 26S subunit, non-ATPase, 1 [Source:MGI Symbol;Acc:MGI:1917497]	chr1:86127867-86128305	ENSMUSG00000026229.17	chr1	86127867	86128305	+	439	0.654287	2.57071
Guk1	guanylate kinase 1 [Source:MGI Symbol;Acc:MGI:95871]	chr11:59186400-59186441	ENSMUSG00000020444.19	chr11	59186400	59186441	-	42	0.650312	3.63397
Plod3	procollagen-lysine, 2-oxoglutarate 5-dioxygenase 3 [Source:MGI Symbol;Acc:MGI:1347008]	chr5:136990418-136990539	ENSMUSG00000004846.10	chr5	136990418	136990539	+	122	0.64977	2.69926
Guk1	guanylate kinase 1 [Source:MGI Symbol;Acc:MGI:95871]	chr11:59186182-59186441	ENSMUSG00000020444.19	chr11	59186182	59186441	-	260	0.647259	3.84518
Gale	galactose-4-epimerase, UDP [Source:MGI Symbol;Acc:MGI:1921496]	chr4:135965334-135965456	ENSMUSG00000028671.16	chr4	135965334	135965456	+	123	0.646244	2.76469
Usp19	ubiquitin specific peptidase 19 [Source:MGI Symbol;Acc:MGI:1918722]	chr9:108490845-108490895	ENSMUSG00000006676.16	chr9	108490845	108490895	+	51	0.645605	2.0992
Chordc1	cysteine and histidine-rich domain (CHORD)-containing, zinc-binding protein 1 [Source:MGI Symbol;Acc:MGI:1914167]	chr9:18305293-18305351	ENSMUSG00000001774.8	chr9	18305293	18305351	+	59	0.643348	3.0982
Chordc1	cysteine and histidine-rich domain (CHORD)-containing, zinc-binding protein 1 [Source:MGI Symbol;Acc:MGI:1914167]	chr9:18305296-18305351	ENSMUSG00000001774.8	chr9	18305296	18305351	+	56	0.643348	3.0982
Ruvbl2	RuvB-like protein 2 [Source:MGI Symbol;Acc:MGI:1342299]	chr7:45429909-45429964	ENSMUSG00000003868.14	chr7	45429909	45429964	-	56	0.643282	2.25427
Fam189b	family with sequence similarity 189, member B [Source:MGI Symbol;Acc:MGI:1915771]	chr3:89187934-89188144	ENSMUSG00000032657.15	chr3	89187934	89188144	+	211	0.642124	2.61742
Tmem256	transmembrane protein 256 [Source:MGI Symbol;Acc:MGI:1916436]	chr11:69839188-69839268	ENSMUSG00000070394.10	chr11	69839188	69839268	+	81	0.640471	3.52605
Cap1	CAP, adenylate cyclase-associated protein 1 (yeast) [Source:MGI Symbol;Acc:MGI:88262]	chr4:122885814-122885864	ENSMUSG00000028656.14	chr4	122885814	122885864	-	51	0.639304	1.91631
Cap1	CAP, adenylate cyclase-associated protein 1 (yeast) [Source:MGI Symbol;Acc:MGI:88262]	chr4:122885833-122885860	ENSMUSG00000028656.14	chr4	122885833	122885860	-	28	0.639304	1.91631
Fam20b	FAM20B, glycosaminoglycan xylosylkinase [Source:MGI Symbol;Acc:MGI:2443990]	chr1:156718866-156719086	ENSMUSG00000033557.17	chr1	156718866	156719086	-	221	0.63843	1.97182
Fut8	fucosyltransferase 8 [Source:MGI Symbol;Acc:MGI:1858901]	chr12:77277361-77280473	ENSMUSG00000021065.16	chr12	77277361	77280473	+	3113	0.63802	1.92706
Nt5c3	5-nucleotidase, cytosolic III [Source:MGI Symbol;Acc:MGI:1927186]	chr6:56895794-56897829	ENSMUSG00000029780.14	chr6	56895794	56897829	-	2036	0.637145	1.8543
Clu	clusterin [Source:MGI Symbol;Acc:MGI:88423]	chr14:65968483-65968688	ENSMUSG00000022037.15	chr14	65968483	65968688	+	206	0.635276	1.0646
Gabbr2	gamma-aminobutyric acid (GABA) B receptor, 2 [Source:MGI Symbol;Acc:MGI:2386030]	chr4:46804059-46804124	ENSMUSG00000039809.10	chr4	46804059	46804124	-	66	0.634735	1.90673
Dtna	dystrobrevin alpha [Source:MGI Symbol;Acc:MGI:106039]	chr18:23543562-23546647	ENSMUSG00000024302.16	chr18	23543562	23546647	+	3086	0.634096	1.73219
Tbc1d5	TBC1 domain family, member 5 [Source:MGI Symbol;Acc:MGI:1919488]	chr17:50741476-50741619	ENSMUSG00000023923.10	chr17	50741476	50741619	-	144	0.631244	3.1117
Cap1	CAP, adenylate cyclase-associated protein 1 (yeast) [Source:MGI Symbol;Acc:MGI:88262]	chr4:122885833-122886044	ENSMUSG00000028656.14	chr4	122885833	122886044	-	212	0.623697	1.2386
Mettl23	methyltransferase like 23 [Source:MGI Symbol;Acc:MGI:1921569]	chr11:116843278-116843774	ENSMUSG00000090266.10	chr11	116843278	116843774	+	497	0.621958	2.85497
Cep57	centrosomal protein 57 [Source:MGI Symbol;Acc:MGI:1915551]	chr9:13826856-13826955	ENSMUSG00000031922.12	chr9	13826856	13826955	-	100	0.621416	4.18279
Mepce	methylphosphate capping enzyme [Source:MGI Symbol;Acc:MGI:106477]	chr5:137787395-137787655	ENSMUSG00000029726.16	chr5	137787395	137787655	-	261	0.61819	2.11215
Atp5c1	ATP synthase, H+ transporting, mitochondrial F1 complex, gamma polypeptide 1 [Source:MGI Symbol;Acc:MGI:1261437]	chr2:10063286-10063350	ENSMUSG00000025781.14	chr2	10063286	10063350	-	65	0.616791	2.39176
Dgkz	diacylglycerol kinase zeta [Source:MGI Symbol;Acc:MGI:1278339]	chr2:91934816-91934859	ENSMUSG00000040479.12	chr2	91934816	91934859	-	44	0.61527	2.96693
Vkorc1l1	vitamin K epoxide reductase complex, subunit 1-like 1 [Source:MGI Symbol;Acc:MGI:1916818]	chr5:129941970-129942365	ENSMUSG00000066735.8	chr5	129941970	129942365	+	396	0.613818	1.7086
Usp19	ubiquitin specific peptidase 19 [Source:MGI Symbol;Acc:MGI:1918722]	chr9:108490840-108490895	ENSMUSG00000006676.16	chr9	108490840	108490895	+	56	0.612427	2.10512
Hibadh	3-hydroxyisobutyrate dehydrogenase [Source:MGI Symbol;Acc:MGI:1889802]	chr6:52640161-52640389	ENSMUSG00000029776.11	chr6	52640161	52640389	-	229	0.610432	2.5011
Lonp2	lon peptidase 2, peroxisomal [Source:MGI Symbol;Acc:MGI:1914137]	chr8:86722493-86723873	ENSMUSG00000047866.18	chr8	86722493	86723873	+	1381	0.608096	1.50298
Stac3	SH3 and cysteine rich domain 3 [Source:MGI Symbol;Acc:MGI:3606571]	chr10:127503090-127503354	ENSMUSG00000040287.9	chr10	127503090	127503354	+	265	0.607137	3.08595
Tut1	terminal uridylyl transferase 1, U6 snRNA-specific [Source:MGI Symbol;Acc:MGI:1917294]	chr19:8964020-8964129	ENSMUSG00000071645.6	chr19	8964020	8964129	+	110	0.606781	2.96944
Carmil1	capping protein regulator and myosin 1 linker 1 [Source:MGI Symbol;Acc:MGI:1915982]	chr13:24137757-24139377	ENSMUSG00000021338.17	chr13	24137757	24139377	-	1621	0.603839	1.412
Pkm	pyruvate kinase, muscle [Source:MGI Symbol;Acc:MGI:97591]	chr9:59671586-59671725	ENSMUSG00000032294.17	chr9	59671586	59671725	+	140	0.602237	2.71332
Pkm	pyruvate kinase, muscle [Source:MGI Symbol;Acc:MGI:97591]	chr9:59671575-59671725	ENSMUSG00000032294.17	chr9	59671575	59671725	+	151	0.602237	2.71332
Fbxw11	F-box and WD-40 domain protein 11 [Source:MGI Symbol;Acc:MGI:2144023]	chr11:32652748-32652904	ENSMUSG00000020271.17	chr11	32652748	32652904	+	157	0.596759	1.60394
Snhg4	small nucleolar RNA host gene 4 [Source:MGI Symbol;Acc:MGI:4937091]	chr18:35556616-35556691	ENSMUSG00000117694.1	chr18	35556616	35556691	+	76	0.59666	1.51952
Xrcc1	X-ray repair complementing defective repair in Chinese hamster cells 1 [Source:MGI Symbol;Acc:MGI:99137]	chr7:24547790-24547882	ENSMUSG00000051768.9	chr7	24547790	24547882	+	93	0.592527	3.02911
Kcnt2	potassium channel, subfamily T, member 2 [Source:MGI Symbol;Acc:MGI:3036273]	chr1:140509384-140509613	ENSMUSG00000052726.16	chr1	140509384	140509613	+	230	0.589945	3.06998
Cdc42bpa	CDC42 binding protein kinase alpha [Source:MGI Symbol;Acc:MGI:2441841]	chr1:180114023-180116307	ENSMUSG00000026490.18	chr1	180114023	180116307	+	2285	0.589058	1.29866
Lmo4	LIM domain only 4 [Source:MGI Symbol;Acc:MGI:109360]	chr3:144194407-144194818	ENSMUSG00000028266.17	chr3	144194407	144194818	-	412	0.585346	2.29397
Rgs7	regulator of G protein signaling 7 [Source:MGI Symbol;Acc:MGI:1346089]	chr1:175492261-175492390	ENSMUSG00000026527.13	chr1	175492261	175492390	-	130	0.584186	2.87278
Pxk	PX domain containing serine/threonine kinase [Source:MGI Symbol;Acc:MGI:1289230]	chr14:8140642-8140746	ENSMUSG00000033885.15	chr14	8140642	8140746	+	105	0.584062	2.6634
Ufm1	ubiquitin-fold modifier 1 [Source:MGI Symbol;Acc:MGI:1915140]	chr3:53861215-53861272	ENSMUSG00000027746.13	chr3	53861215	53861272	-	58	0.583501	3.86195
Cap1	CAP, adenylate cyclase-associated protein 1 (yeast) [Source:MGI Symbol;Acc:MGI:88262]	chr4:122885814-122886056	ENSMUSG00000028656.14	chr4	122885814	122886056	-	243	0.581854	1.00343
Arpc1b	actin related protein 2/3 complex, subunit 1B [Source:MGI Symbol;Acc:MGI:1343142]	chr5:145127821-145129699	ENSMUSG00000029622.16	chr5	145127821	145129699	+	1879	0.575286	3.27918
Gorasp2	golgi reassembly stacking protein 2 [Source:MGI Symbol;Acc:MGI:2135962]	chr2:70683980-70684103	ENSMUSG00000014959.12	chr2	70683980	70684103	+	124	0.574068	3.04124
Rplp1	ribosomal protein, large, P1 [Source:MGI Symbol;Acc:MGI:1927099]	chr9:61913888-61913962	ENSMUSG00000007892.8	chr9	61913888	61913962	-	75	0.5739	1.76321
Vps54	VPS54 GARP complex subunit [Source:MGI Symbol;Acc:MGI:2178798]	chr11:21314919-21315026	ENSMUSG00000020128.15	chr11	21314919	21315026	+	108	0.573611	5.51772
Sms	spermine synthase [Source:MGI Symbol;Acc:MGI:109490]	chrX:157461961-157462136	ENSMUSG00000071708.11	chrX	157461961	157462136	-	176	0.569293	1.57598
Wdr91	WD repeat domain 91 [Source:MGI Symbol;Acc:MGI:2141558]	chr6:34889237-34889331	ENSMUSG00000058486.11	chr6	34889237	34889331	-	95	0.564736	3.6844
Ik	IK cytokine [Source:MGI Symbol;Acc:MGI:1345142]	chr18:36748164-36748223	ENSMUSG00000024474.7	chr18	36748164	36748223	+	60	0.564618	3.76005
Zfp608	zinc finger protein 608 [Source:MGI Symbol;Acc:MGI:2442338]	chr18:54892481-54894623	ENSMUSG00000052713.9	chr18	54892481	54894623	-	2143	0.562375	2.28115
Vps54	VPS54 GARP complex subunit [Source:MGI Symbol;Acc:MGI:2178798]	chr11:21314919-21314993	ENSMUSG00000020128.15	chr11	21314919	21314993	+	75	0.562295	5.50042
Tspan3	tetraspanin 3 [Source:MGI Symbol;Acc:MGI:1928098]	chr9:56160800-56160920	ENSMUSG00000032324.11	chr9	56160800	56160920	-	121	0.562189	1.66752
Ppip5k2	diphosphoinositol pentakisphosphate kinase 2 [Source:MGI Symbol;Acc:MGI:2142810]	chr1:97713004-97715149	ENSMUSG00000040648.14	chr1	97713004	97715149	-	2146	0.560814	2.77508
Adgrl3	adhesion G protein-coupled receptor L3 [Source:MGI Symbol;Acc:MGI:2441950]	chr5:81020755-81021345	ENSMUSG00000037605.16	chr5	81020755	81021345	+	591	0.559055	2.67768
Adgrl3	adhesion G protein-coupled receptor L3 [Source:MGI Symbol;Acc:MGI:2441950]	chr5:81020752-81021345	ENSMUSG00000037605.16	chr5	81020752	81021345	+	594	0.559055	2.67768
Usp19	ubiquitin specific peptidase 19 [Source:MGI Symbol;Acc:MGI:1918722]	chr9:108490856-108490895	ENSMUSG00000006676.16	chr9	108490856	108490895	+	40	0.557615	1.97369
Peds1	plasmanylethanolamine desaturase 1 [Source:MGI Symbol;Acc:MGI:2142624]	chr2:167661373-167661556	ENSMUSG00000090213.1	chr2	167661373	167661556	-	184	0.557486	2.34398
Peds1	plasmanylethanolamine desaturase 1 [Source:MGI Symbol;Acc:MGI:2142624]	chr2:167661373-167661554	ENSMUSG00000090213.1	chr2	167661373	167661554	-	182	0.557486	2.34398
Sec23a	SEC23 homolog A, COPII coat complex component [Source:MGI Symbol;Acc:MGI:1349635]	chr12:58986091-58986171	ENSMUSG00000020986.13	chr12	58986091	58986171	-	81	0.557484	2.81951
Sec61a1	Sec61 alpha 1 subunit (S. cerevisiae) [Source:MGI Symbol;Acc:MGI:1858417]	chr6:88518686-88518793	ENSMUSG00000030082.14	chr6	88518686	88518793	-	108	0.55684	2.55739
Sec61a1	Sec61 alpha 1 subunit (S. cerevisiae) [Source:MGI Symbol;Acc:MGI:1858417]	chr6:88518686-88518773	ENSMUSG00000030082.14	chr6	88518686	88518773	-	88	0.55684	2.55739
Sec61a1	Sec61 alpha 1 subunit (S. cerevisiae) [Source:MGI Symbol;Acc:MGI:1858417]	chr6:88518686-88518791	ENSMUSG00000030082.14	chr6	88518686	88518791	-	106	0.55684	2.55739
Tk2	thymidine kinase 2, mitochondrial [Source:MGI Symbol;Acc:MGI:1913266]	chr8:104248026-104248532	ENSMUSG00000035824.7	chr8	104248026	104248532	-	507	0.556515	1.15924
Vkorc1l1	vitamin K epoxide reductase complex, subunit 1-like 1 [Source:MGI Symbol;Acc:MGI:1916818]	chr5:129942109-129942365	ENSMUSG00000066735.8	chr5	129942109	129942365	+	257	0.554859	1.8764
Pde3a	phosphodiesterase 3A, cGMP inhibited [Source:MGI Symbol;Acc:MGI:1860764]	chr6:141249269-141250543	ENSMUSG00000041741.10	chr6	141249269	141250543	+	1275	0.554433	2.88616
Aqr	aquarius [Source:MGI Symbol;Acc:MGI:1276102]	chr2:114152743-114155041	ENSMUSG00000040383.16	chr2	114152743	114155041	-	2299	0.553506	2.22995
Ppwd1	peptidylprolyl isomerase domain and WD repeat containing 1 [Source:MGI Symbol;Acc:MGI:2443069]	chr13:104228606-104228843	ENSMUSG00000021713.9	chr13	104228606	104228843	-	238	0.552347	2.48888
St3gal5	ST3 beta-galactoside alpha-2,3-sialyltransferase 5 [Source:MGI Symbol;Acc:MGI:1339963]	chr6:72097757-72097994	ENSMUSG00000056091.12	chr6	72097757	72097994	+	238	0.551534	2.29506
Taf1d	TATA-box binding protein associated factor, RNA polymerase I, D [Source:MGI Symbol;Acc:MGI:1922566]	chr9:15306873-15306990	ENSMUSG00000031939.16	chr9	15306873	15306990	+	118	0.550308	3.09852
Snn	stannin [Source:MGI Symbol;Acc:MGI:1276549]	chr16:11066330-11066447	ENSMUSG00000037972.7	chr16	11066330	11066447	+	118	0.549198	1.35761
Prkag2	protein kinase, AMP-activated, gamma 2 non-catalytic subunit [Source:MGI Symbol;Acc:MGI:1336153]	chr5:24995262-24995753	ENSMUSG00000028944.14	chr5	24995262	24995753	-	492	0.548423	1.75809
Meg3	maternally expressed 3 [Source:MGI Symbol;Acc:MGI:1202886]	chr12:109549479-109549552	ENSMUSG00000021268.17	chr12	109549479	109549552	+	74	0.547106	2.31948
Tbc1d9	TBC1 domain family, member 9 [Source:MGI Symbol;Acc:MGI:1918560]	chr8:83269144-83269247	ENSMUSG00000031709.15	chr8	83269144	83269247	+	104	0.54658	3.73743
Rab2a	RAB2A, member RAS oncogene family [Source:MGI Symbol;Acc:MGI:1928750]	chr4:8572526-8572593	ENSMUSG00000047187.9	chr4	8572526	8572593	+	68	0.545063	2.882
Spock1	sparc/osteonectin, cwcv and kazal-like domains proteoglycan 1 [Source:MGI Symbol;Acc:MGI:105371]	chr13:57434415-57436172	ENSMUSG00000056222.15	chr13	57434415	57436172	-	1758	0.544742	1.49838
Prrc2b	proline-rich coiled-coil 2B [Source:MGI Symbol;Acc:MGI:1923304]	chr2:32221345-32221435	ENSMUSG00000039262.16	chr2	32221345	32221435	+	91	0.541961	2.66376
Shisa4	shisa family member 4 [Source:MGI Symbol;Acc:MGI:1924802]	chr1:135374889-135375077	ENSMUSG00000041889.7	chr1	135374889	135375077	-	189	0.536221	3.02839
Lrpprc	leucine-rich PPR-motif containing [Source:MGI Symbol;Acc:MGI:1919666]	chr17:84766428-84767111	ENSMUSG00000024120.12	chr17	84766428	84767111	-	684	0.535995	1.67968
Ssbp4	single stranded DNA binding protein 4 [Source:MGI Symbol;Acc:MGI:1924150]	chr8:70600852-70601050	ENSMUSG00000070003.7	chr8	70600852	70601050	-	199	0.53573	3.0065
Rtn1	reticulon 1 [Source:MGI Symbol;Acc:MGI:1933947]	chr12:72235473-72236548	ENSMUSG00000021087.18	chr12	72235473	72236548	-	1076	0.534932	1.67316
Tmem256	transmembrane protein 256 [Source:MGI Symbol;Acc:MGI:1916436]	chr11:69838563-69839268	ENSMUSG00000070394.10	chr11	69838563	69839268	+	706	0.533927	2.32277
Tspan3	tetraspanin 3 [Source:MGI Symbol;Acc:MGI:1928098]	chr9:56160800-56161057	ENSMUSG00000032324.11	chr9	56160800	56161057	-	258	0.531378	1.53253
Tspan14	tetraspanin 14 [Source:MGI Symbol;Acc:MGI:1196325]	chr14:40911113-40911157	ENSMUSG00000037824.6	chr14	40911113	40911157	-	45	0.530994	2.34675
Nipsnap3b	nipsnap homolog 3B [Source:MGI Symbol;Acc:MGI:1913786]	chr4:53020976-53021197	ENSMUSG00000015247.10	chr4	53020976	53021197	+	222	0.529887	2.35117
Gdi2	guanosine diphosphate (GDP) dissociation inhibitor 2 [Source:MGI Symbol;Acc:MGI:99845]	chr13:3538130-3543080	ENSMUSG00000021218.10	chr13	3538130	3543080	+	4951	0.528487	0.950215
Lmbr1	limb region 1 [Source:MGI Symbol;Acc:MGI:1861746]	chr5:29364921-29365815	ENSMUSG00000010721.15	chr5	29364921	29365815	-	895	0.52828	1.38091
St3gal5	ST3 beta-galactoside alpha-2,3-sialyltransferase 5 [Source:MGI Symbol;Acc:MGI:1339963]	chr6:72097623-72097994	ENSMUSG00000056091.12	chr6	72097623	72097994	+	372	0.527578	2.01081
Acat3	acetyl-Coenzyme A acetyltransferase 3 [Source:MGI Symbol;Acc:MGI:109182]	chr17:12934821-12935002	ENSMUSG00000062480.12	chr17	12934821	12935002	-	182	0.527441	2.10589
Tpt1	tumor protein, translationally-controlled 1 [Source:MGI Symbol;Acc:MGI:104890]	chr14:75845617-75845969	ENSMUSG00000060126.14	chr14	75845617	75845969	+	353	0.527433	1.65357
Crip2	cysteine rich protein 2 [Source:MGI Symbol;Acc:MGI:1915587]	chr12:113144229-113144297	ENSMUSG00000006356.10	chr12	113144229	113144297	+	69	0.525713	2.40414
Dkk3	dickkopf WNT signaling pathway inhibitor 3 [Source:MGI Symbol;Acc:MGI:1354952]	chr7:112158183-112158418	ENSMUSG00000030772.6	chr7	112158183	112158418	-	236	0.524889	2.73162
Shisa4	shisa family member 4 [Source:MGI Symbol;Acc:MGI:1924802]	chr1:135374889-135375237	ENSMUSG00000041889.7	chr1	135374889	135375237	-	349	0.524726	3.56204
Rbm12b1	RNA binding motif protein 12 B1 [Source:MGI Symbol;Acc:MGI:1919647]	chr4:12140317-12140605	ENSMUSG00000046667.14	chr4	12140317	12140605	+	289	0.524351	2.63499
Brd1	bromodomain containing 1 [Source:MGI Symbol;Acc:MGI:1924161]	chr15:88712900-88712928	ENSMUSG00000022387.17	chr15	88712900	88712928	-	29	0.523689	3.20217
Ints2	integrator complex subunit 2 [Source:MGI Symbol;Acc:MGI:1917672]	chr11:86235612-86238373	ENSMUSG00000018068.13	chr11	86235612	86238373	-	2762	0.522836	1.50247
Vars	valyl-tRNA synthetase [Source:MGI Symbol;Acc:MGI:90675]	chr17:35010838-35010919	ENSMUSG00000007029.16	chr17	35010838	35010919	+	82	0.52211	3.40338
Ldhb	lactate dehydrogenase B [Source:MGI Symbol;Acc:MGI:96763]	chr6:142492493-142492616	ENSMUSG00000030246.12	chr6	142492493	142492616	-	124	0.519672	2.17442
Efemp2	epidermal growth factor-containing fibulin-like extracellular matrix protein 2 [Source:MGI Symbol;Acc:MGI:1891209]	chr19:5474750-5475178	ENSMUSG00000024909.15	chr19	5474750	5475178	+	429	0.514266	2.3183
Taf9	TATA-box binding protein associated factor 9 [Source:MGI Symbol;Acc:MGI:1888697]	chr13:100651625-100651828	ENSMUSG00000052293.14	chr13	100651625	100651828	+	204	0.513892	1.23605
Atl1	atlastin GTPase 1 [Source:MGI Symbol;Acc:MGI:1921241]	chr12:69907805-69907992	ENSMUSG00000021066.9	chr12	69907805	69907992	+	188	0.512464	2.10252
Efemp2	epidermal growth factor-containing fibulin-like extracellular matrix protein 2 [Source:MGI Symbol;Acc:MGI:1891209]	chr19:5474777-5475178	ENSMUSG00000024909.15	chr19	5474777	5475178	+	402	0.512129	2.65027
Rhoa	ras homolog family member A [Source:MGI Symbol;Acc:MGI:1096342]	chr9:108306439-108311539	ENSMUSG00000007815.13	chr9	108306439	108311539	+	5101	0.511423	2.01053
Kyat3	kynurenine aminotransferase 3 [Source:MGI Symbol;Acc:MGI:2677849]	chr3:142734474-142734660	ENSMUSG00000040213.13	chr3	142734474	142734660	+	187	0.510968	3.63366
Tmem39b	transmembrane protein 39b [Source:MGI Symbol;Acc:MGI:2682939]	chr4:129692433-129692673	ENSMUSG00000053730.15	chr4	129692433	129692673	-	241	0.51059	2.51605
Synpr	synaptoporin [Source:MGI Symbol;Acc:MGI:1919253]	chr14:13608570-13610502	ENSMUSG00000056296.17	chr14	13608570	13610502	+	1933	0.509734	3.61133
Atl1	atlastin GTPase 1 [Source:MGI Symbol;Acc:MGI:1921241]	chr12:69907732-69907992	ENSMUSG00000021066.9	chr12	69907732	69907992	+	261	0.509496	1.96274
Nipbl	NIPBL cohesin loading factor [Source:MGI Symbol;Acc:MGI:1913976]	chr15:8323652-8323750	ENSMUSG00000022141.7	chr15	8323652	8323750	-	99	0.507217	2.60165
Tlcd3b	TLC domain containing 3B [Source:MGI Symbol;Acc:MGI:1916202]	chr7:126823303-126824212	ENSMUSG00000058966.13	chr7	126823303	126824212	+	910	0.50536	2.37738
Spag1	sperm associated antigen 1 [Source:MGI Symbol;Acc:MGI:1349387]	chr15:36186877-36191711	ENSMUSG00000037617.12	chr15	36186877	36191711	+	4835	0.504321	1.80583
Synpr	synaptoporin [Source:MGI Symbol;Acc:MGI:1919253]	chr14:13608570-13608761	ENSMUSG00000056296.17	chr14	13608570	13608761	+	192	0.503711	3.60101
Nkrf	NF-kappaB repressing factor [Source:MGI Symbol;Acc:MGI:1924536]	chrX:36902736-36902899	ENSMUSG00000044149.7	chrX	36902736	36902899	-	164	0.5027	2.07281
Dip2c	disco interacting protein 2 homolog C [Source:MGI Symbol;Acc:MGI:1920179]	chr13:9623757-9623868	ENSMUSG00000048264.16	chr13	9623757	9623868	+	112	0.499848	2.36174
Tmem106c	transmembrane protein 106C [Source:MGI Symbol;Acc:MGI:1196384]	chr15:97967187-97967281	ENSMUSG00000052369.8	chr15	97967187	97967281	+	95	0.497476	3.61982
Naa30	N(alpha)-acetyltransferase 30, NatC catalytic subunit [Source:MGI Symbol;Acc:MGI:1922259]	chr14:49178523-49180761	ENSMUSG00000036282.15	chr14	49178523	49180761	+	2239	0.49731	1.28292
Sec61a1	Sec61 alpha 1 subunit (S. cerevisiae) [Source:MGI Symbol;Acc:MGI:1858417]	chr6:88518686-88518905	ENSMUSG00000030082.14	chr6	88518686	88518905	-	220	0.496949	1.66114
Sec61a1	Sec61 alpha 1 subunit (S. cerevisiae) [Source:MGI Symbol;Acc:MGI:1858417]	chr6:88518686-88518903	ENSMUSG00000030082.14	chr6	88518686	88518903	-	218	0.496949	1.66114
Tmem106c	transmembrane protein 106C [Source:MGI Symbol;Acc:MGI:1196384]	chr15:97967187-97967277	ENSMUSG00000052369.8	chr15	97967187	97967277	+	91	0.496622	3.61833
Mpped1	metallophosphoesterase domain containing 1 [Source:MGI Symbol;Acc:MGI:106316]	chr15:83854412-83854523	ENSMUSG00000041708.12	chr15	83854412	83854523	+	112	0.495595	2.14892
Mpped1	metallophosphoesterase domain containing 1 [Source:MGI Symbol;Acc:MGI:106316]	chr15:83854412-83854525	ENSMUSG00000041708.12	chr15	83854412	83854525	+	114	0.495595	2.14892
Rbm12b1	RNA binding motif protein 12 B1 [Source:MGI Symbol;Acc:MGI:1919647]	chr4:12140285-12140605	ENSMUSG00000046667.14	chr4	12140285	12140605	+	321	0.495198	2.33147
Amz1	archaelysin family metallopeptidase 1 [Source:MGI Symbol;Acc:MGI:2442258]	chr5:140749155-140749331	ENSMUSG00000050022.16	chr5	140749155	140749331	+	177	0.494405	2.54903
Pitpnm2	phosphatidylinositol transfer protein, membrane-associated 2 [Source:MGI Symbol;Acc:MGI:1336192]	chr5:124121873-124122056	ENSMUSG00000029406.15	chr5	124121873	124122056	-	184	0.492217	2.54501
Pitpnm2	phosphatidylinositol transfer protein, membrane-associated 2 [Source:MGI Symbol;Acc:MGI:1336192]	chr5:124121873-124122100	ENSMUSG00000029406.15	chr5	124121873	124122100	-	228	0.492217	2.54501
Cap1	CAP, adenylate cyclase-associated protein 1 (yeast) [Source:MGI Symbol;Acc:MGI:88262]	chr4:122885814-122885911	ENSMUSG00000028656.14	chr4	122885814	122885911	-	98	0.492163	1.52352
Rpl19	ribosomal protein L19 [Source:MGI Symbol;Acc:MGI:98020]	chr11:98029395-98029515	ENSMUSG00000017404.12	chr11	98029395	98029515	+	121	0.492093	1.96591
Ppp1r1b	protein phosphatase 1, regulatory inhibitor subunit 1B [Source:MGI Symbol;Acc:MGI:94860]	chr11:98349996-98350629	ENSMUSG00000061718.12	chr11	98349996	98350629	+	634	0.490274	2.17328
Tpt1	tumor protein, translationally-controlled 1 [Source:MGI Symbol;Acc:MGI:104890]	chr14:75845617-75845690	ENSMUSG00000060126.14	chr14	75845617	75845690	+	74	0.490168	2.45068
Tmem106c	transmembrane protein 106C [Source:MGI Symbol;Acc:MGI:1196384]	chr15:97967187-97967327	ENSMUSG00000052369.8	chr15	97967187	97967327	+	141	0.489181	3.98502
Ssbp2	single-stranded DNA binding protein 2 [Source:MGI Symbol;Acc:MGI:1914220]	chr13:91564610-91565210	ENSMUSG00000003992.15	chr13	91564610	91565210	+	601	0.488997	2.34939
Lrrc26	leucine rich repeat containing 26 [Source:MGI Symbol;Acc:MGI:2385129]	chr2:25290738-25291180	ENSMUSG00000026961.6	chr2	25290738	25291180	+	443	0.48649	3.23216
Miat	myocardial infarction associated transcript (non-protein coding) [Source:MGI Symbol;Acc:MGI:2444886]	chr5:112228609-112229395	ENSMUSG00000097767.8	chr5	112228609	112229395	-	787	0.485115	1.45814
Rpl18a	ribosomal protein L18A [Source:MGI Symbol;Acc:MGI:1924058]	chr8:70895600-70895709	ENSMUSG00000045128.9	chr8	70895600	70895709	-	110	0.483454	2.38582
Gbf1	golgi-specific brefeldin A-resistance factor 1 [Source:MGI Symbol;Acc:MGI:1861607]	chr19:46170657-46172516	ENSMUSG00000025224.16	chr19	46170657	46172516	+	1860	0.481897	0.695148
Siae	sialic acid acetylesterase [Source:MGI Symbol;Acc:MGI:104803]	chr9:37644752-37645256	ENSMUSG00000001942.8	chr9	37644752	37645256	+	505	0.481872	2.51503
Dip2a	disco interacting protein 2 homolog A [Source:MGI Symbol;Acc:MGI:2385920]	chr10:76270396-76270571	ENSMUSG00000020231.15	chr10	76270396	76270571	-	176	0.481724	2.93386
Golga7b	golgi autoantigen, golgin subfamily a, 7B [Source:MGI Symbol;Acc:MGI:1918396]	chr19:42255739-42256183	ENSMUSG00000042532.14	chr19	42255739	42256183	+	445	0.480672	2.33653
Vcp	valosin containing protein [Source:MGI Symbol;Acc:MGI:99919]	chr4:42990746-42990877	ENSMUSG00000028452.7	chr4	42990746	42990877	-	132	0.479603	2.68867
Gaa	glucosidase, alpha, acid [Source:MGI Symbol;Acc:MGI:95609]	chr11:119277694-119277778	ENSMUSG00000025579.14	chr11	119277694	119277778	+	85	0.477824	3.4461
Gaa	glucosidase, alpha, acid [Source:MGI Symbol;Acc:MGI:95609]	chr11:119277714-119277778	ENSMUSG00000025579.14	chr11	119277714	119277778	+	65	0.477824	3.4461
Tmem175	transmembrane protein 175 [Source:MGI Symbol;Acc:MGI:1919642]	chr5:108630002-108630043	ENSMUSG00000013495.15	chr5	108630002	108630043	+	42	0.474686	4.053
Scmh1	sex comb on midleg homolog 1 [Source:MGI Symbol;Acc:MGI:1352762]	chr4:120447033-120448732	ENSMUSG00000000085.16	chr4	120447033	120448732	+	1700	0.473802	1.15147
Nup133	nucleoporin 133 [Source:MGI Symbol;Acc:MGI:2442620]	chr8:123919836-123920942	ENSMUSG00000039509.8	chr8	123919836	123920942	-	1107	0.473701	1.8883
Polr3a	polymerase (RNA) III (DNA directed) polypeptide A [Source:MGI Symbol;Acc:MGI:2681836]	chr14:24474173-24474313	ENSMUSG00000025280.8	chr14	24474173	24474313	-	141	0.471481	2.44081
Prps2	phosphoribosyl pyrophosphate synthetase 2 [Source:MGI Symbol;Acc:MGI:97776]	chrX:167352136-167352309	ENSMUSG00000025742.5	chrX	167352136	167352309	-	174	0.471022	1.95028
Cct6a	chaperonin containing Tcp1, subunit 6a (zeta) [Source:MGI Symbol;Acc:MGI:107943]	chr5:129787439-129787575	ENSMUSG00000029447.11	chr5	129787439	129787575	+	137	0.470654	3.93492
Hibadh	3-hydroxyisobutyrate dehydrogenase [Source:MGI Symbol;Acc:MGI:1889802]	chr6:52634232-52640315	ENSMUSG00000029776.11	chr6	52634232	52640315	-	6084	0.470405	2.09731
Idh3b	isocitrate dehydrogenase 3 (NAD+) beta [Source:MGI Symbol;Acc:MGI:2158650]	chr2:130281848-130281908	ENSMUSG00000027406.13	chr2	130281848	130281908	-	61	0.4696	2.65459
Rps29	ribosomal protein S29 [Source:MGI Symbol;Acc:MGI:107681]	chr12:69158997-69159186	ENSMUSG00000034892.8	chr12	69158997	69159186	-	190	0.467439	1.55824
Kcnn2	potassium intermediate/small conductance calcium-activated channel, subfamily N, member 2 [Source:MGI Symbol;Acc:MGI:2153182]	chr18:45655253-45655339	ENSMUSG00000054477.16	chr18	45655253	45655339	+	87	0.466859	3.5774
Opa1	OPA1, mitochondrial dynamin like GTPase [Source:MGI Symbol;Acc:MGI:1921393]	chr16:29630084-29630404	ENSMUSG00000038084.16	chr16	29630084	29630404	+	321	0.465979	2.07911
Calr	calreticulin [Source:MGI Symbol;Acc:MGI:88252]	chr8:84846708-84846934	ENSMUSG00000003814.8	chr8	84846708	84846934	-	227	0.465792	1.25174
Calr	calreticulin [Source:MGI Symbol;Acc:MGI:88252]	chr8:84846708-84846826	ENSMUSG00000003814.8	chr8	84846708	84846826	-	119	0.465792	1.25174
Calr	calreticulin [Source:MGI Symbol;Acc:MGI:88252]	chr8:84846708-84846830	ENSMUSG00000003814.8	chr8	84846708	84846830	-	123	0.465792	1.25174
Gabra3	gamma-aminobutyric acid (GABA) A receptor, subunit alpha 3 [Source:MGI Symbol;Acc:MGI:95615]	chrX:72540063-72540184	ENSMUSG00000031343.13	chrX	72540063	72540184	-	122	0.459979	3.06331
Prpf31	pre-mRNA processing factor 31 [Source:MGI Symbol;Acc:MGI:1916238]	chr7:3636662-3637057	ENSMUSG00000008373.16	chr7	3636662	3637057	+	396	0.459115	2.81807
Chchd1	coiled-coil-helix-coiled-coil-helix domain containing 1 [Source:MGI Symbol;Acc:MGI:1913371]	chr14:20703290-20703408	ENSMUSG00000063787.4	chr14	20703290	20703408	+	119	0.458448	2.73017
Rnft2	ring finger protein, transmembrane 2 [Source:MGI Symbol;Acc:MGI:2442859]	chr5:118194054-118194666	ENSMUSG00000032850.16	chr5	118194054	118194666	-	613	0.458371	1.08474
Zfhx2os	zinc finger homeobox 2, opposite strand [Source:MGI Symbol;Acc:MGI:3620246]	chr14:55054882-55055061	ENSMUSG00000093452.4	chr14	55054882	55055061	+	180	0.457803	2.41475
Ncapd2	non-SMC condensin I complex, subunit D2 [Source:MGI Symbol;Acc:MGI:1915548]	chr6:125168863-125169284	ENSMUSG00000038252.13	chr6	125168863	125169284	-	422	0.457583	3.2605
Chfr	checkpoint with forkhead and ring finger domains [Source:MGI Symbol;Acc:MGI:2444898]	chr5:110146470-110146547	ENSMUSG00000014668.15	chr5	110146470	110146547	+	78	0.456527	3.24022
Arih2	ariadne RBR E3 ubiquitin protein ligase 2 [Source:MGI Symbol;Acc:MGI:1344361]	chr9:108605274-108605417	ENSMUSG00000064145.12	chr9	108605274	108605417	-	144	0.455018	2.99865
Cap1	CAP, adenylate cyclase-associated protein 1 (yeast) [Source:MGI Symbol;Acc:MGI:88262]	chr4:122885833-122885965	ENSMUSG00000028656.14	chr4	122885833	122885965	-	133	0.453424	1.26494
Tmem18	transmembrane protein 18 [Source:MGI Symbol;Acc:MGI:2387176]	chr12:30586914-30587254	ENSMUSG00000043061.10	chr12	30586914	30587254	+	341	0.453097	2.17992
Chchd1	coiled-coil-helix-coiled-coil-helix domain containing 1 [Source:MGI Symbol;Acc:MGI:1913371]	chr14:20703290-20703609	ENSMUSG00000063787.4	chr14	20703290	20703609	+	320	0.451894	3.32466
Gabra4	gamma-aminobutyric acid (GABA) A receptor, subunit alpha 4 [Source:MGI Symbol;Acc:MGI:95616]	chr5:71657724-71658308	ENSMUSG00000029211.11	chr5	71657724	71658308	-	585	0.451441	1.99877
Mcoln1	mucolipin 1 [Source:MGI Symbol;Acc:MGI:1890498]	chr8:3508684-3508780	ENSMUSG00000004567.16	chr8	3508684	3508780	+	97	0.451103	2.96633
Ddx24	DEAD box helicase 24 [Source:MGI Symbol;Acc:MGI:1351337]	chr12:103416196-103416271	ENSMUSG00000041645.14	chr12	103416196	103416271	-	76	0.450325	3.28998
Slc30a3	solute carrier family 30 (zinc transporter), member 3 [Source:MGI Symbol;Acc:MGI:1345280]	chr5:31093263-31093615	ENSMUSG00000029151.14	chr5	31093263	31093615	-	353	0.450088	2.23495
Rgma	repulsive guidance molecule family member A [Source:MGI Symbol;Acc:MGI:2679262]	chr7:73391381-73391496	ENSMUSG00000070509.15	chr7	73391381	73391496	+	116	0.448812	2.44887
Chchd1	coiled-coil-helix-coiled-coil-helix domain containing 1 [Source:MGI Symbol;Acc:MGI:1913371]	chr14:20703276-20703408	ENSMUSG00000063787.4	chr14	20703276	20703408	+	133	0.44771	2.74695
Akt2	thymoma viral proto-oncogene 2 [Source:MGI Symbol;Acc:MGI:104874]	chr7:27628525-27628990	ENSMUSG00000004056.15	chr7	27628525	27628990	+	466	0.44741	1.48989
Rgma	repulsive guidance molecule family member A [Source:MGI Symbol;Acc:MGI:2679262]	chr7:73391227-73391496	ENSMUSG00000070509.15	chr7	73391227	73391496	+	270	0.446191	2.50561
Slc30a3	solute carrier family 30 (zinc transporter), member 3 [Source:MGI Symbol;Acc:MGI:1345280]	chr5:31093263-31093469	ENSMUSG00000029151.14	chr5	31093263	31093469	-	207	0.44596	2.22702
Ghr	growth hormone receptor [Source:MGI Symbol;Acc:MGI:95708]	chr15:3345227-3346532	ENSMUSG00000055737.12	chr15	3345227	3346532	-	1306	0.445643	1.98549
Mcoln1	mucolipin 1 [Source:MGI Symbol;Acc:MGI:1890498]	chr8:3500495-3503383	ENSMUSG00000004567.16	chr8	3500495	3503383	+	2889	0.445367	2.2476
Reep5	receptor accessory protein 5 [Source:MGI Symbol;Acc:MGI:1270152]	chr18:34373204-34373369	ENSMUSG00000005873.6	chr18	34373204	34373369	-	166	0.443661	3.19227
Apbb2	amyloid beta (A4) precursor protein-binding, family B, member 2 [Source:MGI Symbol;Acc:MGI:108405]	chr5:66540702-66543617	ENSMUSG00000029207.16	chr5	66540702	66543617	-	2916	0.443337	1.27876
Ccdc93	coiled-coil domain containing 93 [Source:MGI Symbol;Acc:MGI:1918079]	chr1:121476032-121476148	ENSMUSG00000026339.18	chr1	121476032	121476148	+	117	0.44328	2.48652
Chchd1	coiled-coil-helix-coiled-coil-helix domain containing 1 [Source:MGI Symbol;Acc:MGI:1913371]	chr14:20703276-20703607	ENSMUSG00000063787.4	chr14	20703276	20703607	+	332	0.441353	3.33059
Uba52	ubiquitin A-52 residue ribosomal protein fusion product 1 [Source:MGI Symbol;Acc:MGI:98887]	chr8:70509521-70509945	ENSMUSG00000090137.8	chr8	70509521	70509945	-	425	0.440693	1.63194
Adam23	a disintegrin and metallopeptidase domain 23 [Source:MGI Symbol;Acc:MGI:1345162]	chr1:63578792-63582179	ENSMUSG00000025964.15	chr1	63578792	63582179	+	3388	0.440375	1.60211
Skp1	S-phase kinase-associated protein 1 [Source:MGI Symbol;Acc:MGI:103575]	chr11:52232189-52232612	ENSMUSG00000036309.14	chr11	52232189	52232612	+	424	0.440047	1.11295
Sqstm1	sequestosome 1 [Source:MGI Symbol;Acc:MGI:107931]	chr11:50205679-50206103	ENSMUSG00000015837.15	chr11	50205679	50206103	-	425	0.438664	1.76691
Pprc1	peroxisome proliferative activated receptor, gamma, coactivator-related 1 [Source:MGI Symbol;Acc:MGI:2385096]	chr19:46056581-46056743	ENSMUSG00000055491.14	chr19	46056581	46056743	+	163	0.437525	1.81539
Cdipt	CDP-diacylglycerol--inositol 3-phosphatidyltransferase (phosphatidylinositol synthase) [Source:MGI Symbol;Acc:MGI:105491]	chr7:126976730-126976806	ENSMUSG00000030682.4	chr7	126976730	126976806	+	77	0.436205	2.64092
Nomo1	nodal modulator 1 [Source:MGI Symbol;Acc:MGI:2385850]	chr7:46060879-46061230	ENSMUSG00000030835.6	chr7	46060879	46061230	+	352	0.436182	2.12935
Rgs17	regulator of G-protein signaling 17 [Source:MGI Symbol;Acc:MGI:1927469]	chr10:5841272-5841506	ENSMUSG00000019775.17	chr10	5841272	5841506	-	235	0.436161	2.59827
Cpne2	copine II [Source:MGI Symbol;Acc:MGI:2387578]	chr8:94562650-94562789	ENSMUSG00000034361.10	chr8	94562650	94562789	+	140	0.435856	1.96125
Aqr	aquarius [Source:MGI Symbol;Acc:MGI:1276102]	chr2:114126956-114127025	ENSMUSG00000040383.16	chr2	114126956	114127025	-	70	0.435644	2.6056
Taf1	TATA-box binding protein associated factor 1 [Source:MGI Symbol;Acc:MGI:1336878]	chrX:101568459-101568557	ENSMUSG00000031314.18	chrX	101568459	101568557	+	99	0.434345	2.82495
Parp11	poly (ADP-ribose) polymerase family, member 11 [Source:MGI Symbol;Acc:MGI:2141505]	chr6:127471527-127473285	ENSMUSG00000037997.12	chr6	127471527	127473285	+	1759	0.433013	1.63602
Ctso	cathepsin O [Source:MGI Symbol;Acc:MGI:2139628]	chr3:81941532-81941637	ENSMUSG00000028015.3	chr3	81941532	81941637	+	106	0.431855	3.28766
Cdipt	CDP-diacylglycerol--inositol 3-phosphatidyltransferase (phosphatidylinositol synthase) [Source:MGI Symbol;Acc:MGI:105491]	chr7:126976588-126976806	ENSMUSG00000030682.4	chr7	126976588	126976806	+	219	0.43131	3.29241
Rusc2	RUN and SH3 domain containing 2 [Source:MGI Symbol;Acc:MGI:2140371]	chr4:43382070-43382199	ENSMUSG00000035969.15	chr4	43382070	43382199	+	130	0.430261	1.78414
Ssbp3	single-stranded DNA binding protein 3 [Source:MGI Symbol;Acc:MGI:1919725]	chr4:107039963-107040657	ENSMUSG00000061887.14	chr4	107039963	107040657	+	695	0.429829	1.69222
Hddc3	HD domain containing 3 [Source:MGI Symbol;Acc:MGI:1915945]	chr7:80343132-80343249	ENSMUSG00000030532.6	chr7	80343132	80343249	+	118	0.42862	2.63537
Tmem14c	transmembrane protein 14C [Source:MGI Symbol;Acc:MGI:1913404]	chr13:41018356-41018457	ENSMUSG00000021361.7	chr13	41018356	41018457	+	102	0.427304	2.6321
Copz2	coatomer protein complex, subunit zeta 2 [Source:MGI Symbol;Acc:MGI:1929008]	chr11:96856672-96856940	ENSMUSG00000018672.15	chr11	96856672	96856940	+	269	0.425923	1.91449
Cacybp	calcyclin binding protein [Source:MGI Symbol;Acc:MGI:1270839]	chr1:160212647-160212805	ENSMUSG00000014226.10	chr1	160212647	160212805	-	159	0.425155	2.54955
Ralyl	RALY RNA binding protein-like [Source:MGI Symbol;Acc:MGI:1924147]	chr3:13471682-13472792	ENSMUSG00000039717.16	chr3	13471682	13472792	+	1111	0.42488	2.01303
Cacybp	calcyclin binding protein [Source:MGI Symbol;Acc:MGI:1270839]	chr1:160212647-160212875	ENSMUSG00000014226.10	chr1	160212647	160212875	-	229	0.424546	2.8859
Mt2	metallothionein 2 [Source:MGI Symbol;Acc:MGI:97172]	chr8:94172860-94172952	ENSMUSG00000031762.7	chr8	94172860	94172952	+	93	0.424411	1.05393
Psme2	proteasome (prosome, macropain) activator subunit 2 (PA28 beta) [Source:MGI Symbol;Acc:MGI:1096365]	chr14:55589481-55589705	ENSMUSG00000079197.10	chr14	55589481	55589705	-	225	0.424238	2.08862
Cdipt	CDP-diacylglycerol--inositol 3-phosphatidyltransferase (phosphatidylinositol synthase) [Source:MGI Symbol;Acc:MGI:105491]	chr7:126976458-126976806	ENSMUSG00000030682.4	chr7	126976458	126976806	+	349	0.423862	3.44187
Ppip5k2	diphosphoinositol pentakisphosphate kinase 2 [Source:MGI Symbol;Acc:MGI:2142810]	chr1:97742171-97745272	ENSMUSG00000040648.14	chr1	97742171	97745272	-	3102	0.423221	1.60311
Myo16	myosin XVI [Source:MGI Symbol;Acc:MGI:2685951]	chr8:10502767-10502939	ENSMUSG00000039057.11	chr8	10502767	10502939	+	173	0.42226	3.56003
Syt5	synaptotagmin V [Source:MGI Symbol;Acc:MGI:1926368]	chr7:4541827-4541944	ENSMUSG00000004961.7	chr7	4541827	4541944	-	118	0.420076	2.78662
Hddc3	HD domain containing 3 [Source:MGI Symbol;Acc:MGI:1915945]	chr7:80343116-80343249	ENSMUSG00000030532.6	chr7	80343116	80343249	+	134	0.419459	2.98909
Hddc3	HD domain containing 3 [Source:MGI Symbol;Acc:MGI:1915945]	chr7:80343121-80343249	ENSMUSG00000030532.6	chr7	80343121	80343249	+	129	0.419459	2.98909
Hddc3	HD domain containing 3 [Source:MGI Symbol;Acc:MGI:1915945]	chr7:80343104-80343249	ENSMUSG00000030532.6	chr7	80343104	80343249	+	146	0.419459	2.98909
Ralb	v-ral simian leukemia viral oncogene B [Source:MGI Symbol;Acc:MGI:1927244]	chr1:119504577-119504794	ENSMUSG00000004451.14	chr1	119504577	119504794	-	218	0.419437	1.7799
Nln	neurolysin (metallopeptidase M3 family) [Source:MGI Symbol;Acc:MGI:1923055]	chr13:104109416-104109586	ENSMUSG00000021710.11	chr13	104109416	104109586	-	171	0.418848	2.52911
Nln	neurolysin (metallopeptidase M3 family) [Source:MGI Symbol;Acc:MGI:1923055]	chr13:104109416-104109614	ENSMUSG00000021710.11	chr13	104109416	104109614	-	199	0.418848	2.52911
Rnf169	ring finger protein 169 [Source:MGI Symbol;Acc:MGI:1920257]	chr7:99979972-99980448	ENSMUSG00000058761.5	chr7	99979972	99980448	-	477	0.418774	3.28811
Cacybp	calcyclin binding protein [Source:MGI Symbol;Acc:MGI:1270839]	chr1:160212647-160212726	ENSMUSG00000014226.10	chr1	160212647	160212726	-	80	0.418701	2.67037
Tdg	thymine DNA glycosylase [Source:MGI Symbol;Acc:MGI:108247]	chr10:82644024-82644305	ENSMUSG00000034674.18	chr10	82644024	82644305	+	282	0.417892	2.34383
Cntrob	centrobin, centrosomal BRCA2 interacting protein [Source:MGI Symbol;Acc:MGI:2443290]	chr11:69301517-69302966	ENSMUSG00000032782.19	chr11	69301517	69302966	-	1450	0.416046	1.85302
Scaf8	SR-related CTD-associated factor 8 [Source:MGI Symbol;Acc:MGI:1925212]	chr17:3167963-3168139	ENSMUSG00000046201.9	chr17	3167963	3168139	+	177	0.414805	2.79865
Dstn	destrin [Source:MGI Symbol;Acc:MGI:1929270]	chr2:143915320-143915647	ENSMUSG00000015932.8	chr2	143915320	143915647	+	328	0.412081	2.40181
Gpat4	glycerol-3-phosphate acyltransferase 4 [Source:MGI Symbol;Acc:MGI:2142716]	chr8:23175340-23175419	ENSMUSG00000031545.6	chr8	23175340	23175419	-	80	0.412036	3.61376
Ncapd2	non-SMC condensin I complex, subunit D2 [Source:MGI Symbol;Acc:MGI:1915548]	chr6:125168863-125168989	ENSMUSG00000038252.13	chr6	125168863	125168989	-	127	0.411983	2.86671
Cox7c	cytochrome c oxidase subunit 7C [Source:MGI Symbol;Acc:MGI:103226]	chr13:86046601-86046904	ENSMUSG00000017778.14	chr13	86046601	86046904	-	304	0.409701	1.6603
Slc25a19	solute carrier family 25 (mitochondrial thiamine pyrophosphate carrier), member 19 [Source:MGI Symbol;Acc:MGI:1914533]	chr11:115628065-115628281	ENSMUSG00000020744.13	chr11	115628065	115628281	-	217	0.40929	3.48301
Slc25a19	solute carrier family 25 (mitochondrial thiamine pyrophosphate carrier), member 19 [Source:MGI Symbol;Acc:MGI:1914533]	chr11:115628065-115628295	ENSMUSG00000020744.13	chr11	115628065	115628295	-	231	0.40929	3.48301
Satb2	special AT-rich sequence binding protein 2 [Source:MGI Symbol;Acc:MGI:2679336]	chr1:56871312-56871784	ENSMUSG00000038331.15	chr1	56871312	56871784	-	473	0.408913	2.30587
Cdipt	CDP-diacylglycerol--inositol 3-phosphatidyltransferase (phosphatidylinositol synthase) [Source:MGI Symbol;Acc:MGI:105491]	chr7:126976436-126976806	ENSMUSG00000030682.4	chr7	126976436	126976806	+	371	0.408323	3.97505
Phc2	polyhomeotic 2 [Source:MGI Symbol;Acc:MGI:1860454]	chr4:128707937-128708095	ENSMUSG00000028796.17	chr4	128707937	128708095	+	159	0.408268	2.32709
Itfg1	integrin alpha FG-GAP repeat containing 1 [Source:MGI Symbol;Acc:MGI:106419]	chr8:85726166-85727710	ENSMUSG00000031703.8	chr8	85726166	85727710	-	1545	0.407827	3.42232
Psen2	presenilin 2 [Source:MGI Symbol;Acc:MGI:109284]	chr1:180228843-180229568	ENSMUSG00000010609.15	chr1	180228843	180229568	-	726	0.40776	2.42311
Tcf4	transcription factor 4 [Source:MGI Symbol;Acc:MGI:98506]	chr18:69593427-69597445	ENSMUSG00000053477.17	chr18	69593427	69597445	+	4019	0.407709	1.69296
Itfg1	integrin alpha FG-GAP repeat containing 1 [Source:MGI Symbol;Acc:MGI:106419]	chr8:85726166-85726290	ENSMUSG00000031703.8	chr8	85726166	85726290	-	125	0.407663	4.06406
Bicd2	BICD cargo adaptor 2 [Source:MGI Symbol;Acc:MGI:1924145]	chr13:49383043-49383253	ENSMUSG00000037933.16	chr13	49383043	49383253	+	211	0.407277	2.49557
Coq9	coenzyme Q9 [Source:MGI Symbol;Acc:MGI:1915164]	chr8:94851717-94851955	ENSMUSG00000031782.15	chr8	94851717	94851955	+	239	0.406925	2.48752
Ccdc191	coiled-coil domain containing 191 [Source:MGI Symbol;Acc:MGI:1922661]	chr16:43938914-43939163	ENSMUSG00000022701.18	chr16	43938914	43939163	+	250	0.406584	2.97075
Ccdc191	coiled-coil domain containing 191 [Source:MGI Symbol;Acc:MGI:1922661]	chr16:43939003-43939163	ENSMUSG00000022701.18	chr16	43939003	43939163	+	161	0.406584	2.97075
Fam219b	family with sequence similarity 219, member B [Source:MGI Symbol;Acc:MGI:1925573]	chr9:57537617-57537834	ENSMUSG00000032305.15	chr9	57537617	57537834	+	218	0.406581	2.67445
Fam219b	family with sequence similarity 219, member B [Source:MGI Symbol;Acc:MGI:1925573]	chr9:57537563-57537834	ENSMUSG00000032305.15	chr9	57537563	57537834	+	272	0.406491	2.41405
Fam219b	family with sequence similarity 219, member B [Source:MGI Symbol;Acc:MGI:1925573]	chr9:57537528-57537834	ENSMUSG00000032305.15	chr9	57537528	57537834	+	307	0.406491	2.41405
Hoga1	4-hydroxy-2-oxoglutarate aldolase 1 [Source:MGI Symbol;Acc:MGI:1914682]	chr19:42070188-42070953	ENSMUSG00000025176.14	chr19	42070188	42070953	+	766	0.406038	2.7281
Cdk10	cyclin-dependent kinase 10 [Source:MGI Symbol;Acc:MGI:2448549]	chr8:123224887-123224968	ENSMUSG00000033862.7	chr8	123224887	123224968	+	82	0.405901	2.64591
Cdk10	cyclin-dependent kinase 10 [Source:MGI Symbol;Acc:MGI:2448549]	chr8:123224872-123224968	ENSMUSG00000033862.7	chr8	123224872	123224968	+	97	0.405901	2.64591
Cdk10	cyclin-dependent kinase 10 [Source:MGI Symbol;Acc:MGI:2448549]	chr8:123224870-123224968	ENSMUSG00000033862.7	chr8	123224870	123224968	+	99	0.405901	2.64591
Rgma	repulsive guidance molecule family member A [Source:MGI Symbol;Acc:MGI:2679262]	chr7:73391276-73393247	ENSMUSG00000070509.15	chr7	73391276	73393247	+	1972	0.405657	2.8459
Tk2	thymidine kinase 2, mitochondrial [Source:MGI Symbol;Acc:MGI:1913266]	chr8:104231160-104231634	ENSMUSG00000035824.7	chr8	104231160	104231634	-	475	0.405581	1.83234
Sik2	salt inducible kinase 2 [Source:MGI Symbol;Acc:MGI:2445031]	chr9:51008741-51009073	ENSMUSG00000037112.16	chr9	51008741	51009073	-	333	0.405123	3.19198
Uba3	ubiquitin-like modifier activating enzyme 3 [Source:MGI Symbol;Acc:MGI:1341217]	chr6:97203014-97203594	ENSMUSG00000030061.16	chr6	97203014	97203594	-	581	0.40478	1.73595
Pbrm1	polybromo 1 [Source:MGI Symbol;Acc:MGI:1923998]	chr14:31087516-31088040	ENSMUSG00000042323.17	chr14	31087516	31088040	+	525	0.404127	2.31714
Fads3	fatty acid desaturase 3 [Source:MGI Symbol;Acc:MGI:1928740]	chr19:10054606-10054666	ENSMUSG00000024664.5	chr19	10054606	10054666	+	61	0.402515	2.82978
Tceal8	transcription elongation factor A (SII)-like 8 [Source:MGI Symbol;Acc:MGI:1913934]	chrX:136171420-136171705	ENSMUSG00000051579.10	chrX	136171420	136171705	-	286	0.402239	2.00968
Cdip1	cell death inducing Trp53 target 1 [Source:MGI Symbol;Acc:MGI:1913876]	chr16:4785483-4789935	ENSMUSG00000004071.13	chr16	4785483	4789935	-	4453	0.401341	1.12957
Zranb1	zinc finger, RAN-binding domain containing 1 [Source:MGI Symbol;Acc:MGI:106441]	chr7:132980859-132981401	ENSMUSG00000030967.15	chr7	132980859	132981401	+	543	0.401255	2.16297
Pex5	peroxisomal biogenesis factor 5 [Source:MGI Symbol;Acc:MGI:1098808]	chr6:124399859-124399929	ENSMUSG00000005069.12	chr6	124399859	124399929	-	71	0.401082	2.07487
Usp20	ubiquitin specific peptidase 20 [Source:MGI Symbol;Acc:MGI:1921520]	chr2:31006995-31007592	ENSMUSG00000026854.16	chr2	31006995	31007592	+	598	0.400653	0.998073
Hsp90ab1	heat shock protein 90 alpha (cytosolic), class B member 1 [Source:MGI Symbol;Acc:MGI:96247]	chr17:45573167-45573255	ENSMUSG00000023944.14	chr17	45573167	45573255	-	89	0.399449	0.943379
Slc6a8	solute carrier family 6 (neurotransmitter transporter, creatine), member 8 [Source:MGI Symbol;Acc:MGI:2147834]	chrX:73680132-73680234	ENSMUSG00000019558.14	chrX	73680132	73680234	+	103	0.398654	2.14966
Sik2	salt inducible kinase 2 [Source:MGI Symbol;Acc:MGI:2445031]	chr9:51008741-51008936	ENSMUSG00000037112.16	chr9	51008741	51008936	-	196	0.398652	2.70987
Sik2	salt inducible kinase 2 [Source:MGI Symbol;Acc:MGI:2445031]	chr9:51008741-51009000	ENSMUSG00000037112.16	chr9	51008741	51009000	-	260	0.398204	3.17703
Sik2	salt inducible kinase 2 [Source:MGI Symbol;Acc:MGI:2445031]	chr9:51008741-51008984	ENSMUSG00000037112.16	chr9	51008741	51008984	-	244	0.398204	3.17703
Sik2	salt inducible kinase 2 [Source:MGI Symbol;Acc:MGI:2445031]	chr9:51008741-51009011	ENSMUSG00000037112.16	chr9	51008741	51009011	-	271	0.398204	3.17703
Sik2	salt inducible kinase 2 [Source:MGI Symbol;Acc:MGI:2445031]	chr9:51008741-51009026	ENSMUSG00000037112.16	chr9	51008741	51009026	-	286	0.398204	3.17703
Bicd2	BICD cargo adaptor 2 [Source:MGI Symbol;Acc:MGI:1924145]	chr13:49383089-49383253	ENSMUSG00000037933.16	chr13	49383089	49383253	+	165	0.398123	2.49182
Rusc2	RUN and SH3 domain containing 2 [Source:MGI Symbol;Acc:MGI:2140371]	chr4:43382057-43382199	ENSMUSG00000035969.15	chr4	43382057	43382199	+	143	0.398118	1.94477
Rusc2	RUN and SH3 domain containing 2 [Source:MGI Symbol;Acc:MGI:2140371]	chr4:43381979-43382199	ENSMUSG00000035969.15	chr4	43381979	43382199	+	221	0.397641	1.26982
Cdipt	CDP-diacylglycerol--inositol 3-phosphatidyltransferase (phosphatidylinositol synthase) [Source:MGI Symbol;Acc:MGI:105491]	chr7:126976378-126976806	ENSMUSG00000030682.4	chr7	126976378	126976806	+	429	0.397437	2.70514
Apoe	apolipoprotein E [Source:MGI Symbol;Acc:MGI:88057]	chr7:19699011-19699188	ENSMUSG00000002985.16	chr7	19699011	19699188	-	178	0.397271	0.262867
Plekha3	pleckstrin homology domain-containing, family A (phosphoinositide binding specific) member 3 [Source:MGI Symbol;Acc:MGI:1932515]	chr2:76675281-76675634	ENSMUSG00000002733.8	chr2	76675281	76675634	+	354	0.396448	1.88266
Phospho2	phosphatase, orphan 2 [Source:MGI Symbol;Acc:MGI:1920623]	chr2:69790972-69792491	ENSMUSG00000027088.10	chr2	69790972	69792491	+	1520	0.396431	1.58795
Mapk1	mitogen-activated protein kinase 1 [Source:MGI Symbol;Acc:MGI:1346858]	chr16:17038314-17038434	ENSMUSG00000063358.17	chr16	17038314	17038434	+	121	0.396112	3.12654
Itprid2	ITPR interacting domain containing 2 [Source:MGI Symbol;Acc:MGI:1917849]	chr2:79660854-79661004	ENSMUSG00000027007.16	chr2	79660854	79661004	+	151	0.395946	3.05799
Ift140	intraflagellar transport 140 [Source:MGI Symbol;Acc:MGI:2146906]	chr17:25028804-25028979	ENSMUSG00000024169.16	chr17	25028804	25028979	+	176	0.394929	2.96818
Ndufa9	NADH:ubiquinone oxidoreductase subunit A9 [Source:MGI Symbol;Acc:MGI:1913358]	chr6:126832472-126832548	ENSMUSG00000000399.10	chr6	126832472	126832548	-	77	0.393466	4.40449
Nln	neurolysin (metallopeptidase M3 family) [Source:MGI Symbol;Acc:MGI:1923055]	chr13:104108383-104109595	ENSMUSG00000021710.11	chr13	104108383	104109595	-	1213	0.393166	1.59437
Ubap2l	ubiquitin-associated protein 2-like [Source:MGI Symbol;Acc:MGI:1921633]	chr3:90001818-90001868	ENSMUSG00000042520.16	chr3	90001818	90001868	-	51	0.392904	2.74157
Camk2b	calcium/calmodulin-dependent protein kinase II, beta [Source:MGI Symbol;Acc:MGI:88257]	chr11:5983668-5984138	ENSMUSG00000057897.14	chr11	5983668	5984138	-	471	0.392282	1.34764
Paxx	non-homologous end joining factor [Source:MGI Symbol;Acc:MGI:2442831]	chr2:25460259-25460357	ENSMUSG00000047617.11	chr2	25460259	25460357	-	99	0.392031	2.97921
Palm	paralemmin [Source:MGI Symbol;Acc:MGI:1261814]	chr10:79793667-79793740	ENSMUSG00000035863.14	chr10	79793667	79793740	+	74	0.391696	2.24419
Cdip1	cell death inducing Trp53 target 1 [Source:MGI Symbol;Acc:MGI:1913876]	chr16:4789831-4789990	ENSMUSG00000004071.13	chr16	4789831	4789990	-	160	0.391232	1.84136
Cox5b	cytochrome c oxidase subunit 5B [Source:MGI Symbol;Acc:MGI:88475]	chr1:36691628-36692284	ENSMUSG00000061518.11	chr1	36691628	36692284	+	657	0.391209	2.58353
Hsp90ab1	heat shock protein 90 alpha (cytosolic), class B member 1 [Source:MGI Symbol;Acc:MGI:96247]	chr17:45573167-45573271	ENSMUSG00000023944.14	chr17	45573167	45573271	-	105	0.391085	0.925972
Sik2	salt inducible kinase 2 [Source:MGI Symbol;Acc:MGI:2445031]	chr9:51008741-51008973	ENSMUSG00000037112.16	chr9	51008741	51008973	-	233	0.391079	3.16136
Arf5	ADP-ribosylation factor 5 [Source:MGI Symbol;Acc:MGI:99434]	chr6:28423560-28423755	ENSMUSG00000020440.13	chr6	28423560	28423755	+	196	0.390717	2.39555
Cdipt	CDP-diacylglycerol--inositol 3-phosphatidyltransferase (phosphatidylinositol synthase) [Source:MGI Symbol;Acc:MGI:105491]	chr7:126975914-126976806	ENSMUSG00000030682.4	chr7	126975914	126976806	+	893	0.390405	2.41878
Anxa7	annexin A7 [Source:MGI Symbol;Acc:MGI:88031]	chr14:20460159-20460234	ENSMUSG00000021814.17	chr14	20460159	20460234	-	76	0.389777	3.09928
Rnf216	ring finger protein 216 [Source:MGI Symbol;Acc:MGI:1344349]	chr5:143077427-143077477	ENSMUSG00000045078.12	chr5	143077427	143077477	-	51	0.388046	2.9105
Axl	AXL receptor tyrosine kinase [Source:MGI Symbol;Acc:MGI:1347244]	chr7:25788415-25788700	ENSMUSG00000002602.16	chr7	25788415	25788700	-	286	0.38758	2.00571
Axl	AXL receptor tyrosine kinase [Source:MGI Symbol;Acc:MGI:1347244]	chr7:25788415-25788687	ENSMUSG00000002602.16	chr7	25788415	25788687	-	273	0.38758	2.00571
Axl	AXL receptor tyrosine kinase [Source:MGI Symbol;Acc:MGI:1347244]	chr7:25788415-25788705	ENSMUSG00000002602.16	chr7	25788415	25788705	-	291	0.38758	2.00571
Auts2	autism susceptibility candidate 2 [Source:MGI Symbol;Acc:MGI:1919847]	chr5:132025003-132028626	ENSMUSG00000029673.17	chr5	132025003	132028626	-	3624	0.387232	1.10989
Palm	paralemmin [Source:MGI Symbol;Acc:MGI:1261814]	chr10:79793572-79793740	ENSMUSG00000035863.14	chr10	79793572	79793740	+	169	0.386107	3.17955
Mapk1	mitogen-activated protein kinase 1 [Source:MGI Symbol;Acc:MGI:1346858]	chr16:17038314-17038439	ENSMUSG00000063358.17	chr16	17038314	17038439	+	126	0.385718	3.1416
Gstp1	glutathione S-transferase, pi 1 [Source:MGI Symbol;Acc:MGI:95865]	chr19:4037290-4037877	ENSMUSG00000060803.6	chr19	4037290	4037877	-	588	0.385556	2.08344
Ccnh	cyclin H [Source:MGI Symbol;Acc:MGI:1913921]	chr13:85190754-85190876	ENSMUSG00000021548.10	chr13	85190754	85190876	+	123	0.385149	2.76721
Ubxn6	UBX domain protein 6 [Source:MGI Symbol;Acc:MGI:1913780]	chr17:56068536-56069108	ENSMUSG00000019578.11	chr17	56068536	56069108	-	573	0.384712	2.33528
Slc30a10	solute carrier family 30, member 10 [Source:MGI Symbol;Acc:MGI:2685058]	chr1:185454848-185456429	ENSMUSG00000026614.7	chr1	185454848	185456429	+	1582	0.38438	2.23617
Arhgap33	Rho GTPase activating protein 33 [Source:MGI Symbol;Acc:MGI:2673998]	chr7:30525955-30526029	ENSMUSG00000036882.7	chr7	30525955	30526029	-	75	0.384306	1.55459
Crem	cAMP responsive element modulator [Source:MGI Symbol;Acc:MGI:88495]	chr18:3294184-3295182	ENSMUSG00000063889.16	chr18	3294184	3295182	-	999	0.383879	2.26132
Aldoa	aldolase A, fructose-bisphosphate [Source:MGI Symbol;Acc:MGI:87994]	chr7:126798823-126798993	ENSMUSG00000030695.16	chr7	126798823	126798993	-	171	0.383643	0.846497
Wdr6	WD repeat domain 6 [Source:MGI Symbol;Acc:MGI:1930140]	chr9:108573905-108574000	ENSMUSG00000066357.6	chr9	108573905	108574000	-	96	0.383424	2.3143
Smarcc1	SWI/SNF related, matrix associated, actin dependent regulator of chromatin, subfamily c, member 1 [Source:MGI Symbol;Acc:MGI:1203524]	chr9:110190903-110190962	ENSMUSG00000032481.17	chr9	110190903	110190962	+	60	0.383366	2.44625
Polr3d	polymerase (RNA) III (DNA directed) polypeptide D [Source:MGI Symbol;Acc:MGI:1914315]	chr14:70441304-70441717	ENSMUSG00000000776.13	chr14	70441304	70441717	-	414	0.383299	2.37227
Mon2	MON2 homolog, regulator of endosome to Golgi trafficking [Source:MGI Symbol;Acc:MGI:1914324]	chr10:123024768-123026170	ENSMUSG00000034602.15	chr10	123024768	123026170	-	1403	0.382565	1.77636
Cdk10	cyclin-dependent kinase 10 [Source:MGI Symbol;Acc:MGI:2448549]	chr8:123224842-123224968	ENSMUSG00000033862.7	chr8	123224842	123224968	+	127	0.382438	1.95086
Sae1	SUMO1 activating enzyme subunit 1 [Source:MGI Symbol;Acc:MGI:1929264]	chr7:16320234-16320880	ENSMUSG00000052833.9	chr7	16320234	16320880	-	647	0.381453	2.26882
Tlk1	tousled-like kinase 1 [Source:MGI Symbol;Acc:MGI:2441683]	chr2:70825193-70825728	ENSMUSG00000041997.16	chr2	70825193	70825728	-	536	0.380406	2.38395
Plekhm2	pleckstrin homology domain containing, family M (with RUN domain) member 2 [Source:MGI Symbol;Acc:MGI:1916832]	chr4:141630447-141630660	ENSMUSG00000028917.14	chr4	141630447	141630660	-	214	0.379405	2.47105
Gnai2	guanine nucleotide binding protein (G protein), alpha inhibiting 2 [Source:MGI Symbol;Acc:MGI:95772]	chr9:107635286-107635343	ENSMUSG00000032562.13	chr9	107635286	107635343	-	58	0.379148	1.65368
Dtnb	dystrobrevin, beta [Source:MGI Symbol;Acc:MGI:1203728]	chr12:3718412-3718968	ENSMUSG00000071454.13	chr12	3718412	3718968	+	557	0.379103	2.03937
Polr3d	polymerase (RNA) III (DNA directed) polypeptide D [Source:MGI Symbol;Acc:MGI:1914315]	chr14:70441304-70441455	ENSMUSG00000000776.13	chr14	70441304	70441455	-	152	0.377672	2.7381
Hdac1	histone deacetylase 1 [Source:MGI Symbol;Acc:MGI:108086]	chr4:129522363-129522790	ENSMUSG00000028800.15	chr4	129522363	129522790	-	428	0.377574	2.0637
Hnmt	histamine N-methyltransferase [Source:MGI Symbol;Acc:MGI:2153181]	chr2:24019102-24019209	ENSMUSG00000026986.14	chr2	24019102	24019209	-	108	0.377352	3.01462
Esd	esterase D/formylglutathione hydrolase [Source:MGI Symbol;Acc:MGI:95421]	chr14:74743219-74743547	ENSMUSG00000021996.16	chr14	74743219	74743547	+	329	0.376747	1.81436
Flii	flightless I actin binding protein [Source:MGI Symbol;Acc:MGI:1342286]	chr11:60715461-60715589	ENSMUSG00000002812.4	chr11	60715461	60715589	-	129	0.37673	4.29942
Cyrib	CYFIP related Rac1 interactor B [Source:MGI Symbol;Acc:MGI:1923520]	chr15:63956328-63961543	ENSMUSG00000022378.14	chr15	63956328	63961543	-	5216	0.375601	1.87754
Chchd3	coiled-coil-helix-coiled-coil-helix domain containing 3 [Source:MGI Symbol;Acc:MGI:1913325]	chr6:32851443-32852215	ENSMUSG00000053768.13	chr6	32851443	32852215	-	773	0.375347	2.342
Cul4a	cullin 4A [Source:MGI Symbol;Acc:MGI:1914487]	chr8:13127710-13127777	ENSMUSG00000031446.14	chr8	13127710	13127777	+	68	0.375269	3.43235
Vma21	VMA21 vacuolar H+-ATPase homolog (S. cerevisiae) [Source:MGI Symbol;Acc:MGI:1914298]	chrX:71837578-71839757	ENSMUSG00000073131.12	chrX	71837578	71839757	+	2180	0.375245	0.796208
Nck2	non-catalytic region of tyrosine kinase adaptor protein 2 [Source:MGI Symbol;Acc:MGI:1306821]	chr1:43509621-43509783	ENSMUSG00000066877.11	chr1	43509621	43509783	+	163	0.373775	2.503
Usp19	ubiquitin specific peptidase 19 [Source:MGI Symbol;Acc:MGI:1918722]	chr9:108490602-108490895	ENSMUSG00000006676.16	chr9	108490602	108490895	+	294	0.373747	1.63114
Cbs	cystathionine beta-synthase [Source:MGI Symbol;Acc:MGI:88285]	chr17:31617388-31617462	ENSMUSG00000024039.15	chr17	31617388	31617462	-	75	0.372944	2.9906
Pdlim4	PDZ and LIM domain 4 [Source:MGI Symbol;Acc:MGI:1353470]	chr11:54068840-54069014	ENSMUSG00000020388.12	chr11	54068840	54069014	-	175	0.372436	2.23244
Pdlim4	PDZ and LIM domain 4 [Source:MGI Symbol;Acc:MGI:1353470]	chr11:54068840-54068991	ENSMUSG00000020388.12	chr11	54068840	54068991	-	152	0.372436	2.23244
Dtnb	dystrobrevin, beta [Source:MGI Symbol;Acc:MGI:1203728]	chr12:3718412-3721089	ENSMUSG00000071454.13	chr12	3718412	3721089	+	2678	0.37109	1.4269
Amacr	alpha-methylacyl-CoA racemase [Source:MGI Symbol;Acc:MGI:1098273]	chr15:10981756-10982053	ENSMUSG00000022244.7	chr15	10981756	10982053	+	298	0.370319	2.25059
Hspa8	heat shock protein 8 [Source:MGI Symbol;Acc:MGI:105384]	chr9:40801918-40802127	ENSMUSG00000015656.17	chr9	40801918	40802127	+	210	0.369429	0.861166
Ap2a1	adaptor-related protein complex 2, alpha 1 subunit [Source:MGI Symbol;Acc:MGI:101921]	chr7:44902974-44903056	ENSMUSG00000060279.14	chr7	44902974	44903056	-	83	0.369174	2.60036
Ccdc59	coiled-coil domain containing 59 [Source:MGI Symbol;Acc:MGI:1289302]	chr10:105841067-105841655	ENSMUSG00000019897.8	chr10	105841067	105841655	+	589	0.369084	2.08101
Man2c1	mannosidase, alpha, class 2C, member 1 [Source:MGI Symbol;Acc:MGI:1920994]	chr9:57137282-57137374	ENSMUSG00000032295.15	chr9	57137282	57137374	+	93	0.368761	1.89483
Wdr47	WD repeat domain 47 [Source:MGI Symbol;Acc:MGI:2139593]	chr3:108633061-108633138	ENSMUSG00000040389.15	chr3	108633061	108633138	+	78	0.366432	2.196
Ctbp2	C-terminal binding protein 2 [Source:MGI Symbol;Acc:MGI:1201686]	chr7:133081517-133081860	ENSMUSG00000030970.16	chr7	133081517	133081860	-	344	0.366196	2.09857
Ruvbl2	RuvB-like protein 2 [Source:MGI Symbol;Acc:MGI:1342299]	chr7:45422534-45422807	ENSMUSG00000003868.14	chr7	45422534	45422807	-	274	0.365883	2.4219
Phc2	polyhomeotic 2 [Source:MGI Symbol;Acc:MGI:1860454]	chr4:128710164-128711144	ENSMUSG00000028796.17	chr4	128710164	128711144	+	981	0.365554	0.971758
Ftl1	ferritin light polypeptide 1 [Source:MGI Symbol;Acc:MGI:95589]	chr7:45459324-45459421	ENSMUSG00000050708.16	chr7	45459324	45459421	-	98	0.365538	1.01613
Adam8	a disintegrin and metallopeptidase domain 8 [Source:MGI Symbol;Acc:MGI:107825]	chr7:139979960-139980034	ENSMUSG00000025473.16	chr7	139979960	139980034	-	75	0.364463	2.59165
Hsp90ab1	heat shock protein 90 alpha (cytosolic), class B member 1 [Source:MGI Symbol;Acc:MGI:96247]	chr17:45573167-45573253	ENSMUSG00000023944.14	chr17	45573167	45573253	-	87	0.363138	0.875289
Nrxn3	neurexin III [Source:MGI Symbol;Acc:MGI:1096389]	chr12:90168920-90169091	ENSMUSG00000066392.12	chr12	90168920	90169091	+	172	0.361793	3.54448
Sorcs2	sortilin-related VPS10 domain containing receptor 2 [Source:MGI Symbol;Acc:MGI:1932289]	chr5:36024567-36024666	ENSMUSG00000029093.14	chr5	36024567	36024666	-	100	0.361286	2.63932
Dctn3	dynactin 3 [Source:MGI Symbol;Acc:MGI:1859251]	chr4:41716396-41716454	ENSMUSG00000028447.11	chr4	41716396	41716454	-	59	0.36102	2.11379
Ino80dos	INO80 complex subunit D, opposite strand [Source:MGI Symbol;Acc:MGI:3651861]	chr1:63114096-63115331	ENSMUSG00000084799.7	chr1	63114096	63115331	+	1236	0.360604	1.78416
Fermt2	fermitin family member 2 [Source:MGI Symbol;Acc:MGI:2385001]	chr14:45529425-45529786	ENSMUSG00000037712.16	chr14	45529425	45529786	-	362	0.360233	2.10036
Decr2	2-4-dienoyl-Coenzyme A reductase 2, peroxisomal [Source:MGI Symbol;Acc:MGI:1347059]	chr17:26083845-26084135	ENSMUSG00000036775.13	chr17	26083845	26084135	-	291	0.360039	3.0756
Slc9a8	solute carrier family 9 (sodium/hydrogen exchanger), member 8 [Source:MGI Symbol;Acc:MGI:1924281]	chr2:167424119-167426134	ENSMUSG00000039463.14	chr2	167424119	167426134	+	2016	0.35937	1.63578
Pkn2	protein kinase N2 [Source:MGI Symbol;Acc:MGI:109211]	chr3:142852944-142855735	ENSMUSG00000004591.16	chr3	142852944	142855735	-	2792	0.358757	1.97432
Eif4g1	eukaryotic translation initiation factor 4, gamma 1 [Source:MGI Symbol;Acc:MGI:2384784]	chr16:20684022-20684239	ENSMUSG00000045983.16	chr16	20684022	20684239	+	218	0.358452	1.80038
Atg13	autophagy related 13 [Source:MGI Symbol;Acc:MGI:1196429]	chr2:91679313-91679695	ENSMUSG00000027244.14	chr2	91679313	91679695	-	383	0.357681	2.44656
Elof1	ELF1 homolog, elongation factor 1 [Source:MGI Symbol;Acc:MGI:1913376]	chr9:22116655-22117086	ENSMUSG00000013822.7	chr9	22116655	22117086	-	432	0.357602	1.6226
Glud1	glutamate dehydrogenase 1 [Source:MGI Symbol;Acc:MGI:95753]	chr14:34328662-34329383	ENSMUSG00000021794.16	chr14	34328662	34329383	+	722	0.357419	1.62864
Slc16a11	solute carrier family 16 (monocarboxylic acid transporters), member 11 [Source:MGI Symbol;Acc:MGI:2663709]	chr11:70215284-70215532	ENSMUSG00000040938.16	chr11	70215284	70215532	+	249	0.356452	2.4079
Qpct	glutaminyl-peptide cyclotransferase (glutaminyl cyclase) [Source:MGI Symbol;Acc:MGI:1917786]	chr17:79077002-79077658	ENSMUSG00000024084.8	chr17	79077002	79077658	+	657	0.356349	1.82752
Inppl1	inositol polyphosphate phosphatase-like 1 [Source:MGI Symbol;Acc:MGI:1333787]	chr7:101829154-101829266	ENSMUSG00000032737.13	chr7	101829154	101829266	-	113	0.355567	2.48297
Tra2a	transformer 2 alpha [Source:MGI Symbol;Acc:MGI:1933972]	chr6:49248986-49249174	ENSMUSG00000029817.11	chr6	49248986	49249174	-	189	0.355389	3.65807
Kcnq5	potassium voltage-gated channel, subfamily Q, member 5 [Source:MGI Symbol;Acc:MGI:1924937]	chr1:21961181-21961581	ENSMUSG00000028033.16	chr1	21961181	21961581	-	401	0.354347	1.88269
Kif2a	kinesin family member 2A [Source:MGI Symbol;Acc:MGI:108390]	chr13:106978972-106979035	ENSMUSG00000021693.20	chr13	106978972	106979035	-	64	0.353953	3.4062
Wnk1	WNK lysine deficient protein kinase 1 [Source:MGI Symbol;Acc:MGI:2442092]	chr6:119930772-119933836	ENSMUSG00000045962.16	chr6	119930772	119933836	-	3065	0.352973	1.87992
Tcerg1	transcription elongation regulator 1 (CA150) [Source:MGI Symbol;Acc:MGI:1926421]	chr18:42552842-42553497	ENSMUSG00000024498.16	chr18	42552842	42553497	+	656	0.351643	2.29925
Rpl41	ribosomal protein L41 [Source:MGI Symbol;Acc:MGI:1915195]	chr10:128549088-128549112	ENSMUSG00000093674.7	chr10	128549088	128549112	-	25	0.351379	0.624761
Crem	cAMP responsive element modulator [Source:MGI Symbol;Acc:MGI:88495]	chr18:3294482-3295182	ENSMUSG00000063889.16	chr18	3294482	3295182	-	701	0.350893	2.18398
Adgrb1	adhesion G protein-coupled receptor B1 [Source:MGI Symbol;Acc:MGI:1933736]	chr15:74550014-74550057	ENSMUSG00000034730.17	chr15	74550014	74550057	+	44	0.349288	1.60533
Grip2	glutamate receptor interacting protein 2 [Source:MGI Symbol;Acc:MGI:2681173]	chr6:91772633-91773017	ENSMUSG00000030098.15	chr6	91772633	91773017	-	385	0.34854	2.74382
Dctn6	dynactin 6 [Source:MGI Symbol;Acc:MGI:1343154]	chr8:34108419-34108796	ENSMUSG00000031516.11	chr8	34108419	34108796	-	378	0.347861	0.612847
Rnft1	ring finger protein, transmembrane 1 [Source:MGI Symbol;Acc:MGI:1924142]	chr11:86490358-86490511	ENSMUSG00000020521.7	chr11	86490358	86490511	+	154	0.34785	4.09262
Med24	mediator complex subunit 24 [Source:MGI Symbol;Acc:MGI:1344385]	chr11:98707266-98707299	ENSMUSG00000017210.14	chr11	98707266	98707299	-	34	0.346245	3.92283
Magi3	membrane associated guanylate kinase, WW and PDZ domain containing 3 [Source:MGI Symbol;Acc:MGI:1923484]	chr3:104027798-104027983	ENSMUSG00000052539.15	chr3	104027798	104027983	-	186	0.345816	2.65044
Gaa	glucosidase, alpha, acid [Source:MGI Symbol;Acc:MGI:95609]	chr11:119277501-119277614	ENSMUSG00000025579.14	chr11	119277501	119277614	+	114	0.345592	2.46691
Ltbp3	latent transforming growth factor beta binding protein 3 [Source:MGI Symbol;Acc:MGI:1101355]	chr19:5746643-5746735	ENSMUSG00000024940.11	chr19	5746643	5746735	+	93	0.344191	2.32017
Dyrk1b	dual-specificity tyrosine-(Y)-phosphorylation regulated kinase 1b [Source:MGI Symbol;Acc:MGI:1330302]	chr7:28185068-28185214	ENSMUSG00000002409.18	chr7	28185068	28185214	+	147	0.343351	2.21407
Mapk1	mitogen-activated protein kinase 1 [Source:MGI Symbol;Acc:MGI:1346858]	chr16:17038314-17038705	ENSMUSG00000063358.17	chr16	17038314	17038705	+	392	0.342687	3.32299
Ociad2	OCIA domain containing 2 [Source:MGI Symbol;Acc:MGI:1916377]	chr5:73338531-73338951	ENSMUSG00000029153.11	chr5	73338531	73338951	-	421	0.342535	1.86793
Ociad2	OCIA domain containing 2 [Source:MGI Symbol;Acc:MGI:1916377]	chr5:73338531-73338948	ENSMUSG00000029153.11	chr5	73338531	73338948	-	418	0.342535	1.86793
Polr2m	polymerase (RNA) II (DNA directed) polypeptide M [Source:MGI Symbol;Acc:MGI:107282]	chr9:71484735-71484958	ENSMUSG00000032199.13	chr9	71484735	71484958	-	224	0.341937	1.36368
Ociad2	OCIA domain containing 2 [Source:MGI Symbol;Acc:MGI:1916377]	chr5:73338531-73338992	ENSMUSG00000029153.11	chr5	73338531	73338992	-	462	0.341281	1.75024
Pcdhgb8	protocadherin gamma subfamily B, 8 [Source:MGI Symbol;Acc:MGI:1935200]	chr18:37761801-37764299	ENSMUSG00000103081.3	chr18	37761801	37764299	+	2499	0.340996	0.878769
Mir124a-1hg	Mir124-1 host gene (non-protein coding) [Source:MGI Symbol;Acc:MGI:2442197]	chr14:64588777-64588967	ENSMUSG00000097545.7	chr14	64588777	64588967	+	191	0.340924	1.67443
Wac	WW domain containing adaptor with coiled-coil [Source:MGI Symbol;Acc:MGI:2387357]	chr18:7869197-7869615	ENSMUSG00000024283.15	chr18	7869197	7869615	+	419	0.340896	1.87925
Clvs2	clavesin 2 [Source:MGI Symbol;Acc:MGI:2443223]	chr10:33594311-33595918	ENSMUSG00000019785.14	chr10	33594311	33595918	-	1608	0.339817	2.09492
Armcx1	armadillo repeat containing, X-linked 1 [Source:MGI Symbol;Acc:MGI:1925498]	chrX:134718920-134719108	ENSMUSG00000033460.14	chrX	134718920	134719108	+	189	0.339377	3.12299
Eif4g1	eukaryotic translation initiation factor 4, gamma 1 [Source:MGI Symbol;Acc:MGI:2384784]	chr16:20684022-20684181	ENSMUSG00000045983.16	chr16	20684022	20684181	+	160	0.338923	1.71889
Smpd3	sphingomyelin phosphodiesterase 3, neutral [Source:MGI Symbol;Acc:MGI:1927578]	chr8:106255605-106255767	ENSMUSG00000031906.9	chr8	106255605	106255767	-	163	0.338649	2.21779
Ndc1	NDC1 transmembrane nucleoporin [Source:MGI Symbol;Acc:MGI:1920037]	chr4:107389451-107389606	ENSMUSG00000028614.14	chr4	107389451	107389606	+	156	0.338507	2.56651
Rpl13	ribosomal protein L13 [Source:MGI Symbol;Acc:MGI:105922]	chr8:123103898-123103954	ENSMUSG00000000740.12	chr8	123103898	123103954	+	57	0.337988	2.06916
Cebpzos	CCAAT/enhancer binding protein (C/EBP), zeta, opposite strand [Source:MGI Symbol;Acc:MGI:1915804]	chr17:78916517-78916693	ENSMUSG00000062691.10	chr17	78916517	78916693	+	177	0.337917	1.20967
Sucla2	succinate-Coenzyme A ligase, ADP-forming, beta subunit [Source:MGI Symbol;Acc:MGI:1306775]	chr14:73552632-73552897	ENSMUSG00000022110.13	chr14	73552632	73552897	+	266	0.337548	1.04522
Mir124a-1hg	Mir124-1 host gene (non-protein coding) [Source:MGI Symbol;Acc:MGI:2442197]	chr14:64588534-64588967	ENSMUSG00000097545.7	chr14	64588534	64588967	+	434	0.337256	2.42291
Ckmt1	creatine kinase, mitochondrial 1, ubiquitous [Source:MGI Symbol;Acc:MGI:99441]	chr2:121360556-121360627	ENSMUSG00000000308.14	chr2	121360556	121360627	+	72	0.337034	2.72208
Tspan3	tetraspanin 3 [Source:MGI Symbol;Acc:MGI:1928098]	chr9:56144087-56145572	ENSMUSG00000032324.11	chr9	56144087	56145572	-	1486	0.337033	2.21624
Gusb	glucuronidase, beta [Source:MGI Symbol;Acc:MGI:95872]	chr5:129990017-129990152	ENSMUSG00000025534.17	chr5	129990017	129990152	-	136	0.336687	2.4985
Rpl14	ribosomal protein L14 [Source:MGI Symbol;Acc:MGI:1914365]	chr9:120573576-120573675	ENSMUSG00000025794.9	chr9	120573576	120573675	+	100	0.336113	1.88457
Anp32b	acidic (leucine-rich) nuclear phosphoprotein 32 family, member B [Source:MGI Symbol;Acc:MGI:1914878]	chr4:46450902-46451349	ENSMUSG00000028333.10	chr4	46450902	46451349	+	448	0.335915	2.07069
Wac	WW domain containing adaptor with coiled-coil [Source:MGI Symbol;Acc:MGI:2387357]	chr18:7869241-7869615	ENSMUSG00000024283.15	chr18	7869241	7869615	+	375	0.335674	1.89357
Tub	tubby bipartite transcription factor [Source:MGI Symbol;Acc:MGI:2651573]	chr7:109027223-109027870	ENSMUSG00000031028.14	chr7	109027223	109027870	+	648	0.33566	1.76033
Nav2	neuron navigator 2 [Source:MGI Symbol;Acc:MGI:2183691]	chr7:49553892-49556730	ENSMUSG00000052512.17	chr7	49553892	49556730	+	2839	0.335158	1.76921
Atp6v1h	ATPase, H+ transporting, lysosomal V1 subunit H [Source:MGI Symbol;Acc:MGI:1914864]	chr1:5098029-5099777	ENSMUSG00000033793.12	chr1	5098029	5099777	+	1749	0.334225	2.91204
Mtg1	mitochondrial ribosome-associated GTPase 1 [Source:MGI Symbol;Acc:MGI:2685015]	chr7:140140196-140142138	ENSMUSG00000039018.15	chr7	140140196	140142138	+	1943	0.333695	1.40954
Fbxw2	F-box and WD-40 domain protein 2 [Source:MGI Symbol;Acc:MGI:1353435]	chr2:34806253-34807447	ENSMUSG00000035949.15	chr2	34806253	34807447	-	1195	0.332699	2.02748
Zfp131	zinc finger protein 131 [Source:MGI Symbol;Acc:MGI:1919715]	chr13:119790149-119790738	ENSMUSG00000094870.8	chr13	119790149	119790738	-	590	0.332655	3.0118
Rhoc	ras homolog family member C [Source:MGI Symbol;Acc:MGI:106028]	chr3:104791889-104792052	ENSMUSG00000002233.13	chr3	104791889	104792052	+	164	0.331959	1.5862
Fermt2	fermitin family member 2 [Source:MGI Symbol;Acc:MGI:2385001]	chr14:45529425-45529591	ENSMUSG00000037712.16	chr14	45529425	45529591	-	167	0.330672	2.05011
Vdac1	voltage-dependent anion channel 1 [Source:MGI Symbol;Acc:MGI:106919]	chr11:52388432-52388496	ENSMUSG00000020402.11	chr11	52388432	52388496	+	65	0.330193	2.39927
Ipo8	importin 8 [Source:MGI Symbol;Acc:MGI:2444611]	chr6:148798623-148798801	ENSMUSG00000040029.15	chr6	148798623	148798801	-	179	0.329973	2.6856
Ipo8	importin 8 [Source:MGI Symbol;Acc:MGI:2444611]	chr6:148798623-148798783	ENSMUSG00000040029.15	chr6	148798623	148798783	-	161	0.329973	2.6856
Zbed6	zinc finger, BED type containing 6 [Source:NCBI gene (formerly Entrezgene);Acc:667118]	chr1:133622117-133622184	ENSMUSG00000094410.8	chr1	133622117	133622184	-	68	0.329425	2.93667
Acadl	acyl-Coenzyme A dehydrogenase, long-chain [Source:MGI Symbol;Acc:MGI:87866]	chr1:66845168-66845332	ENSMUSG00000026003.5	chr1	66845168	66845332	-	165	0.328995	2.76414
Pdk1	pyruvate dehydrogenase kinase, isoenzyme 1 [Source:MGI Symbol;Acc:MGI:1926119]	chr2:71883843-71884184	ENSMUSG00000006494.11	chr2	71883843	71884184	+	342	0.327805	2.64204
Arhgap17	Rho GTPase activating protein 17 [Source:MGI Symbol;Acc:MGI:1917747]	chr7:123282937-123286241	ENSMUSG00000030766.15	chr7	123282937	123286241	-	3305	0.327385	2.97188
Nsmf	NMDA receptor synaptonuclear signaling and neuronal migration factor [Source:MGI Symbol;Acc:MGI:1861755]	chr2:25060139-25060263	ENSMUSG00000006476.19	chr2	25060139	25060263	+	125	0.327142	3.00043
Ccdc97	coiled-coil domain containing 97 [Source:MGI Symbol;Acc:MGI:1196455]	chr7:25718918-25719067	ENSMUSG00000002608.8	chr7	25718918	25719067	-	150	0.326512	1.76984
Hmg20a	high mobility group 20A [Source:MGI Symbol;Acc:MGI:1914117]	chr9:56474531-56476117	ENSMUSG00000032329.4	chr9	56474531	56476117	+	1587	0.325424	1.36065
Zfp932	zinc finger protein 932 [Source:MGI Symbol;Acc:MGI:1916754]	chr5:110006396-110007070	ENSMUSG00000066613.14	chr5	110006396	110007070	+	675	0.324515	1.96536
Adgra3	adhesion G protein-coupled receptor A3 [Source:MGI Symbol;Acc:MGI:1917943]	chr5:49978943-49979151	ENSMUSG00000029090.12	chr5	49978943	49979151	-	209	0.323915	3.40419
Arhgap23	Rho GTPase activating protein 23 [Source:MGI Symbol;Acc:MGI:3697726]	chr11:97454214-97454325	ENSMUSG00000049807.16	chr11	97454214	97454325	+	112	0.323476	2.30116
Cxxc1	CXXC finger 1 (PHD domain) [Source:MGI Symbol;Acc:MGI:1921572]	chr18:74218086-74218277	ENSMUSG00000024560.7	chr18	74218086	74218277	+	192	0.32251	2.75656
Cd81	CD81 antigen [Source:MGI Symbol;Acc:MGI:1096398]	chr7:143067147-143067233	ENSMUSG00000037706.17	chr7	143067147	143067233	+	87	0.322088	2.37233
Rtca	RNA 3-terminal phosphate cyclase [Source:MGI Symbol;Acc:MGI:1913618]	chr3:116495636-116495965	ENSMUSG00000000339.14	chr3	116495636	116495965	-	330	0.321227	1.47418
Prkcsh	protein kinase C substrate 80K-H [Source:MGI Symbol;Acc:MGI:107877]	chr9:22011167-22011253	ENSMUSG00000003402.14	chr9	22011167	22011253	+	87	0.32114	3.95553
Glul	glutamate-ammonia ligase (glutamine synthetase) [Source:MGI Symbol;Acc:MGI:95739]	chr1:153900585-153901145	ENSMUSG00000026473.16	chr1	153900585	153901145	+	561	0.320663	0.717445
Pxylp1	2-phosphoxylose phosphatase 1 [Source:MGI Symbol;Acc:MGI:2442444]	chr9:96828930-96829069	ENSMUSG00000043587.15	chr9	96828930	96829069	-	140	0.319637	2.80961
Pcbp3	poly(rC) binding protein 3 [Source:MGI Symbol;Acc:MGI:1890470]	chr10:76892557-76892656	ENSMUSG00000001120.15	chr10	76892557	76892656	-	100	0.319627	2.25887
Ccnh	cyclin H [Source:MGI Symbol;Acc:MGI:1913921]	chr13:85206128-85206198	ENSMUSG00000021548.10	chr13	85206128	85206198	+	71	0.319474	2.40293
Zfp335	zinc finger protein 335 [Source:MGI Symbol;Acc:MGI:2682313]	chr2:164911517-164911757	ENSMUSG00000039834.17	chr2	164911517	164911757	-	241	0.319305	1.05003
Psenen	presenilin enhancer gamma secretase subunit [Source:MGI Symbol;Acc:MGI:1913590]	chr7:30562796-30562931	ENSMUSG00000036835.7	chr7	30562796	30562931	-	136	0.319185	2.45184
Psenen	presenilin enhancer gamma secretase subunit [Source:MGI Symbol;Acc:MGI:1913590]	chr7:30562796-30562938	ENSMUSG00000036835.7	chr7	30562796	30562938	-	143	0.319185	2.45184
Lipa	lysosomal acid lipase A [Source:MGI Symbol;Acc:MGI:96789]	chr19:34495060-34495131	ENSMUSG00000024781.16	chr19	34495060	34495131	-	72	0.318892	3.07346
Slc16a11	solute carrier family 16 (monocarboxylic acid transporters), member 11 [Source:MGI Symbol;Acc:MGI:2663709]	chr11:70215284-70215480	ENSMUSG00000040938.16	chr11	70215284	70215480	+	197	0.31801	2.34176
Mapk1	mitogen-activated protein kinase 1 [Source:MGI Symbol;Acc:MGI:1346858]	chr16:17038314-17039040	ENSMUSG00000063358.17	chr16	17038314	17039040	+	727	0.317968	2.75784
Hspa8	heat shock protein 8 [Source:MGI Symbol;Acc:MGI:105384]	chr9:40801289-40802127	ENSMUSG00000015656.17	chr9	40801289	40802127	+	839	0.317705	0.5374
Hsd17b4	hydroxysteroid (17-beta) dehydrogenase 4 [Source:MGI Symbol;Acc:MGI:105089]	chr18:50128201-50128409	ENSMUSG00000024507.6	chr18	50128201	50128409	+	209	0.317321	2.20408
Als2	alsin Rho guanine nucleotide exchange factor [Source:MGI Symbol;Acc:MGI:1921268]	chr1:59216344-59219126	ENSMUSG00000026024.14	chr1	59216344	59219126	-	2783	0.317039	0.839031
Psenen	presenilin enhancer gamma secretase subunit [Source:MGI Symbol;Acc:MGI:1913590]	chr7:30562796-30562887	ENSMUSG00000036835.7	chr7	30562796	30562887	-	92	0.315912	2.46198
Gstp1	glutathione S-transferase, pi 1 [Source:MGI Symbol;Acc:MGI:95865]	chr19:4036688-4036791	ENSMUSG00000060803.6	chr19	4036688	4036791	-	104	0.315847	3.04491
Rtca	RNA 3-terminal phosphate cyclase [Source:MGI Symbol;Acc:MGI:1913618]	chr3:116495636-116495694	ENSMUSG00000000339.14	chr3	116495636	116495694	-	59	0.314719	2.07052
Uba1	ubiquitin-like modifier activating enzyme 1 [Source:MGI Symbol;Acc:MGI:98890]	chrX:20679593-20679782	ENSMUSG00000001924.15	chrX	20679593	20679782	+	190	0.314013	2.46084
Adrm1	adhesion regulating molecule 1 [Source:MGI Symbol;Acc:MGI:1929289]	chr2:180172856-180172972	ENSMUSG00000039041.15	chr2	180172856	180172972	+	117	0.31344	1.92642
Mindy3	MINDY lysine 48 deubiquitinase 3 [Source:MGI Symbol;Acc:MGI:1914210]	chr2:12386609-12386679	ENSMUSG00000026767.12	chr2	12386609	12386679	-	71	0.313406	2.26393
Mfsd14b	major facilitator superfamily domain containing 14B [Source:MGI Symbol;Acc:MGI:1913881]	chr13:65069644-65069741	ENSMUSG00000038212.16	chr13	65069644	65069741	-	98	0.312946	2.57463
Serpinh1	serine (or cysteine) peptidase inhibitor, clade H, member 1 [Source:MGI Symbol;Acc:MGI:88283]	chr7:99346925-99347157	ENSMUSG00000070436.12	chr7	99346925	99347157	-	233	0.311526	1.81863
Ppia	peptidylprolyl isomerase A [Source:MGI Symbol;Acc:MGI:97749]	chr11:6419478-6419812	ENSMUSG00000071866.12	chr11	6419478	6419812	+	335	0.310693	2.49028
Ppia	peptidylprolyl isomerase A [Source:MGI Symbol;Acc:MGI:97749]	chr11:6419478-6419815	ENSMUSG00000071866.12	chr11	6419478	6419815	+	338	0.310693	2.49028
Ppia	peptidylprolyl isomerase A [Source:MGI Symbol;Acc:MGI:97749]	chr11:6419478-6419804	ENSMUSG00000071866.12	chr11	6419478	6419804	+	327	0.310693	2.49028
Ppia	peptidylprolyl isomerase A [Source:MGI Symbol;Acc:MGI:97749]	chr11:6419478-6419817	ENSMUSG00000071866.12	chr11	6419478	6419817	+	340	0.310693	2.49028
Septin8	septin 8 [Source:MGI Symbol;Acc:MGI:894310]	chr11:53519927-53520039	ENSMUSG00000018398.18	chr11	53519927	53520039	+	113	0.310654	1.88022
Npas2	neuronal PAS domain protein 2 [Source:MGI Symbol;Acc:MGI:109232]	chr1:39193731-39194009	ENSMUSG00000026077.15	chr1	39193731	39194009	+	279	0.310291	1.52778
Dock1	dedicator of cytokinesis 1 [Source:MGI Symbol;Acc:MGI:2429765]	chr7:135168363-135168514	ENSMUSG00000058325.6	chr7	135168363	135168514	+	152	0.310127	2.97524
Naa40	N(alpha)-acetyltransferase 40, NatD catalytic subunit [Source:MGI Symbol;Acc:MGI:1918249]	chr19:7236535-7241054	ENSMUSG00000024764.10	chr19	7236535	7241054	-	4520	0.30996	1.64743
Ttll1	tubulin tyrosine ligase-like 1 [Source:MGI Symbol;Acc:MGI:2443047]	chr15:83491874-83492625	ENSMUSG00000022442.16	chr15	83491874	83492625	-	752	0.309639	1.92581
Gpcpd1	glycerophosphocholine phosphodiesterase 1 [Source:MGI Symbol;Acc:MGI:104898]	chr2:132539899-132539938	ENSMUSG00000027346.15	chr2	132539899	132539938	-	40	0.308753	3.45655
Sh3d19	SH3 domain protein D19 [Source:MGI Symbol;Acc:MGI:1350923]	chr3:86098147-86098259	ENSMUSG00000028082.14	chr3	86098147	86098259	+	113	0.308572	2.1067
Adar	adenosine deaminase, RNA-specific [Source:MGI Symbol;Acc:MGI:1889575]	chr3:89715022-89716689	ENSMUSG00000027951.16	chr3	89715022	89716689	+	1668	0.308514	0.699097
Drg2	developmentally regulated GTP binding protein 2 [Source:MGI Symbol;Acc:MGI:1342307]	chr11:60464833-60464891	ENSMUSG00000020537.9	chr11	60464833	60464891	+	59	0.307986	2.2136
Mlf2	myeloid leukemia factor 2 [Source:MGI Symbol;Acc:MGI:1353554]	chr6:124931405-124931586	ENSMUSG00000030120.14	chr6	124931405	124931586	+	182	0.307433	1.95943
Mlf2	myeloid leukemia factor 2 [Source:MGI Symbol;Acc:MGI:1353554]	chr6:124931425-124931586	ENSMUSG00000030120.14	chr6	124931425	124931586	+	162	0.307433	1.95943
Mlf2	myeloid leukemia factor 2 [Source:MGI Symbol;Acc:MGI:1353554]	chr6:124931432-124931586	ENSMUSG00000030120.14	chr6	124931432	124931586	+	155	0.307433	1.95943
Mlf2	myeloid leukemia factor 2 [Source:MGI Symbol;Acc:MGI:1353554]	chr6:124931386-124931586	ENSMUSG00000030120.14	chr6	124931386	124931586	+	201	0.306951	1.9706
Atg2a	autophagy related 2A [Source:MGI Symbol;Acc:MGI:1916291]	chr19:6255619-6255827	ENSMUSG00000024773.15	chr19	6255619	6255827	+	209	0.305913	2.39556
Anxa6	annexin A6 [Source:MGI Symbol;Acc:MGI:88255]	chr11:54990950-54991444	ENSMUSG00000018340.13	chr11	54990950	54991444	-	495	0.305574	1.4653
Ttc1	tetratricopeptide repeat domain 1 [Source:MGI Symbol;Acc:MGI:1914077]	chr11:43736419-43736473	ENSMUSG00000041278.10	chr11	43736419	43736473	-	55	0.305363	2.68428
Nipsnap2	nipsnap homolog 2 [Source:MGI Symbol;Acc:MGI:1278343]	chr5:129754772-129754863	ENSMUSG00000029432.12	chr5	129754772	129754863	+	92	0.304933	2.15263
D6Wsu163e	DNA segment, Chr 6, Wayne State University 163, expressed [Source:MGI Symbol;Acc:MGI:107893]	chr6:126955849-126955977	ENSMUSG00000030347.6	chr6	126955849	126955977	+	129	0.304795	3.10135
Ufsp2	UFM1-specific peptidase 2 [Source:MGI Symbol;Acc:MGI:1913679]	chr8:45980573-45980865	ENSMUSG00000031634.13	chr8	45980573	45980865	+	293	0.304402	2.79593
Ppp1cb	protein phosphatase 1 catalytic subunit beta [Source:MGI Symbol;Acc:MGI:104871]	chr5:32459186-32461486	ENSMUSG00000014956.15	chr5	32459186	32461486	+	2301	0.303611	1.37729
Prdx2	peroxiredoxin 2 [Source:MGI Symbol;Acc:MGI:109486]	chr8:84969587-84969762	ENSMUSG00000005161.15	chr8	84969587	84969762	+	176	0.303602	1.91225
Pick1	protein interacting with C kinase 1 [Source:MGI Symbol;Acc:MGI:894645]	chr15:79245978-79246111	ENSMUSG00000068206.13	chr15	79245978	79246111	+	134	0.303148	2.77257
Nudcd2	NudC domain containing 2 [Source:MGI Symbol;Acc:MGI:1277103]	chr11:40733946-40734154	ENSMUSG00000020328.10	chr11	40733946	40734154	+	209	0.302822	2.72968
Tmem131	transmembrane protein 131 [Source:MGI Symbol;Acc:MGI:1927110]	chr1:36800953-36801952	ENSMUSG00000026116.11	chr1	36800953	36801952	-	1000	0.302735	1.72363
Ppp1cb	protein phosphatase 1 catalytic subunit beta [Source:MGI Symbol;Acc:MGI:104871]	chr5:32459222-32459407	ENSMUSG00000014956.15	chr5	32459222	32459407	+	186	0.301062	2.03192
Ppp1cb	protein phosphatase 1 catalytic subunit beta [Source:MGI Symbol;Acc:MGI:104871]	chr5:32458843-32459407	ENSMUSG00000014956.15	chr5	32458843	32459407	+	565	0.300883	1.60838
Gabarap	gamma-aminobutyric acid receptor associated protein [Source:MGI Symbol;Acc:MGI:1861742]	chr11:69992365-69992443	ENSMUSG00000018567.14	chr11	69992365	69992443	+	79	0.300868	2.14772
Klc1	kinesin light chain 1 [Source:MGI Symbol;Acc:MGI:107978]	chr12:111795180-111795678	ENSMUSG00000021288.19	chr12	111795180	111795678	+	499	0.300421	1.03305
Gmds	GDP-mannose 4, 6-dehydratase [Source:MGI Symbol;Acc:MGI:1891112]	chr13:32225135-32225244	ENSMUSG00000038372.14	chr13	32225135	32225244	-	110	0.30011	2.98183
Dhrs11	dehydrogenase/reductase (SDR family) member 11 [Source:MGI Symbol;Acc:MGI:2652816]	chr11:84825368-84825577	ENSMUSG00000034449.7	chr11	84825368	84825577	-	210	0.300055	1.99614
Abcb10	ATP-binding cassette, sub-family B (MDR/TAP), member 10 [Source:MGI Symbol;Acc:MGI:1860508]	chr8:123982402-123983122	ENSMUSG00000031974.8	chr8	123982402	123983122	-	721	0.299655	2.17935
Ovca2	candidate tumor suppressor in ovarian cancer 2 [Source:MGI Symbol;Acc:MGI:2179725]	chr11:75178612-75178835	ENSMUSG00000038268.4	chr11	75178612	75178835	-	224	0.299546	1.4079
Cabin1	calcineurin binding protein 1 [Source:MGI Symbol;Acc:MGI:1298375]	chr10:75734966-75735208	ENSMUSG00000020196.10	chr10	75734966	75735208	-	243	0.297801	2.24691
Psenen	presenilin enhancer gamma secretase subunit [Source:MGI Symbol;Acc:MGI:1913590]	chr7:30562796-30563087	ENSMUSG00000036835.7	chr7	30562796	30563087	-	292	0.297268	1.78017
Atp11a	ATPase, class VI, type 11A [Source:MGI Symbol;Acc:MGI:1354735]	chr8:12832509-12832678	ENSMUSG00000031441.15	chr8	12832509	12832678	+	170	0.296973	2.13843
Eml5	echinoderm microtubule associated protein like 5 [Source:MGI Symbol;Acc:MGI:2442513]	chr12:98800903-98801111	ENSMUSG00000051166.10	chr12	98800903	98801111	-	209	0.296909	2.60989
Ube2l3	ubiquitin-conjugating enzyme E2L 3 [Source:MGI Symbol;Acc:MGI:109240]	chr16:17157297-17160176	ENSMUSG00000038965.17	chr16	17157297	17160176	-	2880	0.296627	1.42137
Psmd3	proteasome (prosome, macropain) 26S subunit, non-ATPase, 3 [Source:MGI Symbol;Acc:MGI:98858]	chr11:98690916-98691469	ENSMUSG00000017221.14	chr11	98690916	98691469	+	554	0.295878	1.77047
Frmd6	FERM domain containing 6 [Source:MGI Symbol;Acc:MGI:2442579]	chr12:70894823-70895008	ENSMUSG00000048285.9	chr12	70894823	70895008	+	186	0.295738	2.20796
Epg5	ectopic P-granules autophagy protein 5 homolog (C. elegans) [Source:MGI Symbol;Acc:MGI:1918673]	chr18:78023926-78024070	ENSMUSG00000039840.8	chr18	78023926	78024070	+	145	0.295313	3.26674
Wdr3	WD repeat domain 3 [Source:MGI Symbol;Acc:MGI:2443143]	chr3:100148105-100148206	ENSMUSG00000033285.15	chr3	100148105	100148206	-	102	0.294229	2.26659
Galns	galactosamine (N-acetyl)-6-sulfate sulfatase [Source:MGI Symbol;Acc:MGI:1355303]	chr8:122600475-122600618	ENSMUSG00000015027.11	chr8	122600475	122600618	-	144	0.293652	2.80133
Syde1	synapse defective 1, Rho GTPase, homolog 1 (C. elegans) [Source:MGI Symbol;Acc:MGI:1918959]	chr10:78586959-78587119	ENSMUSG00000032714.6	chr10	78586959	78587119	-	161	0.293276	2.24778
Vash2	vasohibin 2 [Source:MGI Symbol;Acc:MGI:2444826]	chr1:190978181-190978587	ENSMUSG00000037568.12	chr1	190978181	190978587	-	407	0.293214	2.24463
Maged1	MAGE family member D1 [Source:MGI Symbol;Acc:MGI:1930187]	chrX:94536874-94536988	ENSMUSG00000025151.16	chrX	94536874	94536988	-	115	0.293199	2.15605
Prodh	proline dehydrogenase [Source:MGI Symbol;Acc:MGI:97770]	chr16:18084201-18089143	ENSMUSG00000003526.12	chr16	18084201	18089143	-	4943	0.293024	1.38449
Pdcd6	programmed cell death 6 [Source:MGI Symbol;Acc:MGI:109283]	chr13:74317107-74317580	ENSMUSG00000021576.6	chr13	74317107	74317580	-	474	0.292964	1.76996
Ankrd13a	ankyrin repeat domain 13a [Source:MGI Symbol;Acc:MGI:1915670]	chr5:114799571-114801563	ENSMUSG00000041870.16	chr5	114799571	114801563	+	1993	0.292601	1.13492
Spats2	spermatogenesis associated, serine-rich 2 [Source:MGI Symbol;Acc:MGI:1919822]	chr15:99126556-99126887	ENSMUSG00000051934.5	chr15	99126556	99126887	+	332	0.292594	3.30246
Nt5c	5,3-nucleotidase, cytosolic [Source:MGI Symbol;Acc:MGI:1354954]	chr11:115490853-115491202	ENSMUSG00000020736.12	chr11	115490853	115491202	-	350	0.292112	2.3199
Terf1	telomeric repeat binding factor 1 [Source:MGI Symbol;Acc:MGI:109634]	chr1:15819651-15822103	ENSMUSG00000025925.14	chr1	15819651	15822103	+	2453	0.29162	1.44218
Mtch1	mitochondrial carrier 1 [Source:MGI Symbol;Acc:MGI:1929261]	chr17:29333581-29333589	ENSMUSG00000024012.18	chr17	29333581	29333589	-	9	0.291505	3.36834
Dync1i1	dynein cytoplasmic 1 intermediate chain 1 [Source:MGI Symbol;Acc:MGI:107743]	chr6:5784439-5784898	ENSMUSG00000029757.16	chr6	5784439	5784898	+	460	0.290689	1.06941
Pex12	peroxisomal biogenesis factor 12 [Source:MGI Symbol;Acc:MGI:2144177]	chr11:83298717-83298895	ENSMUSG00000018733.10	chr11	83298717	83298895	-	179	0.290566	1.71673
Bicd2	BICD cargo adaptor 2 [Source:MGI Symbol;Acc:MGI:1924145]	chr13:49380571-49380722	ENSMUSG00000037933.16	chr13	49380571	49380722	+	152	0.290484	2.08936
Ttc1	tetratricopeptide repeat domain 1 [Source:MGI Symbol;Acc:MGI:1914077]	chr11:43736415-43736473	ENSMUSG00000041278.10	chr11	43736415	43736473	-	59	0.290333	2.89199
Tprgl	transformation related protein 63 regulated like [Source:MGI Symbol;Acc:MGI:1915058]	chr4:154159567-154160261	ENSMUSG00000029030.14	chr4	154159567	154160261	-	695	0.288987	1.57584
Ube3b	ubiquitin protein ligase E3B [Source:MGI Symbol;Acc:MGI:1891295]	chr5:114384315-114384402	ENSMUSG00000029577.13	chr5	114384315	114384402	+	88	0.288173	1.90491
Bms1	BMS1, ribosome biogenesis factor [Source:MGI Symbol;Acc:MGI:2446132]	chr6:118392803-118392991	ENSMUSG00000030138.8	chr6	118392803	118392991	-	189	0.287819	2.32823
Rpl41	ribosomal protein L41 [Source:MGI Symbol;Acc:MGI:1915195]	chr10:128549088-128549162	ENSMUSG00000093674.7	chr10	128549088	128549162	-	75	0.287724	0.455236
Rpl41	ribosomal protein L41 [Source:MGI Symbol;Acc:MGI:1915195]	chr10:128549088-128549159	ENSMUSG00000093674.7	chr10	128549088	128549159	-	72	0.287724	0.455236
Arhgap1	Rho GTPase activating protein 1 [Source:MGI Symbol;Acc:MGI:2445003]	chr2:91649860-91650252	ENSMUSG00000027247.16	chr2	91649860	91650252	+	393	0.287566	0.335591
Actr3b	ARP3 actin-related protein 3B [Source:MGI Symbol;Acc:MGI:2661120]	chr5:25809785-25809909	ENSMUSG00000056367.14	chr5	25809785	25809909	+	125	0.287321	1.95881
Rpl13a	ribosomal protein L13A [Source:MGI Symbol;Acc:MGI:1351455]	chr7:45126478-45126537	ENSMUSG00000074129.14	chr7	45126478	45126537	-	60	0.287295	2.5792
Fermt2	fermitin family member 2 [Source:MGI Symbol;Acc:MGI:2385001]	chr14:45482517-45483969	ENSMUSG00000037712.16	chr14	45482517	45483969	-	1453	0.286938	1.58112
Dusp4	dual specificity phosphatase 4 [Source:MGI Symbol;Acc:MGI:2442191]	chr8:34807297-34808173	ENSMUSG00000031530.6	chr8	34807297	34808173	+	877	0.286709	2.22121
Ube2q2	ubiquitin-conjugating enzyme E2Q family member 2 [Source:MGI Symbol;Acc:MGI:2388672]	chr9:55162968-55163069	ENSMUSG00000032307.16	chr9	55162968	55163069	+	102	0.286402	4.84886
Pdcd5	programmed cell death 5 [Source:MGI Symbol;Acc:MGI:1913538]	chr7:35642615-35643044	ENSMUSG00000030417.15	chr7	35642615	35643044	-	430	0.285729	2.9239
Taf1b	TATA-box binding protein associated factor, RNA polymerase I, B [Source:MGI Symbol;Acc:MGI:109577]	chr12:24547013-24547190	ENSMUSG00000059669.8	chr12	24547013	24547190	+	178	0.285465	2.25877
Lpin2	lipin 2 [Source:MGI Symbol;Acc:MGI:1891341]	chr17:71237386-71238085	ENSMUSG00000024052.17	chr17	71237386	71238085	+	700	0.285413	2.10622
Ddx39a	DEAD box helicase 39a [Source:MGI Symbol;Acc:MGI:1915528]	chr8:83722649-83722793	ENSMUSG00000005481.18	chr8	83722649	83722793	+	145	0.285374	3.07898
Tmem161b	transmembrane protein 161B [Source:MGI Symbol;Acc:MGI:1919995]	chr13:84272171-84274489	ENSMUSG00000035762.11	chr13	84272171	84274489	+	2319	0.285325	1.96692
Gpr107	G protein-coupled receptor 107 [Source:MGI Symbol;Acc:MGI:2139054]	chr2:31191847-31192113	ENSMUSG00000000194.13	chr2	31191847	31192113	+	267	0.28484	2.32961
Pank4	pantothenate kinase 4 [Source:MGI Symbol;Acc:MGI:2387466]	chr4:154971373-154971554	ENSMUSG00000029056.13	chr4	154971373	154971554	+	182	0.284555	2.34526
Mindy3	MINDY lysine 48 deubiquitinase 3 [Source:MGI Symbol;Acc:MGI:1914210]	chr2:12385946-12386781	ENSMUSG00000026767.12	chr2	12385946	12386781	-	836	0.284219	1.56943
Calu	calumenin [Source:MGI Symbol;Acc:MGI:1097158]	chr6:29374399-29374503	ENSMUSG00000029767.16	chr6	29374399	29374503	+	105	0.284133	2.47403
Metrnl	meteorin, glial cell differentiation regulator-like [Source:MGI Symbol;Acc:MGI:2384806]	chr11:121702411-121702795	ENSMUSG00000039208.15	chr11	121702411	121702795	+	385	0.284049	2.13086
Srrm2	serine/arginine repetitive matrix 2 [Source:MGI Symbol;Acc:MGI:1923206]	chr17:23790532-23790945	ENSMUSG00000039218.17	chr17	23790532	23790945	+	414	0.283538	1.46635
Hddc3	HD domain containing 3 [Source:MGI Symbol;Acc:MGI:1915945]	chr7:80343144-80343455	ENSMUSG00000030532.6	chr7	80343144	80343455	+	312	0.283501	1.70553
Strap	serine/threonine kinase receptor associated protein [Source:MGI Symbol;Acc:MGI:1329037]	chr6:137735078-137735466	ENSMUSG00000030224.10	chr6	137735078	137735466	+	389	0.283104	2.67386
Snap91	synaptosomal-associated protein 91 [Source:MGI Symbol;Acc:MGI:109132]	chr9:86815430-86815500	ENSMUSG00000033419.16	chr9	86815430	86815500	-	71	0.282829	2.98605
Mcu	mitochondrial calcium uniporter [Source:MGI Symbol;Acc:MGI:3026965]	chr10:59466454-59466558	ENSMUSG00000009647.13	chr10	59466454	59466558	-	105	0.282808	2.73367
Srxn1	sulfiredoxin 1 homolog (S. cerevisiae) [Source:MGI Symbol;Acc:MGI:104971]	chr2:152105516-152105738	ENSMUSG00000032802.8	chr2	152105516	152105738	+	223	0.282577	0.551996
Sdcbp	syndecan binding protein [Source:MGI Symbol;Acc:MGI:1337026]	chr4:6392946-6393117	ENSMUSG00000028249.15	chr4	6392946	6393117	+	172	0.282305	2.89019
Rps18	ribosomal protein S18 [Source:MGI Symbol;Acc:MGI:98146]	chr17:33952403-33952591	ENSMUSG00000008668.15	chr17	33952403	33952591	-	189	0.282195	3.88701
Klhdc9	kelch domain containing 9 [Source:MGI Symbol;Acc:MGI:1916124]	chr1:171360135-171360798	ENSMUSG00000045259.4	chr1	171360135	171360798	-	664	0.282128	1.62285
Arsa	arylsulfatase A [Source:MGI Symbol;Acc:MGI:88077]	chr15:89475122-89475362	ENSMUSG00000022620.14	chr15	89475122	89475362	-	241	0.281761	2.32806
Sdcbp	syndecan binding protein [Source:MGI Symbol;Acc:MGI:1337026]	chr4:6392946-6393111	ENSMUSG00000028249.15	chr4	6392946	6393111	+	166	0.281678	2.88826
Chst10	carbohydrate sulfotransferase 10 [Source:MGI Symbol;Acc:MGI:2138283]	chr1:38890632-38896056	ENSMUSG00000026080.13	chr1	38890632	38896056	-	5425	0.281677	1.29073
Rps18	ribosomal protein S18 [Source:MGI Symbol;Acc:MGI:98146]	chr17:33952221-33952591	ENSMUSG00000008668.15	chr17	33952221	33952591	-	371	0.281584	2.76503
Pfas	phosphoribosylformylglycinamidine synthase (FGAR amidotransferase) [Source:MGI Symbol;Acc:MGI:2684864]	chr11:68993808-68993964	ENSMUSG00000020899.16	chr11	68993808	68993964	-	157	0.281073	2.39236
Armcx1	armadillo repeat containing, X-linked 1 [Source:MGI Symbol;Acc:MGI:1925498]	chrX:134718920-134719313	ENSMUSG00000033460.14	chrX	134718920	134719313	+	394	0.280972	2.30373
Itpr1	inositol 1,4,5-trisphosphate receptor 1 [Source:MGI Symbol;Acc:MGI:96623]	chr6:108508313-108512930	ENSMUSG00000030102.11	chr6	108508313	108512930	+	4618	0.280477	1.15539
Dalrd3	DALR anticodon binding domain containing 3 [Source:MGI Symbol;Acc:MGI:1915039]	chr9:108571613-108571674	ENSMUSG00000019039.14	chr9	108571613	108571674	+	62	0.280122	2.26838
Txnrd1	thioredoxin reductase 1 [Source:MGI Symbol;Acc:MGI:1354175]	chr10:82875624-82875696	ENSMUSG00000020250.10	chr10	82875624	82875696	+	73	0.279623	2.50048
Supv3l1	suppressor of var1, 3-like 1 (S. cerevisiae) [Source:MGI Symbol;Acc:MGI:2441711]	chr10:62432289-62432465	ENSMUSG00000020079.15	chr10	62432289	62432465	-	177	0.278982	2.53756
Nr4a1	nuclear receptor subfamily 4, group A, member 1 [Source:MGI Symbol;Acc:MGI:1352454]	chr15:101268928-101269103	ENSMUSG00000023034.7	chr15	101268928	101269103	+	176	0.278708	1.20869
Anapc1	anaphase promoting complex subunit 1 [Source:MGI Symbol;Acc:MGI:103097]	chr2:128628497-128628639	ENSMUSG00000014355.10	chr2	128628497	128628639	-	143	0.278511	3.1903
Rps8	ribosomal protein S8 [Source:MGI Symbol;Acc:MGI:98166]	chr4:117154391-117154813	ENSMUSG00000047675.15	chr4	117154391	117154813	-	423	0.277853	2.95223
Gabarapl1	gamma-aminobutyric acid (GABA) A receptor-associated protein-like 1 [Source:MGI Symbol;Acc:MGI:1914980]	chr6:129533551-129533743	ENSMUSG00000030161.8	chr6	129533551	129533743	+	193	0.27774	0.307135
Trpc4ap	transient receptor potential cation channel, subfamily C, member 4 associated protein [Source:MGI Symbol;Acc:MGI:1930751]	chr2:155637658-155637782	ENSMUSG00000038324.13	chr2	155637658	155637782	-	125	0.277234	2.66203
Trpc4ap	transient receptor potential cation channel, subfamily C, member 4 associated protein [Source:MGI Symbol;Acc:MGI:1930751]	chr2:155637658-155637766	ENSMUSG00000038324.13	chr2	155637658	155637766	-	109	0.277234	2.66203
Helq	helicase, POLQ-like [Source:MGI Symbol;Acc:MGI:2176740]	chr5:100764941-100765075	ENSMUSG00000035266.16	chr5	100764941	100765075	-	135	0.277037	2.43516
Mast3	microtubule associated serine/threonine kinase 3 [Source:MGI Symbol;Acc:MGI:2683541]	chr8:70783465-70783598	ENSMUSG00000031833.10	chr8	70783465	70783598	-	134	0.277007	2.18238
Rpl41	ribosomal protein L41 [Source:MGI Symbol;Acc:MGI:1915195]	chr10:128549088-128549305	ENSMUSG00000093674.7	chr10	128549088	128549305	-	218	0.276813	0.37723
Crhr1	corticotropin releasing hormone receptor 1 [Source:MGI Symbol;Acc:MGI:88498]	chr11:104169056-104169162	ENSMUSG00000018634.10	chr11	104169056	104169162	+	107	0.276221	3.08773
Celsr2	cadherin, EGF LAG seven-pass G-type receptor 2 [Source:MGI Symbol;Acc:MGI:1858235]	chr3:108396947-108397114	ENSMUSG00000068740.13	chr3	108396947	108397114	-	168	0.274873	3.11516
Prkacb	protein kinase, cAMP dependent, catalytic, beta [Source:MGI Symbol;Acc:MGI:97594]	chr3:146809518-146812990	ENSMUSG00000005034.15	chr3	146809518	146812990	-	3473	0.274074	0.782667
Actn4	actinin alpha 4 [Source:MGI Symbol;Acc:MGI:1890773]	chr7:28895432-28895512	ENSMUSG00000054808.15	chr7	28895432	28895512	-	81	0.273114	1.8756
Smn1	survival motor neuron 1 [Source:MGI Symbol;Acc:MGI:109257]	chr13:100128215-100128630	ENSMUSG00000021645.16	chr13	100128215	100128630	+	416	0.273011	2.5385
Ppif	peptidylprolyl isomerase F (cyclophilin F) [Source:MGI Symbol;Acc:MGI:2145814]	chr14:25696004-25696092	ENSMUSG00000021868.7	chr14	25696004	25696092	+	89	0.272804	2.27476
Loxl3	lysyl oxidase-like 3 [Source:MGI Symbol;Acc:MGI:1337004]	chr6:83050308-83050444	ENSMUSG00000000693.10	chr6	83050308	83050444	+	137	0.272752	2.16652
Gart	phosphoribosylglycinamide formyltransferase [Source:MGI Symbol;Acc:MGI:95654]	chr16:91621673-91621748	ENSMUSG00000022962.15	chr16	91621673	91621748	-	76	0.272719	2.48713
Mrpl13	mitochondrial ribosomal protein L13 [Source:MGI Symbol;Acc:MGI:2137218]	chr15:55549454-55555443	ENSMUSG00000022370.13	chr15	55549454	55555443	-	5990	0.272508	1.55429
P4ha1	procollagen-proline, 2-oxoglutarate 4-dioxygenase (proline 4-hydroxylase), alpha 1 polypeptide [Source:MGI Symbol;Acc:MGI:97463]	chr10:59361861-59361960	ENSMUSG00000019916.14	chr10	59361861	59361960	+	100	0.272472	2.80881
Faxc	failed axon connections homolog [Source:MGI Symbol;Acc:MGI:1923382]	chr4:21931331-21931829	ENSMUSG00000028246.13	chr4	21931331	21931829	+	499	0.272387	2.23748
Faxc	failed axon connections homolog [Source:MGI Symbol;Acc:MGI:1923382]	chr4:21931333-21931829	ENSMUSG00000028246.13	chr4	21931333	21931829	+	497	0.272387	2.23748
Faxc	failed axon connections homolog [Source:MGI Symbol;Acc:MGI:1923382]	chr4:21931329-21931829	ENSMUSG00000028246.13	chr4	21931329	21931829	+	501	0.272387	2.23748
Tspyl4	TSPY-like 4 [Source:MGI Symbol;Acc:MGI:106393]	chr10:34299256-34299408	ENSMUSG00000039485.8	chr10	34299256	34299408	+	153	0.272237	1.87203
Kctd9	potassium channel tetramerisation domain containing 9 [Source:MGI Symbol;Acc:MGI:2145579]	chr14:67738377-67739661	ENSMUSG00000034327.17	chr14	67738377	67739661	+	1285	0.27198	1.49401
Septin8	septin 8 [Source:MGI Symbol;Acc:MGI:894310]	chr11:53519908-53520039	ENSMUSG00000018398.18	chr11	53519908	53520039	+	132	0.27193	1.96201
Vwa8	von Willebrand factor A domain containing 8 [Source:MGI Symbol;Acc:MGI:1919008]	chr14:79018607-79018713	ENSMUSG00000058997.8	chr14	79018607	79018713	+	107	0.271839	2.08332
Ccdc97	coiled-coil domain containing 97 [Source:MGI Symbol;Acc:MGI:1196455]	chr7:25718918-25719055	ENSMUSG00000002608.8	chr7	25718918	25719055	-	138	0.27182	1.21042
Gcat	glycine C-acetyltransferase (2-amino-3-ketobutyrate-coenzyme A ligase) [Source:MGI Symbol;Acc:MGI:1349389]	chr15:79036267-79036438	ENSMUSG00000006378.15	chr15	79036267	79036438	+	172	0.271352	2.51215
Gipr	gastric inhibitory polypeptide receptor [Source:MGI Symbol;Acc:MGI:1352753]	chr7:19159746-19160030	ENSMUSG00000030406.7	chr7	19159746	19160030	-	285	0.271128	2.58494
Mfsd14b	major facilitator superfamily domain containing 14B [Source:MGI Symbol;Acc:MGI:1913881]	chr13:65069644-65069827	ENSMUSG00000038212.16	chr13	65069644	65069827	-	184	0.270939	2.11543
Srrm3	serine/arginine repetitive matrix 3 [Source:MGI Symbol;Acc:MGI:1920309]	chr5:135840353-135841953	ENSMUSG00000039860.19	chr5	135840353	135841953	+	1601	0.2708	1.14179
Ssna1	SS nuclear autoantigen 1 [Source:MGI Symbol;Acc:MGI:1915725]	chr2:25272298-25272416	ENSMUSG00000026966.6	chr2	25272298	25272416	-	119	0.270196	2.33649
Ssna1	SS nuclear autoantigen 1 [Source:MGI Symbol;Acc:MGI:1915725]	chr2:25272298-25272404	ENSMUSG00000026966.6	chr2	25272298	25272404	-	107	0.270196	2.33649
Pdha1	pyruvate dehydrogenase E1 alpha 1 [Source:MGI Symbol;Acc:MGI:97532]	chrX:160129288-160129501	ENSMUSG00000031299.10	chrX	160129288	160129501	-	214	0.270118	2.64909
Poldip3	polymerase (DNA-directed), delta interacting protein 3 [Source:MGI Symbol;Acc:MGI:1921076]	chr15:83135294-83135389	ENSMUSG00000041815.14	chr15	83135294	83135389	-	96	0.269543	2.58855
Tceanc2	transcription elongation factor A (SII) N-terminal and central domain containing 2 [Source:MGI Symbol;Acc:MGI:1913776]	chr4:107134155-107139799	ENSMUSG00000028619.15	chr4	107134155	107139799	-	5645	0.268603	2.60893
Ap2a1	adaptor-related protein complex 2, alpha 1 subunit [Source:MGI Symbol;Acc:MGI:101921]	chr7:44904653-44904750	ENSMUSG00000060279.14	chr7	44904653	44904750	-	98	0.268251	2.38637
Arf3	ADP-ribosylation factor 3 [Source:MGI Symbol;Acc:MGI:99432]	chr15:98762980-98763214	ENSMUSG00000051853.10	chr15	98762980	98763214	-	235	0.267774	1.48398
Ociad1	OCIA domain containing 1 [Source:MGI Symbol;Acc:MGI:1915345]	chr5:73304127-73305159	ENSMUSG00000029152.13	chr5	73304127	73305159	+	1033	0.267686	1.8306
Pdha1	pyruvate dehydrogenase E1 alpha 1 [Source:MGI Symbol;Acc:MGI:97532]	chrX:160129410-160129501	ENSMUSG00000031299.10	chrX	160129410	160129501	-	92	0.267418	2.8561
Faxc	failed axon connections homolog [Source:MGI Symbol;Acc:MGI:1923382]	chr4:21931357-21931829	ENSMUSG00000028246.13	chr4	21931357	21931829	+	473	0.26733	2.06893
Plce1	phospholipase C, epsilon 1 [Source:MGI Symbol;Acc:MGI:1921305]	chr19:38734914-38738039	ENSMUSG00000024998.17	chr19	38734914	38738039	+	3126	0.267195	2.28939
Mier1	MEIR1 treanscription regulator [Source:MGI Symbol;Acc:MGI:1918398]	chr4:103140837-103142573	ENSMUSG00000028522.16	chr4	103140837	103142573	+	1737	0.266558	1.5797
Tmx2	thioredoxin-related transmembrane protein 2 [Source:MGI Symbol;Acc:MGI:1914208]	chr2:84678643-84678828	ENSMUSG00000050043.16	chr2	84678643	84678828	-	186	0.266529	2.40377
Opn3	opsin 3 [Source:MGI Symbol;Acc:MGI:1338022]	chr1:175665310-175665629	ENSMUSG00000026525.9	chr1	175665310	175665629	-	320	0.266326	2.45635
Park7	Parkinson disease (autosomal recessive, early onset) 7 [Source:MGI Symbol;Acc:MGI:2135637]	chr4:150913891-150914206	ENSMUSG00000028964.14	chr4	150913891	150914206	-	316	0.266314	1.33382
Arf3	ADP-ribosylation factor 3 [Source:MGI Symbol;Acc:MGI:99432]	chr15:98762980-98763211	ENSMUSG00000051853.10	chr15	98762980	98763211	-	232	0.265631	1.48784
Nr2f6	nuclear receptor subfamily 2, group F, member 6 [Source:MGI Symbol;Acc:MGI:1352453]	chr8:71375503-71375790	ENSMUSG00000002393.14	chr8	71375503	71375790	-	288	0.264399	2.35514
Ptpra	protein tyrosine phosphatase, receptor type, A [Source:MGI Symbol;Acc:MGI:97808]	chr2:130540483-130540649	ENSMUSG00000027303.18	chr2	130540483	130540649	+	167	0.264384	2.91438
Atp5pb	ATP synthase peripheral stalk-membrane subunit b [Source:MGI Symbol;Acc:MGI:1100495]	chr3:105958591-105958898	ENSMUSG00000000563.17	chr3	105958591	105958898	-	308	0.264312	1.71737
Rps16	ribosomal protein S16 [Source:MGI Symbol;Acc:MGI:98118]	chr7:28350924-28351093	ENSMUSG00000037563.15	chr7	28350924	28351093	+	170	0.263908	1.35818
Ece1	endothelin converting enzyme 1 [Source:MGI Symbol;Acc:MGI:1101357]	chr4:137957135-137957202	ENSMUSG00000057530.14	chr4	137957135	137957202	+	68	0.263469	2.94348
Mest	mesoderm specific transcript [Source:MGI Symbol;Acc:MGI:96968]	chr6:30742716-30742852	ENSMUSG00000051855.15	chr6	30742716	30742852	+	137	0.263441	2.00376
Cct5	chaperonin containing Tcp1, subunit 5 (epsilon) [Source:MGI Symbol;Acc:MGI:107185]	chr15:31601302-31601539	ENSMUSG00000022234.15	chr15	31601302	31601539	-	238	0.263363	1.25357
Ptpra	protein tyrosine phosphatase, receptor type, A [Source:MGI Symbol;Acc:MGI:97808]	chr2:130540337-130541019	ENSMUSG00000027303.18	chr2	130540337	130541019	+	683	0.263338	2.8954
Grk6	G protein-coupled receptor kinase 6 [Source:MGI Symbol;Acc:MGI:1347078]	chr13:55459013-55459147	ENSMUSG00000074886.11	chr13	55459013	55459147	+	135	0.262931	2.53562
Ltbp3	latent transforming growth factor beta binding protein 3 [Source:MGI Symbol;Acc:MGI:1101355]	chr19:5755616-5755674	ENSMUSG00000024940.11	chr19	5755616	5755674	+	59	0.262674	2.8658
Psenen	presenilin enhancer gamma secretase subunit [Source:MGI Symbol;Acc:MGI:1913590]	chr7:30562641-30562759	ENSMUSG00000036835.7	chr7	30562641	30562759	-	119	0.26254	0.921649
Ralgapa1	Ral GTPase activating protein, alpha subunit 1 [Source:MGI Symbol;Acc:MGI:1931050]	chr12:55709514-55709707	ENSMUSG00000021027.17	chr12	55709514	55709707	-	194	0.262115	2.50323
Psma6	proteasome subunit alpha 6 [Source:MGI Symbol;Acc:MGI:1347006]	chr12:55414404-55414498	ENSMUSG00000021024.14	chr12	55414404	55414498	+	95	0.262066	2.21873
Cib2	calcium and integrin binding family member 2 [Source:MGI Symbol;Acc:MGI:1929293]	chr9:54559968-54560218	ENSMUSG00000037493.6	chr9	54559968	54560218	-	251	0.261244	1.83495
Mest	mesoderm specific transcript [Source:MGI Symbol;Acc:MGI:96968]	chr6:30742716-30742836	ENSMUSG00000051855.15	chr6	30742716	30742836	+	121	0.261189	1.99641
Eno1	enolase 1, alpha non-neuron [Source:MGI Symbol;Acc:MGI:95393]	chr4:150247831-150247939	ENSMUSG00000063524.13	chr4	150247831	150247939	+	109	0.261157	2.0933
Kat7	K(lysine) acetyltransferase 7 [Source:MGI Symbol;Acc:MGI:2182799]	chr11:95301530-95303309	ENSMUSG00000038909.16	chr11	95301530	95303309	-	1780	0.260745	1.70222
Rnf126	ring finger protein 126 [Source:MGI Symbol;Acc:MGI:1917544]	chr10:79760791-79760906	ENSMUSG00000035890.9	chr10	79760791	79760906	-	116	0.260328	4.2615
Ptgr2	prostaglandin reductase 2 [Source:MGI Symbol;Acc:MGI:1916372]	chr12:84298011-84298366	ENSMUSG00000072946.12	chr12	84298011	84298366	+	356	0.259402	2.60135
Ptgr2	prostaglandin reductase 2 [Source:MGI Symbol;Acc:MGI:1916372]	chr12:84298011-84298202	ENSMUSG00000072946.12	chr12	84298011	84298202	+	192	0.259402	2.60135
Glyr1	glyoxylate reductase 1 homolog (Arabidopsis) [Source:MGI Symbol;Acc:MGI:1921272]	chr16:5018400-5018524	ENSMUSG00000022536.14	chr16	5018400	5018524	-	125	0.259131	2.76032
Ints10	integrator complex subunit 10 [Source:MGI Symbol;Acc:MGI:1918135]	chr8:68811911-68811993	ENSMUSG00000031864.16	chr8	68811911	68811993	+	83	0.259046	2.48084
Kdm1a	lysine (K)-specific demethylase 1A [Source:MGI Symbol;Acc:MGI:1196256]	chr4:136553121-136553910	ENSMUSG00000036940.15	chr4	136553121	136553910	-	790	0.259019	1.29941
Cul5	cullin 5 [Source:MGI Symbol;Acc:MGI:1922967]	chr9:53632273-53633839	ENSMUSG00000032030.16	chr9	53632273	53633839	-	1567	0.257937	1.64853
Sgms1	sphingomyelin synthase 1 [Source:MGI Symbol;Acc:MGI:2444110]	chr19:32220587-32223590	ENSMUSG00000040451.18	chr19	32220587	32223590	-	3004	0.257885	1.43089
Hunk	hormonally upregulated Neu-associated kinase [Source:MGI Symbol;Acc:MGI:1347352]	chr16:90386013-90386716	ENSMUSG00000053414.8	chr16	90386013	90386716	+	704	0.257197	1.82507
Amz2	archaelysin family metallopeptidase 2 [Source:MGI Symbol;Acc:MGI:104837]	chr11:109434580-109434730	ENSMUSG00000020610.17	chr11	109434580	109434730	+	151	0.256861	2.77312
Scd1	stearoyl-Coenzyme A desaturase 1 [Source:MGI Symbol;Acc:MGI:98239]	chr19:44400142-44400374	ENSMUSG00000037071.3	chr19	44400142	44400374	-	233	0.25666	2.14611
Amz2	archaelysin family metallopeptidase 2 [Source:MGI Symbol;Acc:MGI:104837]	chr11:109434580-109434756	ENSMUSG00000020610.17	chr11	109434580	109434756	+	177	0.255934	2.70271
Robo2	roundabout guidance receptor 2 [Source:MGI Symbol;Acc:MGI:1890110]	chr16:73920534-73920794	ENSMUSG00000052516.19	chr16	73920534	73920794	-	261	0.25591	4.84122
Zfp787	zinc finger protein 787 [Source:MGI Symbol;Acc:MGI:1914359]	chr7:6142353-6143150	ENSMUSG00000046792.8	chr7	6142353	6143150	-	798	0.255681	1.97968
Snrnp40	small nuclear ribonucleoprotein 40 (U5) [Source:MGI Symbol;Acc:MGI:1913835]	chr4:130365075-130365432	ENSMUSG00000074088.6	chr4	130365075	130365432	+	358	0.254619	2.40482
Rps8	ribosomal protein S8 [Source:MGI Symbol;Acc:MGI:98166]	chr4:117154299-117154497	ENSMUSG00000047675.15	chr4	117154299	117154497	-	199	0.254212	2.60902
Dgkd	diacylglycerol kinase, delta [Source:MGI Symbol;Acc:MGI:2138334]	chr1:87916807-87916932	ENSMUSG00000070738.10	chr1	87916807	87916932	+	126	0.254145	2.16972
Rplp2	ribosomal protein, large P2 [Source:MGI Symbol;Acc:MGI:1914436]	chr7:141451232-141451585	ENSMUSG00000025508.13	chr7	141451232	141451585	+	354	0.253058	1.5432
Plxnb2	plexin B2 [Source:MGI Symbol;Acc:MGI:2154239]	chr15:89160161-89160261	ENSMUSG00000036606.17	chr15	89160161	89160261	-	101	0.252991	2.22837
Sap30l	SAP30-like [Source:MGI Symbol;Acc:MGI:1354709]	chr11:57801637-57802289	ENSMUSG00000020519.5	chr11	57801637	57802289	+	653	0.2529	1.88178
Slco1c1	solute carrier organic anion transporter family, member 1c1 [Source:MGI Symbol;Acc:MGI:1889679]	chr6:141542092-141542238	ENSMUSG00000030235.17	chr6	141542092	141542238	+	147	0.252726	3.73318
Elapor2	endosome-lysosome associated apoptosis and autophagy regulator family member 2 [Source:MGI Symbol;Acc:MGI:2443264]	chr5:9421505-9421657	ENSMUSG00000056004.16	chr5	9421505	9421657	+	153	0.252349	2.421
Arpp19	cAMP-regulated phosphoprotein 19 [Source:MGI Symbol;Acc:MGI:1891691]	chr9:75037907-75038473	ENSMUSG00000007656.13	chr9	75037907	75038473	+	567	0.251822	2.11845
Phf1	PHD finger protein 1 [Source:MGI Symbol;Acc:MGI:98647]	chr17:26936287-26936680	ENSMUSG00000024193.8	chr17	26936287	26936680	+	394	0.251673	1.94045
Slc39a6	solute carrier family 39 (metal ion transporter), member 6 [Source:MGI Symbol;Acc:MGI:2147279]	chr18:24582317-24582507	ENSMUSG00000024270.11	chr18	24582317	24582507	-	191	0.251298	1.99505
Rasgef1b	RasGEF domain family, member 1B [Source:MGI Symbol;Acc:MGI:2443755]	chr5:99723455-99725571	ENSMUSG00000089809.9	chr5	99723455	99725571	-	2117	0.251239	1.10596
Elavl1	ELAV (embryonic lethal, abnormal vision)-like 1 (Hu antigen R) [Source:MGI Symbol;Acc:MGI:1100851]	chr8:4324886-4325413	ENSMUSG00000040028.10	chr8	4324886	4325413	-	528	0.250492	2.09306
Pex3	peroxisomal biogenesis factor 3 [Source:MGI Symbol;Acc:MGI:1929646]	chr10:13552826-13553142	ENSMUSG00000019809.16	chr10	13552826	13553142	-	317	0.250123	2.51357
Plk2	polo like kinase 2 [Source:MGI Symbol;Acc:MGI:1099790]	chr13:110397688-110397886	ENSMUSG00000021701.8	chr13	110397688	110397886	+	199	0.249891	2.22722
Tpi1	triosephosphate isomerase 1 [Source:MGI Symbol;Acc:MGI:98797]	chr6:124811272-124811387	ENSMUSG00000023456.16	chr6	124811272	124811387	-	116	0.249704	2.92767
Ciao1	cytosolic iron-sulfur protein assembly 1 [Source:MGI Symbol;Acc:MGI:1346998]	chr2:127242869-127243037	ENSMUSG00000003662.10	chr2	127242869	127243037	-	169	0.249532	2.54763
Eif3b	eukaryotic translation initiation factor 3, subunit B [Source:MGI Symbol;Acc:MGI:106478]	chr5:140439913-140440051	ENSMUSG00000056076.13	chr5	140439913	140440051	+	139	0.249514	1.8065
Anapc2	anaphase promoting complex subunit 2 [Source:MGI Symbol;Acc:MGI:2139135]	chr2:25280127-25280202	ENSMUSG00000026965.12	chr2	25280127	25280202	+	76	0.248359	2.86107
Abhd17c	abhydrolase domain containing 17C [Source:MGI Symbol;Acc:MGI:1917428]	chr7:84149091-84151670	ENSMUSG00000038459.10	chr7	84149091	84151670	-	2580	0.2476	1.48583
Slc39a6	solute carrier family 39 (metal ion transporter), member 6 [Source:MGI Symbol;Acc:MGI:2147279]	chr18:24582308-24582507	ENSMUSG00000024270.11	chr18	24582308	24582507	-	200	0.247536	2.04476
Apba2	amyloid beta (A4) precursor protein-binding, family A, member 2 [Source:MGI Symbol;Acc:MGI:1261791]	chr7:64744416-64744628	ENSMUSG00000030519.14	chr7	64744416	64744628	+	213	0.247441	3.29083
Atp6v1h	ATPase, H+ transporting, lysosomal V1 subunit H [Source:MGI Symbol;Acc:MGI:1914864]	chr1:5084417-5086779	ENSMUSG00000033793.12	chr1	5084417	5086779	+	2363	0.247364	1.71787
Wrap53	WD repeat containing, antisense to Trp53 [Source:MGI Symbol;Acc:MGI:2384933]	chr11:69562122-69562259	ENSMUSG00000041346.11	chr11	69562122	69562259	-	138	0.246911	2.46837
Klhl3	kelch-like 3 [Source:MGI Symbol;Acc:MGI:2445185]	chr13:58018797-58018994	ENSMUSG00000014164.15	chr13	58018797	58018994	-	198	0.246659	3.89739
Dpp8	dipeptidylpeptidase 8 [Source:MGI Symbol;Acc:MGI:1921638]	chr9:65075003-65075128	ENSMUSG00000032393.15	chr9	65075003	65075128	+	126	0.246125	1.45574
Ehbp1	EH domain binding protein 1 [Source:MGI Symbol;Acc:MGI:2667252]	chr11:22068359-22068506	ENSMUSG00000042302.14	chr11	22068359	22068506	-	148	0.246014	2.28687
C1qbp	complement component 1, q subcomponent binding protein [Source:MGI Symbol;Acc:MGI:1194505]	chr11:70981010-70983007	ENSMUSG00000018446.8	chr11	70981010	70983007	-	1998	0.245824	1.58343
Atp5g3	ATP synthase, H+ transporting, mitochondrial F0 complex, subunit C3 (subunit 9) [Source:MGI Symbol;Acc:MGI:2442035]	chr2:73909864-73910459	ENSMUSG00000018770.9	chr2	73909864	73910459	-	596	0.245622	2.27223
Frmd6	FERM domain containing 6 [Source:MGI Symbol;Acc:MGI:2442579]	chr12:70893607-70893942	ENSMUSG00000048285.9	chr12	70893607	70893942	+	336	0.245526	2.40709
Pex3	peroxisomal biogenesis factor 3 [Source:MGI Symbol;Acc:MGI:1929646]	chr10:13552826-13553139	ENSMUSG00000019809.16	chr10	13552826	13553139	-	314	0.245521	2.49752
Zfp653	zinc finger protein 653 [Source:MGI Symbol;Acc:MGI:2442362]	chr9:22057287-22057398	ENSMUSG00000038895.16	chr9	22057287	22057398	-	112	0.245478	2.71936
Prkar2b	protein kinase, cAMP dependent regulatory, type II beta [Source:MGI Symbol;Acc:MGI:97760]	chr12:31963898-31963963	ENSMUSG00000002997.15	chr12	31963898	31963963	-	66	0.245363	2.17773
Rpl7	ribosomal protein L7 [Source:MGI Symbol;Acc:MGI:98073]	chr1:16101727-16102082	ENSMUSG00000043716.13	chr1	16101727	16102082	-	356	0.24526	1.55389
Prdm12	PR domain containing 12 [Source:MGI Symbol;Acc:MGI:2685844]	chr2:31654069-31655795	ENSMUSG00000079466.2	chr2	31654069	31655795	+	1727	0.244934	2.76408
Ercc5	excision repair cross-complementing rodent repair deficiency, complementation group 5 [Source:MGI Symbol;Acc:MGI:103582]	chr1:44147744-44149522	ENSMUSG00000026048.16	chr1	44147744	44149522	+	1779	0.244729	1.14095
Prdx2	peroxiredoxin 2 [Source:MGI Symbol;Acc:MGI:109486]	chr8:84969611-84969762	ENSMUSG00000005161.15	chr8	84969611	84969762	+	152	0.244401	2.18071
Tlcd4	TLC domain containing 4 [Source:MGI Symbol;Acc:MGI:1923195]	chr3:121262700-121263314	ENSMUSG00000028132.15	chr3	121262700	121263314	-	615	0.244059	2.3159
Sap130	Sin3A associated protein [Source:MGI Symbol;Acc:MGI:1919782]	chr18:31635982-31639380	ENSMUSG00000024260.14	chr18	31635982	31639380	+	3399	0.243853	0.693467
Ncald	neurocalcin delta [Source:MGI Symbol;Acc:MGI:1196326]	chr15:37792134-37792570	ENSMUSG00000051359.15	chr15	37792134	37792570	-	437	0.243472	1.00483
Lrp11	low density lipoprotein receptor-related protein 11 [Source:MGI Symbol;Acc:MGI:2442989]	chr10:7608544-7608639	ENSMUSG00000019796.12	chr10	7608544	7608639	+	96	0.243355	2.32707
Lrp11	low density lipoprotein receptor-related protein 11 [Source:MGI Symbol;Acc:MGI:2442989]	chr10:7608548-7608639	ENSMUSG00000019796.12	chr10	7608548	7608639	+	92	0.243355	2.32707
Dpp7	dipeptidylpeptidase 7 [Source:MGI Symbol;Acc:MGI:1933213]	chr2:25353608-25353726	ENSMUSG00000026958.13	chr2	25353608	25353726	-	119	0.242805	3.28476
Rxylt1	ribitol xylosyltransferase 1 [Source:MGI Symbol;Acc:MGI:2384919]	chr10:122095939-122096094	ENSMUSG00000034620.17	chr10	122095939	122096094	-	156	0.242394	3.19721
Stx18	syntaxin 18 [Source:MGI Symbol;Acc:MGI:1918366]	chr5:38120909-38121299	ENSMUSG00000029125.14	chr5	38120909	38121299	+	391	0.241489	1.44346
Rxylt1	ribitol xylosyltransferase 1 [Source:MGI Symbol;Acc:MGI:2384919]	chr10:122095939-122096136	ENSMUSG00000034620.17	chr10	122095939	122096136	-	198	0.241409	3.34156
Slc25a12	solute carrier family 25 (mitochondrial carrier, Aralar), member 12 [Source:MGI Symbol;Acc:MGI:1926080]	chr2:71296665-71296823	ENSMUSG00000027010.16	chr2	71296665	71296823	-	159	0.241219	2.83175
Map3k3	mitogen-activated protein kinase kinase kinase 3 [Source:MGI Symbol;Acc:MGI:1346874]	chr11:106096991-106097112	ENSMUSG00000020700.11	chr11	106096991	106097112	+	122	0.240839	2.56039
Gnl3	guanine nucleotide binding protein-like 3 (nucleolar) [Source:MGI Symbol;Acc:MGI:1353651]	chr14:31017276-31019093	ENSMUSG00000042354.7	chr14	31017276	31019093	-	1818	0.240521	1.84788
Aldoa	aldolase A, fructose-bisphosphate [Source:MGI Symbol;Acc:MGI:87994]	chr7:126800505-126800751	ENSMUSG00000030695.16	chr7	126800505	126800751	-	247	0.239446	0.688553
Poli	polymerase (DNA directed), iota [Source:MGI Symbol;Acc:MGI:1347081]	chr18:70524731-70525528	ENSMUSG00000038425.18	chr18	70524731	70525528	-	798	0.239439	1.64454
Gpi1	glucose-6-phosphate isomerase 1 [Source:MGI Symbol;Acc:MGI:95797]	chr7:34208250-34210377	ENSMUSG00000036427.5	chr7	34208250	34210377	-	2128	0.239406	1.13748
Sec23a	SEC23 homolog A, COPII coat complex component [Source:MGI Symbol;Acc:MGI:1349635]	chr12:58966615-58967045	ENSMUSG00000020986.13	chr12	58966615	58967045	-	431	0.239398	1.5172
Frmd6	FERM domain containing 6 [Source:MGI Symbol;Acc:MGI:2442579]	chr12:70894877-70895008	ENSMUSG00000048285.9	chr12	70894877	70895008	+	132	0.239096	2.02542
Slf1	SMC5-SMC6 complex localization factor 1 [Source:MGI Symbol;Acc:MGI:2145448]	chr13:77066600-77066747	ENSMUSG00000021597.16	chr13	77066600	77066747	-	148	0.23859	2.26747
Rpl29	ribosomal protein L29 [Source:MGI Symbol;Acc:MGI:99687]	chr9:106431429-106431567	ENSMUSG00000048758.14	chr9	106431429	106431567	+	139	0.238498	3.47508
Nol4l	nucleolar protein 4-like [Source:MGI Symbol;Acc:MGI:1918765]	chr2:153529442-153529971	ENSMUSG00000061411.12	chr2	153529442	153529971	-	530	0.237908	1.68894
Rfxank	regulatory factor X-associated ankyrin-containing protein [Source:MGI Symbol;Acc:MGI:1333865]	chr8:70134440-70134678	ENSMUSG00000036120.10	chr8	70134440	70134678	-	239	0.236621	1.7318
Ager	advanced glycosylation end product-specific receptor [Source:MGI Symbol;Acc:MGI:893592]	chr17:34599346-34599476	ENSMUSG00000015452.14	chr17	34599346	34599476	+	131	0.236526	2.18079
Elk3	ELK3, member of ETS oncogene family [Source:MGI Symbol;Acc:MGI:101762]	chr10:93254689-93254811	ENSMUSG00000008398.16	chr10	93254689	93254811	-	123	0.23627	3.34922
Cox11	cytochrome c oxidase assembly protein 11, copper chaperone [Source:MGI Symbol;Acc:MGI:1917052]	chr11:90640377-90640532	ENSMUSG00000020544.14	chr11	90640377	90640532	+	156	0.235844	2.66064
Nphp1	nephronophthisis 1 (juvenile) homolog (human) [Source:MGI Symbol;Acc:MGI:1858233]	chr2:127745622-127745969	ENSMUSG00000027378.16	chr2	127745622	127745969	-	348	0.235504	1.65172
Eif4h	eukaryotic translation initiation factor 4H [Source:MGI Symbol;Acc:MGI:1341822]	chr5:134621949-134622086	ENSMUSG00000040731.13	chr5	134621949	134622086	-	138	0.235479	2.29183
Cc2d1b	coiled-coil and C2 domain containing 1B [Source:MGI Symbol;Acc:MGI:2443076]	chr4:108630278-108630306	ENSMUSG00000028582.14	chr4	108630278	108630306	+	29	0.235366	2.80966
Brsk2	BR serine/threonine kinase 2 [Source:MGI Symbol;Acc:MGI:1923020]	chr7:142000842-142000889	ENSMUSG00000053046.16	chr7	142000842	142000889	+	48	0.235324	2.91879
Ophn1	oligophrenin 1 [Source:MGI Symbol;Acc:MGI:2151070]	chrX:98558251-98558405	ENSMUSG00000031214.13	chrX	98558251	98558405	-	155	0.235294	2.8241
Ccn3	cellular communication network factor 3 [Source:MGI Symbol;Acc:MGI:109185]	chr15:54749150-54749364	ENSMUSG00000037362.8	chr15	54749150	54749364	+	215	0.23501	2.20868
Ccdc136	coiled-coil domain containing 136 [Source:MGI Symbol;Acc:MGI:1918128]	chr6:29396630-29396742	ENSMUSG00000029769.16	chr6	29396630	29396742	+	113	0.234485	1.67814
Hmox2	heme oxygenase 2 [Source:MGI Symbol;Acc:MGI:109373]	chr16:4765978-4766742	ENSMUSG00000004070.15	chr16	4765978	4766742	+	765	0.234411	2.08212
Eif3f	eukaryotic translation initiation factor 3, subunit F [Source:MGI Symbol;Acc:MGI:1913335]	chr7:108938036-108938115	ENSMUSG00000031029.6	chr7	108938036	108938115	+	80	0.234255	2.30511
Mrpl44	mitochondrial ribosomal protein L44 [Source:MGI Symbol;Acc:MGI:1916413]	chr1:79776018-79776311	ENSMUSG00000026248.9	chr1	79776018	79776311	+	294	0.233129	1.43955
Syt5	synaptotagmin V [Source:MGI Symbol;Acc:MGI:1926368]	chr7:4547313-4547541	ENSMUSG00000004961.7	chr7	4547313	4547541	-	229	0.231922	1.76845
Fkbp8	FK506 binding protein 8 [Source:MGI Symbol;Acc:MGI:1341070]	chr8:70527724-70527836	ENSMUSG00000019428.16	chr8	70527724	70527836	+	113	0.231434	1.09353
Mettl23	methyltransferase like 23 [Source:MGI Symbol;Acc:MGI:1921569]	chr11:116854000-116854263	ENSMUSG00000090266.10	chr11	116854000	116854263	+	264	0.230579	1.86207
Cox11	cytochrome c oxidase assembly protein 11, copper chaperone [Source:MGI Symbol;Acc:MGI:1917052]	chr11:90640178-90640532	ENSMUSG00000020544.14	chr11	90640178	90640532	+	355	0.230194	2.53465
Meg3	maternally expressed 3 [Source:MGI Symbol;Acc:MGI:1202886]	chr12:109549255-109549552	ENSMUSG00000021268.17	chr12	109549255	109549552	+	298	0.230118	1.69508
Rnaseh2c	ribonuclease H2, subunit C [Source:MGI Symbol;Acc:MGI:1915459]	chr19:5602193-5602374	ENSMUSG00000024925.11	chr19	5602193	5602374	+	182	0.230014	2.43028
Sgtb	small glutamine-rich tetratricopeptide repeat (TPR)-containing, beta [Source:MGI Symbol;Acc:MGI:2444615]	chr13:104121467-104121536	ENSMUSG00000042743.13	chr13	104121467	104121536	+	70	0.229992	2.01818
Ankrd11	ankyrin repeat domain 11 [Source:MGI Symbol;Acc:MGI:1924337]	chr8:122885650-122885742	ENSMUSG00000035569.17	chr8	122885650	122885742	-	93	0.229559	2.99809
Ndrg3	N-myc downstream regulated gene 3 [Source:MGI Symbol;Acc:MGI:1352499]	chr2:156931430-156931465	ENSMUSG00000027634.14	chr2	156931430	156931465	-	36	0.229141	1.67745
Noa1	nitric oxide associated 1 [Source:MGI Symbol;Acc:MGI:1914306]	chr5:77304980-77306476	ENSMUSG00000036285.10	chr5	77304980	77306476	-	1497	0.229016	1.66346
Cul4a	cullin 4A [Source:MGI Symbol;Acc:MGI:1914487]	chr8:13139843-13140316	ENSMUSG00000031446.14	chr8	13139843	13140316	+	474	0.228606	1.95193
Shfl	shiftless antiviral inhibitor of ribosomal frameshifting [Source:MGI Symbol;Acc:MGI:2441788]	chr9:20873110-20873264	ENSMUSG00000038884.14	chr9	20873110	20873264	+	155	0.228221	2.71746
Atp5k	ATP synthase, H+ transporting, mitochondrial F1F0 complex, subunit E [Source:MGI Symbol;Acc:MGI:106636]	chr5:108433244-108433337	ENSMUSG00000050856.16	chr5	108433244	108433337	-	94	0.228152	1.7771
Atp5k	ATP synthase, H+ transporting, mitochondrial F1F0 complex, subunit E [Source:MGI Symbol;Acc:MGI:106636]	chr5:108433246-108433337	ENSMUSG00000050856.16	chr5	108433246	108433337	-	92	0.228152	1.7771
Tmem132a	transmembrane protein 132A [Source:MGI Symbol;Acc:MGI:2147810]	chr19:10859564-10859755	ENSMUSG00000024736.15	chr19	10859564	10859755	-	192	0.227988	2.25047
Cgref1	cell growth regulator with EF hand domain 1 [Source:MGI Symbol;Acc:MGI:1915817]	chr5:30934160-30934281	ENSMUSG00000029161.7	chr5	30934160	30934281	-	122	0.227875	2.66159
Vdac2	voltage-dependent anion channel 2 [Source:MGI Symbol;Acc:MGI:106915]	chr14:21831269-21831667	ENSMUSG00000021771.14	chr14	21831269	21831667	+	399	0.227858	1.41939
Smarcd3	SWI/SNF related, matrix associated, actin dependent regulator of chromatin, subfamily d, member 3 [Source:MGI Symbol;Acc:MGI:1914243]	chr5:24596807-24596849	ENSMUSG00000028949.13	chr5	24596807	24596849	-	43	0.227281	2.26959
Plxna3	plexin A3 [Source:MGI Symbol;Acc:MGI:107683]	chrX:74336719-74336855	ENSMUSG00000031398.13	chrX	74336719	74336855	+	137	0.227098	1.76415
Alkbh1	alkB homolog 1, histone H2A dioxygenase [Source:MGI Symbol;Acc:MGI:2384034]	chr12:87431400-87431536	ENSMUSG00000079036.10	chr12	87431400	87431536	-	137	0.226778	3.12358
Mrtfa	myocardin related transcription factor A [Source:MGI Symbol;Acc:MGI:2384495]	chr15:81015349-81015409	ENSMUSG00000042292.18	chr15	81015349	81015409	-	61	0.226489	2.33803
Tmem200c	transmembrane protein 200C [Source:MGI Symbol;Acc:MGI:3646281]	chr17:68837136-68837533	ENSMUSG00000095407.2	chr17	68837136	68837533	+	398	0.226125	1.87362
Ap3b2	adaptor-related protein complex 3, beta 2 subunit [Source:MGI Symbol;Acc:MGI:1100869]	chr7:81463684-81463912	ENSMUSG00000062444.15	chr7	81463684	81463912	-	229	0.22576	2.73489
Ankrd24	ankyrin repeat domain 24 [Source:MGI Symbol;Acc:MGI:1890394]	chr10:81636369-81636421	ENSMUSG00000054708.17	chr10	81636369	81636421	+	53	0.224759	2.18223
Ankrd24	ankyrin repeat domain 24 [Source:MGI Symbol;Acc:MGI:1890394]	chr10:81636369-81636426	ENSMUSG00000054708.17	chr10	81636369	81636426	+	58	0.224759	2.18223
Myo10	myosin X [Source:MGI Symbol;Acc:MGI:107716]	chr15:25801123-25801280	ENSMUSG00000022272.17	chr15	25801123	25801280	+	158	0.224444	2.46982
Pfkfb3	6-phosphofructo-2-kinase/fructose-2,6-biphosphatase 3 [Source:MGI Symbol;Acc:MGI:2181202]	chr2:11474393-11474543	ENSMUSG00000026773.19	chr2	11474393	11474543	-	151	0.22444	2.85472
Ttbk1	tau tubulin kinase 1 [Source:MGI Symbol;Acc:MGI:2147036]	chr17:46487426-46487675	ENSMUSG00000015599.9	chr17	46487426	46487675	-	250	0.224217	1.98061
Acly	ATP citrate lyase [Source:MGI Symbol;Acc:MGI:103251]	chr11:100482145-100482299	ENSMUSG00000020917.17	chr11	100482145	100482299	-	155	0.224181	1.93335
Ubap2	ubiquitin-associated protein 2 [Source:MGI Symbol;Acc:MGI:1916176]	chr4:41199494-41199585	ENSMUSG00000028433.14	chr4	41199494	41199585	-	92	0.224019	2.18734
Dcaf11	DDB1 and CUL4 associated factor 11 [Source:MGI Symbol;Acc:MGI:90168]	chr14:55565098-55565541	ENSMUSG00000022214.15	chr14	55565098	55565541	+	444	0.224013	1.76947
Rrp9	ribosomal RNA processing 9, U3 small nucleolar RNA binding protein [Source:MGI Symbol;Acc:MGI:2384313]	chr9:106482912-106483036	ENSMUSG00000041506.15	chr9	106482912	106483036	+	125	0.22401	2.47192
Swsap1	SWIM type zinc finger 7 associated protein 1 [Source:MGI Symbol;Acc:MGI:1914212]	chr9:21955755-21956004	ENSMUSG00000051238.6	chr9	21955755	21956004	+	250	0.223698	2.14372
Slc26a6	solute carrier family 26, member 6 [Source:MGI Symbol;Acc:MGI:2159728]	chr9:108857825-108857972	ENSMUSG00000023259.16	chr9	108857825	108857972	+	148	0.223376	2.05251
Ephb1	Eph receptor B1 [Source:MGI Symbol;Acc:MGI:1096337]	chr9:101929267-101929460	ENSMUSG00000032537.15	chr9	101929267	101929460	-	194	0.223373	2.76024
Alkbh1	alkB homolog 1, histone H2A dioxygenase [Source:MGI Symbol;Acc:MGI:2384034]	chr12:87431400-87431538	ENSMUSG00000079036.10	chr12	87431400	87431538	-	139	0.222685	2.84774
Mia3	MIA SH3 domain ER export factor 3 [Source:MGI Symbol;Acc:MGI:2443183]	chr1:183331304-183331371	ENSMUSG00000056050.13	chr1	183331304	183331371	-	68	0.22241	3.77209
Gria4	glutamate receptor, ionotropic, AMPA4 (alpha 4) [Source:MGI Symbol;Acc:MGI:95811]	chr9:4795845-4796234	ENSMUSG00000025892.16	chr9	4795845	4796234	-	390	0.221997	2.05093
Phf7	PHD finger protein 7 [Source:MGI Symbol;Acc:MGI:1919088]	chr14:31250705-31251315	ENSMUSG00000021902.7	chr14	31250705	31251315	-	611	0.221996	2.63101
Gle1	GLE1 RNA export mediator (yeast) [Source:MGI Symbol;Acc:MGI:1921662]	chr2:29938495-29938955	ENSMUSG00000019715.14	chr2	29938495	29938955	+	461	0.221952	1.84637
Ttc13	tetratricopeptide repeat domain 13 [Source:MGI Symbol;Acc:MGI:2384573]	chr8:124673657-124674220	ENSMUSG00000037300.19	chr8	124673657	124674220	-	564	0.221923	2.53692
Tvp23b	trans-golgi network vesicle protein 23B [Source:MGI Symbol;Acc:MGI:1914760]	chr11:62885076-62885346	ENSMUSG00000014177.10	chr11	62885076	62885346	+	271	0.221304	2.57168
Pck2	phosphoenolpyruvate carboxykinase 2 (mitochondrial) [Source:MGI Symbol;Acc:MGI:1860456]	chr14:55540467-55543265	ENSMUSG00000040618.7	chr14	55540467	55543265	+	2799	0.220413	1.67266
Enpp2	ectonucleotide pyrophosphatase/phosphodiesterase 2 [Source:MGI Symbol;Acc:MGI:1321390]	chr15:54859798-54860094	ENSMUSG00000022425.16	chr15	54859798	54860094	-	297	0.220341	1.82507
Eif3b	eukaryotic translation initiation factor 3, subunit B [Source:MGI Symbol;Acc:MGI:106478]	chr5:140439942-140440051	ENSMUSG00000056076.13	chr5	140439942	140440051	+	110	0.220126	1.96098
Maged2	MAGE family member D2 [Source:MGI Symbol;Acc:MGI:1933391]	chrX:150808721-150809152	ENSMUSG00000025268.15	chrX	150808721	150809152	-	432	0.219787	1.60043
Rpl41	ribosomal protein L41 [Source:MGI Symbol;Acc:MGI:1915195]	chr10:128549088-128549138	ENSMUSG00000093674.7	chr10	128549088	128549138	-	51	0.219518	0.392158
Lrp4	low density lipoprotein receptor-related protein 4 [Source:MGI Symbol;Acc:MGI:2442252]	chr2:91477521-91480871	ENSMUSG00000027253.15	chr2	91477521	91480871	+	3351	0.219459	3.53235
Sh3gl3	SH3-domain GRB2-like 3 [Source:MGI Symbol;Acc:MGI:700011]	chr7:82276127-82276285	ENSMUSG00000030638.13	chr7	82276127	82276285	+	159	0.219167	2.7938
Fads3	fatty acid desaturase 3 [Source:MGI Symbol;Acc:MGI:1928740]	chr19:10041665-10041956	ENSMUSG00000024664.5	chr19	10041665	10041956	+	292	0.219119	1.72597
Phf7	PHD finger protein 7 [Source:MGI Symbol;Acc:MGI:1919088]	chr14:31250705-31251317	ENSMUSG00000021902.7	chr14	31250705	31251317	-	613	0.218498	2.92042
Tvp23b	trans-golgi network vesicle protein 23B [Source:MGI Symbol;Acc:MGI:1914760]	chr11:62885076-62885165	ENSMUSG00000014177.10	chr11	62885076	62885165	+	90	0.218112	2.52498
Rragd	Ras-related GTP binding D [Source:MGI Symbol;Acc:MGI:1098604]	chr4:32983037-32983607	ENSMUSG00000028278.14	chr4	32983037	32983607	+	571	0.217862	1.7672
Hdac3	histone deacetylase 3 [Source:MGI Symbol;Acc:MGI:1343091]	chr18:37941878-37941967	ENSMUSG00000024454.16	chr18	37941878	37941967	-	90	0.217696	2.20696
Nprl3	nitrogen permease regulator-like 3 [Source:MGI Symbol;Acc:MGI:109258]	chr11:32247779-32248226	ENSMUSG00000020289.15	chr11	32247779	32248226	-	448	0.217671	1.77475
Cd81	CD81 antigen [Source:MGI Symbol;Acc:MGI:1096398]	chr7:143067147-143067162	ENSMUSG00000037706.17	chr7	143067147	143067162	+	16	0.217659	2.39856
Coq10a	coenzyme Q10A [Source:MGI Symbol;Acc:MGI:2684847]	chr10:128368698-128368981	ENSMUSG00000039914.6	chr10	128368698	128368981	-	284	0.217174	2.27455
Tmem94	transmembrane protein 94 [Source:MGI Symbol;Acc:MGI:1919197]	chr11:115796736-115796817	ENSMUSG00000020747.18	chr11	115796736	115796817	+	82	0.21713	2.55866
Zfp318	zinc finger protein 318 [Source:MGI Symbol;Acc:MGI:1889348]	chr17:46410273-46410391	ENSMUSG00000015597.17	chr17	46410273	46410391	+	119	0.217046	2.18831
Slc25a11	solute carrier family 25 (mitochondrial carrier oxoglutarate carrier), member 11 [Source:MGI Symbol;Acc:MGI:1915113]	chr11:70646768-70646978	ENSMUSG00000014606.14	chr11	70646768	70646978	-	211	0.217017	1.74972
Slc25a11	solute carrier family 25 (mitochondrial carrier oxoglutarate carrier), member 11 [Source:MGI Symbol;Acc:MGI:1915113]	chr11:70646768-70647058	ENSMUSG00000014606.14	chr11	70646768	70647058	-	291	0.217017	1.74972
Ndufs3	NADH:ubiquinone oxidoreductase core subunit S3 [Source:MGI Symbol;Acc:MGI:1915599]	chr2:90898296-90898503	ENSMUSG00000005510.9	chr2	90898296	90898503	-	208	0.216914	1.79741
Brsk2	BR serine/threonine kinase 2 [Source:MGI Symbol;Acc:MGI:1923020]	chr7:142000842-142000886	ENSMUSG00000053046.16	chr7	142000842	142000886	+	45	0.216646	2.8471
Dlgap1	DLG associated protein 1 [Source:MGI Symbol;Acc:MGI:1346065]	chr17:70078262-70081019	ENSMUSG00000003279.17	chr17	70078262	70081019	+	2758	0.216593	1.11464
Mapk8ip1	mitogen-activated protein kinase 8 interacting protein 1 [Source:MGI Symbol;Acc:MGI:1309464]	chr2:92385147-92385263	ENSMUSG00000027223.15	chr2	92385147	92385263	-	117	0.216422	3.44096
Asap1	ArfGAP with SH3 domain, ankyrin repeat and PH domain1 [Source:MGI Symbol;Acc:MGI:1342335]	chr15:64158939-64159004	ENSMUSG00000022377.16	chr15	64158939	64159004	-	66	0.215895	1.86178
Phf7	PHD finger protein 7 [Source:MGI Symbol;Acc:MGI:1919088]	chr14:31250705-31251299	ENSMUSG00000021902.7	chr14	31250705	31251299	-	595	0.215497	2.6053
Lingo1	leucine rich repeat and Ig domain containing 1 [Source:MGI Symbol;Acc:MGI:1915522]	chr9:56635075-56635628	ENSMUSG00000049556.5	chr9	56635075	56635628	-	554	0.215446	1.63125
Rnaseh2c	ribonuclease H2, subunit C [Source:MGI Symbol;Acc:MGI:1915459]	chr19:5602235-5602374	ENSMUSG00000024925.11	chr19	5602235	5602374	+	140	0.21495	2.15905
Ap1ar	adaptor-related protein complex 1 associated regulatory protein [Source:MGI Symbol;Acc:MGI:2384822]	chr3:127823265-127825498	ENSMUSG00000074238.6	chr3	127823265	127825498	-	2234	0.214893	1.02363
Prdx6	peroxiredoxin 6 [Source:MGI Symbol;Acc:MGI:894320]	chr1:161248605-161251162	ENSMUSG00000026701.15	chr1	161248605	161251162	-	2558	0.213478	1.08629
Snapc1	small nuclear RNA activating complex, polypeptide 1 [Source:MGI Symbol;Acc:MGI:1922877]	chr12:73982638-73984107	ENSMUSG00000021113.5	chr12	73982638	73984107	+	1470	0.213254	2.01669
Atp5c1	ATP synthase, H+ transporting, mitochondrial F1 complex, gamma polypeptide 1 [Source:MGI Symbol;Acc:MGI:1261437]	chr2:10079620-10079859	ENSMUSG00000025781.14	chr2	10079620	10079859	-	240	0.213211	0.327424
Coq10a	coenzyme Q10A [Source:MGI Symbol;Acc:MGI:2684847]	chr10:128368698-128368997	ENSMUSG00000039914.6	chr10	128368698	128368997	-	300	0.212969	2.09009
Snx10	sorting nexin 10 [Source:MGI Symbol;Acc:MGI:1919232]	chr6:51562018-51568476	ENSMUSG00000038301.15	chr6	51562018	51568476	+	6459	0.212862	1.00607
Zmym3	zinc finger, MYM-type 3 [Source:MGI Symbol;Acc:MGI:1927231]	chrX:101410057-101410160	ENSMUSG00000031310.16	chrX	101410057	101410160	-	104	0.212465	3.12332
Tmem87b	transmembrane protein 87B [Source:MGI Symbol;Acc:MGI:1919727]	chr2:128841153-128842699	ENSMUSG00000014353.15	chr2	128841153	128842699	+	1547	0.212181	1.46997
Rell2	RELT-like 2 [Source:MGI Symbol;Acc:MGI:1918044]	chr18:37957089-37957155	ENSMUSG00000044024.16	chr18	37957089	37957155	+	67	0.212037	1.92372
Nfib	nuclear factor I/B [Source:MGI Symbol;Acc:MGI:103188]	chr4:82328594-82330426	ENSMUSG00000008575.17	chr4	82328594	82330426	-	1833	0.211518	1.60193
Snhg4	small nucleolar RNA host gene 4 [Source:MGI Symbol;Acc:MGI:4937091]	chr18:35553408-35554461	ENSMUSG00000117869.1	chr18	35553408	35554461	+	1054	0.211471	1.29215
Ndufs6	NADH:ubiquinone oxidoreductase core subunit S6 [Source:MGI Symbol;Acc:MGI:107932]	chr13:73319867-73320084	ENSMUSG00000021606.8	chr13	73319867	73320084	-	218	0.211408	2.19625
Ndufs6	NADH:ubiquinone oxidoreductase core subunit S6 [Source:MGI Symbol;Acc:MGI:107932]	chr13:73319874-73320060	ENSMUSG00000021606.8	chr13	73319874	73320060	-	187	0.211408	2.19625
Ndufs6	NADH:ubiquinone oxidoreductase core subunit S6 [Source:MGI Symbol;Acc:MGI:107932]	chr13:73319879-73320060	ENSMUSG00000021606.8	chr13	73319879	73320060	-	182	0.211408	2.19625
H2-Ke6	H2-K region expressed gene 6 [Source:MGI Symbol;Acc:MGI:95911]	chr17:34027623-34027840	ENSMUSG00000073422.11	chr17	34027623	34027840	-	218	0.211391	2.26971
Eif4enif1	eukaryotic translation initiation factor 4E nuclear import factor 1 [Source:MGI Symbol;Acc:MGI:1921453]	chr11:3234219-3234645	ENSMUSG00000020454.17	chr11	3234219	3234645	+	427	0.211304	2.67002
Uqcr11	ubiquinol-cytochrome c reductase, complex III subunit XI [Source:MGI Symbol;Acc:MGI:1913844]	chr10:80406500-80406795	ENSMUSG00000020163.12	chr10	80406500	80406795	-	296	0.211256	0.758238
Slc25a11	solute carrier family 25 (mitochondrial carrier oxoglutarate carrier), member 11 [Source:MGI Symbol;Acc:MGI:1915113]	chr11:70646768-70646899	ENSMUSG00000014606.14	chr11	70646768	70646899	-	132	0.211032	1.86685
Paics	phosphoribosylaminoimidazole carboxylase, phosphoribosylaminoribosylaminoimidazole, succinocarboxamide synthetase [Source:MGI Symbol;Acc:MGI:1914304]	chr5:76951307-76951835	ENSMUSG00000029247.17	chr5	76951307	76951835	+	529	0.21076	1.0847
Tmsb4x	thymosin, beta 4, X chromosome [Source:MGI Symbol;Acc:MGI:99510]	chrX:167209106-167209315	ENSMUSG00000049775.16	chrX	167209106	167209315	-	210	0.210587	0.294349
Etv4	ets variant 4 [Source:MGI Symbol;Acc:MGI:99423]	chr11:101785108-101785310	ENSMUSG00000017724.14	chr11	101785108	101785310	-	203	0.210444	1.06434
Tubd1	tubulin, delta 1 [Source:MGI Symbol;Acc:MGI:1891826]	chr11:86552788-86553004	ENSMUSG00000020513.15	chr11	86552788	86553004	+	217	0.210419	2.65269
Etfrf1	electron transfer flavoprotein regulatory factor 1 [Source:MGI Symbol;Acc:MGI:1914886]	chr6:145214765-145215271	ENSMUSG00000040370.13	chr6	145214765	145215271	+	507	0.210273	2.94718
Dhrs7b	dehydrogenase/reductase (SDR family) member 7B [Source:MGI Symbol;Acc:MGI:2384931]	chr11:60851742-60851958	ENSMUSG00000042569.13	chr11	60851742	60851958	+	217	0.210193	2.37254
Akap1	A kinase (PRKA) anchor protein 1 [Source:MGI Symbol;Acc:MGI:104729]	chr11:88835080-88835230	ENSMUSG00000018428.15	chr11	88835080	88835230	-	151	0.20959	2.01195
Slc25a25	solute carrier family 25 (mitochondrial carrier, phosphate carrier), member 25 [Source:MGI Symbol;Acc:MGI:1915913]	chr2:32419048-32419206	ENSMUSG00000026819.15	chr2	32419048	32419206	-	159	0.209275	2.64179
Khsrp	KH-type splicing regulatory protein [Source:MGI Symbol;Acc:MGI:1336214]	chr17:57023827-57023936	ENSMUSG00000007670.10	chr17	57023827	57023936	-	110	0.209023	2.15693
Vti1b	vesicle transport through interaction with t-SNAREs 1B [Source:MGI Symbol;Acc:MGI:1855688]	chr12:79172220-79172667	ENSMUSG00000021124.13	chr12	79172220	79172667	-	448	0.20899	2.74612
Jakmip2	janus kinase and microtubule interacting protein 2 [Source:MGI Symbol;Acc:MGI:1923467]	chr18:43569625-43571194	ENSMUSG00000024502.10	chr18	43569625	43571194	-	1570	0.208874	2.74811
Rragd	Ras-related GTP binding D [Source:MGI Symbol;Acc:MGI:1098604]	chr4:32983155-32983607	ENSMUSG00000028278.14	chr4	32983155	32983607	+	453	0.208849	1.74204
Etv4	ets variant 4 [Source:MGI Symbol;Acc:MGI:99423]	chr11:101785108-101785371	ENSMUSG00000017724.14	chr11	101785108	101785371	-	264	0.2088	1.06091
Sarm1	sterile alpha and HEAT/Armadillo motif containing 1 [Source:MGI Symbol;Acc:MGI:2136419]	chr11:78497216-78497686	ENSMUSG00000050132.13	chr11	78497216	78497686	-	471	0.208176	1.20857
H3f3b	H3.3 histone B [Source:MGI Symbol;Acc:MGI:1101768]	chr11:116023625-116024019	ENSMUSG00000016559.14	chr11	116023625	116024019	-	395	0.20807	2.15995
Canx	calnexin [Source:MGI Symbol;Acc:MGI:88261]	chr11:50325493-50325673	ENSMUSG00000020368.15	chr11	50325493	50325673	-	181	0.207665	0.756889
Camkk1	calcium/calmodulin-dependent protein kinase kinase 1, alpha [Source:MGI Symbol;Acc:MGI:1891766]	chr11:73037849-73037977	ENSMUSG00000020785.17	chr11	73037849	73037977	+	129	0.207312	2.13159
Lyn	LYN proto-oncogene, Src family tyrosine kinase [Source:MGI Symbol;Acc:MGI:96892]	chr4:3789742-3791613	ENSMUSG00000042228.14	chr4	3789742	3791613	+	1872	0.207235	2.77083
Lyn	LYN proto-oncogene, Src family tyrosine kinase [Source:MGI Symbol;Acc:MGI:96892]	chr4:3789742-3791612	ENSMUSG00000042228.14	chr4	3789742	3791612	+	1871	0.207235	2.77083
Kif21a	kinesin family member 21A [Source:MGI Symbol;Acc:MGI:109188]	chr15:90970679-90970878	ENSMUSG00000022629.17	chr15	90970679	90970878	-	200	0.206898	2.33366
Agpat1	1-acylglycerol-3-phosphate O-acyltransferase 1 (lysophosphatidic acid acyltransferase, alpha) [Source:MGI Symbol;Acc:MGI:1932075]	chr17:34611791-34611866	ENSMUSG00000034254.17	chr17	34611791	34611866	+	76	0.206683	2.13366
Septin8	septin 8 [Source:MGI Symbol;Acc:MGI:894310]	chr11:53537487-53537619	ENSMUSG00000018398.18	chr11	53537487	53537619	+	133	0.206425	1.58466
E2f4	E2F transcription factor 4 [Source:MGI Symbol;Acc:MGI:103012]	chr8:105304185-105304232	ENSMUSG00000014859.9	chr8	105304185	105304232	+	48	0.206233	2.50915
Mif	macrophage migration inhibitory factor (glycosylation-inhibiting factor) [Source:MGI Symbol;Acc:MGI:96982]	chr10:75859687-75859859	ENSMUSG00000033307.7	chr10	75859687	75859859	-	173	0.206216	3.13181
Grtp1	GH regulated TBC protein 1 [Source:MGI Symbol;Acc:MGI:1914040]	chr8:13179583-13179755	ENSMUSG00000038515.10	chr8	13179583	13179755	-	173	0.206041	1.23111
Grtp1	GH regulated TBC protein 1 [Source:MGI Symbol;Acc:MGI:1914040]	chr8:13179583-13179759	ENSMUSG00000038515.10	chr8	13179583	13179759	-	177	0.206041	1.23111
Rpl7	ribosomal protein L7 [Source:MGI Symbol;Acc:MGI:98073]	chr1:16101306-16101936	ENSMUSG00000043716.13	chr1	16101306	16101936	-	631	0.205424	2.15217
Utrn	utrophin [Source:MGI Symbol;Acc:MGI:104631]	chr10:12383380-12384196	ENSMUSG00000019820.11	chr10	12383380	12384196	-	817	0.204255	2.84258
Hdhd2	haloacid dehalogenase-like hydrolase domain containing 2 [Source:MGI Symbol;Acc:MGI:1924237]	chr18:76965051-76965267	ENSMUSG00000025421.15	chr18	76965051	76965267	+	217	0.204202	2.66404
Uqcrc2	ubiquinol cytochrome c reductase core protein 2 [Source:MGI Symbol;Acc:MGI:1914253]	chr7:120635240-120635322	ENSMUSG00000030884.12	chr7	120635240	120635322	+	83	0.204013	1.43577
Uqcrc2	ubiquinol cytochrome c reductase core protein 2 [Source:MGI Symbol;Acc:MGI:1914253]	chr7:120635263-120635322	ENSMUSG00000030884.12	chr7	120635263	120635322	+	60	0.204013	1.43577
Ppp1r13b	protein phosphatase 1, regulatory subunit 13B [Source:MGI Symbol;Acc:MGI:1336199]	chr12:111835613-111835776	ENSMUSG00000021285.15	chr12	111835613	111835776	-	164	0.204009	2.27929
Ccdc136	coiled-coil domain containing 136 [Source:MGI Symbol;Acc:MGI:1918128]	chr6:29419102-29419383	ENSMUSG00000029769.16	chr6	29419102	29419383	+	282	0.203885	1.2106
Eif2a	eukaryotic translation initiation factor 2A [Source:MGI Symbol;Acc:MGI:1098684]	chr3:58548393-58550726	ENSMUSG00000027810.14	chr3	58548393	58550726	+	2334	0.203684	1.66181
Nfatc3	nuclear factor of activated T cells, cytoplasmic, calcineurin dependent 3 [Source:MGI Symbol;Acc:MGI:103296]	chr8:106098765-106101485	ENSMUSG00000031902.10	chr8	106098765	106101485	+	2721	0.203533	1.01203
Rars	arginyl-tRNA synthetase [Source:MGI Symbol;Acc:MGI:1914297]	chr11:35819874-35820109	ENSMUSG00000018848.4	chr11	35819874	35820109	-	236	0.203059	1.59401
Specc1l	sperm antigen with calponin homology and coiled-coil domains 1-like [Source:MGI Symbol;Acc:MGI:1921642]	chr10:75261794-75261957	ENSMUSG00000033444.14	chr10	75261794	75261957	+	164	0.202899	2.47153
Abcb10	ATP-binding cassette, sub-family B (MDR/TAP), member 10 [Source:MGI Symbol;Acc:MGI:1860508]	chr8:123969720-123969922	ENSMUSG00000031974.8	chr8	123969720	123969922	-	203	0.20268	2.73545
H2-Ke6	H2-K region expressed gene 6 [Source:MGI Symbol;Acc:MGI:95911]	chr17:34027623-34027863	ENSMUSG00000073422.11	chr17	34027623	34027863	-	241	0.202571	2.22295
Rasgef1c	RasGEF domain family, member 1C [Source:MGI Symbol;Acc:MGI:1921813]	chr11:49967337-49967426	ENSMUSG00000020374.16	chr11	49967337	49967426	+	90	0.202381	2.37153
Chst10	carbohydrate sulfotransferase 10 [Source:MGI Symbol;Acc:MGI:2138283]	chr1:38890633-38894671	ENSMUSG00000026080.13	chr1	38890633	38894671	-	4039	0.202116	0.263514
Tmem216	transmembrane protein 216 [Source:MGI Symbol;Acc:MGI:1920020]	chr19:10553889-10555736	ENSMUSG00000024667.12	chr19	10553889	10555736	-	1848	0.201852	1.22037
Pcmtd1	protein-L-isoaspartate (D-aspartate) O-methyltransferase domain containing 1 [Source:MGI Symbol;Acc:MGI:2441773]	chr1:7163248-7163371	ENSMUSG00000051285.17	chr1	7163248	7163371	+	124	0.201602	2.6216
Atad3a	ATPase family, AAA domain containing 3A [Source:MGI Symbol;Acc:MGI:1919214]	chr4:155747202-155747481	ENSMUSG00000029036.18	chr4	155747202	155747481	-	280	0.201371	1.8875
Ttc14	tetratricopeptide repeat domain 14 [Source:MGI Symbol;Acc:MGI:1914370]	chr3:33802540-33802943	ENSMUSG00000027677.17	chr3	33802540	33802943	+	404	0.201227	1.80806
Tbcd	tubulin-specific chaperone d [Source:MGI Symbol;Acc:MGI:1919686]	chr11:121598316-121602040	ENSMUSG00000039230.14	chr11	121598316	121602040	+	3725	0.201082	0.760156
Fads3	fatty acid desaturase 3 [Source:MGI Symbol;Acc:MGI:1928740]	chr19:10041732-10041956	ENSMUSG00000024664.5	chr19	10041732	10041956	+	225	0.200985	1.81255
Tmsb4x	thymosin, beta 4, X chromosome [Source:MGI Symbol;Acc:MGI:99510]	chrX:167208323-167208827	ENSMUSG00000049775.16	chrX	167208323	167208827	-	505	0.200976	0.203503
Tax1bp1	Tax1 (human T cell leukemia virus type I) binding protein 1 [Source:MGI Symbol;Acc:MGI:1289308]	chr6:52758213-52762207	ENSMUSG00000004535.12	chr6	52758213	52762207	+	3995	0.200955	1.35587
Grwd1	glutamate-rich WD repeat containing 1 [Source:MGI Symbol;Acc:MGI:2141989]	chr7:45829982-45830144	ENSMUSG00000053801.18	chr7	45829982	45830144	-	163	0.200921	1.9782
Ptpn23	protein tyrosine phosphatase, non-receptor type 23 [Source:MGI Symbol;Acc:MGI:2144837]	chr9:110386454-110386638	ENSMUSG00000036057.11	chr9	110386454	110386638	-	185	0.200618	1.7476
Eif4enif1	eukaryotic translation initiation factor 4E nuclear import factor 1 [Source:MGI Symbol;Acc:MGI:1921453]	chr11:3234462-3234645	ENSMUSG00000020454.17	chr11	3234462	3234645	+	184	0.200592	3.92645
Map1lc3a	microtubule-associated protein 1 light chain 3 alpha [Source:MGI Symbol;Acc:MGI:1915661]	chr2:155276297-155276646	ENSMUSG00000027602.9	chr2	155276297	155276646	+	350	0.200576	0.994958
Mgll	monoglyceride lipase [Source:MGI Symbol;Acc:MGI:1346042]	chr6:88724596-88725178	ENSMUSG00000033174.17	chr6	88724596	88725178	+	583	0.200478	0.971316
Uqcrfs1	ubiquinol-cytochrome c reductase, Rieske iron-sulfur polypeptide 1 [Source:MGI Symbol;Acc:MGI:1913944]	chr13:30545034-30545362	ENSMUSG00000038462.3	chr13	30545034	30545362	-	329	0.200392	1.91867
Stk11ip	serine/threonine kinase 11 interacting protein [Source:MGI Symbol;Acc:MGI:1918978]	chr1:75529411-75529616	ENSMUSG00000026213.15	chr1	75529411	75529616	+	206	0.199945	2.33345
Ppcs	phosphopantothenoylcysteine synthetase [Source:MGI Symbol;Acc:MGI:1915237]	chr4:119421580-119422358	ENSMUSG00000028636.14	chr4	119421580	119422358	-	779	0.199568	2.1571
Arhgef33	Rho guanine nucleotide exchange factor (GEF) 33 [Source:MGI Symbol;Acc:MGI:2685787]	chr17:80372992-80373793	ENSMUSG00000054901.7	chr17	80372992	80373793	+	802	0.199565	2.30545
Sidt1	SID1 transmembrane family, member 1 [Source:MGI Symbol;Acc:MGI:2443155]	chr16:44243468-44243581	ENSMUSG00000022696.17	chr16	44243468	44243581	-	114	0.199132	3.32986
Wdr36	WD repeat domain 36 [Source:MGI Symbol;Acc:MGI:1917819]	chr18:32852864-32852972	ENSMUSG00000038299.16	chr18	32852864	32852972	+	109	0.19912	2.57058
Ipo5	importin 5 [Source:MGI Symbol;Acc:MGI:1917822]	chr14:120941632-120941743	ENSMUSG00000030662.10	chr14	120941632	120941743	+	112	0.198952	2.54815
Acadl	acyl-Coenzyme A dehydrogenase, long-chain [Source:MGI Symbol;Acc:MGI:87866]	chr1:66857399-66857554	ENSMUSG00000026003.5	chr1	66857399	66857554	-	156	0.198622	2.29731
Smyd4	SET and MYND domain containing 4 [Source:MGI Symbol;Acc:MGI:2442796]	chr11:75348495-75348751	ENSMUSG00000018809.2	chr11	75348495	75348751	+	257	0.198573	1.32064
Smyd4	SET and MYND domain containing 4 [Source:MGI Symbol;Acc:MGI:2442796]	chr11:75348433-75348751	ENSMUSG00000018809.2	chr11	75348433	75348751	+	319	0.198573	1.32064
Slc35a3	solute carrier family 35 (UDP-N-acetylglucosamine (UDP-GlcNAc) transporter), member 3 [Source:MGI Symbol;Acc:MGI:1917648]	chr3:116690386-116694634	ENSMUSG00000027957.13	chr3	116690386	116694634	-	4249	0.198366	1.51593
Sema4d	sema domain, immunoglobulin domain (Ig), transmembrane domain (TM) and short cytoplasmic domain, (semaphorin) 4D [Source:MGI Symbol;Acc:MGI:109244]	chr13:51712679-51712830	ENSMUSG00000021451.16	chr13	51712679	51712830	-	152	0.198299	1.54905
Wsb2	WD repeat and SOCS box-containing 2 [Source:MGI Symbol;Acc:MGI:2144041]	chr5:117363591-117366778	ENSMUSG00000029364.15	chr5	117363591	117366778	+	3188	0.198269	1.09638
Sorbs2	sorbin and SH3 domain containing 2 [Source:MGI Symbol;Acc:MGI:1924574]	chr8:45803632-45803746	ENSMUSG00000031626.18	chr8	45803632	45803746	+	115	0.19807	3.65365
Bach1	BTB and CNC homology 1, basic leucine zipper transcription factor 1 [Source:MGI Symbol;Acc:MGI:894680]	chr16:87722402-87722920	ENSMUSG00000025612.5	chr16	87722402	87722920	+	519	0.197714	2.95666
Synj1	synaptojanin 1 [Source:MGI Symbol;Acc:MGI:1354961]	chr16:90938803-90939034	ENSMUSG00000022973.18	chr16	90938803	90939034	-	232	0.197541	2.01513
Vti1b	vesicle transport through interaction with t-SNAREs 1B [Source:MGI Symbol;Acc:MGI:1855688]	chr12:79172220-79172448	ENSMUSG00000021124.13	chr12	79172220	79172448	-	229	0.197165	2.80288
Smpdl3a	sphingomyelin phosphodiesterase, acid-like 3A [Source:MGI Symbol;Acc:MGI:1931437]	chr10:57794568-57794849	ENSMUSG00000019872.13	chr10	57794568	57794849	+	282	0.197049	2.97807
Abca1	ATP-binding cassette, sub-family A (ABC1), member 1 [Source:MGI Symbol;Acc:MGI:99607]	chr4:53038157-53038291	ENSMUSG00000015243.4	chr4	53038157	53038291	-	135	0.196845	1.79175
Sorbs2	sorbin and SH3 domain containing 2 [Source:MGI Symbol;Acc:MGI:1924574]	chr8:45803208-45803746	ENSMUSG00000031626.18	chr8	45803208	45803746	+	539	0.196788	2.91777
Ube2n	ubiquitin-conjugating enzyme E2N [Source:MGI Symbol;Acc:MGI:1934835]	chr10:95515185-95515237	ENSMUSG00000074781.5	chr10	95515185	95515237	+	53	0.196542	1.06317
Btbd3	BTB (POZ) domain containing 3 [Source:MGI Symbol;Acc:MGI:2385155]	chr2:138280373-138280491	ENSMUSG00000062098.11	chr2	138280373	138280491	+	119	0.196301	2.55045
Rpl5	ribosomal protein L5 [Source:MGI Symbol;Acc:MGI:102854]	chr5:107907897-107909005	ENSMUSG00000058558.12	chr5	107907897	107909005	+	1109	0.195881	1.85132
Mrpl9	mitochondrial ribosomal protein L9 [Source:MGI Symbol;Acc:MGI:2137211]	chr3:94443337-94443494	ENSMUSG00000028140.13	chr3	94443337	94443494	+	158	0.195666	1.84962
Nrbp2	nuclear receptor binding protein 2 [Source:MGI Symbol;Acc:MGI:2385017]	chr15:76089455-76089532	ENSMUSG00000075590.4	chr15	76089455	76089532	-	78	0.195531	3.0354
Cdk16	cyclin-dependent kinase 16 [Source:MGI Symbol;Acc:MGI:97516]	chrX:20698451-20698528	ENSMUSG00000031065.14	chrX	20698451	20698528	+	78	0.195475	2.29344
Pcnp	PEST proteolytic signal containing nuclear protein [Source:MGI Symbol;Acc:MGI:1923552]	chr16:56018120-56018527	ENSMUSG00000071533.11	chr16	56018120	56018527	-	408	0.194674	1.12118
Tmbim6	transmembrane BAX inhibitor motif containing 6 [Source:MGI Symbol;Acc:MGI:99682]	chr15:99399657-99399871	ENSMUSG00000023010.15	chr15	99399657	99399871	+	215	0.19464	0.550582
Kdelr1	KDEL (Lys-Asp-Glu-Leu) endoplasmic reticulum protein retention receptor 1 [Source:MGI Symbol;Acc:MGI:1915387]	chr7:45882977-45883247	ENSMUSG00000002778.14	chr7	45882977	45883247	+	271	0.19421	2.69285
Polr2i	polymerase (RNA) II (DNA directed) polypeptide I [Source:MGI Symbol;Acc:MGI:1917170]	chr7:30232332-30232536	ENSMUSG00000019738.15	chr7	30232332	30232536	+	205	0.194147	2.20747
Iscu	iron-sulfur cluster assembly enzyme [Source:MGI Symbol;Acc:MGI:1913633]	chr5:113776771-113776849	ENSMUSG00000025825.12	chr5	113776771	113776849	+	79	0.194091	2.49776
Chrd	chordin [Source:MGI Symbol;Acc:MGI:1313268]	chr16:20733434-20733634	ENSMUSG00000006958.14	chr16	20733434	20733634	+	201	0.193905	1.77542
Pphln1	periphilin 1 [Source:MGI Symbol;Acc:MGI:1917029]	chr15:93465105-93465245	ENSMUSG00000036167.16	chr15	93465105	93465245	+	141	0.193665	2.07225
Egf	epidermal growth factor [Source:MGI Symbol;Acc:MGI:95290]	chr3:129678337-129678555	ENSMUSG00000028017.7	chr3	129678337	129678555	-	219	0.193532	2.97343
Dtymk	deoxythymidylate kinase [Source:MGI Symbol;Acc:MGI:108396]	chr1:93794726-93794923	ENSMUSG00000026281.15	chr1	93794726	93794923	-	198	0.193478	2.06254
Nrbp2	nuclear receptor binding protein 2 [Source:MGI Symbol;Acc:MGI:2385017]	chr15:76089437-76089532	ENSMUSG00000075590.4	chr15	76089437	76089532	-	96	0.193408	2.76655
Tmem43	transmembrane protein 43 [Source:MGI Symbol;Acc:MGI:1921372]	chr6:91485317-91485434	ENSMUSG00000030095.10	chr6	91485317	91485434	+	118	0.193255	1.82834
Smarcd2	SWI/SNF related, matrix associated, actin dependent regulator of chromatin, subfamily d, member 2 [Source:MGI Symbol;Acc:MGI:1933621]	chr11:106272493-106272972	ENSMUSG00000078619.10	chr11	106272493	106272972	-	480	0.193238	1.62756
Map2k1	mitogen-activated protein kinase kinase 1 [Source:MGI Symbol;Acc:MGI:1346866]	chr9:64191267-64191331	ENSMUSG00000004936.8	chr9	64191267	64191331	-	65	0.192995	2.52084
Smpdl3a	sphingomyelin phosphodiesterase, acid-like 3A [Source:MGI Symbol;Acc:MGI:1931437]	chr10:57794374-57794784	ENSMUSG00000019872.13	chr10	57794374	57794784	+	411	0.191986	2.52255
Dbi	diazepam binding inhibitor [Source:MGI Symbol;Acc:MGI:94865]	chr1:120116386-120116448	ENSMUSG00000026385.16	chr1	120116386	120116448	-	63	0.191539	2.49159
Hmg20a	high mobility group 20A [Source:MGI Symbol;Acc:MGI:1914117]	chr9:56467358-56467450	ENSMUSG00000032329.4	chr9	56467358	56467450	+	93	0.1913	2.29011
Nckap1	NCK-associated protein 1 [Source:MGI Symbol;Acc:MGI:1355333]	chr2:80580858-80581380	ENSMUSG00000027002.13	chr2	80580858	80581380	-	523	0.191288	1.19814
Shank3	SH3 and multiple ankyrin repeat domains 3 [Source:MGI Symbol;Acc:MGI:1930016]	chr15:89501283-89501475	ENSMUSG00000022623.17	chr15	89501283	89501475	+	193	0.191274	1.3914
Rit2	Ras-like without CAAX 2 [Source:MGI Symbol;Acc:MGI:108054]	chr18:31153271-31153896	ENSMUSG00000057455.12	chr18	31153271	31153896	-	626	0.191258	2.06477
Kcnc3	potassium voltage gated channel, Shaw-related subfamily, member 3 [Source:MGI Symbol;Acc:MGI:96669]	chr7:44596093-44596268	ENSMUSG00000062785.14	chr7	44596093	44596268	+	176	0.191082	2.46723
Soga3	SOGA family member 3 [Source:MGI Symbol;Acc:MGI:1914662]	chr10:29147721-29147753	ENSMUSG00000038916.7	chr10	29147721	29147753	+	33	0.19092	2.84784
Mdm2	transformed mouse 3T3 cell double minute 2 [Source:MGI Symbol;Acc:MGI:96952]	chr10:117710552-117710758	ENSMUSG00000020184.15	chr10	117710552	117710758	-	207	0.190378	0.507074
Snrpc	U1 small nuclear ribonucleoprotein C [Source:MGI Symbol;Acc:MGI:109489]	chr17:27840464-27842378	ENSMUSG00000024217.10	chr17	27840464	27842378	+	1915	0.190158	2.26434
Slc25a39	solute carrier family 25, member 39 [Source:MGI Symbol;Acc:MGI:1196386]	chr11:102403791-102403872	ENSMUSG00000018677.9	chr11	102403791	102403872	-	82	0.189872	2.56238
Izumo4	IZUMO family member 4 [Source:MGI Symbol;Acc:MGI:1918814]	chr10:80703049-80703213	ENSMUSG00000055862.7	chr10	80703049	80703213	+	165	0.189654	2.35966
Pcif1	phosphorylated CTD interacting factor 1 [Source:MGI Symbol;Acc:MGI:2443858]	chr2:164889554-164889738	ENSMUSG00000039849.6	chr2	164889554	164889738	+	185	0.189507	2.72111
Snrnp200	small nuclear ribonucleoprotein 200 (U5) [Source:MGI Symbol;Acc:MGI:2444401]	chr2:127235960-127236068	ENSMUSG00000003660.10	chr2	127235960	127236068	+	109	0.18948	2.0778
Bach1	BTB and CNC homology 1, basic leucine zipper transcription factor 1 [Source:MGI Symbol;Acc:MGI:894680]	chr16:87722402-87722608	ENSMUSG00000025612.5	chr16	87722402	87722608	+	207	0.1891	2.91804
Map7d1	MAP7 domain containing 1 [Source:MGI Symbol;Acc:MGI:2384297]	chr4:126240023-126240111	ENSMUSG00000028849.17	chr4	126240023	126240111	-	89	0.189052	1.78506
Map7d1	MAP7 domain containing 1 [Source:MGI Symbol;Acc:MGI:2384297]	chr4:126240023-126240137	ENSMUSG00000028849.17	chr4	126240023	126240137	-	115	0.189052	1.78506
Siae	sialic acid acetylesterase [Source:MGI Symbol;Acc:MGI:104803]	chr9:37613623-37618075	ENSMUSG00000001942.8	chr9	37613623	37618075	+	4453	0.188898	0.534746
Abhd1	abhydrolase domain containing 1 [Source:MGI Symbol;Acc:MGI:1931013]	chr5:30953879-30953991	ENSMUSG00000006638.15	chr5	30953879	30953991	+	113	0.188849	1.70356
Ltbp3	latent transforming growth factor beta binding protein 3 [Source:MGI Symbol;Acc:MGI:1101355]	chr19:5755546-5755674	ENSMUSG00000024940.11	chr19	5755546	5755674	+	129	0.188664	2.42021
H2-Ke6	H2-K region expressed gene 6 [Source:MGI Symbol;Acc:MGI:95911]	chr17:34027016-34027101	ENSMUSG00000073422.11	chr17	34027016	34027101	-	86	0.188503	2.51479
L1cam	L1 cell adhesion molecule [Source:MGI Symbol;Acc:MGI:96721]	chrX:73856903-73857022	ENSMUSG00000031391.18	chrX	73856903	73857022	-	120	0.188466	3.00625
Eno1	enolase 1, alpha non-neuron [Source:MGI Symbol;Acc:MGI:95393]	chr4:150247565-150247939	ENSMUSG00000063524.13	chr4	150247565	150247939	+	375	0.188347	2.42524
Zfp787	zinc finger protein 787 [Source:MGI Symbol;Acc:MGI:1914359]	chr7:6140001-6142845	ENSMUSG00000046792.8	chr7	6140001	6142845	-	2845	0.188305	0.699075
Dpf2	D4, zinc and double PHD fingers family 2 [Source:MGI Symbol;Acc:MGI:109529]	chr19:5903731-5903772	ENSMUSG00000024826.15	chr19	5903731	5903772	-	42	0.187991	2.16412
Cdr2l	cerebellar degeneration-related protein 2-like [Source:MGI Symbol;Acc:MGI:2684867]	chr11:115381916-115382401	ENSMUSG00000050910.5	chr11	115381916	115382401	+	486	0.187809	1.79866
Tmem131	transmembrane protein 131 [Source:MGI Symbol;Acc:MGI:1927110]	chr1:36808539-36808985	ENSMUSG00000026116.11	chr1	36808539	36808985	-	447	0.187746	2.64569
Ap5z1	adaptor-related protein complex 5, zeta 1 subunit [Source:MGI Symbol;Acc:MGI:1924908]	chr5:142470394-142472384	ENSMUSG00000039623.13	chr5	142470394	142472384	+	1991	0.187478	2.84019
Map7d1	MAP7 domain containing 1 [Source:MGI Symbol;Acc:MGI:2384297]	chr4:126240032-126240137	ENSMUSG00000028849.17	chr4	126240032	126240137	-	106	0.187077	1.77616
Sart1	squamous cell carcinoma antigen recognized by T cells 1 [Source:MGI Symbol;Acc:MGI:1309453]	chr19:5388315-5388703	ENSMUSG00000039148.5	chr19	5388315	5388703	-	389	0.187065	1.81467
Nabp1	nucleic acid binding protein 1 [Source:MGI Symbol;Acc:MGI:1923258]	chr1:51475592-51478399	ENSMUSG00000026107.11	chr1	51475592	51478399	-	2808	0.186998	1.38708
Mlf2	myeloid leukemia factor 2 [Source:MGI Symbol;Acc:MGI:1353554]	chr6:124934291-124934419	ENSMUSG00000030120.14	chr6	124934291	124934419	+	129	0.186742	1.46957
Zfp606	zinc finger protein 606 [Source:MGI Symbol;Acc:MGI:1914620]	chr7:12480935-12483901	ENSMUSG00000030386.19	chr7	12480935	12483901	+	2967	0.18643	1.59228
Gabarapl1	gamma-aminobutyric acid (GABA) A receptor-associated protein-like 1 [Source:MGI Symbol;Acc:MGI:1914980]	chr6:129537491-129537569	ENSMUSG00000030161.8	chr6	129537491	129537569	+	79	0.186374	1.57739
Dgkz	diacylglycerol kinase zeta [Source:MGI Symbol;Acc:MGI:1278339]	chr2:91937438-91937637	ENSMUSG00000040479.12	chr2	91937438	91937637	-	200	0.186315	2.37268
Cacna1e	calcium channel, voltage-dependent, R type, alpha 1E subunit [Source:MGI Symbol;Acc:MGI:106217]	chr1:154471338-154471651	ENSMUSG00000004110.17	chr1	154471338	154471651	-	314	0.186294	2.3025
Cacna1e	calcium channel, voltage-dependent, R type, alpha 1E subunit [Source:MGI Symbol;Acc:MGI:106217]	chr1:154471345-154471651	ENSMUSG00000004110.17	chr1	154471345	154471651	-	307	0.186294	2.3025
Mcrs1	microspherule protein 1 [Source:MGI Symbol;Acc:MGI:1858420]	chr15:99243680-99243767	ENSMUSG00000037570.16	chr15	99243680	99243767	-	88	0.18621	3.3441
Stam	signal transducing adaptor molecule (SH3 domain and ITAM motif) 1 [Source:MGI Symbol;Acc:MGI:1329014]	chr2:14134122-14134441	ENSMUSG00000026718.17	chr2	14134122	14134441	+	320	0.186198	2.64423
Mrps35	mitochondrial ribosomal protein S35 [Source:MGI Symbol;Acc:MGI:2385255]	chr6:147042764-147042900	ENSMUSG00000040112.9	chr6	147042764	147042900	+	137	0.18592	2.3188
Acot8	acyl-CoA thioesterase 8 [Source:MGI Symbol;Acc:MGI:2158201]	chr2:164792765-164793010	ENSMUSG00000017307.16	chr2	164792765	164793010	-	246	0.185214	2.14671
Nabp2	nucleic acid binding protein 2 [Source:MGI Symbol;Acc:MGI:1917167]	chr10:128409247-128409348	ENSMUSG00000025374.13	chr10	128409247	128409348	-	102	0.185033	2.58957
Prdx2	peroxiredoxin 2 [Source:MGI Symbol;Acc:MGI:109486]	chr8:84969857-84970344	ENSMUSG00000005161.15	chr8	84969857	84970344	+	488	0.184955	1.58998
Frzb	frizzled-related protein [Source:MGI Symbol;Acc:MGI:892032]	chr2:80446363-80447625	ENSMUSG00000027004.3	chr2	80446363	80447625	-	1263	0.184932	1.75877
Madd	MAP-kinase activating death domain [Source:MGI Symbol;Acc:MGI:2444672]	chr2:91152147-91152564	ENSMUSG00000040687.16	chr2	91152147	91152564	-	418	0.184612	1.66696
Abcb6	ATP-binding cassette, sub-family B (MDR/TAP), member 6 [Source:MGI Symbol;Acc:MGI:1921354]	chr1:75172555-75173919	ENSMUSG00000026198.15	chr1	75172555	75173919	-	1365	0.184464	1.96366
Pgbd5	piggyBac transposable element derived 5 [Source:MGI Symbol;Acc:MGI:2429955]	chr8:124380184-124380318	ENSMUSG00000050751.14	chr8	124380184	124380318	-	135	0.184194	2.35216
Cic	capicua transcriptional repressor [Source:MGI Symbol;Acc:MGI:1918972]	chr7:25282179-25282916	ENSMUSG00000005442.13	chr7	25282179	25282916	+	738	0.184177	0.632241
Ranbp1	RAN binding protein 1 [Source:MGI Symbol;Acc:MGI:96269]	chr16:18239802-18240193	ENSMUSG00000005732.14	chr16	18239802	18240193	-	392	0.183752	1.85291
Cap2	CAP, adenylate cyclase-associated protein, 2 (yeast) [Source:MGI Symbol;Acc:MGI:1914502]	chr13:46646526-46646572	ENSMUSG00000021373.16	chr13	46646526	46646572	+	47	0.182993	2.8947
Tmem131	transmembrane protein 131 [Source:MGI Symbol;Acc:MGI:1927110]	chr1:36808827-36808985	ENSMUSG00000026116.11	chr1	36808827	36808985	-	159	0.182934	2.37185
Cst3	cystatin C [Source:MGI Symbol;Acc:MGI:102519]	chr2:148872848-148872930	ENSMUSG00000027447.6	chr2	148872848	148872930	-	83	0.182789	4.15716
Cst3	cystatin C [Source:MGI Symbol;Acc:MGI:102519]	chr2:148872817-148872930	ENSMUSG00000027447.6	chr2	148872817	148872930	-	114	0.182788	4.20724
Ranbp1	RAN binding protein 1 [Source:MGI Symbol;Acc:MGI:96269]	chr16:18239784-18240193	ENSMUSG00000005732.14	chr16	18239784	18240193	-	410	0.182654	1.87732
Btg1	BTG anti-proliferation factor 1 [Source:MGI Symbol;Acc:MGI:88215]	chr10:96617006-96617472	ENSMUSG00000036478.8	chr10	96617006	96617472	+	467	0.182616	2.75449
Hsd17b10	hydroxysteroid (17-beta) dehydrogenase 10 [Source:MGI Symbol;Acc:MGI:1333871]	chrX:152003862-152003970	ENSMUSG00000025260.10	chrX	152003862	152003970	+	109	0.182263	2.08738
Cst3	cystatin C [Source:MGI Symbol;Acc:MGI:102519]	chr2:148872472-148872930	ENSMUSG00000027447.6	chr2	148872472	148872930	-	459	0.181915	3.28168
Dbi	diazepam binding inhibitor [Source:MGI Symbol;Acc:MGI:94865]	chr1:120116010-120116448	ENSMUSG00000026385.16	chr1	120116010	120116448	-	439	0.181804	2.20105
Ubqln4	ubiquilin 4 [Source:MGI Symbol;Acc:MGI:2150152]	chr3:88565691-88565877	ENSMUSG00000008604.11	chr3	88565691	88565877	+	187	0.181708	2.48045
Trex1	three prime repair exonuclease 1 [Source:MGI Symbol;Acc:MGI:1328317]	chr9:109059189-109059251	ENSMUSG00000049734.9	chr9	109059189	109059251	-	63	0.181641	1.50629
Uqcrc2	ubiquinol cytochrome c reductase core protein 2 [Source:MGI Symbol;Acc:MGI:1914253]	chr7:120635176-120635322	ENSMUSG00000030884.12	chr7	120635176	120635322	+	147	0.181626	2.14016
Mast2	microtubule associated serine/threonine kinase 2 [Source:MGI Symbol;Acc:MGI:894676]	chr4:116308008-116308334	ENSMUSG00000003810.13	chr4	116308008	116308334	-	327	0.18151	2.66875
Zfp639	zinc finger protein 639 [Source:MGI Symbol;Acc:MGI:1915028]	chr3:32510896-32511206	ENSMUSG00000027667.13	chr3	32510896	32511206	+	311	0.181393	1.66064
Pgam1	phosphoglycerate mutase 1 [Source:MGI Symbol;Acc:MGI:97552]	chr19:41911923-41912186	ENSMUSG00000011752.7	chr19	41911923	41912186	+	264	0.181185	1.47051
Pdxp	pyridoxal (pyridoxine, vitamin B6) phosphatase [Source:MGI Symbol;Acc:MGI:1919282]	chr15:78913919-78914531	ENSMUSG00000116165.1	chr15	78913919	78914531	+	613	0.180412	1.90798
Irf9	interferon regulatory factor 9 [Source:MGI Symbol;Acc:MGI:107587]	chr14:55607514-55607855	ENSMUSG00000002325.15	chr14	55607514	55607855	+	342	0.180377	2.65857
Ap1ar	adaptor-related protein complex 1 associated regulatory protein [Source:MGI Symbol;Acc:MGI:2384822]	chr3:127837149-127837231	ENSMUSG00000074238.6	chr3	127837149	127837231	-	83	0.180316	2.43074
Psenen	presenilin enhancer gamma secretase subunit [Source:MGI Symbol;Acc:MGI:1913590]	chr7:30562014-30562134	ENSMUSG00000036835.7	chr7	30562014	30562134	-	121	0.180285	2.45685
Adarb1	adenosine deaminase, RNA-specific, B1 [Source:MGI Symbol;Acc:MGI:891999]	chr10:77322791-77325691	ENSMUSG00000020262.15	chr10	77322791	77325691	-	2901	0.179958	0.900698
Anxa5	annexin A5 [Source:MGI Symbol;Acc:MGI:106008]	chr3:36475573-36475894	ENSMUSG00000027712.13	chr3	36475573	36475894	-	322	0.179805	0.807519
Ctnnb1	catenin (cadherin associated protein), beta 1 [Source:MGI Symbol;Acc:MGI:88276]	chr9:120957517-120957667	ENSMUSG00000006932.17	chr9	120957517	120957667	+	151	0.179676	2.02312
Ctnnb1	catenin (cadherin associated protein), beta 1 [Source:MGI Symbol;Acc:MGI:88276]	chr9:120957517-120957639	ENSMUSG00000006932.17	chr9	120957517	120957639	+	123	0.179403	2.02457
Copg2	coatomer protein complex, subunit gamma 2 [Source:MGI Symbol;Acc:MGI:1858683]	chr6:30858738-30858895	ENSMUSG00000025607.15	chr6	30858738	30858895	-	158	0.178958	1.41494
Rad50	RAD50 double strand break repair protein [Source:MGI Symbol;Acc:MGI:109292]	chr11:53674698-53674811	ENSMUSG00000020380.16	chr11	53674698	53674811	-	114	0.178705	2.52361
Ccdc142os	coiled-coil domain containing 142, opposite strand [Source:MGI Symbol;Acc:MGI:3783052]	chr6:83107743-83107806	ENSMUSG00000087578.1	chr6	83107743	83107806	-	64	0.17849	2.56549
Acsl1	acyl-CoA synthetase long-chain family member 1 [Source:MGI Symbol;Acc:MGI:102797]	chr8:46513573-46516631	ENSMUSG00000018796.13	chr8	46513573	46516631	+	3059	0.178312	1.36035
Irf9	interferon regulatory factor 9 [Source:MGI Symbol;Acc:MGI:107587]	chr14:55607275-55607855	ENSMUSG00000002325.15	chr14	55607275	55607855	+	581	0.17831	2.21942
Prkar1b	protein kinase, cAMP dependent regulatory, type I beta [Source:MGI Symbol;Acc:MGI:97759]	chr5:139129644-139129759	ENSMUSG00000025855.13	chr5	139129644	139129759	-	116	0.178268	0.860618
Ralbp1	ralA binding protein 1 [Source:MGI Symbol;Acc:MGI:108466]	chr17:65849420-65850195	ENSMUSG00000024096.17	chr17	65849420	65850195	-	776	0.178177	2.90108
Adap1	ArfGAP with dual PH domains 1 [Source:MGI Symbol;Acc:MGI:2442201]	chr5:139274447-139274641	ENSMUSG00000056413.16	chr5	139274447	139274641	-	195	0.178029	1.24411
Tomt	transmembrane O-methyltransferase [Source:MGI Symbol;Acc:MGI:3769724]	chr7:101899803-101900623	ENSMUSG00000078630.8	chr7	101899803	101900623	-	821	0.177526	1.67302
Atp5g1	ATP synthase, H+ transporting, mitochondrial F0 complex, subunit C1 (subunit 9) [Source:MGI Symbol;Acc:MGI:107653]	chr11:96068867-96073218	ENSMUSG00000006057.15	chr11	96068867	96073218	-	4352	0.177418	2.33815
Atp5g1	ATP synthase, H+ transporting, mitochondrial F0 complex, subunit C1 (subunit 9) [Source:MGI Symbol;Acc:MGI:107653]	chr11:96068852-96073218	ENSMUSG00000006057.15	chr11	96068852	96073218	-	4367	0.177418	2.33815
Tmcc3	transmembrane and coiled coil domains 3 [Source:MGI Symbol;Acc:MGI:2442900]	chr10:94586728-94588117	ENSMUSG00000020023.18	chr10	94586728	94588117	+	1390	0.177418	1.85116
Fam20c	FAM20C, golgi associated secretory pathway kinase [Source:MGI Symbol;Acc:MGI:2136853]	chr5:138806207-138806387	ENSMUSG00000025854.15	chr5	138806207	138806387	+	181	0.177383	2.03465
Zfp943	zinc finger prtoein 943 [Source:MGI Symbol;Acc:MGI:1921920]	chr17:21990779-21992044	ENSMUSG00000053347.15	chr17	21990779	21992044	+	1266	0.17724	1.9543
Calm2	calmodulin 2 [Source:MGI Symbol;Acc:MGI:103250]	chr17:87446793-87446935	ENSMUSG00000036438.14	chr17	87446793	87446935	-	143	0.176781	0.28369
Tacc3	transforming, acidic coiled-coil containing protein 3 [Source:MGI Symbol;Acc:MGI:1341163]	chr5:33667043-33667167	ENSMUSG00000037313.16	chr5	33667043	33667167	+	125	0.176554	1.99505
Uqcr11	ubiquinol-cytochrome c reductase, complex III subunit XI [Source:MGI Symbol;Acc:MGI:1913844]	chr10:80406557-80406766	ENSMUSG00000020163.12	chr10	80406557	80406766	-	210	0.176477	0.746513
Pitpna	phosphatidylinositol transfer protein, alpha [Source:MGI Symbol;Acc:MGI:99887]	chr11:75598180-75598548	ENSMUSG00000017781.17	chr11	75598180	75598548	+	369	0.176468	2.2338
Zfp512b	zinc finger protein 512B [Source:MGI Symbol;Acc:MGI:2685478]	chr2:181589079-181589287	ENSMUSG00000000823.16	chr2	181589079	181589287	-	209	0.176397	1.82062
Ucp2	uncoupling protein 2 (mitochondrial, proton carrier) [Source:MGI Symbol;Acc:MGI:109354]	chr7:100499236-100502020	ENSMUSG00000033685.13	chr7	100499236	100502020	+	2785	0.175953	2.40801
Slc25a1	solute carrier family 25 (mitochondrial carrier, citrate transporter), member 1 [Source:MGI Symbol;Acc:MGI:1345283]	chr16:17926656-17926740	ENSMUSG00000003528.15	chr16	17926656	17926740	-	85	0.175929	2.03283
Cyria	CYFIP related Rac1 interactor A [Source:MGI Symbol;Acc:MGI:1261783]	chr12:12340679-12343432	ENSMUSG00000020589.17	chr12	12340679	12343432	+	2754	0.175917	0.864898
Pals2	protein associated with LIN7 2, MAGUK family member [Source:MGI Symbol;Acc:MGI:1927340]	chr6:50163422-50163635	ENSMUSG00000038388.14	chr6	50163422	50163635	+	214	0.1758	2.24232
Pals2	protein associated with LIN7 2, MAGUK family member [Source:MGI Symbol;Acc:MGI:1927340]	chr6:50163422-50163649	ENSMUSG00000038388.14	chr6	50163422	50163649	+	228	0.1758	2.24232
Ogdh	oxoglutarate (alpha-ketoglutarate) dehydrogenase (lipoamide) [Source:MGI Symbol;Acc:MGI:1098267]	chr11:6349100-6349227	ENSMUSG00000020456.17	chr11	6349100	6349227	+	128	0.175694	1.28418
Nsun2	NOL1/NOP2/Sun domain family member 2 [Source:MGI Symbol;Acc:MGI:107252]	chr13:69630740-69631315	ENSMUSG00000021595.18	chr13	69630740	69631315	+	576	0.174949	1.54813
Prkcz	protein kinase C, zeta [Source:MGI Symbol;Acc:MGI:97602]	chr4:155294353-155294398	ENSMUSG00000029053.16	chr4	155294353	155294398	-	46	0.174909	2.86817
Blzf1	basic leucine zipper nuclear factor 1 [Source:MGI Symbol;Acc:MGI:1201607]	chr1:164299545-164299744	ENSMUSG00000026577.13	chr1	164299545	164299744	-	200	0.174681	2.23632
Blzf1	basic leucine zipper nuclear factor 1 [Source:MGI Symbol;Acc:MGI:1201607]	chr1:164299542-164299744	ENSMUSG00000026577.13	chr1	164299542	164299744	-	203	0.174681	2.23632
Brk1	BRICK1, SCAR/WAVE actin-nucleating complex subunit [Source:MGI Symbol;Acc:MGI:1915406]	chr6:113615776-113615858	ENSMUSG00000033940.8	chr6	113615776	113615858	+	83	0.173713	1.90389
Kri1	KRI1 homolog [Source:MGI Symbol;Acc:MGI:2384899]	chr9:21275269-21275367	ENSMUSG00000035047.9	chr9	21275269	21275367	-	99	0.17294	2.35049
Mrrf	mitochondrial ribosome recycling factor [Source:MGI Symbol;Acc:MGI:1915121]	chr2:36159599-36159690	ENSMUSG00000026887.9	chr2	36159599	36159690	+	92	0.172787	2.43427
Porcn	porcupine O-acyltransferase [Source:MGI Symbol;Acc:MGI:1890212]	chrX:8203369-8203550	ENSMUSG00000031169.13	chrX	8203369	8203550	-	182	0.172697	2.3911
Psmd13	proteasome (prosome, macropain) 26S subunit, non-ATPase, 13 [Source:MGI Symbol;Acc:MGI:1345192]	chr7:140890495-140890620	ENSMUSG00000025487.15	chr7	140890495	140890620	+	126	0.172681	2.36939
Shkbp1	Sh3kbp1 binding protein 1 [Source:MGI Symbol;Acc:MGI:2385803]	chr7:27354079-27354452	ENSMUSG00000089832.8	chr7	27354079	27354452	-	374	0.171997	1.32303
Atl3	atlastin GTPase 3 [Source:MGI Symbol;Acc:MGI:1924270]	chr19:7533950-7534200	ENSMUSG00000024759.14	chr19	7533950	7534200	+	251	0.171993	2.00134
Pitpna	phosphatidylinositol transfer protein, alpha [Source:MGI Symbol;Acc:MGI:99887]	chr11:75598180-75598328	ENSMUSG00000017781.17	chr11	75598180	75598328	+	149	0.171651	2.18609
Hsf1	heat shock factor 1 [Source:MGI Symbol;Acc:MGI:96238]	chr15:76499966-76500053	ENSMUSG00000022556.11	chr15	76499966	76500053	+	88	0.171604	2.66306
Stk10	serine/threonine kinase 10 [Source:MGI Symbol;Acc:MGI:1099439]	chr11:32555124-32555288	ENSMUSG00000020272.8	chr11	32555124	32555288	+	165	0.171478	1.54929
Taf11	TATA-box binding protein associated factor 11 [Source:MGI Symbol;Acc:MGI:1916026]	chr17:27902528-27903339	ENSMUSG00000024218.13	chr17	27902528	27903339	-	812	0.170946	1.66819
Ttc39c	tetratricopeptide repeat domain 39C [Source:MGI Symbol;Acc:MGI:1919997]	chr18:12684837-12684885	ENSMUSG00000024424.15	chr18	12684837	12684885	+	49	0.170732	2.53534
Adcy5	adenylate cyclase 5 [Source:MGI Symbol;Acc:MGI:99673]	chr16:35291502-35291677	ENSMUSG00000022840.9	chr16	35291502	35291677	+	176	0.170599	1.71735
Ecd	ecdysoneless cell cycle regulator [Source:MGI Symbol;Acc:MGI:1917851]	chr14:20334799-20336197	ENSMUSG00000021810.3	chr14	20334799	20336197	-	1399	0.170582	1.47555
Sgsm3	small G protein signaling modulator 3 [Source:MGI Symbol;Acc:MGI:1916329]	chr15:81004063-81004185	ENSMUSG00000042303.19	chr15	81004063	81004185	+	123	0.170429	0.625319
Ctnnb1	catenin (cadherin associated protein), beta 1 [Source:MGI Symbol;Acc:MGI:88276]	chr9:120955814-120956447	ENSMUSG00000006932.17	chr9	120955814	120956447	+	634	0.169544	1.80816
Ccdc136	coiled-coil domain containing 136 [Source:MGI Symbol;Acc:MGI:1918128]	chr6:29396643-29396742	ENSMUSG00000029769.16	chr6	29396643	29396742	+	100	0.169174	1.40686
Washc2	WASH complex subunit 2 [Source:MGI Symbol;Acc:MGI:106463]	chr6:116208137-116208327	ENSMUSG00000024104.11	chr6	116208137	116208327	+	191	0.168822	1.17534
Ahsa2	AHA1, activator of heat shock protein ATPase 2 [Source:MGI Symbol;Acc:MGI:1916133]	chr11:23491475-23491582	ENSMUSG00000020288.13	chr11	23491475	23491582	-	108	0.168433	2.67254
Ncoa2	nuclear receptor coactivator 2 [Source:MGI Symbol;Acc:MGI:1276533]	chr1:13148317-13148507	ENSMUSG00000005886.14	chr1	13148317	13148507	-	191	0.168305	2.32209
Ncoa2	nuclear receptor coactivator 2 [Source:MGI Symbol;Acc:MGI:1276533]	chr1:13148317-13148515	ENSMUSG00000005886.14	chr1	13148317	13148515	-	199	0.168305	2.32209
Wdr27	WD repeat domain 27 [Source:MGI Symbol;Acc:MGI:1918932]	chr17:14937843-14939580	ENSMUSG00000046991.12	chr17	14937843	14939580	-	1738	0.166953	2.50183
Calm3	calmodulin 3 [Source:MGI Symbol;Acc:MGI:103249]	chr7:16923841-16924114	ENSMUSG00000019370.10	chr7	16923841	16924114	-	274	0.166939	0.847173
Lnx1	ligand of numb-protein X 1 [Source:MGI Symbol;Acc:MGI:1278335]	chr5:74628120-74628361	ENSMUSG00000029228.15	chr5	74628120	74628361	-	242	0.166626	2.82404
Atp5c1	ATP synthase, H+ transporting, mitochondrial F1 complex, gamma polypeptide 1 [Source:MGI Symbol;Acc:MGI:1261437]	chr2:10059501-10059656	ENSMUSG00000025781.14	chr2	10059501	10059656	-	156	0.166363	2.35838
Higd1a	HIG1 domain family, member 1A [Source:MGI Symbol;Acc:MGI:1930666]	chr9:121857512-121858362	ENSMUSG00000038412.8	chr9	121857512	121858362	-	851	0.16628	2.13195
Dhx32	DEAH (Asp-Glu-Ala-His) box polypeptide 32 [Source:MGI Symbol;Acc:MGI:2141813]	chr7:133722149-133722330	ENSMUSG00000030986.13	chr7	133722149	133722330	-	182	0.165971	2.3601
Nsg1	neuron specific gene family member 1 [Source:MGI Symbol;Acc:MGI:109149]	chr5:38158877-38159362	ENSMUSG00000029126.7	chr5	38158877	38159362	-	486	0.165881	1.64473
Bicra	BRD4 interacting chromatin remodeling complex associated protein [Source:MGI Symbol;Acc:MGI:2154263]	chr7:15979351-15979986	ENSMUSG00000070808.4	chr7	15979351	15979986	-	636	0.165734	4.23108
Mrpl49	mitochondrial ribosomal protein L49 [Source:MGI Symbol;Acc:MGI:108180]	chr19:6055076-6055200	ENSMUSG00000007338.10	chr19	6055076	6055200	-	125	0.165597	2.06651
Rras	related RAS viral (r-ras) oncogene [Source:MGI Symbol;Acc:MGI:98179]	chr7:45021280-45021368	ENSMUSG00000038387.9	chr7	45021280	45021368	+	89	0.165428	2.18984
Mmab	methylmalonic aciduria (cobalamin deficiency) cblB type homolog (human) [Source:MGI Symbol;Acc:MGI:1924947]	chr5:114437050-114437122	ENSMUSG00000029575.17	chr5	114437050	114437122	-	73	0.165334	2.06917
Kri1	KRI1 homolog [Source:MGI Symbol;Acc:MGI:2384899]	chr9:21275269-21275393	ENSMUSG00000035047.9	chr9	21275269	21275393	-	125	0.164708	2.25811
Snip1	Smad nuclear interacting protein 1 [Source:MGI Symbol;Acc:MGI:2156003]	chr4:125066702-125066952	ENSMUSG00000050213.6	chr4	125066702	125066952	+	251	0.164578	1.98239
Snip1	Smad nuclear interacting protein 1 [Source:MGI Symbol;Acc:MGI:2156003]	chr4:125066672-125066952	ENSMUSG00000050213.6	chr4	125066672	125066952	+	281	0.164578	1.98239
Rit1	Ras-like without CAAX 1 [Source:MGI Symbol;Acc:MGI:108053]	chr3:88726280-88726319	ENSMUSG00000028057.14	chr3	88726280	88726319	+	40	0.164468	2.45049
Zfp207	zinc finger protein 207 [Source:MGI Symbol;Acc:MGI:1340045]	chr11:80404741-80405733	ENSMUSG00000017421.18	chr11	80404741	80405733	+	993	0.163901	1.47386
Cdc34	cell division cycle 34 [Source:MGI Symbol;Acc:MGI:102657]	chr10:79684818-79685122	ENSMUSG00000020307.15	chr10	79684818	79685122	+	305	0.16373	1.93047
Edc4	enhancer of mRNA decapping 4 [Source:MGI Symbol;Acc:MGI:2446249]	chr8:105881077-105881158	ENSMUSG00000036270.16	chr8	105881077	105881158	+	82	0.163476	1.64967
Yeats2	YEATS domain containing 2 [Source:MGI Symbol;Acc:MGI:2447762]	chr16:20207363-20207793	ENSMUSG00000041215.16	chr16	20207363	20207793	+	431	0.163447	2.21687
Septin3	septin 3 [Source:MGI Symbol;Acc:MGI:1345148]	chr15:82289195-82290234	ENSMUSG00000022456.18	chr15	82289195	82290234	+	1040	0.162992	0.71996
Septin3	septin 3 [Source:MGI Symbol;Acc:MGI:1345148]	chr15:82289195-82290235	ENSMUSG00000022456.18	chr15	82289195	82290235	+	1041	0.162992	0.71996
Tmem191c	transmembrane protein 191C [Source:MGI Symbol;Acc:MGI:107238]	chr16:17277972-17278661	ENSMUSG00000055692.21	chr16	17277972	17278661	+	690	0.162594	1.92696
Nemf	nuclear export mediator factor [Source:MGI Symbol;Acc:MGI:1918305]	chr12:69314416-69314632	ENSMUSG00000020982.9	chr12	69314416	69314632	-	217	0.162406	1.27615
Kif20a	kinesin family member 20A [Source:MGI Symbol;Acc:MGI:1201682]	chr18:34631926-34632063	ENSMUSG00000003779.16	chr18	34631926	34632063	+	138	0.162158	2.09104
Pgam1	phosphoglycerate mutase 1 [Source:MGI Symbol;Acc:MGI:97552]	chr19:41912076-41912186	ENSMUSG00000011752.7	chr19	41912076	41912186	+	111	0.162149	1.31809
Abcf2	ATP-binding cassette, sub-family F (GCN20), member 2 [Source:MGI Symbol;Acc:MGI:1351657]	chr5:24569071-24569166	ENSMUSG00000028953.10	chr5	24569071	24569166	-	96	0.162075	1.56261
Tmem191c	transmembrane protein 191C [Source:MGI Symbol;Acc:MGI:107238]	chr16:17277972-17278657	ENSMUSG00000055692.21	chr16	17277972	17278657	+	686	0.161911	1.92337
Ube2k	ubiquitin-conjugating enzyme E2K [Source:MGI Symbol;Acc:MGI:1858216]	chr5:65594875-65595755	ENSMUSG00000029203.16	chr5	65594875	65595755	+	881	0.161046	1.94571
Kifc1	kinesin family member C1 [Source:MGI Symbol;Acc:MGI:109596]	chr17:33882602-33883878	ENSMUSG00000079553.11	chr17	33882602	33883878	-	1277	0.161031	2.81535
Ccdc97	coiled-coil domain containing 97 [Source:MGI Symbol;Acc:MGI:1196455]	chr7:25718896-25718991	ENSMUSG00000002608.8	chr7	25718896	25718991	-	96	0.16098	1.77662
Pcbp4	poly(rC) binding protein 4 [Source:MGI Symbol;Acc:MGI:1890471]	chr9:106462508-106462944	ENSMUSG00000023495.13	chr9	106462508	106462944	+	437	0.160844	1.64828
Cdh10	cadherin 10 [Source:MGI Symbol;Acc:MGI:107436]	chr15:18818947-18819087	ENSMUSG00000022321.15	chr15	18818947	18819087	+	141	0.160658	1.70698
Prkcb	protein kinase C, beta [Source:MGI Symbol;Acc:MGI:97596]	chr7:122593921-122596714	ENSMUSG00000052889.11	chr7	122593921	122596714	+	2794	0.160282	0.755218
Mtmr6	myotubularin related protein 6 [Source:MGI Symbol;Acc:MGI:2145637]	chr14:60296574-60296774	ENSMUSG00000021987.9	chr14	60296574	60296774	+	201	0.160276	1.603
Sgip1	SH3-domain GRB2-like (endophilin) interacting protein 1 [Source:MGI Symbol;Acc:MGI:1920344]	chr4:102918781-102919120	ENSMUSG00000028524.21	chr4	102918781	102919120	+	340	0.160174	2.41727
Zfp354b	zinc finger protein 354B [Source:MGI Symbol;Acc:MGI:1351476]	chr11:50922291-50923840	ENSMUSG00000020335.13	chr11	50922291	50923840	-	1550	0.160107	2.17368
Fgf12	fibroblast growth factor 12 [Source:MGI Symbol;Acc:MGI:109183]	chr16:28396945-28398388	ENSMUSG00000022523.10	chr16	28396945	28398388	-	1444	0.159707	1.66104
Pld3	phospholipase D family, member 3 [Source:MGI Symbol;Acc:MGI:1333782]	chr7:27539555-27539669	ENSMUSG00000003363.15	chr7	27539555	27539669	-	115	0.159667	2.0412
Phf20	PHD finger protein 20 [Source:MGI Symbol;Acc:MGI:2444148]	chr2:156276489-156276668	ENSMUSG00000038116.16	chr2	156276489	156276668	+	180	0.159594	2.22146
Cog4	component of oligomeric golgi complex 4 [Source:MGI Symbol;Acc:MGI:2142808]	chr8:110880988-110881499	ENSMUSG00000031753.16	chr8	110880988	110881499	+	512	0.159492	2.56141
Pigq	phosphatidylinositol glycan anchor biosynthesis, class Q [Source:MGI Symbol;Acc:MGI:1333114]	chr17:25931674-25932231	ENSMUSG00000025728.16	chr17	25931674	25932231	-	558	0.159249	2.38894
Adat1	adenosine deaminase, tRNA-specific 1 [Source:MGI Symbol;Acc:MGI:1353631]	chr8:111990205-111990412	ENSMUSG00000031949.17	chr8	111990205	111990412	-	208	0.159215	2.71588
Galt	galactose-1-phosphate uridyl transferase [Source:MGI Symbol;Acc:MGI:95638]	chr4:41755228-41755652	ENSMUSG00000036073.17	chr4	41755228	41755652	+	425	0.159077	0.991457
Arf1	ADP-ribosylation factor 1 [Source:MGI Symbol;Acc:MGI:99431]	chr11:59227876-59228162	ENSMUSG00000048076.14	chr11	59227876	59228162	-	287	0.158994	0.406467
Src	Rous sarcoma oncogene [Source:MGI Symbol;Acc:MGI:98397]	chr2:157424116-157424414	ENSMUSG00000027646.15	chr2	157424116	157424414	+	299	0.158922	1.23353
Dcxr	dicarbonyl L-xylulose reductase [Source:MGI Symbol;Acc:MGI:1915130]	chr11:120726088-120726311	ENSMUSG00000039450.11	chr11	120726088	120726311	-	224	0.158742	1.67989
Hmgcl	3-hydroxy-3-methylglutaryl-Coenzyme A lyase [Source:MGI Symbol;Acc:MGI:96158]	chr4:135960783-135960908	ENSMUSG00000028672.13	chr4	135960783	135960908	+	126	0.15858	2.40031
Hdgfl3	HDGF like 3 [Source:MGI Symbol;Acc:MGI:1352760]	chr7:81897811-81899829	ENSMUSG00000025104.13	chr7	81897811	81899829	-	2019	0.158234	2.32336
Amz2	archaelysin family metallopeptidase 2 [Source:MGI Symbol;Acc:MGI:104837]	chr11:109426486-109426575	ENSMUSG00000020610.17	chr11	109426486	109426575	+	90	0.157634	3.00083
Drd2	dopamine receptor D2 [Source:MGI Symbol;Acc:MGI:94924]	chr9:49395585-49395900	ENSMUSG00000032259.8	chr9	49395585	49395900	+	316	0.157418	1.29551
Psmg3	proteasome (prosome, macropain) assembly chaperone 3 [Source:MGI Symbol;Acc:MGI:1913756]	chr5:139824475-139826875	ENSMUSG00000029551.13	chr5	139824475	139826875	-	2401	0.157057	1.45871
Helz	helicase with zinc finger domain [Source:MGI Symbol;Acc:MGI:1925705]	chr11:107671047-107672287	ENSMUSG00000020721.16	chr11	107671047	107672287	+	1241	0.156958	1.11809
Ssx2ip	synovial sarcoma, X 2 interacting protein [Source:MGI Symbol;Acc:MGI:2139150]	chr3:146417607-146417790	ENSMUSG00000036825.12	chr3	146417607	146417790	+	184	0.156346	1.95299
Pqbp1	polyglutamine binding protein 1 [Source:MGI Symbol;Acc:MGI:1859638]	chrX:7895604-7895882	ENSMUSG00000031157.10	chrX	7895604	7895882	-	279	0.155699	1.5598
Ankrd11	ankyrin repeat domain 11 [Source:MGI Symbol;Acc:MGI:1924337]	chr8:122900602-122903725	ENSMUSG00000035569.17	chr8	122900602	122903725	-	3124	0.155696	0.989052
Nanos3	nanos C2HC-type zinc finger 3 [Source:MGI Symbol;Acc:MGI:2675387]	chr8:84176063-84176552	ENSMUSG00000056155.6	chr8	84176063	84176552	-	490	0.155649	1.2284
Mrgbp	MRG/MORF4L binding protein [Source:MGI Symbol;Acc:MGI:1920497]	chr2:180584406-180584871	ENSMUSG00000027569.15	chr2	180584406	180584871	+	466	0.155372	1.97753
Atp5c1	ATP synthase, H+ transporting, mitochondrial F1 complex, gamma polypeptide 1 [Source:MGI Symbol;Acc:MGI:1261437]	chr2:10080020-10080176	ENSMUSG00000025781.14	chr2	10080020	10080176	-	157	0.155229	1.7129
Alkbh6	alkB homolog 6 [Source:MGI Symbol;Acc:MGI:2142037]	chr7:30311127-30311900	ENSMUSG00000042831.13	chr7	30311127	30311900	+	774	0.155167	1.17664
Sgsm2	small G protein signaling modulator 2 [Source:MGI Symbol;Acc:MGI:2144695]	chr11:74856567-74857800	ENSMUSG00000038351.14	chr11	74856567	74857800	-	1234	0.154947	0.853218
Inpp4a	inositol polyphosphate-4-phosphatase, type I [Source:MGI Symbol;Acc:MGI:1931123]	chr1:37387698-37387870	ENSMUSG00000026113.17	chr1	37387698	37387870	+	173	0.154911	1.69871
Agpat1	1-acylglycerol-3-phosphate O-acyltransferase 1 (lysophosphatidic acid acyltransferase, alpha) [Source:MGI Symbol;Acc:MGI:1932075]	chr17:34611274-34611449	ENSMUSG00000034254.17	chr17	34611274	34611449	+	176	0.154548	2.17406
St13	suppression of tumorigenicity 13 [Source:MGI Symbol;Acc:MGI:1917606]	chr15:81390578-81394603	ENSMUSG00000022403.15	chr15	81390578	81394603	-	4026	0.154211	1.82916
Cdc34	cell division cycle 34 [Source:MGI Symbol;Acc:MGI:102657]	chr10:79685005-79685367	ENSMUSG00000020307.15	chr10	79685005	79685367	+	363	0.154206	2.19426
Usp4	ubiquitin specific peptidase 4 (proto-oncogene) [Source:MGI Symbol;Acc:MGI:98905]	chr9:108356411-108357825	ENSMUSG00000032612.14	chr9	108356411	108357825	+	1415	0.154127	1.08988
Hbp1	high mobility group box transcription factor 1 [Source:MGI Symbol;Acc:MGI:894659]	chr12:31929383-31931005	ENSMUSG00000002996.17	chr12	31929383	31931005	-	1623	0.15408	1.72033
Eral1	Era (G-protein)-like 1 (E. coli) [Source:MGI Symbol;Acc:MGI:1889295]	chr11:78080077-78080383	ENSMUSG00000020832.14	chr11	78080077	78080383	-	307	0.153914	1.28717
Eno2	enolase 2, gamma neuronal [Source:MGI Symbol;Acc:MGI:95394]	chr6:124761217-124761362	ENSMUSG00000004267.16	chr6	124761217	124761362	-	146	0.153771	3.72681
Vps28	vacuolar protein sorting 28 [Source:MGI Symbol;Acc:MGI:1914164]	chr15:76623389-76623494	ENSMUSG00000115987.1	chr15	76623389	76623494	-	106	0.153702	2.09385
Lrig1	leucine-rich repeats and immunoglobulin-like domains 1 [Source:MGI Symbol;Acc:MGI:107935]	chr6:94609617-94609898	ENSMUSG00000030029.14	chr6	94609617	94609898	-	282	0.153689	1.85116
B4galnt4	beta-1,4-N-acetyl-galactosaminyl transferase 4 [Source:MGI Symbol;Acc:MGI:2652891]	chr7:141067700-141067800	ENSMUSG00000055629.5	chr7	141067700	141067800	+	101	0.153676	1.89281
Mtmr6	myotubularin related protein 6 [Source:MGI Symbol;Acc:MGI:2145637]	chr14:60296255-60296774	ENSMUSG00000021987.9	chr14	60296255	60296774	+	520	0.153592	1.10845
Fbxl18	F-box and leucine-rich repeat protein 18 [Source:MGI Symbol;Acc:MGI:2444450]	chr5:142872052-142872233	ENSMUSG00000066640.11	chr5	142872052	142872233	-	182	0.153087	2.25685
Map1lc3a	microtubule-associated protein 1 light chain 3 alpha [Source:MGI Symbol;Acc:MGI:1915661]	chr2:155277098-155277204	ENSMUSG00000027602.9	chr2	155277098	155277204	+	107	0.153052	1.96496
Pcna	proliferating cell nuclear antigen [Source:MGI Symbol;Acc:MGI:97503]	chr2:132252816-132253314	ENSMUSG00000027342.14	chr2	132252816	132253314	-	499	0.152977	2.15186
Rundc3a	RUN domain containing 3A [Source:MGI Symbol;Acc:MGI:1858752]	chr11:102400894-102401000	ENSMUSG00000006575.14	chr11	102400894	102401000	+	107	0.152899	3.00735
Ccdc50	coiled-coil domain containing 50 [Source:MGI Symbol;Acc:MGI:1914751]	chr16:27438301-27439669	ENSMUSG00000038127.15	chr16	27438301	27439669	+	1369	0.152655	0.994742
Abhd11	abhydrolase domain containing 11 [Source:MGI Symbol;Acc:MGI:1916008]	chr5:135011484-135011665	ENSMUSG00000040532.14	chr5	135011484	135011665	+	182	0.152586	2.27693
Adcyap1	adenylate cyclase activating polypeptide 1 [Source:MGI Symbol;Acc:MGI:105094]	chr17:93199168-93199622	ENSMUSG00000024256.7	chr17	93199168	93199622	+	455	0.152328	1.75251
Krit1	KRIT1, ankyrin repeat containing [Source:MGI Symbol;Acc:MGI:1930618]	chr5:3813051-3813194	ENSMUSG00000000600.15	chr5	3813051	3813194	+	144	0.15217	2.4119
Ccnyl1	cyclin Y-like 1 [Source:MGI Symbol;Acc:MGI:2138614]	chr1:64723523-64723946	ENSMUSG00000070871.10	chr1	64723523	64723946	+	424	0.152073	1.86211
Galnt10	polypeptide N-acetylgalactosaminyltransferase 10 [Source:MGI Symbol;Acc:MGI:1890480]	chr11:57783690-57783839	ENSMUSG00000020520.14	chr11	57783690	57783839	+	150	0.152071	2.53123
Arel1	apoptosis resistant E3 ubiquitin protein ligase 1 [Source:MGI Symbol;Acc:MGI:1915747]	chr12:84926234-84926413	ENSMUSG00000042350.13	chr12	84926234	84926413	-	180	0.152032	1.68677
Mbtps1	membrane-bound transcription factor peptidase, site 1 [Source:MGI Symbol;Acc:MGI:1927235]	chr8:119515578-119518279	ENSMUSG00000031835.16	chr8	119515578	119518279	-	2702	0.151941	1.51487
Rab3c	RAB3C, member RAS oncogene family [Source:MGI Symbol;Acc:MGI:1914545]	chr13:110277305-110280150	ENSMUSG00000021700.10	chr13	110277305	110280150	-	2846	0.151836	0.46979
Rbfa	ribosome binding factor A [Source:MGI Symbol;Acc:MGI:1915981]	chr18:80197664-80197883	ENSMUSG00000024570.7	chr18	80197664	80197883	-	220	0.151578	1.49424
Taf5	TATA-box binding protein associated factor 5 [Source:MGI Symbol;Acc:MGI:2442144]	chr19:47075997-47076132	ENSMUSG00000025049.6	chr19	47075997	47076132	+	136	0.151513	1.42287
Zdhhc16	zinc finger, DHHC domain containing 16 [Source:MGI Symbol;Acc:MGI:1921418]	chr19:41941516-41941639	ENSMUSG00000025157.8	chr19	41941516	41941639	+	124	0.151285	2.22093
Stard3nl	STARD3 N-terminal like [Source:MGI Symbol;Acc:MGI:1923455]	chr13:19376556-19376661	ENSMUSG00000003062.13	chr13	19376556	19376661	-	106	0.151283	2.41029
Nab2	Ngfi-A binding protein 2 [Source:MGI Symbol;Acc:MGI:107563]	chr10:127660919-127661779	ENSMUSG00000025402.12	chr10	127660919	127661779	-	861	0.151177	2.3119
Nab2	Ngfi-A binding protein 2 [Source:MGI Symbol;Acc:MGI:107563]	chr10:127660918-127661779	ENSMUSG00000025402.12	chr10	127660918	127661779	-	862	0.150956	2.29308
Atp2b1	ATPase, Ca++ transporting, plasma membrane 1 [Source:MGI Symbol;Acc:MGI:104653]	chr10:98990880-98994567	ENSMUSG00000019943.10	chr10	98990880	98994567	+	3688	0.150819	0.88293
Csnk2b	casein kinase 2, beta polypeptide [Source:MGI Symbol;Acc:MGI:88548]	chr17:35121794-35121998	ENSMUSG00000024387.13	chr17	35121794	35121998	-	205	0.150677	0.541256
Elmod1	ELMO/CED-12 domain containing 1 [Source:MGI Symbol;Acc:MGI:3583900]	chr9:53925708-53927026	ENSMUSG00000041986.16	chr9	53925708	53927026	-	1319	0.150504	1.08156
Ctsb	cathepsin B [Source:MGI Symbol;Acc:MGI:88561]	chr14:63122514-63123782	ENSMUSG00000021939.8	chr14	63122514	63123782	+	1269	0.149783	0.412592
Tro	trophinin [Source:MGI Symbol;Acc:MGI:1928994]	chrX:150650434-150650548	ENSMUSG00000025272.16	chrX	150650434	150650548	-	115	0.149735	1.51004
Snrnp27	small nuclear ribonucleoprotein 27 (U4/U6.U5) [Source:MGI Symbol;Acc:MGI:1913868]	chr6:86675151-86675580	ENSMUSG00000001158.13	chr6	86675151	86675580	-	430	0.149503	1.88121
Gnb4	guanine nucleotide binding protein (G protein), beta 4 [Source:MGI Symbol;Acc:MGI:104581]	chr3:32592211-32596383	ENSMUSG00000027669.14	chr3	32592211	32596383	-	4173	0.149494	1.00018
Smarcd1	SWI/SNF related, matrix associated, actin dependent regulator of chromatin, subfamily d, member 1 [Source:MGI Symbol;Acc:MGI:1933623]	chr15:99712372-99712811	ENSMUSG00000023018.5	chr15	99712372	99712811	+	440	0.149372	2.14889
Rsph10b	radial spoke head 10 homolog B (Chlamydomonas) [Source:MGI Symbol;Acc:MGI:1922386]	chr5:143950285-143950459	ENSMUSG00000075569.10	chr5	143950285	143950459	+	175	0.149069	1.58995
Spcs2	signal peptidase complex subunit 2 homolog (S. cerevisiae) [Source:MGI Symbol;Acc:MGI:1913874]	chr7:99840692-99840824	ENSMUSG00000035227.7	chr7	99840692	99840824	-	133	0.149018	1.97873
St8sia5	ST8 alpha-N-acetyl-neuraminide alpha-2,8-sialyltransferase 5 [Source:MGI Symbol;Acc:MGI:109243]	chr18:77253017-77253109	ENSMUSG00000025425.18	chr18	77253017	77253109	+	93	0.148888	1.508
Mob3a	MOB kinase activator 3A [Source:MGI Symbol;Acc:MGI:3050117]	chr10:80691206-80691567	ENSMUSG00000003348.10	chr10	80691206	80691567	-	362	0.148789	1.73155
Slc4a3	solute carrier family 4 (anion exchanger), member 3 [Source:MGI Symbol;Acc:MGI:109350]	chr1:75546527-75546613	ENSMUSG00000006576.16	chr1	75546527	75546613	+	87	0.148205	1.78463
Slc4a3	solute carrier family 4 (anion exchanger), member 3 [Source:MGI Symbol;Acc:MGI:109350]	chr1:75546496-75546613	ENSMUSG00000006576.16	chr1	75546496	75546613	+	118	0.148205	1.78463
Slc4a3	solute carrier family 4 (anion exchanger), member 3 [Source:MGI Symbol;Acc:MGI:109350]	chr1:75546533-75546613	ENSMUSG00000006576.16	chr1	75546533	75546613	+	81	0.148205	1.78463
Rrp9	ribosomal RNA processing 9, U3 small nucleolar RNA binding protein [Source:MGI Symbol;Acc:MGI:2384313]	chr9:106482912-106483211	ENSMUSG00000041506.15	chr9	106482912	106483211	+	300	0.148185	1.84478
Acat3	acetyl-Coenzyme A acetyltransferase 3 [Source:MGI Symbol;Acc:MGI:109182]	chr17:12927338-12927682	ENSMUSG00000062480.12	chr17	12927338	12927682	-	345	0.148068	0.700031
Kpna3	karyopherin (importin) alpha 3 [Source:MGI Symbol;Acc:MGI:1100863]	chr14:61370871-61370975	ENSMUSG00000021929.9	chr14	61370871	61370975	-	105	0.147843	1.76328
Smyd5	SET and MYND domain containing 5 [Source:MGI Symbol;Acc:MGI:108048]	chr6:85440106-85440342	ENSMUSG00000033706.13	chr6	85440106	85440342	+	237	0.147818	1.28625
Ctr9	CTR9 homolog, Paf1/RNA polymerase II complex component [Source:MGI Symbol;Acc:MGI:109345]	chr7:111045377-111045465	ENSMUSG00000005609.16	chr7	111045377	111045465	+	89	0.147556	2.07537
Zc3h14	zinc finger CCCH type containing 14 [Source:MGI Symbol;Acc:MGI:1919824]	chr12:98747000-98750077	ENSMUSG00000021012.16	chr12	98747000	98750077	+	3078	0.147152	0.563045
Sgip1	SH3-domain GRB2-like (endophilin) interacting protein 1 [Source:MGI Symbol;Acc:MGI:1920344]	chr4:102918781-102918855	ENSMUSG00000028524.21	chr4	102918781	102918855	+	75	0.147121	2.64135
Zdhhc16	zinc finger, DHHC domain containing 16 [Source:MGI Symbol;Acc:MGI:1921418]	chr19:41941370-41941639	ENSMUSG00000025157.8	chr19	41941370	41941639	+	270	0.14704	1.67731
Polr1e	polymerase (RNA) I polypeptide E [Source:MGI Symbol;Acc:MGI:1929022]	chr4:45028003-45028099	ENSMUSG00000028318.14	chr4	45028003	45028099	+	97	0.14692	1.94377
Map4k5	mitogen-activated protein kinase kinase kinase kinase 5 [Source:MGI Symbol;Acc:MGI:1925503]	chr12:69807198-69809282	ENSMUSG00000034761.15	chr12	69807198	69809282	-	2085	0.146766	1.13961
Mical1	microtubule associated monooxygenase, calponin and LIM domain containing 1 [Source:MGI Symbol;Acc:MGI:2385847]	chr10:41485766-41485879	ENSMUSG00000019823.17	chr10	41485766	41485879	+	114	0.146741	2.20223
Pcyox1l	prenylcysteine oxidase 1 like [Source:MGI Symbol;Acc:MGI:3606062]	chr18:61702884-61703718	ENSMUSG00000024579.7	chr18	61702884	61703718	-	835	0.146675	1.78587
Ercc1	excision repair cross-complementing rodent repair deficiency, complementation group 1 [Source:MGI Symbol;Acc:MGI:95412]	chr7:19354326-19354843	ENSMUSG00000003549.9	chr7	19354326	19354843	+	518	0.1462	1.91703
Zfand5	zinc finger, AN1-type domain 5 [Source:MGI Symbol;Acc:MGI:1278334]	chr19:21275980-21277089	ENSMUSG00000024750.11	chr19	21275980	21277089	+	1110	0.145954	1.94073
Hsp90aa1	heat shock protein 90, alpha (cytosolic), class A member 1 [Source:MGI Symbol;Acc:MGI:96250]	chr12:110692604-110692872	ENSMUSG00000021270.13	chr12	110692604	110692872	-	269	0.145758	1.42614
Impdh1	inosine monophosphate dehydrogenase 1 [Source:MGI Symbol;Acc:MGI:96567]	chr6:29216072-29216364	ENSMUSG00000003500.13	chr6	29216072	29216364	-	293	0.145292	0.699973
Impdh1	inosine monophosphate dehydrogenase 1 [Source:MGI Symbol;Acc:MGI:96567]	chr6:29216072-29216277	ENSMUSG00000003500.13	chr6	29216072	29216277	-	206	0.145292	0.699973
Impdh1	inosine monophosphate dehydrogenase 1 [Source:MGI Symbol;Acc:MGI:96567]	chr6:29216072-29216342	ENSMUSG00000003500.13	chr6	29216072	29216342	-	271	0.145292	0.699973
Impdh1	inosine monophosphate dehydrogenase 1 [Source:MGI Symbol;Acc:MGI:96567]	chr6:29216072-29216331	ENSMUSG00000003500.13	chr6	29216072	29216331	-	260	0.145292	0.699973
Zmym4	zinc finger, MYM-type 4 [Source:MGI Symbol;Acc:MGI:1915035]	chr4:126882440-126882611	ENSMUSG00000042446.16	chr4	126882440	126882611	-	172	0.145274	1.57343
Trrap	transformation/transcription domain-associated protein [Source:MGI Symbol;Acc:MGI:2153272]	chr5:144838985-144839596	ENSMUSG00000045482.16	chr5	144838985	144839596	+	612	0.14523	1.55705
Tatdn2	TatD DNase domain containing 2 [Source:MGI Symbol;Acc:MGI:3576210]	chr6:113697673-113698117	ENSMUSG00000056952.13	chr6	113697673	113698117	+	445	0.144974	1.68162
Arhgef40	Rho guanine nucleotide exchange factor (GEF) 40 [Source:MGI Symbol;Acc:MGI:2685515]	chr14:52003654-52003963	ENSMUSG00000004562.16	chr14	52003654	52003963	+	310	0.144707	2.03501
Ep400	E1A binding protein p400 [Source:MGI Symbol;Acc:MGI:1276124]	chr5:110693420-110693622	ENSMUSG00000029505.17	chr5	110693420	110693622	-	203	0.144679	1.11364
Maged1	MAGE family member D1 [Source:MGI Symbol;Acc:MGI:1930187]	chrX:94537676-94537755	ENSMUSG00000025151.16	chrX	94537676	94537755	-	80	0.144556	1.19878
Mcee	methylmalonyl CoA epimerase [Source:MGI Symbol;Acc:MGI:1920974]	chr7:64400169-64400506	ENSMUSG00000033429.10	chr7	64400169	64400506	+	338	0.144218	1.59866
Ube2f	ubiquitin-conjugating enzyme E2F (putative) [Source:MGI Symbol;Acc:MGI:1915171]	chr1:91274964-91275317	ENSMUSG00000034343.14	chr1	91274964	91275317	+	354	0.14405	1.31081
Zranb2	zinc finger, RAN-binding domain containing 2 [Source:MGI Symbol;Acc:MGI:1858211]	chr3:157534376-157534474	ENSMUSG00000028180.18	chr3	157534376	157534474	+	99	0.143905	1.27703
Tatdn2	TatD DNase domain containing 2 [Source:MGI Symbol;Acc:MGI:3576210]	chr6:113697707-113698117	ENSMUSG00000056952.13	chr6	113697707	113698117	+	411	0.143823	1.83375
Gabarapl2	gamma-aminobutyric acid (GABA) A receptor-associated protein-like 2 [Source:MGI Symbol;Acc:MGI:1890602]	chr8:111942502-111942674	ENSMUSG00000031950.7	chr8	111942502	111942674	+	173	0.143527	2.02519
Ppp6r3	protein phosphatase 6, regulatory subunit 3 [Source:MGI Symbol;Acc:MGI:1921807]	chr19:3467141-3467294	ENSMUSG00000024908.15	chr19	3467141	3467294	-	154	0.143033	2.48903
Actr8	ARP8 actin-related protein 8 [Source:MGI Symbol;Acc:MGI:1860775]	chr14:29991870-29995867	ENSMUSG00000015971.5	chr14	29991870	29995867	+	3998	0.142842	1.28705
Slc44a2	solute carrier family 44, member 2 [Source:MGI Symbol;Acc:MGI:1915932]	chr9:21345593-21345993	ENSMUSG00000057193.8	chr9	21345593	21345993	+	401	0.142563	1.47632
Tpt1	tumor protein, translationally-controlled 1 [Source:MGI Symbol;Acc:MGI:104890]	chr14:75846203-75846892	ENSMUSG00000060126.14	chr14	75846203	75846892	+	690	0.142461	1.79116
Tars	threonyl-tRNA synthetase [Source:MGI Symbol;Acc:MGI:106314]	chr15:11387263-11387367	ENSMUSG00000022241.6	chr15	11387263	11387367	-	105	0.14225	1.68933
Fam110b	family with sequence similarity 110, member B [Source:MGI Symbol;Acc:MGI:1916593]	chr4:5729571-5733523	ENSMUSG00000049119.14	chr4	5729571	5733523	+	3953	0.141839	0.503652
Hmces	5-hydroxymethylcytosine (hmC) binding, ES cell specific [Source:MGI Symbol;Acc:MGI:1914053]	chr6:87914306-87914695	ENSMUSG00000030060.14	chr6	87914306	87914695	+	390	0.141302	1.58419
Cops9	COP9 signalosome subunit 9 [Source:MGI Symbol;Acc:MGI:1914165]	chr1:92641607-92641923	ENSMUSG00000073616.10	chr1	92641607	92641923	-	317	0.141171	1.00474
Stradb	STE20-related kinase adaptor beta [Source:MGI Symbol;Acc:MGI:2144047]	chr1:58985289-58985388	ENSMUSG00000026027.13	chr1	58985289	58985388	+	100	0.1411	1.82154
Asnsd1	asparagine synthetase domain containing 1 [Source:MGI Symbol;Acc:MGI:1917646]	chr1:53352530-53352752	ENSMUSG00000026095.15	chr1	53352530	53352752	-	223	0.14108	2.57383
Dcaf1	DDB1 and CUL4 associated factor 1 [Source:MGI Symbol;Acc:MGI:2445220]	chr9:106851732-106853625	ENSMUSG00000040325.16	chr9	106851732	106853625	+	1894	0.140854	0.44191
Stag2	stromal antigen 2 [Source:MGI Symbol;Acc:MGI:1098583]	chrX:42246966-42247058	ENSMUSG00000025862.14	chrX	42246966	42247058	+	93	0.140759	1.67255
Dcaf6	DDB1 and CUL4 associated factor 6 [Source:MGI Symbol;Acc:MGI:1921356]	chr1:165351961-165351998	ENSMUSG00000026571.12	chr1	165351961	165351998	-	38	0.14075	2.3303
Fubp3	far upstream element (FUSE) binding protein 3 [Source:MGI Symbol;Acc:MGI:2443699]	chr2:31612837-31612908	ENSMUSG00000026843.15	chr2	31612837	31612908	+	72	0.140715	2.39005
Ptprd	protein tyrosine phosphatase, receptor type, D [Source:MGI Symbol;Acc:MGI:97812]	chr4:75950651-75950805	ENSMUSG00000028399.18	chr4	75950651	75950805	-	155	0.140265	2.06955
Tfip11	tuftelin interacting protein 11 [Source:MGI Symbol;Acc:MGI:1930075]	chr5:112335642-112336180	ENSMUSG00000029345.13	chr5	112335642	112336180	+	539	0.140201	2.1339
Pgam1	phosphoglycerate mutase 1 [Source:MGI Symbol;Acc:MGI:97552]	chr19:41912038-41912121	ENSMUSG00000011752.7	chr19	41912038	41912121	+	84	0.140193	1.20478
Gabrd	gamma-aminobutyric acid (GABA) A receptor, subunit delta [Source:MGI Symbol;Acc:MGI:95622]	chr4:155385935-155386146	ENSMUSG00000029054.8	chr4	155385935	155386146	-	212	0.139823	2.04499
Tbk1	TANK-binding kinase 1 [Source:MGI Symbol;Acc:MGI:1929658]	chr10:121555987-121556065	ENSMUSG00000020115.3	chr10	121555987	121556065	-	79	0.139599	1.83536
Atp5c1	ATP synthase, H+ transporting, mitochondrial F1 complex, gamma polypeptide 1 [Source:MGI Symbol;Acc:MGI:1261437]	chr2:10079686-10080055	ENSMUSG00000025781.14	chr2	10079686	10080055	-	370	0.139302	0.657477
Tsen34	tRNA splicing endonuclease subunit 34 [Source:MGI Symbol;Acc:MGI:1913328]	chr7:3693801-3694058	ENSMUSG00000035585.16	chr7	3693801	3694058	+	258	0.138872	1.68331
Ppil2	peptidylprolyl isomerase (cyclophilin)-like 2 [Source:MGI Symbol;Acc:MGI:2447857]	chr16:17091175-17091517	ENSMUSG00000022771.17	chr16	17091175	17091517	-	343	0.138856	1.93188
Dbi	diazepam binding inhibitor [Source:MGI Symbol;Acc:MGI:94865]	chr1:120120121-120120170	ENSMUSG00000026385.16	chr1	120120121	120120170	-	50	0.138625	0.300529
Necab1	N-terminal EF-hand calcium binding protein 1 [Source:MGI Symbol;Acc:MGI:1916602]	chr4:14978155-14978231	ENSMUSG00000040536.15	chr4	14978155	14978231	-	77	0.138365	1.81997
Senp5	SUMO/sentrin specific peptidase 5 [Source:MGI Symbol;Acc:MGI:2443596]	chr16:31962506-31963537	ENSMUSG00000022772.12	chr16	31962506	31963537	-	1032	0.13785	2.20627
Nop16	NOP16 nucleolar protein [Source:MGI Symbol;Acc:MGI:107862]	chr13:54588598-54588667	ENSMUSG00000025869.11	chr13	54588598	54588667	-	70	0.137843	2.08282
Rbfox1	RNA binding protein, fox-1 homolog (C. elegans) 1 [Source:MGI Symbol;Acc:MGI:1926224]	chr16:7224310-7224550	ENSMUSG00000008658.16	chr16	7224310	7224550	+	241	0.137813	2.20525
Rbfox1	RNA binding protein, fox-1 homolog (C. elegans) 1 [Source:MGI Symbol;Acc:MGI:1926224]	chr16:7224311-7224550	ENSMUSG00000008658.16	chr16	7224311	7224550	+	240	0.137813	2.20525
Dctn2	dynactin 2 [Source:MGI Symbol;Acc:MGI:107733]	chr10:127276702-127276849	ENSMUSG00000025410.10	chr10	127276702	127276849	+	148	0.137779	2.04866
Nup88	nucleoporin 88 [Source:MGI Symbol;Acc:MGI:104900]	chr11:70945203-70945361	ENSMUSG00000040667.11	chr11	70945203	70945361	-	159	0.137768	2.95836
Dnajc2	DnaJ heat shock protein family (Hsp40) member C2 [Source:MGI Symbol;Acc:MGI:99470]	chr5:21761541-21763515	ENSMUSG00000029014.14	chr5	21761541	21763515	-	1975	0.13771	1.17998
Fam214a	family with sequence similarity 214, member A [Source:MGI Symbol;Acc:MGI:2387648]	chr9:74953909-74955684	ENSMUSG00000034858.16	chr9	74953909	74955684	+	1776	0.137277	0.602064
Arpin	actin-related protein 2/3 complex inhibitor [Source:MGI Symbol;Acc:MGI:1917670]	chr7:79925361-79926850	ENSMUSG00000039043.5	chr7	79925361	79926850	-	1490	0.13727	2.4767
Sucla2	succinate-Coenzyme A ligase, ADP-forming, beta subunit [Source:MGI Symbol;Acc:MGI:1306775]	chr14:73568862-73569024	ENSMUSG00000022110.13	chr14	73568862	73569024	+	163	0.137218	2.46588
Ripk1	receptor (TNFRSF)-interacting serine-threonine kinase 1 [Source:MGI Symbol;Acc:MGI:108212]	chr13:34032496-34033677	ENSMUSG00000021408.15	chr13	34032496	34033677	+	1182	0.137168	3.10676
Ddx56	DEAD box helicase 56 [Source:MGI Symbol;Acc:MGI:1277172]	chr11:6265512-6265756	ENSMUSG00000004393.10	chr11	6265512	6265756	-	245	0.13709	2.57445
Pdia4	protein disulfide isomerase associated 4 [Source:MGI Symbol;Acc:MGI:104864]	chr6:47800938-47801089	ENSMUSG00000025823.9	chr6	47800938	47801089	-	152	0.137086	1.79674
Jmjd8	jumonji domain containing 8 [Source:MGI Symbol;Acc:MGI:1919356]	chr17:25830510-25830721	ENSMUSG00000025736.15	chr17	25830510	25830721	+	212	0.13702	1.79864
Chd5	chromodomain helicase DNA binding protein 5 [Source:MGI Symbol;Acc:MGI:3036258]	chr4:152384485-152384680	ENSMUSG00000005045.16	chr4	152384485	152384680	+	196	0.136834	1.86
Pcnp	PEST proteolytic signal containing nuclear protein [Source:MGI Symbol;Acc:MGI:1923552]	chr16:56018472-56018527	ENSMUSG00000071533.11	chr16	56018472	56018527	-	56	0.136737	1.88631
Rtn1	reticulon 1 [Source:MGI Symbol;Acc:MGI:1933947]	chr12:72219257-72219395	ENSMUSG00000021087.18	chr12	72219257	72219395	-	139	0.136719	2.10638
H2-Ke6	H2-K region expressed gene 6 [Source:MGI Symbol;Acc:MGI:95911]	chr17:34027406-34027727	ENSMUSG00000073422.11	chr17	34027406	34027727	-	322	0.136515	2.53302
Tspan31	tetraspanin 31 [Source:MGI Symbol;Acc:MGI:1914375]	chr10:127070115-127070264	ENSMUSG00000006736.9	chr10	127070115	127070264	-	150	0.136035	0.852866
Vps41	VPS41 HOPS complex subunit [Source:MGI Symbol;Acc:MGI:1929215]	chr13:18844863-18847065	ENSMUSG00000041236.8	chr13	18844863	18847065	+	2203	0.135891	0.760962
Cox19	cytochrome c oxidase assembly protein 19 [Source:MGI Symbol;Acc:MGI:1915283]	chr5:139338140-139338375	ENSMUSG00000045438.12	chr5	139338140	139338375	-	236	0.135868	2.21211
Mcoln1	mucolipin 1 [Source:MGI Symbol;Acc:MGI:1890498]	chr8:3508684-3509235	ENSMUSG00000004567.16	chr8	3508684	3509235	+	552	0.135807	3.36799
Dalrd3	DALR anticodon binding domain containing 3 [Source:MGI Symbol;Acc:MGI:1915039]	chr9:108571007-108571674	ENSMUSG00000019039.14	chr9	108571007	108571674	+	668	0.135281	1.11229
Plcb1	phospholipase C, beta 1 [Source:MGI Symbol;Acc:MGI:97613]	chr2:135294849-135294995	ENSMUSG00000051177.16	chr2	135294849	135294995	+	147	0.135203	1.86812
Nbdy	negative regulator of P-body association [Source:MGI Symbol;Acc:MGI:1917373]	chrX:153741040-153741084	ENSMUSG00000086316.8	chrX	153741040	153741084	+	45	0.135143	2.72702
Kif3b	kinesin family member 3B [Source:MGI Symbol;Acc:MGI:107688]	chr2:153323537-153323642	ENSMUSG00000027475.9	chr2	153323537	153323642	+	106	0.135076	1.01206
Lpcat3	lysophosphatidylcholine acyltransferase 3 [Source:MGI Symbol;Acc:MGI:1315211]	chr6:124700007-124700278	ENSMUSG00000004270.13	chr6	124700007	124700278	+	272	0.135027	1.29004
Vps54	VPS54 GARP complex subunit [Source:MGI Symbol;Acc:MGI:2178798]	chr11:21314081-21316886	ENSMUSG00000020128.15	chr11	21314081	21316886	+	2806	0.134798	1.76938
Hnrnpl	heterogeneous nuclear ribonucleoprotein L [Source:MGI Symbol;Acc:MGI:104816]	chr7:28810672-28811168	ENSMUSG00000015165.16	chr7	28810672	28811168	+	497	0.13453	0.707263
Srsf10	serine and arginine-rich splicing factor 10 [Source:MGI Symbol;Acc:MGI:1333805]	chr4:135867126-135869908	ENSMUSG00000028676.17	chr4	135867126	135869908	+	2783	0.134456	1.57143
Vrk3	vaccinia related kinase 3 [Source:MGI Symbol;Acc:MGI:2182465]	chr7:44762991-44763055	ENSMUSG00000002205.16	chr7	44762991	44763055	+	65	0.134043	2.4233
Vrk3	vaccinia related kinase 3 [Source:MGI Symbol;Acc:MGI:2182465]	chr7:44762991-44763057	ENSMUSG00000002205.16	chr7	44762991	44763057	+	67	0.134043	2.4233
Mybbp1a	MYB binding protein (P160) 1a [Source:MGI Symbol;Acc:MGI:106181]	chr11:72446158-72446257	ENSMUSG00000040463.16	chr11	72446158	72446257	+	100	0.134024	2.0941
Brsk2	BR serine/threonine kinase 2 [Source:MGI Symbol;Acc:MGI:1923020]	chr7:142002475-142003171	ENSMUSG00000053046.16	chr7	142002475	142003171	+	697	0.133876	3.48525
Fam78b	family with sequence similarity 78, member B [Source:MGI Symbol;Acc:MGI:2443050]	chr1:167001417-167001828	ENSMUSG00000060568.14	chr1	167001417	167001828	+	412	0.133711	1.80878
Dhrs1	dehydrogenase/reductase (SDR family) member 1 [Source:MGI Symbol;Acc:MGI:1196314]	chr14:55740727-55740873	ENSMUSG00000002332.16	chr14	55740727	55740873	-	147	0.133434	1.74797
Trim67	tripartite motif-containing 67 [Source:MGI Symbol;Acc:MGI:3045323]	chr8:124828099-124828261	ENSMUSG00000036913.15	chr8	124828099	124828261	+	163	0.133411	2.13761
Sucla2	succinate-Coenzyme A ligase, ADP-forming, beta subunit [Source:MGI Symbol;Acc:MGI:1306775]	chr14:73568862-73569242	ENSMUSG00000022110.13	chr14	73568862	73569242	+	381	0.133048	2.64198
Pdia6	protein disulfide isomerase associated 6 [Source:MGI Symbol;Acc:MGI:1919103]	chr12:17280911-17281810	ENSMUSG00000020571.13	chr12	17280911	17281810	+	900	0.133047	1.36784
Pcsk7	proprotein convertase subtilisin/kexin type 7 [Source:MGI Symbol;Acc:MGI:107421]	chr9:45927037-45927118	ENSMUSG00000035382.9	chr9	45927037	45927118	+	82	0.133035	2.12908
Eif3g	eukaryotic translation initiation factor 3, subunit G [Source:MGI Symbol;Acc:MGI:1858258]	chr9:20898084-20898167	ENSMUSG00000070319.6	chr9	20898084	20898167	-	84	0.132723	1.85326
Kdm2a	lysine (K)-specific demethylase 2A [Source:MGI Symbol;Acc:MGI:1354736]	chr19:4317706-4319281	ENSMUSG00000054611.17	chr19	4317706	4319281	-	1576	0.132702	2.08047
Matk	megakaryocyte-associated tyrosine kinase [Source:MGI Symbol;Acc:MGI:99259]	chr10:81261631-81262534	ENSMUSG00000004933.17	chr10	81261631	81262534	+	904	0.132696	1.55389
Hcn3	hyperpolarization-activated, cyclic nucleotide-gated K+ 3 [Source:MGI Symbol;Acc:MGI:1298211]	chr3:89151481-89151586	ENSMUSG00000028051.10	chr3	89151481	89151586	-	106	0.13248	2.03301
Fam78b	family with sequence similarity 78, member B [Source:MGI Symbol;Acc:MGI:2443050]	chr1:167001432-167001828	ENSMUSG00000060568.14	chr1	167001432	167001828	+	397	0.132407	1.93964
Zfp507	zinc finger protein 507 [Source:MGI Symbol;Acc:MGI:1916378]	chr7:35775974-35776327	ENSMUSG00000044452.10	chr7	35775974	35776327	-	354	0.132321	2.3081
Nabp2	nucleic acid binding protein 2 [Source:MGI Symbol;Acc:MGI:1917167]	chr10:128409247-128409728	ENSMUSG00000025374.13	chr10	128409247	128409728	-	482	0.132129	0.979106
Smpd4	sphingomyelin phosphodiesterase 4 [Source:MGI Symbol;Acc:MGI:1924876]	chr16:17639745-17640289	ENSMUSG00000005899.14	chr16	17639745	17640289	+	545	0.132069	2.11947
Lingo1	leucine rich repeat and Ig domain containing 1 [Source:MGI Symbol;Acc:MGI:1915522]	chr9:56795990-56796298	ENSMUSG00000049556.5	chr9	56795990	56796298	-	309	0.132004	0.409725
H2-Ke6	H2-K region expressed gene 6 [Source:MGI Symbol;Acc:MGI:95911]	chr17:34027406-34027840	ENSMUSG00000073422.11	chr17	34027406	34027840	-	435	0.131925	2.26386
Tmem14c	transmembrane protein 14C [Source:MGI Symbol;Acc:MGI:1913404]	chr13:41017115-41017173	ENSMUSG00000021361.7	chr13	41017115	41017173	+	59	0.131907	2.63697
Dalrd3	DALR anticodon binding domain containing 3 [Source:MGI Symbol;Acc:MGI:1915039]	chr9:108571045-108571674	ENSMUSG00000019039.14	chr9	108571045	108571674	+	630	0.131762	1.12589
Ybx3	Y box protein 3 [Source:MGI Symbol;Acc:MGI:2137670]	chr6:131378140-131378241	ENSMUSG00000030189.15	chr6	131378140	131378241	-	102	0.13169	0.570357
Brd9	bromodomain containing 9 [Source:MGI Symbol;Acc:MGI:2145317]	chr13:73943896-73944858	ENSMUSG00000057649.6	chr13	73943896	73944858	+	963	0.131435	1.82379
Lsm14b	LSM family member 14B [Source:MGI Symbol;Acc:MGI:3040677]	chr2:180031361-180031528	ENSMUSG00000039108.14	chr2	180031361	180031528	+	168	0.131331	1.9398
Tnfrsf1a	tumor necrosis factor receptor superfamily, member 1a [Source:MGI Symbol;Acc:MGI:1314884]	chr6:125361687-125361874	ENSMUSG00000030341.17	chr6	125361687	125361874	+	188	0.131314	2.11158
Jakmip2	janus kinase and microtubule interacting protein 2 [Source:MGI Symbol;Acc:MGI:1923467]	chr18:43571054-43571194	ENSMUSG00000024502.10	chr18	43571054	43571194	-	141	0.131121	1.90506
Ints3	integrator complex subunit 3 [Source:MGI Symbol;Acc:MGI:2140050]	chr3:90411201-90411345	ENSMUSG00000027933.11	chr3	90411201	90411345	-	145	0.130924	0.899013
Rsrp1	arginine/serine rich protein 1 [Source:MGI Symbol;Acc:MGI:106498]	chr4:134924710-134925007	ENSMUSG00000037266.18	chr4	134924710	134925007	+	298	0.130718	0.19535
Snta1	syntrophin, acidic 1 [Source:MGI Symbol;Acc:MGI:101772]	chr2:154403722-154403907	ENSMUSG00000027488.12	chr2	154403722	154403907	-	186	0.130608	1.79517
Fam114a2	family with sequence similarity 114, member A2 [Source:MGI Symbol;Acc:MGI:1917629]	chr11:57493004-57493126	ENSMUSG00000020523.14	chr11	57493004	57493126	-	123	0.130526	1.95573
Sh2b1	SH2B adaptor protein 1 [Source:MGI Symbol;Acc:MGI:1201407]	chr7:126471122-126471297	ENSMUSG00000030733.10	chr7	126471122	126471297	-	176	0.130376	1.83585
Gtpbp2	GTP binding protein 2 [Source:MGI Symbol;Acc:MGI:1860138]	chr17:46167342-46167394	ENSMUSG00000023952.13	chr17	46167342	46167394	+	53	0.130061	2.42249
Tmem60	transmembrane protein 60 [Source:MGI Symbol;Acc:MGI:2673965]	chr5:20886189-20886870	ENSMUSG00000045435.9	chr5	20886189	20886870	+	682	0.130021	2.01825
Galm	galactose mutarotase [Source:MGI Symbol;Acc:MGI:2442420]	chr17:80183984-80185101	ENSMUSG00000035473.10	chr17	80183984	80185101	+	1118	0.129674	1.92527
Gatd1	glutamine amidotransferase like class 1 domain containing 1 [Source:MGI Symbol;Acc:MGI:2387178]	chr7:141409331-141409918	ENSMUSG00000051007.15	chr7	141409331	141409918	-	588	0.129554	1.53596
Sapcd2	suppressor APC domain containing 2 [Source:MGI Symbol;Acc:MGI:1919330]	chr2:25375968-25376274	ENSMUSG00000026955.13	chr2	25375968	25376274	+	307	0.129521	2.07551
Hsp90b1	heat shock protein 90, beta (Grp94), member 1 [Source:MGI Symbol;Acc:MGI:98817]	chr10:86694021-86694159	ENSMUSG00000020048.13	chr10	86694021	86694159	-	139	0.129206	2.66951
Ephb2	Eph receptor B2 [Source:MGI Symbol;Acc:MGI:99611]	chr4:136647539-136655430	ENSMUSG00000028664.14	chr4	136647539	136655430	-	7892	0.128761	1.78867
Fcho1	FCH domain only 1 [Source:MGI Symbol;Acc:MGI:1921265]	chr8:71715685-71715783	ENSMUSG00000070000.13	chr8	71715685	71715783	-	99	0.12873	1.37235
Mdm2	transformed mouse 3T3 cell double minute 2 [Source:MGI Symbol;Acc:MGI:96952]	chr10:117710552-117710685	ENSMUSG00000020184.15	chr10	117710552	117710685	-	134	0.128423	0.410615
Cipc	CLOCK interacting protein, circadian [Source:MGI Symbol;Acc:MGI:1919185]	chr12:86952657-86952931	ENSMUSG00000034157.12	chr12	86952657	86952931	+	275	0.128401	0.96099
Vps50	VPS50 EARP/GARPII complex subunit [Source:MGI Symbol;Acc:MGI:1920538]	chr6:3558977-3562358	ENSMUSG00000001376.17	chr6	3558977	3562358	+	3382	0.128384	1.35756
Vdac2	voltage-dependent anion channel 2 [Source:MGI Symbol;Acc:MGI:106915]	chr14:21833618-21833850	ENSMUSG00000021771.14	chr14	21833618	21833850	+	233	0.127897	1.38973
Ptpn1	protein tyrosine phosphatase, non-receptor type 1 [Source:MGI Symbol;Acc:MGI:97805]	chr2:167965010-167965067	ENSMUSG00000027540.13	chr2	167965010	167965067	+	58	0.127878	1.87403
Pnpla6	patatin-like phospholipase domain containing 6 [Source:MGI Symbol;Acc:MGI:1354723]	chr8:3536921-3537019	ENSMUSG00000004565.15	chr8	3536921	3537019	+	99	0.127751	2.19222
Efr3a	EFR3 homolog A [Source:MGI Symbol;Acc:MGI:1923990]	chr15:65866724-65867189	ENSMUSG00000015002.18	chr15	65866724	65867189	+	466	0.127689	1.34309
Otud6b	OTU domain containing 6B [Source:MGI Symbol;Acc:MGI:1919451]	chr4:14815603-14815664	ENSMUSG00000040550.17	chr4	14815603	14815664	-	62	0.127241	1.71338
Slc12a9	solute carrier family 12 (potassium/chloride transporters), member 9 [Source:MGI Symbol;Acc:MGI:1933532]	chr5:137329768-137331074	ENSMUSG00000037344.14	chr5	137329768	137331074	-	1307	0.127049	0.397781
Src	Rous sarcoma oncogene [Source:MGI Symbol;Acc:MGI:98397]	chr2:157424280-157424414	ENSMUSG00000027646.15	chr2	157424280	157424414	+	135	0.126958	1.16194
Pde1a	phosphodiesterase 1A, calmodulin-dependent [Source:MGI Symbol;Acc:MGI:1201792]	chr2:79875229-79875330	ENSMUSG00000059173.19	chr2	79875229	79875330	-	102	0.126897	1.50846
Mtmr6	myotubularin related protein 6 [Source:MGI Symbol;Acc:MGI:2145637]	chr14:60289543-60289677	ENSMUSG00000021987.9	chr14	60289543	60289677	+	135	0.126753	1.81423
Sipa1l2	signal-induced proliferation-associated 1 like 2 [Source:MGI Symbol;Acc:MGI:2676970]	chr8:125444486-125444710	ENSMUSG00000001995.9	chr8	125444486	125444710	-	225	0.126575	2.38533
Brsk2	BR serine/threonine kinase 2 [Source:MGI Symbol;Acc:MGI:1923020]	chr7:142002475-142003105	ENSMUSG00000053046.16	chr7	142002475	142003105	+	631	0.126378	2.75068
Metap2	methionine aminopeptidase 2 [Source:MGI Symbol;Acc:MGI:1929701]	chr10:93859826-93861602	ENSMUSG00000036112.15	chr10	93859826	93861602	-	1777	0.126099	1.86179
Trmt1l	tRNA methyltransferase 1 like [Source:MGI Symbol;Acc:MGI:1916185]	chr1:151435728-151436707	ENSMUSG00000053286.11	chr1	151435728	151436707	+	980	0.126052	1.20204
Whamm	WAS protein homolog associated with actin, golgi membranes and microtubules [Source:MGI Symbol;Acc:MGI:2142282]	chr7:81571266-81571909	ENSMUSG00000045795.10	chr7	81571266	81571909	+	644	0.125967	2.29665
Whamm	WAS protein homolog associated with actin, golgi membranes and microtubules [Source:MGI Symbol;Acc:MGI:2142282]	chr7:81571292-81571909	ENSMUSG00000045795.10	chr7	81571292	81571909	+	618	0.125967	2.29665
Cdh13	cadherin 13 [Source:MGI Symbol;Acc:MGI:99551]	chr8:118851719-118852758	ENSMUSG00000031841.19	chr8	118851719	118852758	+	1040	0.125773	0.950758
Prkce	protein kinase C, epsilon [Source:MGI Symbol;Acc:MGI:97599]	chr17:86654541-86655415	ENSMUSG00000045038.14	chr17	86654541	86655415	+	875	0.125676	2.31656
Naa38	N(alpha)-acetyltransferase 38, NatC auxiliary subunit [Source:MGI Symbol;Acc:MGI:1925554]	chr11:69396520-69396680	ENSMUSG00000059278.9	chr11	69396520	69396680	+	161	0.125605	1.92081
Ddx56	DEAD box helicase 56 [Source:MGI Symbol;Acc:MGI:1277172]	chr11:6265307-6265756	ENSMUSG00000004393.10	chr11	6265307	6265756	-	450	0.125517	2.07634
Ptbp2	polypyrimidine tract binding protein 2 [Source:MGI Symbol;Acc:MGI:1860489]	chr3:119726066-119726205	ENSMUSG00000028134.11	chr3	119726066	119726205	-	140	0.125463	2.70309
Clcn4	chloride channel, voltage-sensitive 4 [Source:MGI Symbol;Acc:MGI:104571]	chr7:7287646-7288443	ENSMUSG00000000605.9	chr7	7287646	7288443	-	798	0.125173	2.75415
Ap1ar	adaptor-related protein complex 1 associated regulatory protein [Source:MGI Symbol;Acc:MGI:2384822]	chr3:127819679-127822610	ENSMUSG00000074238.6	chr3	127819679	127822610	-	2932	0.124958	0.771082
Asic1	acid-sensing (proton-gated) ion channel 1 [Source:MGI Symbol;Acc:MGI:1194915]	chr15:99698795-99698899	ENSMUSG00000023017.10	chr15	99698795	99698899	+	105	0.124949	1.53069
Cd9	CD9 antigen [Source:MGI Symbol;Acc:MGI:88348]	chr6:125463685-125463759	ENSMUSG00000030342.8	chr6	125463685	125463759	-	75	0.124574	2.88576
Nrip3	nuclear receptor interacting protein 3 [Source:MGI Symbol;Acc:MGI:1925843]	chr7:109781300-109781543	ENSMUSG00000034825.14	chr7	109781300	109781543	-	244	0.124539	1.44288
Nrip3	nuclear receptor interacting protein 3 [Source:MGI Symbol;Acc:MGI:1925843]	chr7:109781300-109781545	ENSMUSG00000034825.14	chr7	109781300	109781545	-	246	0.124539	1.44288
Tspan31	tetraspanin 31 [Source:MGI Symbol;Acc:MGI:1914375]	chr10:127070115-127070261	ENSMUSG00000006736.9	chr10	127070115	127070261	-	147	0.124446	0.79213
Tspan31	tetraspanin 31 [Source:MGI Symbol;Acc:MGI:1914375]	chr10:127070115-127070256	ENSMUSG00000006736.9	chr10	127070115	127070256	-	142	0.124446	0.79213
Clcn4	chloride channel, voltage-sensitive 4 [Source:MGI Symbol;Acc:MGI:104571]	chr7:7287646-7287862	ENSMUSG00000000605.9	chr7	7287646	7287862	-	217	0.124281	2.85162
Per1	period circadian clock 1 [Source:MGI Symbol;Acc:MGI:1098283]	chr11:69103842-69103947	ENSMUSG00000020893.17	chr11	69103842	69103947	+	106	0.124019	1.73132
Ecsit	ECSIT signalling integrator [Source:MGI Symbol;Acc:MGI:1349469]	chr9:22074591-22074814	ENSMUSG00000066839.12	chr9	22074591	22074814	-	224	0.123547	2.31862
Ipo13	importin 13 [Source:MGI Symbol;Acc:MGI:2385205]	chr4:117895563-117895892	ENSMUSG00000033365.14	chr4	117895563	117895892	-	330	0.12339	1.17098
Wac	WW domain containing adaptor with coiled-coil [Source:MGI Symbol;Acc:MGI:2387357]	chr18:7869530-7869615	ENSMUSG00000024283.15	chr18	7869530	7869615	+	86	0.123334	1.50418
Psap	prosaposin [Source:MGI Symbol;Acc:MGI:97783]	chr10:60300538-60300618	ENSMUSG00000004207.14	chr10	60300538	60300618	+	81	0.123031	2.00831
Mtarc2	mitochondrial amidoxime reducing component 2 [Source:MGI Symbol;Acc:MGI:1914497]	chr1:184845546-184845808	ENSMUSG00000073481.9	chr1	184845546	184845808	-	263	0.122857	2.1598
Brsk2	BR serine/threonine kinase 2 [Source:MGI Symbol;Acc:MGI:1923020]	chr7:141998920-141999172	ENSMUSG00000053046.16	chr7	141998920	141999172	+	253	0.122833	1.29771
Fry	FRY microtubule binding protein [Source:MGI Symbol;Acc:MGI:2443895]	chr5:150400793-150400953	ENSMUSG00000056602.12	chr5	150400793	150400953	+	161	0.12281	2.03164
Ptbp2	polypyrimidine tract binding protein 2 [Source:MGI Symbol;Acc:MGI:1860489]	chr3:119726066-119726220	ENSMUSG00000028134.11	chr3	119726066	119726220	-	155	0.122806	3.24014
Pacsin2	protein kinase C and casein kinase substrate in neurons 2 [Source:MGI Symbol;Acc:MGI:1345153]	chr15:83377338-83377730	ENSMUSG00000016664.16	chr15	83377338	83377730	-	393	0.122407	1.81461
Eif4a3	eukaryotic translation initiation factor 4A3 [Source:MGI Symbol;Acc:MGI:1923731]	chr11:119297692-119297877	ENSMUSG00000025580.15	chr11	119297692	119297877	-	186	0.122318	1.22398
Naprt	nicotinate phosphoribosyltransferase [Source:MGI Symbol;Acc:MGI:2442664]	chr15:75892342-75892482	ENSMUSG00000022574.7	chr15	75892342	75892482	-	141	0.122282	1.35925
Nelfe	negative elongation factor complex member E, Rdbp [Source:MGI Symbol;Acc:MGI:102744]	chr17:34854445-34854754	ENSMUSG00000024369.16	chr17	34854445	34854754	+	310	0.122135	1.51601
Map7d2	MAP7 domain containing 2 [Source:MGI Symbol;Acc:MGI:1917474]	chrX:159496035-159496309	ENSMUSG00000041020.14	chrX	159496035	159496309	+	275	0.122124	1.84908
Uhrf1bp1l	UHRF1 (ICBP90) binding protein 1-like [Source:MGI Symbol;Acc:MGI:2442888]	chr10:89808518-89809778	ENSMUSG00000019951.10	chr10	89808518	89809778	+	1261	0.122052	1.46264
Gskip	GSK3B interacting protein [Source:MGI Symbol;Acc:MGI:1914037]	chr12:105698718-105698976	ENSMUSG00000044715.7	chr12	105698718	105698976	+	259	0.122006	2.11934
Mtarc2	mitochondrial amidoxime reducing component 2 [Source:MGI Symbol;Acc:MGI:1914497]	chr1:184845546-184845881	ENSMUSG00000073481.9	chr1	184845546	184845881	-	336	0.121994	2.2878
Nat8f1	N-acetyltransferase 8 (GCN5-related) family member 1 [Source:MGI Symbol;Acc:MGI:1913366]	chr6:85910157-85911020	ENSMUSG00000057103.11	chr6	85910157	85911020	-	864	0.121988	3.18232
Nat8f1	N-acetyltransferase 8 (GCN5-related) family member 1 [Source:MGI Symbol;Acc:MGI:1913366]	chr6:85910154-85911020	ENSMUSG00000057103.11	chr6	85910154	85911020	-	867	0.121988	3.18232
Fbxo25	F-box protein 25 [Source:MGI Symbol;Acc:MGI:1914072]	chr8:13938462-13938948	ENSMUSG00000038365.8	chr8	13938462	13938948	+	487	0.121866	0.556589
Wiz	widely-interspaced zinc finger motifs [Source:MGI Symbol;Acc:MGI:1332638]	chr17:32364182-32364463	ENSMUSG00000024050.18	chr17	32364182	32364463	-	282	0.121755	1.99845
Pcf11	PCF11 cleavage and polyadenylation factor subunit [Source:MGI Symbol;Acc:MGI:1919579]	chr7:92649456-92649575	ENSMUSG00000041328.16	chr7	92649456	92649575	-	120	0.121636	1.81727
Gpt2	glutamic pyruvate transaminase (alanine aminotransferase) 2 [Source:MGI Symbol;Acc:MGI:1915391]	chr8:85492905-85493307	ENSMUSG00000031700.11	chr8	85492905	85493307	+	403	0.121557	1.35104
Ypel3	yippee like 3 [Source:MGI Symbol;Acc:MGI:1913340]	chr7:126777771-126777874	ENSMUSG00000042675.15	chr7	126777771	126777874	+	104	0.121479	2.51338
Mtarc2	mitochondrial amidoxime reducing component 2 [Source:MGI Symbol;Acc:MGI:1914497]	chr1:184845546-184845847	ENSMUSG00000073481.9	chr1	184845546	184845847	-	302	0.121408	2.21453
Xylt2	xylosyltransferase II [Source:MGI Symbol;Acc:MGI:2444797]	chr11:94666227-94666531	ENSMUSG00000020868.15	chr11	94666227	94666531	-	305	0.121189	1.74959
Mcee	methylmalonyl CoA epimerase [Source:MGI Symbol;Acc:MGI:1920974]	chr7:64392607-64392843	ENSMUSG00000033429.10	chr7	64392607	64392843	+	237	0.121071	1.44277
Gstm7	glutathione S-transferase, mu 7 [Source:MGI Symbol;Acc:MGI:1915562]	chr3:107926810-107926980	ENSMUSG00000004035.12	chr3	107926810	107926980	-	171	0.120853	1.95278
Dhrs4	dehydrogenase/reductase (SDR family) member 4 [Source:MGI Symbol;Acc:MGI:90169]	chr14:55487584-55487718	ENSMUSG00000022210.7	chr14	55487584	55487718	+	135	0.120493	1.73622
Mpnd	MPN domain containing [Source:MGI Symbol;Acc:MGI:1915297]	chr17:56009255-56009586	ENSMUSG00000003199.16	chr17	56009255	56009586	+	332	0.120365	1.38385
Ik	IK cytokine [Source:MGI Symbol;Acc:MGI:1345142]	chr18:36753262-36753454	ENSMUSG00000024474.7	chr18	36753262	36753454	+	193	0.120193	2.12855
Dbnl	drebrin-like [Source:MGI Symbol;Acc:MGI:700006]	chr11:5799860-5800962	ENSMUSG00000020476.14	chr11	5799860	5800962	+	1103	0.120088	1.86541
Fam78b	family with sequence similarity 78, member B [Source:MGI Symbol;Acc:MGI:2443050]	chr1:167001466-167001828	ENSMUSG00000060568.14	chr1	167001466	167001828	+	363	0.120013	2.249
Exosc9	exosome component 9 [Source:MGI Symbol;Acc:MGI:1355319]	chr3:36559983-36561405	ENSMUSG00000027714.11	chr3	36559983	36561405	+	1423	0.11999	0.836542
Dpp10	dipeptidylpeptidase 10 [Source:MGI Symbol;Acc:MGI:2442409]	chr1:123341320-123341378	ENSMUSG00000036815.17	chr1	123341320	123341378	-	59	0.119919	2.57676
Ube2m	ubiquitin-conjugating enzyme E2M [Source:MGI Symbol;Acc:MGI:108278]	chr7:13037595-13037647	ENSMUSG00000005575.16	chr7	13037595	13037647	-	53	0.119891	1.92463
Dhx29	DEAH (Asp-Glu-Ala-His) box polypeptide 29 [Source:MGI Symbol;Acc:MGI:2145374]	chr13:112953674-112953814	ENSMUSG00000042426.6	chr13	112953674	112953814	+	141	0.119792	1.9938
Vars2	valyl-tRNA synthetase 2, mitochondrial [Source:MGI Symbol;Acc:MGI:1916165]	chr17:35660404-35660597	ENSMUSG00000038838.15	chr17	35660404	35660597	-	194	0.119755	1.20208
Ralyl	RALY RNA binding protein-like [Source:MGI Symbol;Acc:MGI:1924147]	chr3:13473220-13473465	ENSMUSG00000039717.16	chr3	13473220	13473465	+	246	0.119527	0.656888
C2cd2l	C2 calcium-dependent domain containing 2-like [Source:MGI Symbol;Acc:MGI:1919014]	chr9:44314155-44314455	ENSMUSG00000032120.11	chr9	44314155	44314455	-	301	0.119484	1.37869
Ndel1	nudE neurodevelopment protein 1 like 1 [Source:MGI Symbol;Acc:MGI:1932915]	chr11:68822110-68822665	ENSMUSG00000018736.14	chr11	68822110	68822665	-	556	0.119132	2.04445
Lypd3	Ly6/Plaur domain containing 3 [Source:MGI Symbol;Acc:MGI:1919684]	chr7:24640060-24641118	ENSMUSG00000057454.5	chr7	24640060	24641118	+	1059	0.118932	1.64637
Cadps	Ca2+-dependent secretion activator [Source:MGI Symbol;Acc:MGI:1350922]	chr14:12488981-12489104	ENSMUSG00000054423.14	chr14	12488981	12489104	-	124	0.118472	1.9909
Cdh13	cadherin 13 [Source:MGI Symbol;Acc:MGI:99551]	chr8:119312502-119312735	ENSMUSG00000031841.19	chr8	119312502	119312735	+	234	0.118412	2.51412
Car15	carbonic anhydrase 15 [Source:MGI Symbol;Acc:MGI:1931324]	chr16:17836718-17837393	ENSMUSG00000090236.3	chr16	17836718	17837393	-	676	0.118259	1.4137
Pcdha3	protocadherin alpha 3 [Source:MGI Symbol;Acc:MGI:2447313]	chr18:36946105-36948576	ENSMUSG00000102312.1	chr18	36946105	36948576	+	2472	0.118108	0.520984
Cdh10	cadherin 10 [Source:MGI Symbol;Acc:MGI:107436]	chr15:18818958-18819087	ENSMUSG00000022321.15	chr15	18818958	18819087	+	130	0.117957	2.13385
Pcmt1	protein-L-isoaspartate (D-aspartate) O-methyltransferase 1 [Source:MGI Symbol;Acc:MGI:97502]	chr10:7663075-7663608	ENSMUSG00000019795.17	chr10	7663075	7663608	-	534	0.11794	1.39908
Dxo	decapping exoribonuclease [Source:MGI Symbol;Acc:MGI:1890444]	chr17:34838548-34838907	ENSMUSG00000040482.16	chr17	34838548	34838907	+	360	0.117765	1.3917
Tcaim	T cell activation inhibitor, mitochondrial [Source:MGI Symbol;Acc:MGI:1196217]	chr9:122831620-122831858	ENSMUSG00000046603.16	chr9	122831620	122831858	+	239	0.11764	1.95511
Cog2	component of oligomeric golgi complex 2 [Source:MGI Symbol;Acc:MGI:1923582]	chr8:124544010-124544161	ENSMUSG00000031979.17	chr8	124544010	124544161	+	152	0.117636	1.83501
Mcee	methylmalonyl CoA epimerase [Source:MGI Symbol;Acc:MGI:1920974]	chr7:64392645-64392843	ENSMUSG00000033429.10	chr7	64392645	64392843	+	199	0.11724	1.41637
Saal1	serum amyloid A-like 1 [Source:MGI Symbol;Acc:MGI:1926185]	chr7:46699636-46701961	ENSMUSG00000006763.14	chr7	46699636	46701961	-	2326	0.117154	2.50763
Ube2m	ubiquitin-conjugating enzyme E2M [Source:MGI Symbol;Acc:MGI:108278]	chr7:13035329-13035754	ENSMUSG00000005575.16	chr7	13035329	13035754	-	426	0.116421	1.91286
Acap3	ArfGAP with coiled-coil, ankyrin repeat and PH domains 3 [Source:MGI Symbol;Acc:MGI:2153589]	chr4:155902960-155903029	ENSMUSG00000029033.16	chr4	155902960	155903029	+	70	0.116399	2.20677
Dnajc2	DnaJ heat shock protein family (Hsp40) member C2 [Source:MGI Symbol;Acc:MGI:99470]	chr5:21761541-21761725	ENSMUSG00000029014.14	chr5	21761541	21761725	-	185	0.116371	2.7674
Ncald	neurocalcin delta [Source:MGI Symbol;Acc:MGI:1196326]	chr15:37792134-37792433	ENSMUSG00000051359.15	chr15	37792134	37792433	-	300	0.116362	0.975901
Ube2m	ubiquitin-conjugating enzyme E2M [Source:MGI Symbol;Acc:MGI:108278]	chr7:13035259-13035754	ENSMUSG00000005575.16	chr7	13035259	13035754	-	496	0.116338	1.76684
Idh3g	isocitrate dehydrogenase 3 (NAD+), gamma [Source:MGI Symbol;Acc:MGI:1099463]	chrX:73780036-73780123	ENSMUSG00000002010.17	chrX	73780036	73780123	-	88	0.116111	1.97345
Xylt2	xylosyltransferase II [Source:MGI Symbol;Acc:MGI:2444797]	chr11:94666198-94666531	ENSMUSG00000020868.15	chr11	94666198	94666531	-	334	0.115739	1.48458
Mpnd	MPN domain containing [Source:MGI Symbol;Acc:MGI:1915297]	chr17:56009330-56009586	ENSMUSG00000003199.16	chr17	56009330	56009586	+	257	0.115583	1.33481
Mpnd	MPN domain containing [Source:MGI Symbol;Acc:MGI:1915297]	chr17:56009333-56009586	ENSMUSG00000003199.16	chr17	56009333	56009586	+	254	0.115583	1.33481
Jam3	junction adhesion molecule 3 [Source:MGI Symbol;Acc:MGI:1933825]	chr9:27100668-27101440	ENSMUSG00000031990.15	chr9	27100668	27101440	-	773	0.115513	1.19146
Celf3	CUGBP, Elav-like family member 3 [Source:MGI Symbol;Acc:MGI:1926034]	chr3:94489471-94490460	ENSMUSG00000028137.9	chr3	94489471	94490460	+	990	0.115427	1.08052
Rock2	Rho-associated coiled-coil containing protein kinase 2 [Source:MGI Symbol;Acc:MGI:107926]	chr12:16977889-16980320	ENSMUSG00000020580.10	chr12	16977889	16980320	+	2432	0.115274	1.10764
Prdx6	peroxiredoxin 6 [Source:MGI Symbol;Acc:MGI:894320]	chr1:161250757-161251121	ENSMUSG00000026701.15	chr1	161250757	161251121	-	365	0.115244	1.67693
Tatdn1	TatD DNase domain containing 1 [Source:MGI Symbol;Acc:MGI:1916944]	chr15:58928544-58928749	ENSMUSG00000050891.10	chr15	58928544	58928749	-	206	0.115206	1.58919
Zfp536	zinc finger protein 536 [Source:MGI Symbol;Acc:MGI:1926102]	chr7:37318024-37321100	ENSMUSG00000043456.17	chr7	37318024	37321100	-	3077	0.11518	2.27186
Mxra8	matrix-remodelling associated 8 [Source:MGI Symbol;Acc:MGI:1922011]	chr4:155841662-155842132	ENSMUSG00000029070.9	chr4	155841662	155842132	+	471	0.115064	1.76382
H3f3b	H3.3 histone B [Source:MGI Symbol;Acc:MGI:1101768]	chr11:116023882-116024473	ENSMUSG00000016559.14	chr11	116023882	116024473	-	592	0.115039	1.2814
Ube2m	ubiquitin-conjugating enzyme E2M [Source:MGI Symbol;Acc:MGI:108278]	chr7:13035238-13035754	ENSMUSG00000005575.16	chr7	13035238	13035754	-	517	0.114998	1.72812
Cyfip2	cytoplasmic FMR1 interacting protein 2 [Source:MGI Symbol;Acc:MGI:1924134]	chr11:46278059-46278155	ENSMUSG00000020340.16	chr11	46278059	46278155	-	97	0.114863	0.561088
Polr1a	polymerase (RNA) I polypeptide A [Source:MGI Symbol;Acc:MGI:1096397]	chr6:71976019-71976219	ENSMUSG00000049553.11	chr6	71976019	71976219	+	201	0.114798	2.03166
Kif1a	kinesin family member 1A [Source:MGI Symbol;Acc:MGI:108391]	chr1:93055957-93056029	ENSMUSG00000014602.15	chr1	93055957	93056029	-	73	0.114773	1.17128
Csnk2b	casein kinase 2, beta polypeptide [Source:MGI Symbol;Acc:MGI:88548]	chr17:35121794-35122053	ENSMUSG00000024387.13	chr17	35121794	35122053	-	260	0.11468	0.409483
Prdx6	peroxiredoxin 6 [Source:MGI Symbol;Acc:MGI:894320]	chr1:161250757-161251166	ENSMUSG00000026701.15	chr1	161250757	161251166	-	410	0.114193	1.7061
Secisbp2	SECIS binding protein 2 [Source:MGI Symbol;Acc:MGI:1922670]	chr13:51683278-51684044	ENSMUSG00000035139.14	chr13	51683278	51684044	+	767	0.113896	1.9131
Emc3	ER membrane protein complex subunit 3 [Source:MGI Symbol;Acc:MGI:1913337]	chr6:113520477-113520909	ENSMUSG00000030286.6	chr6	113520477	113520909	-	433	0.113742	1.58398
Pitpnm1	phosphatidylinositol transfer protein, membrane-associated 1 [Source:MGI Symbol;Acc:MGI:1197524]	chr19:4104814-4104929	ENSMUSG00000024851.14	chr19	4104814	4104929	+	116	0.113716	1.27238
Dlx6	distal-less homeobox 6 [Source:MGI Symbol;Acc:MGI:101927]	chr6:6863334-6863827	ENSMUSG00000029754.13	chr6	6863334	6863827	+	494	0.113587	1.82069
Lysmd4	LysM, putative peptidoglycan-binding, domain containing 4 [Source:MGI Symbol;Acc:MGI:1922349]	chr7:67222616-67223038	ENSMUSG00000043831.12	chr7	67222616	67223038	+	423	0.113257	0.878984
Lysmd4	LysM, putative peptidoglycan-binding, domain containing 4 [Source:MGI Symbol;Acc:MGI:1922349]	chr7:67222629-67223038	ENSMUSG00000043831.12	chr7	67222629	67223038	+	410	0.113257	0.878984
Kcnc3	potassium voltage gated channel, Shaw-related subfamily, member 3 [Source:MGI Symbol;Acc:MGI:96669]	chr7:44601869-44602141	ENSMUSG00000062785.14	chr7	44601869	44602141	+	273	0.113129	2.25602
Dbnl	drebrin-like [Source:MGI Symbol;Acc:MGI:700006]	chr11:5799860-5800629	ENSMUSG00000020476.14	chr11	5799860	5800629	+	770	0.113053	2.48633
Cipc	CLOCK interacting protein, circadian [Source:MGI Symbol;Acc:MGI:1919185]	chr12:86952744-86953165	ENSMUSG00000034157.12	chr12	86952744	86953165	+	422	0.112873	0.94159
Zfp787	zinc finger protein 787 [Source:MGI Symbol;Acc:MGI:1914359]	chr7:6142286-6142619	ENSMUSG00000046792.8	chr7	6142286	6142619	-	334	0.112848	1.45793
Cipc	CLOCK interacting protein, circadian [Source:MGI Symbol;Acc:MGI:1919185]	chr12:86952744-86953004	ENSMUSG00000034157.12	chr12	86952744	86953004	+	261	0.112623	0.954837
Ypel3	yippee like 3 [Source:MGI Symbol;Acc:MGI:1913340]	chr7:126777771-126777953	ENSMUSG00000042675.15	chr7	126777771	126777953	+	183	0.112614	2.76567
Otub1	OTU domain, ubiquitin aldehyde binding 1 [Source:MGI Symbol;Acc:MGI:2147616]	chr19:7199372-7199566	ENSMUSG00000024767.11	chr19	7199372	7199566	-	195	0.112481	1.63794
Sgtb	small glutamine-rich tetratricopeptide repeat (TPR)-containing, beta [Source:MGI Symbol;Acc:MGI:2444615]	chr13:104139740-104139798	ENSMUSG00000042743.13	chr13	104139740	104139798	+	59	0.11226	1.94158
Oaz1	ornithine decarboxylase antizyme 1 [Source:MGI Symbol;Acc:MGI:109433]	chr10:80828871-80828977	ENSMUSG00000035242.15	chr10	80828871	80828977	+	107	0.112166	3.38781
Spindoc	spindlin interactor and repressor of chromatin binding [Source:MGI Symbol;Acc:MGI:2147611]	chr19:7373657-7373854	ENSMUSG00000024970.5	chr19	7373657	7373854	-	198	0.112005	2.3369
Ccnl1	cyclin L1 [Source:MGI Symbol;Acc:MGI:1922664]	chr3:65948691-65950544	ENSMUSG00000027829.15	chr3	65948691	65950544	-	1854	0.111761	1.20101
Guk1	guanylate kinase 1 [Source:MGI Symbol;Acc:MGI:95871]	chr11:59184110-59184187	ENSMUSG00000020444.19	chr11	59184110	59184187	-	78	0.111423	1.94686
Pigt	phosphatidylinositol glycan anchor biosynthesis, class T [Source:MGI Symbol;Acc:MGI:1926178]	chr2:164502478-164503396	ENSMUSG00000017721.15	chr2	164502478	164503396	+	919	0.111132	0.964881
Eif2b5	eukaryotic translation initiation factor 2B, subunit 5 epsilon [Source:MGI Symbol;Acc:MGI:2446176]	chr16:20506128-20506235	ENSMUSG00000003235.13	chr16	20506128	20506235	+	108	0.11088	1.71423
Git1	GIT ArfGAP 1 [Source:MGI Symbol;Acc:MGI:1927140]	chr11:77506179-77506242	ENSMUSG00000011877.13	chr11	77506179	77506242	+	64	0.110591	1.07522
Scaf1	SR-related CTD-associated factor 1 [Source:MGI Symbol;Acc:MGI:2141980]	chr7:45014205-45014335	ENSMUSG00000038406.17	chr7	45014205	45014335	-	131	0.110529	1.56619
Scaf1	SR-related CTD-associated factor 1 [Source:MGI Symbol;Acc:MGI:2141980]	chr7:45014204-45014335	ENSMUSG00000038406.17	chr7	45014204	45014335	-	132	0.110529	1.56619
Aatk	apoptosis-associated tyrosine kinase [Source:MGI Symbol;Acc:MGI:1197518]	chr11:120016313-120016431	ENSMUSG00000025375.15	chr11	120016313	120016431	-	119	0.110107	0.949368
Hacd1	3-hydroxyacyl-CoA dehydratase 1 [Source:MGI Symbol;Acc:MGI:1353592]	chr2:14035779-14035957	ENSMUSG00000063275.15	chr2	14035779	14035957	-	179	0.109829	1.97284
Rpl22l1	ribosomal protein L22 like 1 [Source:MGI Symbol;Acc:MGI:1915278]	chr3:28805597-28805829	ENSMUSG00000039221.10	chr3	28805597	28805829	+	233	0.109801	1.27377
Map7	microtubule-associated protein 7 [Source:MGI Symbol;Acc:MGI:1328328]	chr10:20273779-20273880	ENSMUSG00000019996.17	chr10	20273779	20273880	+	102	0.109787	1.49015
Cyb561a3	cytochrome b561 family, member A3 [Source:MGI Symbol;Acc:MGI:2686925]	chr19:10577451-10577893	ENSMUSG00000034445.8	chr19	10577451	10577893	+	443	0.109738	1.99692
Fam3a	FAM3 metabolism regulating signaling molecule A [Source:MGI Symbol;Acc:MGI:1913544]	chrX:74392675-74393272	ENSMUSG00000031399.15	chrX	74392675	74393272	-	598	0.109718	1.81843
Lnx1	ligand of numb-protein X 1 [Source:MGI Symbol;Acc:MGI:1278335]	chr5:74619974-74620345	ENSMUSG00000029228.15	chr5	74619974	74620345	-	372	0.109678	2.33097
Cryz	crystallin, zeta [Source:MGI Symbol;Acc:MGI:88527]	chr3:154615884-154619359	ENSMUSG00000028199.18	chr3	154615884	154619359	+	3476	0.109657	1.38661
B4galnt4	beta-1,4-N-acetyl-galactosaminyl transferase 4 [Source:MGI Symbol;Acc:MGI:2652891]	chr7:141070411-141070694	ENSMUSG00000055629.5	chr7	141070411	141070694	+	284	0.109606	1.69393
Snx11	sorting nexin 11 [Source:MGI Symbol;Acc:MGI:1921729]	chr11:96772537-96772882	ENSMUSG00000020876.14	chr11	96772537	96772882	-	346	0.109462	0.903585
Apeh	acylpeptide hydrolase [Source:MGI Symbol;Acc:MGI:88041]	chr9:108087181-108087914	ENSMUSG00000032590.14	chr9	108087181	108087914	-	734	0.109298	1.7197
Tuba1a	tubulin, alpha 1A [Source:MGI Symbol;Acc:MGI:98869]	chr15:98951469-98951691	ENSMUSG00000072235.6	chr15	98951469	98951691	-	223	0.109244	1.69811
Gcn1	GCN1 activator of EIF2AK4 [Source:MGI Symbol;Acc:MGI:2444248]	chr5:115598701-115598866	ENSMUSG00000041638.18	chr5	115598701	115598866	+	166	0.109163	1.68924
Tbl3	transducin (beta)-like 3 [Source:MGI Symbol;Acc:MGI:2384863]	chr17:24705147-24705481	ENSMUSG00000040688.16	chr17	24705147	24705481	-	335	0.109052	2.56837
H2bc6	H2B clustered histone 6 [Source:MGI Symbol;Acc:MGI:2448380]	chr13:23618980-23621078	ENSMUSG00000047246.7	chr13	23618980	23621078	-	2099	0.109023	1.24395
Wdr77	WD repeat domain 77 [Source:MGI Symbol;Acc:MGI:1917715]	chr3:105967163-105967527	ENSMUSG00000000561.14	chr3	105967163	105967527	+	365	0.108649	1.94093
Dlg1	discs large MAGUK scaffold protein 1 [Source:MGI Symbol;Acc:MGI:107231]	chr16:31867831-31867922	ENSMUSG00000022770.17	chr16	31867831	31867922	+	92	0.108572	1.67261
Ccl27b	chemokine (C-C motif) ligand 27b [Source:MGI Symbol;Acc:MGI:1891389]	chr4:42655821-42655998	ENSMUSG00000096826.2	chr4	42655821	42655998	+	178	0.108543	2.29881
Txndc16	thioredoxin domain containing 16 [Source:MGI Symbol;Acc:MGI:1917811]	chr14:45208027-45211238	ENSMUSG00000021830.14	chr14	45208027	45211238	-	3212	0.108473	2.54885
Fbrs	fibrosin [Source:MGI Symbol;Acc:MGI:104648]	chr7:127489689-127489729	ENSMUSG00000042423.9	chr7	127489689	127489729	+	41	0.108413	2.30013
Atxn2l	ataxin 2-like [Source:MGI Symbol;Acc:MGI:2446242]	chr7:126493761-126493890	ENSMUSG00000032637.15	chr7	126493761	126493890	-	130	0.108291	2.39726
Ifngr1	interferon gamma receptor 1 [Source:MGI Symbol;Acc:MGI:107655]	chr10:19605919-19606420	ENSMUSG00000020009.13	chr10	19605919	19606420	+	502	0.108055	1.05613
Dctn3	dynactin 3 [Source:MGI Symbol;Acc:MGI:1859251]	chr4:41714798-41715259	ENSMUSG00000028447.11	chr4	41714798	41715259	-	462	0.108034	2.66073
Spindoc	spindlin interactor and repressor of chromatin binding [Source:MGI Symbol;Acc:MGI:2147611]	chr19:7373234-7373854	ENSMUSG00000024970.5	chr19	7373234	7373854	-	621	0.107989	2.54255
Robo1	roundabout guidance receptor 1 [Source:MGI Symbol;Acc:MGI:1274781]	chr16:73001919-73003710	ENSMUSG00000022883.11	chr16	73001919	73003710	+	1792	0.107882	1.21301
Dctn3	dynactin 3 [Source:MGI Symbol;Acc:MGI:1859251]	chr4:41714798-41715238	ENSMUSG00000028447.11	chr4	41714798	41715238	-	441	0.107678	2.66013
Zfyve27	zinc finger, FYVE domain containing 27 [Source:MGI Symbol;Acc:MGI:1919602]	chr19:42183485-42183564	ENSMUSG00000018820.13	chr19	42183485	42183564	+	80	0.107602	3.67812
Maged1	MAGE family member D1 [Source:MGI Symbol;Acc:MGI:1930187]	chrX:94537676-94537835	ENSMUSG00000025151.16	chrX	94537676	94537835	-	160	0.107474	1.3418
Ypel3	yippee like 3 [Source:MGI Symbol;Acc:MGI:1913340]	chr7:126777581-126777953	ENSMUSG00000042675.15	chr7	126777581	126777953	+	373	0.107451	3.02329
Elp2	elongator acetyltransferase complex subunit 2 [Source:MGI Symbol;Acc:MGI:1889642]	chr18:24632759-24632880	ENSMUSG00000024271.8	chr18	24632759	24632880	+	122	0.107397	2.04576
Kcnc3	potassium voltage gated channel, Shaw-related subfamily, member 3 [Source:MGI Symbol;Acc:MGI:96669]	chr7:44601869-44602104	ENSMUSG00000062785.14	chr7	44601869	44602104	+	236	0.107368	2.52049
Dnal4	dynein, axonemal, light chain 4 [Source:MGI Symbol;Acc:MGI:1859217]	chr15:79761453-79762049	ENSMUSG00000022420.16	chr15	79761453	79762049	-	597	0.107341	1.79665
Pnpla7	patatin-like phospholipase domain containing 7 [Source:MGI Symbol;Acc:MGI:2385325]	chr2:25042089-25042207	ENSMUSG00000036833.16	chr2	25042089	25042207	+	119	0.107169	1.58374
Idh3g	isocitrate dehydrogenase 3 (NAD+), gamma [Source:MGI Symbol;Acc:MGI:1099463]	chrX:73780421-73781030	ENSMUSG00000002010.17	chrX	73780421	73781030	-	610	0.107121	1.20235
Pcx	pyruvate carboxylase [Source:MGI Symbol;Acc:MGI:97520]	chr19:4620367-4620615	ENSMUSG00000024892.17	chr19	4620367	4620615	+	249	0.106991	2.40053
Srrd	SRR1 domain containing [Source:MGI Symbol;Acc:MGI:1917368]	chr5:112337909-112338472	ENSMUSG00000029346.12	chr5	112337909	112338472	-	564	0.106711	1.37216
Atp11a	ATPase, class VI, type 11A [Source:MGI Symbol;Acc:MGI:1354735]	chr8:12820390-12820518	ENSMUSG00000031441.15	chr8	12820390	12820518	+	129	0.106602	1.34143
Rsu1	Ras suppressor protein 1 [Source:MGI Symbol;Acc:MGI:103040]	chr2:13167473-13170130	ENSMUSG00000026727.10	chr2	13167473	13170130	-	2658	0.106433	1.44802
H3f3b	H3.3 histone B [Source:MGI Symbol;Acc:MGI:1101768]	chr11:116024379-116024718	ENSMUSG00000016559.14	chr11	116024379	116024718	-	340	0.106244	0.726492
Snrpb	small nuclear ribonucleoprotein B [Source:MGI Symbol;Acc:MGI:98342]	chr2:130176629-130176752	ENSMUSG00000027404.15	chr2	130176629	130176752	-	124	0.106106	0.908212
Snrpb	small nuclear ribonucleoprotein B [Source:MGI Symbol;Acc:MGI:98342]	chr2:130176629-130176750	ENSMUSG00000027404.15	chr2	130176629	130176750	-	122	0.106106	0.908212
Slc35c2	solute carrier family 35, member C2 [Source:MGI Symbol;Acc:MGI:2385166]	chr2:165277452-165277841	ENSMUSG00000017664.16	chr2	165277452	165277841	-	390	0.105893	1.28739
Pcp4l1	Purkinje cell protein 4-like 1 [Source:MGI Symbol;Acc:MGI:1913675]	chr1:171196011-171196268	ENSMUSG00000038370.6	chr1	171196011	171196268	-	258	0.105643	1.05136
Snhg5	small nucleolar RNA host gene 5 [Source:MGI Symbol;Acc:MGI:1919905]	chr9:88521918-88522586	ENSMUSG00000097195.10	chr9	88521918	88522586	-	669	0.105467	1.93476
Rarres1	retinoic acid receptor responder (tazarotene induced) 1 [Source:MGI Symbol;Acc:MGI:1924461]	chr3:67478972-67479486	ENSMUSG00000049404.7	chr3	67478972	67479486	-	515	0.105448	1.4628
Acsl5	acyl-CoA synthetase long-chain family member 5 [Source:MGI Symbol;Acc:MGI:1919129]	chr19:55296366-55297720	ENSMUSG00000024981.6	chr19	55296366	55297720	+	1355	0.105427	1.67207
Vps26c	VPS26 endosomal protein sorting factor C [Source:MGI Symbol;Acc:MGI:1206040]	chr16:94526338-94526830	ENSMUSG00000022898.13	chr16	94526338	94526830	-	493	0.105316	0.35051
Slc4a3	solute carrier family 4 (anion exchanger), member 3 [Source:MGI Symbol;Acc:MGI:109350]	chr1:75546462-75546613	ENSMUSG00000006576.16	chr1	75546462	75546613	+	152	0.105014	0.58271
Bub3	BUB3 mitotic checkpoint protein [Source:MGI Symbol;Acc:MGI:1343463]	chr7:131570879-131571892	ENSMUSG00000066979.6	chr7	131570879	131571892	+	1014	0.104741	1.55726
Bub3	BUB3 mitotic checkpoint protein [Source:MGI Symbol;Acc:MGI:1343463]	chr7:131570879-131571895	ENSMUSG00000066979.6	chr7	131570879	131571895	+	1017	0.104741	1.55726
Serpinb6a	serine (or cysteine) peptidase inhibitor, clade B, member 6a [Source:MGI Symbol;Acc:MGI:103123]	chr13:33923624-33925429	ENSMUSG00000060147.15	chr13	33923624	33925429	-	1806	0.104585	0.952826
Dlg1	discs large MAGUK scaffold protein 1 [Source:MGI Symbol;Acc:MGI:107231]	chr16:31867482-31867922	ENSMUSG00000022770.17	chr16	31867482	31867922	+	441	0.104401	1.42277
Plpp5	phospholipid phosphatase 5 [Source:MGI Symbol;Acc:MGI:1919160]	chr8:25720212-25722097	ENSMUSG00000031570.17	chr8	25720212	25722097	+	1886	0.104188	1.23231
Trim9	tripartite motif-containing 9 [Source:MGI Symbol;Acc:MGI:2137354]	chr12:70266147-70268200	ENSMUSG00000021071.17	chr12	70266147	70268200	-	2054	0.104085	1.40122
Prelid3a	PRELI domain containing 3A [Source:MGI Symbol;Acc:MGI:2442865]	chr18:67473741-67473830	ENSMUSG00000024530.8	chr18	67473741	67473830	+	90	0.104028	1.60764
Fbxl6	F-box and leucine-rich repeat protein 6 [Source:MGI Symbol;Acc:MGI:1354705]	chr15:76536924-76537006	ENSMUSG00000022559.8	chr15	76536924	76537006	-	83	0.10385	1.54563
Rfx4	regulatory factor X, 4 (influences HLA class II expression) [Source:MGI Symbol;Acc:MGI:1918387]	chr10:84880813-84880974	ENSMUSG00000020037.15	chr10	84880813	84880974	+	162	0.103849	1.67385
Mcm3ap	minichromosome maintenance complex component 3 associated protein [Source:MGI Symbol;Acc:MGI:1930089]	chr10:76490728-76490828	ENSMUSG00000001150.7	chr10	76490728	76490828	+	101	0.103658	1.28492
Trappc6a	trafficking protein particle complex 6A [Source:MGI Symbol;Acc:MGI:1914341]	chr7:19515204-19515297	ENSMUSG00000002043.17	chr7	19515204	19515297	+	94	0.103509	1.79394
Slc30a5	solute carrier family 30 (zinc transporter), member 5 [Source:MGI Symbol;Acc:MGI:1916298]	chr13:100820550-100824549	ENSMUSG00000021629.10	chr13	100820550	100824549	-	4000	0.103397	0.729439
Prrt3	proline-rich transmembrane protein 3 [Source:MGI Symbol;Acc:MGI:2444810]	chr6:113496300-113497087	ENSMUSG00000045009.9	chr6	113496300	113497087	-	788	0.103233	0.843215
Bgn	biglycan [Source:MGI Symbol;Acc:MGI:88158]	chrX:73494599-73495933	ENSMUSG00000031375.17	chrX	73494599	73495933	+	1335	0.103196	3.19036
Mrps24	mitochondrial ribosomal protein S24 [Source:MGI Symbol;Acc:MGI:1928142]	chr11:5703983-5704732	ENSMUSG00000020477.10	chr11	5703983	5704732	-	750	0.103113	1.61719
Tmem50a	transmembrane protein 50A [Source:MGI Symbol;Acc:MGI:1919067]	chr4:134913091-134913195	ENSMUSG00000028822.11	chr4	134913091	134913195	-	105	0.102865	2.60157
Fam3a	FAM3 metabolism regulating signaling molecule A [Source:MGI Symbol;Acc:MGI:1913544]	chrX:74392675-74393103	ENSMUSG00000031399.15	chrX	74392675	74393103	-	429	0.102861	1.588
Ino80b	INO80 complex subunit B [Source:MGI Symbol;Acc:MGI:1917270]	chr6:83121765-83122364	ENSMUSG00000030034.12	chr6	83121765	83122364	-	600	0.102517	1.54705
Arhgap44	Rho GTPase activating protein 44 [Source:MGI Symbol;Acc:MGI:2144423]	chr11:65008063-65008440	ENSMUSG00000033389.16	chr11	65008063	65008440	-	378	0.102483	2.64648
Sapcd2	suppressor APC domain containing 2 [Source:MGI Symbol;Acc:MGI:1919330]	chr2:25376164-25376800	ENSMUSG00000026955.13	chr2	25376164	25376800	+	637	0.102383	2.09802
Cstf2	cleavage stimulation factor, 3 pre-RNA subunit 2 [Source:MGI Symbol;Acc:MGI:1343054]	chrX:134074126-134074273	ENSMUSG00000031256.11	chrX	134074126	134074273	+	148	0.102293	2.21427
Skiv2l	superkiller viralicidic activity 2-like (S. cerevisiae) [Source:MGI Symbol;Acc:MGI:1099835]	chr17:34841671-34841808	ENSMUSG00000040356.16	chr17	34841671	34841808	-	138	0.102292	1.90747
C2cd2l	C2 calcium-dependent domain containing 2-like [Source:MGI Symbol;Acc:MGI:1919014]	chr9:44314155-44314256	ENSMUSG00000032120.11	chr9	44314155	44314256	-	102	0.101977	1.69821
Zfp788	zinc finger protein 788 [Source:MGI Symbol;Acc:MGI:1914857]	chr7:41647483-41647617	ENSMUSG00000074165.10	chr7	41647483	41647617	+	135	0.10197	1.09703
Adprh	ADP-ribosylarginine hydrolase [Source:MGI Symbol;Acc:MGI:1098234]	chr16:38447248-38447608	ENSMUSG00000002844.9	chr16	38447248	38447608	-	361	0.101824	3.50432
Adprh	ADP-ribosylarginine hydrolase [Source:MGI Symbol;Acc:MGI:1098234]	chr16:38447252-38447608	ENSMUSG00000002844.9	chr16	38447252	38447608	-	357	0.101824	3.50432
Ccdc74a	coiled-coil domain containing 74A [Source:MGI Symbol;Acc:MGI:1919565]	chr16:17646470-17646783	ENSMUSG00000041617.10	chr16	17646470	17646783	+	314	0.101807	1.43934
Ndrg4	N-myc downstream regulated gene 4 [Source:MGI Symbol;Acc:MGI:2384590]	chr8:95677653-95677871	ENSMUSG00000036564.17	chr8	95677653	95677871	+	219	0.101776	1.09401
Ubqln1	ubiquilin 1 [Source:MGI Symbol;Acc:MGI:1860276]	chr13:58177519-58178028	ENSMUSG00000005312.15	chr13	58177519	58178028	-	510	0.101685	1.34418
Garnl3	GTPase activating RANGAP domain-like 3 [Source:MGI Symbol;Acc:MGI:2139309]	chr2:33026080-33027194	ENSMUSG00000038860.15	chr2	33026080	33027194	-	1115	0.101617	1.03104
Mrps24	mitochondrial ribosomal protein S24 [Source:MGI Symbol;Acc:MGI:1928142]	chr11:5704326-5704732	ENSMUSG00000020477.10	chr11	5704326	5704732	-	407	0.101591	1.62193
Ypel3	yippee like 3 [Source:MGI Symbol;Acc:MGI:1913340]	chr7:126777508-126777953	ENSMUSG00000042675.15	chr7	126777508	126777953	+	446	0.101572	2.19343
Pttg1	pituitary tumor-transforming gene 1 [Source:MGI Symbol;Acc:MGI:1353578]	chr11:43420264-43421265	ENSMUSG00000020415.16	chr11	43420264	43421265	-	1002	0.101521	1.50142
Ap2m1	adaptor-related protein complex 2, mu 1 subunit [Source:MGI Symbol;Acc:MGI:1298405]	chr16:20542479-20542750	ENSMUSG00000022841.15	chr16	20542479	20542750	+	272	0.100887	0.383706
Atp1b1	ATPase, Na+/K+ transporting, beta 1 polypeptide [Source:MGI Symbol;Acc:MGI:88108]	chr1:164439299-164439382	ENSMUSG00000026576.12	chr1	164439299	164439382	-	84	0.100857	1.83649
Krr1	KRR1, small subunit (SSU) processome component, homolog (yeast) [Source:MGI Symbol;Acc:MGI:1289274]	chr10:111979887-111980057	ENSMUSG00000063334.16	chr10	111979887	111980057	+	171	0.100837	1.61783
Uchl1	ubiquitin carboxy-terminal hydrolase L1 [Source:MGI Symbol;Acc:MGI:103149]	chr5:66676892-66677072	ENSMUSG00000029223.12	chr5	66676892	66677072	+	181	0.100794	2.31596
Entr1	endosome associated trafficking regulator 1 [Source:MGI Symbol;Acc:MGI:1915362]	chr2:26388916-26389165	ENSMUSG00000026927.17	chr2	26388916	26389165	-	250	0.100603	1.67184
Dbp	D site albumin promoter binding protein [Source:MGI Symbol;Acc:MGI:94866]	chr7:45708260-45708471	ENSMUSG00000059824.12	chr7	45708260	45708471	+	212	0.100392	2.04879
Ywhaz	tyrosine 3-monooxygenase/tryptophan 5-monooxygenase activation protein, zeta polypeptide [Source:MGI Symbol;Acc:MGI:109484]	chr15:36775045-36775334	ENSMUSG00000022285.17	chr15	36775045	36775334	-	290	0.100374	0.429177
Dnajc9	DnaJ heat shock protein family (Hsp40) member C9 [Source:MGI Symbol;Acc:MGI:1915326]	chr14:20385800-20385886	ENSMUSG00000021811.7	chr14	20385800	20385886	-	87	0.100342	1.71399
Ppp2r2d	protein phosphatase 2, regulatory subunit B, delta [Source:MGI Symbol;Acc:MGI:1289252]	chr7:138846079-138846515	ENSMUSG00000041769.13	chr7	138846079	138846515	+	437	0.100334	2.26279
Fkbp3	FK506 binding protein 3 [Source:MGI Symbol;Acc:MGI:1353460]	chr12:65063678-65069109	ENSMUSG00000020949.9	chr12	65063678	65069109	-	5432	0.100141	1.13573
Rpl41	ribosomal protein L41 [Source:MGI Symbol;Acc:MGI:1915195]	chr10:128548949-128549153	ENSMUSG00000093674.7	chr10	128548949	128549153	-	205	0.100054	0.301538
Cstf2	cleavage stimulation factor, 3 pre-RNA subunit 2 [Source:MGI Symbol;Acc:MGI:1343054]	chrX:134074126-134074310	ENSMUSG00000031256.11	chrX	134074126	134074310	+	185	0.100023	2.18042
Lrch4	leucine-rich repeats and calponin homology (CH) domain containing 4 [Source:MGI Symbol;Acc:MGI:1917193]	chr5:137639948-137641094	ENSMUSG00000093445.7	chr5	137639948	137641094	+	1147	0.0999995	3.6051
Rpn1	ribophorin I [Source:MGI Symbol;Acc:MGI:98084]	chr6:88099287-88099373	ENSMUSG00000030062.7	chr6	88099287	88099373	+	87	0.0999578	1.71867
Rpn1	ribophorin I [Source:MGI Symbol;Acc:MGI:98084]	chr6:88099274-88099373	ENSMUSG00000030062.7	chr6	88099274	88099373	+	100	0.0999578	1.71867
Brsk2	BR serine/threonine kinase 2 [Source:MGI Symbol;Acc:MGI:1923020]	chr7:142000842-142003276	ENSMUSG00000053046.16	chr7	142000842	142003276	+	2435	0.0999092	1.42298
Pcdhgb7	protocadherin gamma subfamily B, 7 [Source:MGI Symbol;Acc:MGI:1935199]	chr18:37751600-37754193	ENSMUSG00000104063.1	chr18	37751600	37754193	+	2594	0.0998794	1.1531
Zfp385b	zinc finger protein 385B [Source:MGI Symbol;Acc:MGI:2444734]	chr2:77411100-77412140	ENSMUSG00000027016.17	chr2	77411100	77412140	-	1041	0.0998633	1.97169
Uchl1	ubiquitin carboxy-terminal hydrolase L1 [Source:MGI Symbol;Acc:MGI:103149]	chr5:66676944-66677072	ENSMUSG00000029223.12	chr5	66676944	66677072	+	129	0.0996519	2.14992
Nip7	NIP7, nucleolar pre-rRNA processing protein [Source:MGI Symbol;Acc:MGI:1913414]	chr8:107057093-107057411	ENSMUSG00000031917.12	chr8	107057093	107057411	+	319	0.0996475	1.66249
Dnajc25	DnaJ heat shock protein family (Hsp40) member C25 [Source:MGI Symbol;Acc:MGI:1919679]	chr4:59022561-59025573	ENSMUSG00000070972.13	chr4	59022561	59025573	+	3013	0.0995215	1.78241
Thra	thyroid hormone receptor alpha [Source:MGI Symbol;Acc:MGI:98742]	chr11:98764278-98765111	ENSMUSG00000058756.13	chr11	98764278	98765111	+	834	0.0995176	0.955506
Ccdc74a	coiled-coil domain containing 74A [Source:MGI Symbol;Acc:MGI:1919565]	chr16:17646475-17646783	ENSMUSG00000041617.10	chr16	17646475	17646783	+	309	0.0995115	1.42062
Smpd2	sphingomyelin phosphodiesterase 2, neutral [Source:MGI Symbol;Acc:MGI:1278330]	chr10:41489464-41490121	ENSMUSG00000019822.12	chr10	41489464	41490121	-	658	0.0993577	1.37539
Tmem50a	transmembrane protein 50A [Source:MGI Symbol;Acc:MGI:1919067]	chr4:134913091-134913261	ENSMUSG00000028822.11	chr4	134913091	134913261	-	171	0.0993485	2.49308
Sf3a1	splicing factor 3a, subunit 1 [Source:MGI Symbol;Acc:MGI:1914715]	chr11:4180034-4182541	ENSMUSG00000002129.11	chr11	4180034	4182541	+	2508	0.0992302	1.04703
Txn2	thioredoxin 2 [Source:MGI Symbol;Acc:MGI:1929468]	chr15:77927692-77928968	ENSMUSG00000005354.16	chr15	77927692	77928968	-	1277	0.0992117	1.60404
Mxra8	matrix-remodelling associated 8 [Source:MGI Symbol;Acc:MGI:1922011]	chr4:155841662-155842130	ENSMUSG00000029070.9	chr4	155841662	155842130	+	469	0.0991715	1.63856
Fkbp15	FK506 binding protein 15 [Source:MGI Symbol;Acc:MGI:2444782]	chr4:62301210-62303257	ENSMUSG00000066151.12	chr4	62301210	62303257	-	2048	0.0989973	1.40619
Elp6	elongator acetyltransferase complex subunit 6 [Source:MGI Symbol;Acc:MGI:1919349]	chr9:110320815-110322102	ENSMUSG00000054836.12	chr9	110320815	110322102	+	1288	0.0988027	2.50188
Bcas2	BCAS2 pre-mRNA processing factor [Source:MGI Symbol;Acc:MGI:1915433]	chr3:103175619-103177419	ENSMUSG00000005687.14	chr3	103175619	103177419	+	1801	0.0983902	1.56957
Ggact	gamma-glutamylamine cyclotransferase [Source:MGI Symbol;Acc:MGI:2385008]	chr14:122891437-122891816	ENSMUSG00000041625.15	chr14	122891437	122891816	-	380	0.0983007	2.23643
Rere	arginine glutamic acid dipeptide (RE) repeats [Source:MGI Symbol;Acc:MGI:2683486]	chr4:150618406-150618552	ENSMUSG00000039852.17	chr4	150618406	150618552	+	147	0.0982405	2.23598
Scaf1	SR-related CTD-associated factor 1 [Source:MGI Symbol;Acc:MGI:2141980]	chr7:45014205-45014404	ENSMUSG00000038406.17	chr7	45014205	45014404	-	200	0.0981205	0.767395
Zc3hc1	zinc finger, C3HC type 1 [Source:MGI Symbol;Acc:MGI:1916023]	chr6:30370265-30370471	ENSMUSG00000039130.18	chr6	30370265	30370471	-	207	0.0980312	2.37567
Zc3hc1	zinc finger, C3HC type 1 [Source:MGI Symbol;Acc:MGI:1916023]	chr6:30370268-30370471	ENSMUSG00000039130.18	chr6	30370268	30370471	-	204	0.0980312	2.37567
Fam78b	family with sequence similarity 78, member B [Source:MGI Symbol;Acc:MGI:2443050]	chr1:167001580-167001828	ENSMUSG00000060568.14	chr1	167001580	167001828	+	249	0.098018	1.92735
Rnf4	ring finger protein 4 [Source:MGI Symbol;Acc:MGI:1201691]	chr5:34336289-34336541	ENSMUSG00000029110.13	chr5	34336289	34336541	+	253	0.0978052	0.90221
Neto2	neuropilin (NRP) and tolloid (TLL)-like 2 [Source:MGI Symbol;Acc:MGI:1921763]	chr8:85647716-85647944	ENSMUSG00000036902.11	chr8	85647716	85647944	-	229	0.0977102	1.24209
Ddost	dolichyl-di-phosphooligosaccharide-protein glycotransferase [Source:MGI Symbol;Acc:MGI:1194508]	chr4:138308243-138308329	ENSMUSG00000028757.4	chr4	138308243	138308329	+	87	0.0976956	1.59624
Kif5b	kinesin family member 5B [Source:MGI Symbol;Acc:MGI:1098268]	chr18:6213187-6213296	ENSMUSG00000006740.14	chr18	6213187	6213296	-	110	0.0975423	1.76526
Arhgef2	rho/rac guanine nucleotide exchange factor (GEF) 2 [Source:MGI Symbol;Acc:MGI:103264]	chr3:88643790-88644233	ENSMUSG00000028059.16	chr3	88643790	88644233	+	444	0.0974424	1.91182
Atf2	activating transcription factor 2 [Source:MGI Symbol;Acc:MGI:109349]	chr2:73826359-73828678	ENSMUSG00000027104.18	chr2	73826359	73828678	-	2320	0.0973855	0.697874
Sugp2	SURP and G patch domain containing 2 [Source:MGI Symbol;Acc:MGI:2678085]	chr8:70251614-70251868	ENSMUSG00000036054.15	chr8	70251614	70251868	+	255	0.0972962	2.01671
Srrm1	serine/arginine repetitive matrix 1 [Source:MGI Symbol;Acc:MGI:1858303]	chr4:135324819-135325280	ENSMUSG00000028809.16	chr4	135324819	135325280	-	462	0.0972311	1.83216
Phactr3	phosphatase and actin regulator 3 [Source:MGI Symbol;Acc:MGI:1921439]	chr2:178335506-178336072	ENSMUSG00000027525.18	chr2	178335506	178336072	+	567	0.0971224	2.13707
Mmp19	matrix metallopeptidase 19 [Source:MGI Symbol;Acc:MGI:1927899]	chr10:128798705-128800824	ENSMUSG00000025355.7	chr10	128798705	128800824	+	2120	0.0970684	2.22206
Nudt16l1	nudix (nucleoside diphosphate linked moiety X)-type motif 16-like 1 [Source:MGI Symbol;Acc:MGI:1914161]	chr16:4940196-4940545	ENSMUSG00000022516.10	chr16	4940196	4940545	+	350	0.0969717	2.71467
Epdr1	ependymin related protein 1 (zebrafish) [Source:MGI Symbol;Acc:MGI:2145369]	chr13:19619294-19619788	ENSMUSG00000002808.7	chr13	19619294	19619788	-	495	0.0968306	1.18826
Gusb	glucuronidase, beta [Source:MGI Symbol;Acc:MGI:95872]	chr5:129989011-129989687	ENSMUSG00000025534.17	chr5	129989011	129989687	-	677	0.0967715	1.74141
Gusb	glucuronidase, beta [Source:MGI Symbol;Acc:MGI:95872]	chr5:129989023-129989687	ENSMUSG00000025534.17	chr5	129989023	129989687	-	665	0.0967715	1.74141
Fbxl6	F-box and leucine-rich repeat protein 6 [Source:MGI Symbol;Acc:MGI:1354705]	chr15:76536893-76537006	ENSMUSG00000022559.8	chr15	76536893	76537006	-	114	0.0967426	1.41129
Rab24	RAB24, member RAS oncogene family [Source:MGI Symbol;Acc:MGI:105065]	chr13:55321538-55321945	ENSMUSG00000034789.8	chr13	55321538	55321945	-	408	0.0966722	1.46275
Atrip	ATR interacting protein [Source:MGI Symbol;Acc:MGI:1925349]	chr9:109060263-109060512	ENSMUSG00000025646.9	chr9	109060263	109060512	-	250	0.0965771	1.63107
Sulf2	sulfatase 2 [Source:MGI Symbol;Acc:MGI:1919293]	chr2:166081287-166081383	ENSMUSG00000006800.14	chr2	166081287	166081383	-	97	0.0964649	1.5676
Epdr1	ependymin related protein 1 (zebrafish) [Source:MGI Symbol;Acc:MGI:2145369]	chr13:19619294-19619804	ENSMUSG00000002808.7	chr13	19619294	19619804	-	511	0.0963723	1.17632
Tbc1d17	TBC1 domain family, member 17 [Source:MGI Symbol;Acc:MGI:2449973]	chr7:44834623-44841420	ENSMUSG00000038520.15	chr7	44834623	44841420	-	6798	0.0963505	0.993438
Atp6v1d	ATPase, H+ transporting, lysosomal V1 subunit D [Source:MGI Symbol;Acc:MGI:1921084]	chr12:78845226-78845391	ENSMUSG00000021114.9	chr12	78845226	78845391	-	166	0.0962862	1.86118
Calm2	calmodulin 2 [Source:MGI Symbol;Acc:MGI:103250]	chr17:87433412-87434055	ENSMUSG00000036438.14	chr17	87433412	87434055	-	644	0.0960145	1.3325
Chmp6	charged multivesicular body protein 6 [Source:MGI Symbol;Acc:MGI:3583942]	chr11:119918607-119919548	ENSMUSG00000025371.12	chr11	119918607	119919548	+	942	0.0956372	1.67429
Atp5g3	ATP synthase, H+ transporting, mitochondrial F0 complex, subunit C3 (subunit 9) [Source:MGI Symbol;Acc:MGI:2442035]	chr2:73909318-73909941	ENSMUSG00000018770.9	chr2	73909318	73909941	-	624	0.0955267	1.44075
Nsg1	neuron specific gene family member 1 [Source:MGI Symbol;Acc:MGI:109149]	chr5:38159116-38159405	ENSMUSG00000029126.7	chr5	38159116	38159405	-	290	0.0954537	1.15139
Nme3	NME/NM23 nucleoside diphosphate kinase 3 [Source:MGI Symbol;Acc:MGI:1930182]	chr17:24897214-24897484	ENSMUSG00000073435.10	chr17	24897214	24897484	+	271	0.0954462	2.54686
Snrpn	small nuclear ribonucleoprotein N [Source:MGI Symbol;Acc:MGI:98347]	chr7:59985831-59985983	ENSMUSG00000102252.5	chr7	59985831	59985983	-	153	0.0953581	2.04018
Atp6v1d	ATPase, H+ transporting, lysosomal V1 subunit D [Source:MGI Symbol;Acc:MGI:1921084]	chr12:78845226-78845304	ENSMUSG00000021114.9	chr12	78845226	78845304	-	79	0.0949962	1.91875
Prrt3	proline-rich transmembrane protein 3 [Source:MGI Symbol;Acc:MGI:2444810]	chr6:113496268-113497087	ENSMUSG00000045009.9	chr6	113496268	113497087	-	820	0.0948228	0.850219
Rad21	RAD21 cohesin complex component [Source:MGI Symbol;Acc:MGI:108016]	chr15:51964955-51965038	ENSMUSG00000022314.10	chr15	51964955	51965038	-	84	0.0947641	1.83308
Sft2d1	SFT2 domain containing 1 [Source:MGI Symbol;Acc:MGI:1918689]	chr17:8311122-8311285	ENSMUSG00000073468.12	chr17	8311122	8311285	+	164	0.0947523	1.84171
Prkce	protein kinase C, epsilon [Source:MGI Symbol;Acc:MGI:97599]	chr17:86495938-86496112	ENSMUSG00000045038.14	chr17	86495938	86496112	+	175	0.0947061	1.41821
Prkce	protein kinase C, epsilon [Source:MGI Symbol;Acc:MGI:97599]	chr17:86495938-86496111	ENSMUSG00000045038.14	chr17	86495938	86496111	+	174	0.0947061	1.41821
Mrpl19	mitochondrial ribosomal protein L19 [Source:MGI Symbol;Acc:MGI:1926274]	chr6:81962316-81962858	ENSMUSG00000030045.10	chr6	81962316	81962858	-	543	0.094535	1.29998
Ankle2	ankyrin repeat and LEM domain containing 2 [Source:MGI Symbol;Acc:MGI:1261856]	chr5:110254301-110255469	ENSMUSG00000029501.14	chr5	110254301	110255469	+	1169	0.0945313	1.5923
Rbfox3	RNA binding protein, fox-1 homolog (C. elegans) 3 [Source:MGI Symbol;Acc:MGI:106368]	chr11:118909304-118909550	ENSMUSG00000025576.17	chr11	118909304	118909550	-	247	0.0943111	1.33524
Rbfox3	RNA binding protein, fox-1 homolog (C. elegans) 3 [Source:MGI Symbol;Acc:MGI:106368]	chr11:118909304-118909552	ENSMUSG00000025576.17	chr11	118909304	118909552	-	249	0.0943111	1.33524
Hddc3	HD domain containing 3 [Source:MGI Symbol;Acc:MGI:1915945]	chr7:80343716-80344094	ENSMUSG00000030532.6	chr7	80343716	80344094	+	379	0.0942272	1.71252
Vezt	vezatin, adherens junctions transmembrane protein [Source:MGI Symbol;Acc:MGI:2143698]	chr10:93987093-93988761	ENSMUSG00000036099.16	chr10	93987093	93988761	-	1669	0.09413	1.27499
Ndufs8	NADH:ubiquinone oxidoreductase core subunit S8 [Source:MGI Symbol;Acc:MGI:2385079]	chr19:3912467-3912734	ENSMUSG00000059734.7	chr19	3912467	3912734	-	268	0.0941282	0.865201
Ndufs8	NADH:ubiquinone oxidoreductase core subunit S8 [Source:MGI Symbol;Acc:MGI:2385079]	chr19:3912470-3912734	ENSMUSG00000059734.7	chr19	3912470	3912734	-	265	0.0941282	0.865202
Got2	glutamatic-oxaloacetic transaminase 2, mitochondrial [Source:MGI Symbol;Acc:MGI:95792]	chr8:95886336-95888392	ENSMUSG00000031672.8	chr8	95886336	95888392	-	2057	0.0938542	0.298927
Cog4	component of oligomeric golgi complex 4 [Source:MGI Symbol;Acc:MGI:2142808]	chr8:110881731-110881895	ENSMUSG00000031753.16	chr8	110881731	110881895	+	165	0.0935388	1.57356
Scyl1	SCY1-like 1 (S. cerevisiae) [Source:MGI Symbol;Acc:MGI:1931787]	chr19:5759665-5759974	ENSMUSG00000024941.9	chr19	5759665	5759974	-	310	0.0932438	1.81919
Rgs20	regulator of G-protein signaling 20 [Source:MGI Symbol;Acc:MGI:1929866]	chr1:4909576-4910662	ENSMUSG00000002459.17	chr1	4909576	4910662	-	1087	0.0928885	1.67497
Sugp1	SURP and G patch domain containing 1 [Source:MGI Symbol;Acc:MGI:1917866]	chr8:70064837-70065198	ENSMUSG00000011306.7	chr8	70064837	70065198	+	362	0.0928405	1.93414
Prkce	protein kinase C, epsilon [Source:MGI Symbol;Acc:MGI:97599]	chr17:86495938-86496457	ENSMUSG00000045038.14	chr17	86495938	86496457	+	520	0.0926107	1.3406
Lrwd1	leucine-rich repeats and WD repeat domain containing 1 [Source:MGI Symbol;Acc:MGI:1918985]	chr5:136123692-136123788	ENSMUSG00000029703.10	chr5	136123692	136123788	-	97	0.0925704	3.98055
Tafa1	TAFA chemokine like family member 1 [Source:MGI Symbol;Acc:MGI:2443695]	chr6:96654767-96656467	ENSMUSG00000059187.12	chr6	96654767	96656467	+	1701	0.0924846	1.7009
Stau2	staufen double-stranded RNA binding protein 2 [Source:MGI Symbol;Acc:MGI:1352508]	chr1:16343571-16346011	ENSMUSG00000025920.19	chr1	16343571	16346011	-	2441	0.0924446	1.35382
Rbfox3	RNA binding protein, fox-1 homolog (C. elegans) 3 [Source:MGI Symbol;Acc:MGI:106368]	chr11:118909304-118909572	ENSMUSG00000025576.17	chr11	118909304	118909572	-	269	0.0923746	1.34388
Cfl1	cofilin 1, non-muscle [Source:MGI Symbol;Acc:MGI:101757]	chr19:5493381-5495201	ENSMUSG00000056201.8	chr19	5493381	5495201	+	1821	0.0921976	1.40402
Dennd5a	DENN/MADD domain containing 5A [Source:MGI Symbol;Acc:MGI:1201681]	chr7:109897904-109897986	ENSMUSG00000035901.14	chr7	109897904	109897986	-	83	0.0921548	1.76585
Stau2	staufen double-stranded RNA binding protein 2 [Source:MGI Symbol;Acc:MGI:1352508]	chr1:16343407-16346011	ENSMUSG00000025920.19	chr1	16343407	16346011	-	2605	0.092078	1.37763
Stau2	staufen double-stranded RNA binding protein 2 [Source:MGI Symbol;Acc:MGI:1352508]	chr1:16343486-16346011	ENSMUSG00000025920.19	chr1	16343486	16346011	-	2526	0.0920212	1.38015
Elp6	elongator acetyltransferase complex subunit 6 [Source:MGI Symbol;Acc:MGI:1919349]	chr9:110320815-110321323	ENSMUSG00000054836.12	chr9	110320815	110321323	+	509	0.0919679	2.43988
Gtpbp1	GTP binding protein 1 [Source:MGI Symbol;Acc:MGI:109443]	chr15:79720010-79720181	ENSMUSG00000042535.9	chr15	79720010	79720181	+	172	0.0919386	1.5872
Ptpn5	protein tyrosine phosphatase, non-receptor type 5 [Source:MGI Symbol;Acc:MGI:97807]	chr7:47081425-47081973	ENSMUSG00000030854.17	chr7	47081425	47081973	-	549	0.0919344	1.16591
Cirbp	cold inducible RNA binding protein [Source:MGI Symbol;Acc:MGI:893588]	chr10:80169808-80169916	ENSMUSG00000045193.13	chr10	80169808	80169916	+	109	0.0916722	2.59299
Ttc3	tetratricopeptide repeat domain 3 [Source:MGI Symbol;Acc:MGI:1276539]	chr16:94447999-94448745	ENSMUSG00000040785.19	chr16	94447999	94448745	+	747	0.0915175	1.03817
App	amyloid beta (A4) precursor protein [Source:MGI Symbol;Acc:MGI:88059]	chr16:84978064-84978285	ENSMUSG00000022892.11	chr16	84978064	84978285	-	222	0.0915044	2.22181
Anapc5	anaphase-promoting complex subunit 5 [Source:MGI Symbol;Acc:MGI:1929722]	chr5:122799339-122799730	ENSMUSG00000029472.13	chr5	122799339	122799730	-	392	0.091449	1.8671
Hddc3	HD domain containing 3 [Source:MGI Symbol;Acc:MGI:1915945]	chr7:80343716-80343956	ENSMUSG00000030532.6	chr7	80343716	80343956	+	241	0.0913546	1.92696
Hddc3	HD domain containing 3 [Source:MGI Symbol;Acc:MGI:1915945]	chr7:80343679-80343956	ENSMUSG00000030532.6	chr7	80343679	80343956	+	278	0.0913546	1.92696
Hddc3	HD domain containing 3 [Source:MGI Symbol;Acc:MGI:1915945]	chr7:80343716-80343979	ENSMUSG00000030532.6	chr7	80343716	80343979	+	264	0.0913546	1.92696
Trappc6a	trafficking protein particle complex 6A [Source:MGI Symbol;Acc:MGI:1914341]	chr7:19515204-19515318	ENSMUSG00000002043.17	chr7	19515204	19515318	+	115	0.0912291	1.79122
Plpp5	phospholipid phosphatase 5 [Source:MGI Symbol;Acc:MGI:1919160]	chr8:25720338-25720645	ENSMUSG00000031570.17	chr8	25720338	25720645	+	308	0.0909479	1.78469
Dync2i2	dynein 2 intermediate chain 2 [Source:MGI Symbol;Acc:MGI:1919070]	chr2:30032073-30032505	ENSMUSG00000039715.8	chr2	30032073	30032505	-	433	0.0905454	2.07664
Metap2	methionine aminopeptidase 2 [Source:MGI Symbol;Acc:MGI:1929701]	chr10:93858489-93861602	ENSMUSG00000036112.15	chr10	93858489	93861602	-	3114	0.090464	1.91008
Cdkn2aipnl	CDKN2A interacting protein N-terminal like [Source:MGI Symbol;Acc:MGI:1261797]	chr11:51967661-51967957	ENSMUSG00000020392.8	chr11	51967661	51967957	+	297	0.0904492	0.964323
Pradc1	protease-associated domain containing 1 [Source:MGI Symbol;Acc:MGI:1920577]	chr6:85446938-85447297	ENSMUSG00000030008.9	chr6	85446938	85447297	-	360	0.0903608	2.05552
Prpf6	pre-mRNA splicing factor 6 [Source:MGI Symbol;Acc:MGI:1922946]	chr2:181640592-181641425	ENSMUSG00000002455.14	chr2	181640592	181641425	+	834	0.0903205	0.744474
Tmem209	transmembrane protein 209 [Source:MGI Symbol;Acc:MGI:1919899]	chr6:30479053-30481137	ENSMUSG00000029782.20	chr6	30479053	30481137	-	2085	0.0900762	0.464699
Dis3	DIS3 homolog, exosome endoribonuclease and 3-5 exoribonuclease [Source:MGI Symbol;Acc:MGI:1919912]	chr14:99087734-99088908	ENSMUSG00000033166.11	chr14	99087734	99088908	-	1175	0.089446	0.983021
Pacsin2	protein kinase C and casein kinase substrate in neurons 2 [Source:MGI Symbol;Acc:MGI:1345153]	chr15:83376763-83377730	ENSMUSG00000016664.16	chr15	83376763	83377730	-	968	0.0892509	1.79473
Ppp2r5b	protein phosphatase 2, regulatory subunit B, beta [Source:MGI Symbol;Acc:MGI:2388480]	chr19:6228499-6229043	ENSMUSG00000024777.10	chr19	6228499	6229043	-	545	0.0891011	1.13361
Mtres1	mitochondrial transcription rescue factor 1 [Source:MGI Symbol;Acc:MGI:1915101]	chr10:43532676-43533157	ENSMUSG00000019797.11	chr10	43532676	43533157	-	482	0.0889071	2.2442
Ugt1a6a	UDP glucuronosyltransferase 1 family, polypeptide A6A [Source:MGI Symbol;Acc:MGI:2137698]	chr1:88215044-88217403	ENSMUSG00000054545.17	chr1	88215044	88217403	+	2360	0.0888643	1.96097
Entr1	endosome associated trafficking regulator 1 [Source:MGI Symbol;Acc:MGI:1915362]	chr2:26388916-26389267	ENSMUSG00000026927.17	chr2	26388916	26389267	-	352	0.0887709	1.00143
Smarcb1	SWI/SNF related, matrix associated, actin dependent regulator of chromatin, subfamily b, member 1 [Source:MGI Symbol;Acc:MGI:1328366]	chr10:75904384-75904574	ENSMUSG00000000902.13	chr10	75904384	75904574	-	191	0.0887175	2.35057
Pja2	praja ring finger ubiquitin ligase 2 [Source:MGI Symbol;Acc:MGI:2159342]	chr17:64287528-64287642	ENSMUSG00000024083.16	chr17	64287528	64287642	-	115	0.0885582	1.4566
Pdcd6ip	programmed cell death 6 interacting protein [Source:MGI Symbol;Acc:MGI:1333753]	chr9:113659635-113659925	ENSMUSG00000032504.15	chr9	113659635	113659925	-	291	0.0884774	0.889217
Mpnd	MPN domain containing [Source:MGI Symbol;Acc:MGI:1915297]	chr17:56014941-56015109	ENSMUSG00000003199.16	chr17	56014941	56015109	+	169	0.0881929	1.96723
Kif5b	kinesin family member 5B [Source:MGI Symbol;Acc:MGI:1098268]	chr18:6213446-6214087	ENSMUSG00000006740.14	chr18	6213446	6214087	-	642	0.0881312	2.03327
P4ha2	procollagen-proline, 2-oxoglutarate 4-dioxygenase (proline 4-hydroxylase), alpha II polypeptide [Source:MGI Symbol;Acc:MGI:894286]	chr11:54127693-54129116	ENSMUSG00000018906.14	chr11	54127693	54129116	+	1424	0.0880735	0.960914
Mpnd	MPN domain containing [Source:MGI Symbol;Acc:MGI:1915297]	chr17:56014941-56015120	ENSMUSG00000003199.16	chr17	56014941	56015120	+	180	0.0877817	1.95867
Rexo4	REX4, 3-5 exonuclease [Source:MGI Symbol;Acc:MGI:2684957]	chr2:26955495-26955684	ENSMUSG00000052406.14	chr2	26955495	26955684	-	190	0.0877045	1.15817
Dbp	D site albumin promoter binding protein [Source:MGI Symbol;Acc:MGI:94866]	chr7:45707889-45708471	ENSMUSG00000059824.12	chr7	45707889	45708471	+	583	0.0875766	1.37316
Bok	BCL2-related ovarian killer [Source:MGI Symbol;Acc:MGI:1858494]	chr1:93695037-93695469	ENSMUSG00000026278.14	chr1	93695037	93695469	+	433	0.0874962	2.2772
Tgfbr2	transforming growth factor, beta receptor II [Source:MGI Symbol;Acc:MGI:98729]	chr9:116088929-116090557	ENSMUSG00000032440.13	chr9	116088929	116090557	-	1629	0.0874841	2.20105
Zwint	ZW10 interactor [Source:MGI Symbol;Acc:MGI:1289227]	chr10:72673966-72674964	ENSMUSG00000019923.14	chr10	72673966	72674964	+	999	0.087484	1.67919
Lias	lipoic acid synthetase [Source:MGI Symbol;Acc:MGI:1934604]	chr5:65408735-65409207	ENSMUSG00000029199.11	chr5	65408735	65409207	+	473	0.0873812	1.65354
Uso1	USO1 vesicle docking factor [Source:MGI Symbol;Acc:MGI:1929095]	chr5:92187235-92187345	ENSMUSG00000029407.10	chr5	92187235	92187345	+	111	0.0873008	1.58505
Brf2	BRF2, RNA polymerase III transcription initiation factor 50kDa subunit [Source:MGI Symbol;Acc:MGI:1913903]	chr8:27127460-27128632	ENSMUSG00000031487.5	chr8	27127460	27128632	-	1173	0.0872894	1.12643
Eed	embryonic ectoderm development [Source:MGI Symbol;Acc:MGI:95286]	chr7:89955974-89956413	ENSMUSG00000030619.10	chr7	89955974	89956413	-	440	0.0872333	1.08373
Cox7b	cytochrome c oxidase subunit 7B [Source:MGI Symbol;Acc:MGI:1913392]	chrX:106019391-106019703	ENSMUSG00000031231.4	chrX	106019391	106019703	+	313	0.0871671	1.62408
Nsg1	neuron specific gene family member 1 [Source:MGI Symbol;Acc:MGI:109149]	chr5:38159299-38159405	ENSMUSG00000029126.7	chr5	38159299	38159405	-	107	0.0870819	1.05029
Ciz1	CDKN1A interacting zinc finger protein 1 [Source:MGI Symbol;Acc:MGI:1920234]	chr2:32375108-32375572	ENSMUSG00000039205.16	chr2	32375108	32375572	+	465	0.0870673	2.06914
Plpp5	phospholipid phosphatase 5 [Source:MGI Symbol;Acc:MGI:1919160]	chr8:25720351-25720645	ENSMUSG00000031570.17	chr8	25720351	25720645	+	295	0.0870639	1.33749
Lrrc51	leucine rich repeat containing 51 [Source:MGI Symbol;Acc:MGI:1916608]	chr7:101913435-101913583	ENSMUSG00000064307.13	chr7	101913435	101913583	-	149	0.0866679	1.29266
Dner	delta/notch-like EGF repeat containing [Source:MGI Symbol;Acc:MGI:2152889]	chr1:84445395-84445619	ENSMUSG00000036766.12	chr1	84445395	84445619	-	225	0.0865424	1.68793
Fubp3	far upstream element (FUSE) binding protein 3 [Source:MGI Symbol;Acc:MGI:2443699]	chr2:31611579-31611739	ENSMUSG00000026843.15	chr2	31611579	31611739	+	161	0.0865196	1.7172
Eif3d	eukaryotic translation initiation factor 3, subunit D [Source:MGI Symbol;Acc:MGI:1933181]	chr15:77959954-77960481	ENSMUSG00000016554.9	chr15	77959954	77960481	-	528	0.0864228	1.3915
Kctd10	potassium channel tetramerisation domain containing 10 [Source:MGI Symbol;Acc:MGI:2141207]	chr5:114365706-114365866	ENSMUSG00000001098.15	chr5	114365706	114365866	-	161	0.0863725	1.65946
Nme3	NME/NM23 nucleoside diphosphate kinase 3 [Source:MGI Symbol;Acc:MGI:1930182]	chr17:24897214-24897522	ENSMUSG00000073435.10	chr17	24897214	24897522	+	309	0.0863309	2.44416
Sh3rf1	SH3 domain containing ring finger 1 [Source:MGI Symbol;Acc:MGI:1913066]	chr8:61384577-61386641	ENSMUSG00000031642.9	chr8	61384577	61386641	+	2065	0.0862436	1.51117
Mpdu1	mannose-P-dolichol utilization defect 1 [Source:MGI Symbol;Acc:MGI:1346040]	chr11:69657213-69657328	ENSMUSG00000018761.14	chr11	69657213	69657328	-	116	0.0860789	4.61464
Tnrc6a	trinucleotide repeat containing 6a [Source:MGI Symbol;Acc:MGI:2385292]	chr7:123192579-123193730	ENSMUSG00000052707.8	chr7	123192579	123193730	+	1152	0.0860649	1.55648
Mpc2	mitochondrial pyruvate carrier 2 [Source:MGI Symbol;Acc:MGI:1917706]	chr1:165460637-165464651	ENSMUSG00000026568.6	chr1	165460637	165464651	+	4015	0.0858935	1.40169
Eif3d	eukaryotic translation initiation factor 3, subunit D [Source:MGI Symbol;Acc:MGI:1933181]	chr15:77959954-77960096	ENSMUSG00000016554.9	chr15	77959954	77960096	-	143	0.0858906	1.7037
Top3b	topoisomerase (DNA) III beta [Source:MGI Symbol;Acc:MGI:1333803]	chr16:16892415-16892500	ENSMUSG00000022779.16	chr16	16892415	16892500	+	86	0.0858416	2.51176
Aar2	AAR2 splicing factor homolog [Source:MGI Symbol;Acc:MGI:1915545]	chr2:156547610-156547883	ENSMUSG00000027628.10	chr2	156547610	156547883	+	274	0.0858083	1.46381
Aar2	AAR2 splicing factor homolog [Source:MGI Symbol;Acc:MGI:1915545]	chr2:156547624-156547883	ENSMUSG00000027628.10	chr2	156547624	156547883	+	260	0.0858083	1.46381
Aar2	AAR2 splicing factor homolog [Source:MGI Symbol;Acc:MGI:1915545]	chr2:156547596-156547883	ENSMUSG00000027628.10	chr2	156547596	156547883	+	288	0.0858083	1.46381
Aar2	AAR2 splicing factor homolog [Source:MGI Symbol;Acc:MGI:1915545]	chr2:156547608-156547883	ENSMUSG00000027628.10	chr2	156547608	156547883	+	276	0.0858083	1.46381
Aar2	AAR2 splicing factor homolog [Source:MGI Symbol;Acc:MGI:1915545]	chr2:156547584-156547883	ENSMUSG00000027628.10	chr2	156547584	156547883	+	300	0.0858083	1.46381
Wiz	widely-interspaced zinc finger motifs [Source:MGI Symbol;Acc:MGI:1332638]	chr17:32387573-32387759	ENSMUSG00000024050.18	chr17	32387573	32387759	-	187	0.0853383	1.03668
Ybx1	Y box protein 1 [Source:MGI Symbol;Acc:MGI:99146]	chr4:119281143-119281652	ENSMUSG00000028639.14	chr4	119281143	119281652	-	510	0.0852252	0.7201
Dpysl5	dihydropyrimidinase-like 5 [Source:MGI Symbol;Acc:MGI:1929772]	chr5:30711564-30712002	ENSMUSG00000029168.14	chr5	30711564	30712002	+	439	0.085143	0.39135
Myl12a	myosin, light chain 12A, regulatory, non-sarcomeric [Source:MGI Symbol;Acc:MGI:1914518]	chr17:70996385-70996895	ENSMUSG00000024048.15	chr17	70996385	70996895	-	511	0.0850522	1.50146
Ogdh	oxoglutarate (alpha-ketoglutarate) dehydrogenase (lipoamide) [Source:MGI Symbol;Acc:MGI:1098267]	chr11:6292172-6292513	ENSMUSG00000020456.17	chr11	6292172	6292513	+	342	0.0849414	0.210212
Elmo3	engulfment and cell motility 3 [Source:MGI Symbol;Acc:MGI:2679007]	chr8:105309665-105310760	ENSMUSG00000014791.10	chr8	105309665	105310760	+	1096	0.084808	1.15749
Nln	neurolysin (metallopeptidase M3 family) [Source:MGI Symbol;Acc:MGI:1923055]	chr13:104067524-104070243	ENSMUSG00000021710.11	chr13	104067524	104070243	-	2720	0.0847796	0.422386
Kif3c	kinesin family member 3C [Source:MGI Symbol;Acc:MGI:107979]	chr12:3402064-3402606	ENSMUSG00000020668.10	chr12	3402064	3402606	+	543	0.0847547	1.18795
Rasl11a	RAS-like, family 11, member A [Source:MGI Symbol;Acc:MGI:1916145]	chr5:146847008-146847382	ENSMUSG00000029641.8	chr5	146847008	146847382	+	375	0.0845146	2.3297
Tango2	transport and golgi organization 2 [Source:MGI Symbol;Acc:MGI:101825]	chr16:18320851-18324450	ENSMUSG00000013539.14	chr16	18320851	18324450	-	3600	0.0844541	0.427088
Brd9	bromodomain containing 9 [Source:MGI Symbol;Acc:MGI:2145317]	chr13:73945560-73946159	ENSMUSG00000057649.6	chr13	73945560	73946159	+	600	0.0844446	0.812905
Ypel3	yippee like 3 [Source:MGI Symbol;Acc:MGI:1913340]	chr7:126777001-126777953	ENSMUSG00000042675.15	chr7	126777001	126777953	+	953	0.0843001	1.28498
Sugp1	SURP and G patch domain containing 1 [Source:MGI Symbol;Acc:MGI:1917866]	chr8:70064837-70066911	ENSMUSG00000011306.7	chr8	70064837	70066911	+	2075	0.0840674	2.58978
Pkp4	plakophilin 4 [Source:MGI Symbol;Acc:MGI:109281]	chr2:59344798-59344993	ENSMUSG00000026991.20	chr2	59344798	59344993	+	196	0.0839893	2.56378
Wrap73	WD repeat containing, antisense to Trp73 [Source:MGI Symbol;Acc:MGI:1891749]	chr4:154155241-154156292	ENSMUSG00000029029.14	chr4	154155241	154156292	+	1052	0.0839553	2.15637
Arfgap2	ADP-ribosylation factor GTPase activating protein 2 [Source:MGI Symbol;Acc:MGI:1924288]	chr2:91270092-91270289	ENSMUSG00000027255.14	chr2	91270092	91270289	+	198	0.0839391	0.988634
Selenow	selenoprotein W [Source:MGI Symbol;Acc:MGI:1100878]	chr7:15917208-15917539	ENSMUSG00000041571.9	chr7	15917208	15917539	-	332	0.0838159	1.49226
Uqcr11	ubiquinol-cytochrome c reductase, complex III subunit XI [Source:MGI Symbol;Acc:MGI:1913844]	chr10:80402997-80403155	ENSMUSG00000020163.12	chr10	80402997	80403155	-	159	0.0837417	2.14142
Uqcr11	ubiquinol-cytochrome c reductase, complex III subunit XI [Source:MGI Symbol;Acc:MGI:1913844]	chr10:80402998-80403155	ENSMUSG00000020163.12	chr10	80402998	80403155	-	158	0.0837417	2.14142
Wdr74	WD repeat domain 74 [Source:MGI Symbol;Acc:MGI:2147427]	chr19:8737654-8738254	ENSMUSG00000042729.11	chr19	8737654	8738254	+	601	0.0836878	1.76083
Rcor3	REST corepressor 3 [Source:MGI Symbol;Acc:MGI:2441920]	chr1:192100907-192101155	ENSMUSG00000037395.15	chr1	192100907	192101155	-	249	0.0835951	2.26966
Ube2v1	ubiquitin-conjugating enzyme E2 variant 1 [Source:MGI Symbol;Acc:MGI:1913839]	chr2:167607638-167609247	ENSMUSG00000078923.10	chr2	167607638	167609247	-	1610	0.0835504	1.65055
Cnih2	cornichon family AMPA receptor auxiliary protein 2 [Source:MGI Symbol;Acc:MGI:1277225]	chr19:5093127-5093497	ENSMUSG00000024873.7	chr19	5093127	5093497	-	371	0.0835085	1.37067
Ube2v1	ubiquitin-conjugating enzyme E2 variant 1 [Source:MGI Symbol;Acc:MGI:1913839]	chr2:167607844-167609247	ENSMUSG00000078923.10	chr2	167607844	167609247	-	1404	0.0834036	1.60875
Men1	multiple endocrine neoplasia 1 [Source:MGI Symbol;Acc:MGI:1316736]	chr19:6337482-6337519	ENSMUSG00000024947.17	chr19	6337482	6337519	+	38	0.0832191	0.665446
Men1	multiple endocrine neoplasia 1 [Source:MGI Symbol;Acc:MGI:1316736]	chr19:6337479-6337519	ENSMUSG00000024947.17	chr19	6337479	6337519	+	41	0.0832191	0.665446
Ankrd6	ankyrin repeat domain 6 [Source:MGI Symbol;Acc:MGI:2154278]	chr4:32805740-32806627	ENSMUSG00000040183.13	chr4	32805740	32806627	-	888	0.083146	1.42376
Zfp703	zinc finger protein 703 [Source:MGI Symbol;Acc:MGI:2662729]	chr8:26977325-26977611	ENSMUSG00000085795.8	chr8	26977325	26977611	+	287	0.0830364	1.00927
Trp53i11	transformation related protein 53 inducible protein 11 [Source:MGI Symbol;Acc:MGI:2670995]	chr2:93198263-93198321	ENSMUSG00000068735.14	chr2	93198263	93198321	+	59	0.0829899	1.13014
Ctns	cystinosis, nephropathic [Source:MGI Symbol;Acc:MGI:1932872]	chr11:73187522-73187641	ENSMUSG00000005949.9	chr11	73187522	73187641	-	120	0.0829379	1.17546
Cebpa	CCAAT/enhancer binding protein (C/EBP), alpha [Source:MGI Symbol;Acc:MGI:99480]	chr7:35119293-35119771	ENSMUSG00000034957.10	chr7	35119293	35119771	+	479	0.0828963	1.52873
Trappc14	trafficking protein particle complex 14 [Source:MGI Symbol;Acc:MGI:2385896]	chr5:138260835-138261716	ENSMUSG00000036948.17	chr5	138260835	138261716	-	882	0.0828745	1.6021
Tnks2	tankyrase, TRF1-interacting ankyrin-related ADP-ribose polymerase 2 [Source:MGI Symbol;Acc:MGI:1921743]	chr19:36881677-36883081	ENSMUSG00000024811.11	chr19	36881677	36883081	+	1405	0.0826693	0.583158
Car14	carbonic anhydrase 14 [Source:MGI Symbol;Acc:MGI:1344341]	chr3:95897768-95898212	ENSMUSG00000038526.14	chr3	95897768	95898212	-	445	0.0825631	2.18195
Scyl1	SCY1-like 1 (S. cerevisiae) [Source:MGI Symbol;Acc:MGI:1931787]	chr19:5759665-5759804	ENSMUSG00000024941.9	chr19	5759665	5759804	-	140	0.082549	1.5175
Vars	valyl-tRNA synthetase [Source:MGI Symbol;Acc:MGI:90675]	chr17:35014234-35014837	ENSMUSG00000007029.16	chr17	35014234	35014837	+	604	0.0825018	2.24877
Herpud1	homocysteine-inducible, endoplasmic reticulum stress-inducible, ubiquitin-like domain member 1 [Source:MGI Symbol;Acc:MGI:1927406]	chr8:94393796-94393901	ENSMUSG00000031770.16	chr8	94393796	94393901	+	106	0.0822802	1.55983
Ciapin1	cytokine induced apoptosis inhibitor 1 [Source:MGI Symbol;Acc:MGI:1922083]	chr8:94834463-94838265	ENSMUSG00000031781.14	chr8	94834463	94838265	-	3803	0.0822793	0.246727
Zfp703	zinc finger protein 703 [Source:MGI Symbol;Acc:MGI:2662729]	chr8:26977354-26977611	ENSMUSG00000085795.8	chr8	26977354	26977611	+	258	0.0822764	1.12041
Qars	glutaminyl-tRNA synthetase [Source:MGI Symbol;Acc:MGI:1915851]	chr9:108513893-108514208	ENSMUSG00000032604.16	chr9	108513893	108514208	+	316	0.0821163	1.67405
Rnf5	ring finger protein 5 [Source:MGI Symbol;Acc:MGI:1860076]	chr17:34601314-34601988	ENSMUSG00000015478.13	chr17	34601314	34601988	-	675	0.0820596	1.49994
Setd5	SET domain containing 5 [Source:MGI Symbol;Acc:MGI:1920145]	chr6:113105917-113106319	ENSMUSG00000034269.12	chr6	113105917	113106319	+	403	0.0820126	1.26869
Snhg6	small nucleolar RNA host gene 6 [Source:MGI Symbol;Acc:MGI:1921074]	chr1:9942610-9942897	ENSMUSG00000098234.7	chr1	9942610	9942897	-	288	0.0819835	1.94625
Sec62	SEC62 homolog (S. cerevisiae) [Source:MGI Symbol;Acc:MGI:1916526]	chr3:30801060-30801541	ENSMUSG00000027706.8	chr3	30801060	30801541	+	482	0.0817301	1.03049
Psmb7	proteasome (prosome, macropain) subunit, beta type 7 [Source:MGI Symbol;Acc:MGI:107637]	chr2:38611171-38613490	ENSMUSG00000026750.6	chr2	38611171	38613490	-	2320	0.081694	0.642816
Pycr1	pyrroline-5-carboxylate reductase 1 [Source:MGI Symbol;Acc:MGI:2384795]	chr11:120639416-120640348	ENSMUSG00000025140.15	chr11	120639416	120640348	-	933	0.081525	1.8107
Herpud1	homocysteine-inducible, endoplasmic reticulum stress-inducible, ubiquitin-like domain member 1 [Source:MGI Symbol;Acc:MGI:1927406]	chr8:94393531-94393901	ENSMUSG00000031770.16	chr8	94393531	94393901	+	371	0.0814037	1.46274
Lmo1	LIM domain only 1 [Source:MGI Symbol;Acc:MGI:102812]	chr7:109138675-109138976	ENSMUSG00000036111.8	chr7	109138675	109138976	-	302	0.0810331	2.30021
Acly	ATP citrate lyase [Source:MGI Symbol;Acc:MGI:103251]	chr11:100512876-100512993	ENSMUSG00000020917.17	chr11	100512876	100512993	-	118	0.0809965	1.01989
Bcl9l	B cell CLL/lymphoma 9-like [Source:MGI Symbol;Acc:MGI:1933114]	chr9:44508696-44510422	ENSMUSG00000063382.6	chr9	44508696	44510422	+	1727	0.080699	2.34275
Bcl9l	B cell CLL/lymphoma 9-like [Source:MGI Symbol;Acc:MGI:1933114]	chr9:44508696-44510423	ENSMUSG00000063382.6	chr9	44508696	44510423	+	1728	0.0805206	2.29599
Capns1	calpain, small subunit 1 [Source:MGI Symbol;Acc:MGI:88266]	chr7:30193878-30194101	ENSMUSG00000001794.13	chr7	30193878	30194101	-	224	0.08011	0.257668
Brsk2	BR serine/threonine kinase 2 [Source:MGI Symbol;Acc:MGI:1923020]	chr7:142001441-142002757	ENSMUSG00000053046.16	chr7	142001441	142002757	+	1317	0.0799983	1.45027
Tmub1	transmembrane and ubiquitin-like domain containing 1 [Source:MGI Symbol;Acc:MGI:1923764]	chr5:24445458-24446273	ENSMUSG00000028958.15	chr5	24445458	24446273	-	816	0.0796936	1.67486
Tmub1	transmembrane and ubiquitin-like domain containing 1 [Source:MGI Symbol;Acc:MGI:1923764]	chr5:24445466-24446273	ENSMUSG00000028958.15	chr5	24445466	24446273	-	808	0.0796936	1.67486
Tmub1	transmembrane and ubiquitin-like domain containing 1 [Source:MGI Symbol;Acc:MGI:1923764]	chr5:24445477-24446289	ENSMUSG00000028958.15	chr5	24445477	24446289	-	813	0.0796936	1.67486
Bop1	block of proliferation 1 [Source:MGI Symbol;Acc:MGI:1334460]	chr15:76455496-76455597	ENSMUSG00000022557.11	chr15	76455496	76455597	-	102	0.0796933	1.36586
Bop1	block of proliferation 1 [Source:MGI Symbol;Acc:MGI:1334460]	chr15:76455493-76455597	ENSMUSG00000022557.11	chr15	76455493	76455597	-	105	0.0796933	1.36586
Lig3	ligase III, DNA, ATP-dependent [Source:MGI Symbol;Acc:MGI:109152]	chr11:82801281-82801422	ENSMUSG00000020697.16	chr11	82801281	82801422	+	142	0.0796149	1.42361
Kansl3	KAT8 regulatory NSL complex subunit 3 [Source:MGI Symbol;Acc:MGI:1918055]	chr1:36345838-36346029	ENSMUSG00000010453.12	chr1	36345838	36346029	-	192	0.0794984	1.76129
Phf1	PHD finger protein 1 [Source:MGI Symbol;Acc:MGI:98647]	chr17:26935919-26936042	ENSMUSG00000024193.8	chr17	26935919	26936042	+	124	0.0791382	1.15158
Mzt1	mitotic spindle organizing protein 1 [Source:MGI Symbol;Acc:MGI:1924039]	chr14:99035834-99036510	ENSMUSG00000033186.9	chr14	99035834	99036510	-	677	0.0789741	1.64926
Necab3	N-terminal EF-hand calcium binding protein 3 [Source:MGI Symbol;Acc:MGI:1861721]	chr2:154544399-154545167	ENSMUSG00000027489.15	chr2	154544399	154545167	-	769	0.0789667	1.52521
Sncb	synuclein, beta [Source:MGI Symbol;Acc:MGI:1889011]	chr13:54758860-54759541	ENSMUSG00000034891.13	chr13	54758860	54759541	-	682	0.0789324	2.05844
Fam171a2	family with sequence similarity 171, member A2 [Source:MGI Symbol;Acc:MGI:2448496]	chr11:102439874-102440053	ENSMUSG00000034685.4	chr11	102439874	102440053	-	180	0.0785731	0.962726
Mfsd10	major facilitator superfamily domain containing 10 [Source:MGI Symbol;Acc:MGI:1915544]	chr5:34635370-34635531	ENSMUSG00000001082.12	chr5	34635370	34635531	-	162	0.078545	0.997084
Arl8a	ADP-ribosylation factor-like 8A [Source:MGI Symbol;Acc:MGI:1915974]	chr1:135155222-135156269	ENSMUSG00000026426.10	chr1	135155222	135156269	+	1048	0.0785421	1.64563
Mus81	MUS81 structure-specific endonuclease subunit [Source:MGI Symbol;Acc:MGI:1918961]	chr19:5485488-5486114	ENSMUSG00000024906.10	chr19	5485488	5486114	-	627	0.0784953	1.21929
Isoc2a	isochorismatase domain containing 2a [Source:MGI Symbol;Acc:MGI:3609243]	chr7:4895317-4896973	ENSMUSG00000086784.2	chr7	4895317	4896973	+	1657	0.0784511	1.16219
Eef1a1	eukaryotic translation elongation factor 1 alpha 1 [Source:MGI Symbol;Acc:MGI:1096881]	chr9:78478958-78479534	ENSMUSG00000037742.14	chr9	78478958	78479534	-	577	0.0782491	1.38244
Cd2bp2	CD2 cytoplasmic tail binding protein 2 [Source:MGI Symbol;Acc:MGI:1917483]	chr7:127191660-127193930	ENSMUSG00000042502.10	chr7	127191660	127193930	-	2271	0.0782337	1.19398
Hdac1	histone deacetylase 1 [Source:MGI Symbol;Acc:MGI:108086]	chr4:129522963-129523101	ENSMUSG00000028800.15	chr4	129522963	129523101	-	139	0.0777268	1.6737
Tpgs1	tubulin polyglutamylase complex subunit 1 [Source:MGI Symbol;Acc:MGI:106618]	chr10:79675400-79676127	ENSMUSG00000020308.7	chr10	79675400	79676127	+	728	0.0775744	1.97871
Tpgs1	tubulin polyglutamylase complex subunit 1 [Source:MGI Symbol;Acc:MGI:106618]	chr10:79675400-79676126	ENSMUSG00000020308.7	chr10	79675400	79676126	+	727	0.0775744	1.97871
Chmp4b	charged multivesicular body protein 4B [Source:MGI Symbol;Acc:MGI:1922858]	chr2:154693944-154694785	ENSMUSG00000038467.15	chr2	154693944	154694785	+	842	0.0775136	1.62354
Chmp4b	charged multivesicular body protein 4B [Source:MGI Symbol;Acc:MGI:1922858]	chr2:154693944-154694780	ENSMUSG00000038467.15	chr2	154693944	154694780	+	837	0.0775136	1.62354
Phf20l1	PHD finger protein 20-like 1 [Source:MGI Symbol;Acc:MGI:2444412]	chr15:66639913-66640075	ENSMUSG00000072501.5	chr15	66639913	66640075	+	163	0.0774271	1.9437
Tmem132a	transmembrane protein 132A [Source:MGI Symbol;Acc:MGI:2147810]	chr19:10859138-10860508	ENSMUSG00000024736.15	chr19	10859138	10860508	-	1371	0.0773873	1.20755
Sapcd2	suppressor APC domain containing 2 [Source:MGI Symbol;Acc:MGI:1919330]	chr2:25375968-25376803	ENSMUSG00000026955.13	chr2	25375968	25376803	+	836	0.0771558	1.31923
Rnf14	ring finger protein 14 [Source:MGI Symbol;Acc:MGI:1929668]	chr18:38314673-38314803	ENSMUSG00000060450.14	chr18	38314673	38314803	+	131	0.0770127	1.3351
Sh3glb2	SH3-domain GRB2-like endophilin B2 [Source:MGI Symbol;Acc:MGI:2385131]	chr2:30347081-30347656	ENSMUSG00000026860.16	chr2	30347081	30347656	-	576	0.0768601	0.795921
Eml4	echinoderm microtubule associated protein like 4 [Source:MGI Symbol;Acc:MGI:1926048]	chr17:83461529-83461617	ENSMUSG00000032624.16	chr17	83461529	83461617	+	89	0.076754	1.32244
Stam	signal transducing adaptor molecule (SH3 domain and ITAM motif) 1 [Source:MGI Symbol;Acc:MGI:1329014]	chr2:14146219-14147540	ENSMUSG00000026718.17	chr2	14146219	14147540	+	1322	0.0766678	1.85383
Ppp2ca	protein phosphatase 2 (formerly 2A), catalytic subunit, alpha isoform [Source:MGI Symbol;Acc:MGI:1321159]	chr11:52119143-52119692	ENSMUSG00000020349.4	chr11	52119143	52119692	+	550	0.0766649	1.20967
Spg7	SPG7, paraplegin matrix AAA peptidase subunit [Source:MGI Symbol;Acc:MGI:2385906]	chr8:123093591-123093747	ENSMUSG00000000738.18	chr8	123093591	123093747	+	157	0.0766362	1.4594
Vbp1	von Hippel-Lindau binding protein 1 [Source:MGI Symbol;Acc:MGI:1333804]	chrX:75521363-75521755	ENSMUSG00000031197.11	chrX	75521363	75521755	+	393	0.0764888	0.807508
Mphosph6	M phase phosphoprotein 6 [Source:MGI Symbol;Acc:MGI:1915783]	chr8:117791645-117792318	ENSMUSG00000031843.2	chr8	117791645	117792318	-	674	0.0764687	1.41963
Nono	non-POU-domain-containing, octamer binding protein [Source:MGI Symbol;Acc:MGI:1855692]	chrX:101444688-101445334	ENSMUSG00000031311.17	chrX	101444688	101445334	+	647	0.0763807	0.838849
Ak6	adenylate kinase 6 [Source:MGI Symbol;Acc:MGI:5510732]	chr13:100654191-100654636	ENSMUSG00000078941.9	chr13	100654191	100654636	+	446	0.0762394	1.51711
Fkbp8	FK506 binding protein 8 [Source:MGI Symbol;Acc:MGI:1341070]	chr8:70534117-70534194	ENSMUSG00000019428.16	chr8	70534117	70534194	+	78	0.0762223	2.05332
Fkbp8	FK506 binding protein 8 [Source:MGI Symbol;Acc:MGI:1341070]	chr8:70534117-70534171	ENSMUSG00000019428.16	chr8	70534117	70534171	+	55	0.0762223	2.05332
Eif3c	eukaryotic translation initiation factor 3, subunit C [Source:MGI Symbol;Acc:MGI:1926966]	chr7:126556283-126556507	ENSMUSG00000030738.11	chr7	126556283	126556507	-	225	0.0757762	2.23739
Cbln2	cerebellin 2 precursor protein [Source:MGI Symbol;Acc:MGI:88282]	chr18:86712905-86713425	ENSMUSG00000024647.14	chr18	86712905	86713425	+	521	0.0757367	2.36398
Rpl37	ribosomal protein L37 [Source:MGI Symbol;Acc:MGI:1914531]	chr15:5116694-5117422	ENSMUSG00000041841.8	chr15	5116694	5117422	+	729	0.0756293	1.10708
Srgap2	SLIT-ROBO Rho GTPase activating protein 2 [Source:MGI Symbol;Acc:MGI:109605]	chr1:131362026-131364064	ENSMUSG00000026425.15	chr1	131362026	131364064	-	2039	0.0755913	0.670274
Nup88	nucleoporin 88 [Source:MGI Symbol;Acc:MGI:104900]	chr11:70944683-70945361	ENSMUSG00000040667.11	chr11	70944683	70945361	-	679	0.075453	1.63063
Nono	non-POU-domain-containing, octamer binding protein [Source:MGI Symbol;Acc:MGI:1855692]	chrX:101445823-101446228	ENSMUSG00000031311.17	chrX	101445823	101446228	+	406	0.0754423	0.922604
Ccdc130	coiled-coil domain containing 130 [Source:MGI Symbol;Acc:MGI:1914986]	chr8:84260396-84260685	ENSMUSG00000004994.12	chr8	84260396	84260685	-	290	0.0754218	1.14563
Tmem184c	transmembrane protein 184C [Source:MGI Symbol;Acc:MGI:2384562]	chr8:77602866-77602932	ENSMUSG00000031617.16	chr8	77602866	77602932	-	67	0.0753756	1.07054
Tmem184c	transmembrane protein 184C [Source:MGI Symbol;Acc:MGI:2384562]	chr8:77602858-77602932	ENSMUSG00000031617.16	chr8	77602858	77602932	-	75	0.0753756	1.07054
Ophn1	oligophrenin 1 [Source:MGI Symbol;Acc:MGI:2151070]	chrX:98558257-98558405	ENSMUSG00000031214.13	chrX	98558257	98558405	-	149	0.0751905	1.79894
Kctd16	potassium channel tetramerisation domain containing 16 [Source:MGI Symbol;Acc:MGI:1914659]	chr18:40258030-40259192	ENSMUSG00000051401.7	chr18	40258030	40259192	+	1163	0.07502	1.60809
Paics	phosphoribosylaminoimidazole carboxylase, phosphoribosylaminoribosylaminoimidazole, succinocarboxamide synthetase [Source:MGI Symbol;Acc:MGI:1914304]	chr5:76951348-76951668	ENSMUSG00000029247.17	chr5	76951348	76951668	+	321	0.0747552	1.47629
Sde2	SDE2 telomere maintenance homolog (S. pombe) [Source:MGI Symbol;Acc:MGI:2384788]	chr1:180861098-180861218	ENSMUSG00000038806.7	chr1	180861098	180861218	+	121	0.0746971	1.81975
Pex14	peroxisomal biogenesis factor 14 [Source:MGI Symbol;Acc:MGI:1927868]	chr4:148967524-148970635	ENSMUSG00000028975.16	chr4	148967524	148970635	-	3112	0.0746743	0.613222
Atp6v1e1	ATPase, H+ transporting, lysosomal V1 subunit E1 [Source:MGI Symbol;Acc:MGI:894326]	chr6:120795244-120795764	ENSMUSG00000019210.10	chr6	120795244	120795764	-	521	0.0746443	1.89848
Rae1	ribonucleic acid export 1 [Source:MGI Symbol;Acc:MGI:1913929]	chr2:173000124-173000250	ENSMUSG00000027509.11	chr2	173000124	173000250	+	127	0.0746103	0.859537
Atp6v1e1	ATPase, H+ transporting, lysosomal V1 subunit E1 [Source:MGI Symbol;Acc:MGI:894326]	chr6:120795254-120795764	ENSMUSG00000019210.10	chr6	120795254	120795764	-	511	0.0745867	1.89782
Atp6v1e1	ATPase, H+ transporting, lysosomal V1 subunit E1 [Source:MGI Symbol;Acc:MGI:894326]	chr6:120794305-120795764	ENSMUSG00000019210.10	chr6	120794305	120795764	-	1460	0.0745549	1.72389
Sec62	SEC62 homolog (S. cerevisiae) [Source:MGI Symbol;Acc:MGI:1916526]	chr3:30800131-30800239	ENSMUSG00000027706.8	chr3	30800131	30800239	+	109	0.0744905	2.64049
Phactr3	phosphatase and actin regulator 3 [Source:MGI Symbol;Acc:MGI:1921439]	chr2:178335506-178336491	ENSMUSG00000027525.18	chr2	178335506	178336491	+	986	0.0743148	3.48186
Mob3a	MOB kinase activator 3A [Source:MGI Symbol;Acc:MGI:3050117]	chr10:80691218-80691567	ENSMUSG00000003348.10	chr10	80691218	80691567	-	350	0.0741427	1.48692
Rusc1	RUN and SH3 domain containing 1 [Source:MGI Symbol;Acc:MGI:1919546]	chr3:89087719-89088268	ENSMUSG00000041263.14	chr3	89087719	89088268	-	550	0.0740123	1.53255
Btbd19	BTB (POZ) domain containing 19 [Source:MGI Symbol;Acc:MGI:1925861]	chr4:117119877-117120861	ENSMUSG00000073771.11	chr4	117119877	117120861	-	985	0.0739513	1.66678
Hectd1	HECT domain E3 ubiquitin protein ligase 1 [Source:MGI Symbol;Acc:MGI:2384768]	chr12:51751856-51752057	ENSMUSG00000035247.16	chr12	51751856	51752057	-	202	0.0739004	2.10945
Tmem234	transmembrane protein 234 [Source:MGI Symbol;Acc:MGI:1924049]	chr4:129607456-129608117	ENSMUSG00000028797.20	chr4	129607456	129608117	+	662	0.0738694	2.0308
Hsp90aa1	heat shock protein 90, alpha (cytosolic), class A member 1 [Source:MGI Symbol;Acc:MGI:96250]	chr12:110692709-110692872	ENSMUSG00000021270.13	chr12	110692709	110692872	-	164	0.0738265	0.55061
Akap8l	A kinase (PRKA) anchor protein 8-like [Source:MGI Symbol;Acc:MGI:1860606]	chr17:32333003-32334696	ENSMUSG00000002625.10	chr17	32333003	32334696	-	1694	0.0736695	1.34594
Ptn	pleiotrophin [Source:MGI Symbol;Acc:MGI:97804]	chr6:36739459-36741439	ENSMUSG00000029838.11	chr6	36739459	36741439	-	1981	0.0736621	0.851601
Cilk1	ciliogenesis associated kinase 1 [Source:MGI Symbol;Acc:MGI:1934157]	chr9:78167600-78170453	ENSMUSG00000009828.15	chr9	78167600	78170453	+	2854	0.073501	1.28512
Taf6	TATA-box binding protein associated factor 6 [Source:MGI Symbol;Acc:MGI:109129]	chr5:138179780-138179953	ENSMUSG00000036980.13	chr5	138179780	138179953	-	174	0.073458	1.79898
Pdcd6	programmed cell death 6 [Source:MGI Symbol;Acc:MGI:109283]	chr13:74308866-74309842	ENSMUSG00000021576.6	chr13	74308866	74309842	-	977	0.0734557	0.637262
Ngly1	N-glycanase 1 [Source:MGI Symbol;Acc:MGI:1913276]	chr14:16268541-16270957	ENSMUSG00000021785.8	chr14	16268541	16270957	+	2417	0.0734185	0.598187
Rab11a	RAB11A, member RAS oncogene family [Source:MGI Symbol;Acc:MGI:1858202]	chr9:64716503-64716988	ENSMUSG00000004771.12	chr9	64716503	64716988	-	486	0.0729337	1.41379
Fabp3	fatty acid binding protein 3, muscle and heart [Source:MGI Symbol;Acc:MGI:95476]	chr4:130315172-130315463	ENSMUSG00000028773.8	chr4	130315172	130315463	+	292	0.0729161	1.64891
Abt1	activator of basal transcription 1 [Source:MGI Symbol;Acc:MGI:1353636]	chr13:23418361-23422335	ENSMUSG00000036376.3	chr13	23418361	23422335	-	3975	0.0728757	1.57511
Lias	lipoic acid synthetase [Source:MGI Symbol;Acc:MGI:1934604]	chr5:65408735-65410693	ENSMUSG00000029199.11	chr5	65408735	65410693	+	1959	0.0728568	1.09061
Agfg1	ArfGAP with FG repeats 1 [Source:MGI Symbol;Acc:MGI:1333754]	chr1:82876171-82876324	ENSMUSG00000026159.13	chr1	82876171	82876324	+	154	0.0727208	1.53572
Phactr3	phosphatase and actin regulator 3 [Source:MGI Symbol;Acc:MGI:1921439]	chr2:178335506-178338492	ENSMUSG00000027525.18	chr2	178335506	178338492	+	2987	0.0727192	3.66011
Metap1	methionyl aminopeptidase 1 [Source:MGI Symbol;Acc:MGI:1922874]	chr3:138459681-138460500	ENSMUSG00000005813.12	chr3	138459681	138460500	-	820	0.0726729	1.71979
Ppp6r3	protein phosphatase 6, regulatory subunit 3 [Source:MGI Symbol;Acc:MGI:1921807]	chr19:3459361-3459480	ENSMUSG00000024908.15	chr19	3459361	3459480	-	120	0.0725296	2.00554
Ddx50	DExD box helicase 50 [Source:MGI Symbol;Acc:MGI:2182303]	chr10:62648493-62651173	ENSMUSG00000020076.7	chr10	62648493	62651173	-	2681	0.0723017	1.02938
Tnk2	tyrosine kinase, non-receptor, 2 [Source:MGI Symbol;Acc:MGI:1858308]	chr16:32679459-32680807	ENSMUSG00000022791.19	chr16	32679459	32680807	+	1349	0.0722465	1.99008
Mapre1	microtubule-associated protein, RP/EB family, member 1 [Source:MGI Symbol;Acc:MGI:891995]	chr2:153757925-153758084	ENSMUSG00000027479.14	chr2	153757925	153758084	+	160	0.0718264	2.41181
Wdr17	WD repeat domain 17 [Source:MGI Symbol;Acc:MGI:1924662]	chr8:54665055-54665130	ENSMUSG00000039375.16	chr8	54665055	54665130	-	76	0.0717004	1.3757
Lamb2	laminin, beta 2 [Source:MGI Symbol;Acc:MGI:99916]	chr9:108484246-108484373	ENSMUSG00000052911.9	chr9	108484246	108484373	+	128	0.0716083	1.41252
Cep192	centrosomal protein 192 [Source:MGI Symbol;Acc:MGI:1918049]	chr18:67870327-67870926	ENSMUSG00000024542.9	chr18	67870327	67870926	+	600	0.0715889	1.16251
Lmo1	LIM domain only 1 [Source:MGI Symbol;Acc:MGI:102812]	chr7:109138572-109138976	ENSMUSG00000036111.8	chr7	109138572	109138976	-	405	0.071476	1.46862
Tomm40	translocase of outer mitochondrial membrane 40 [Source:MGI Symbol;Acc:MGI:1858259]	chr7:19711414-19713761	ENSMUSG00000002984.17	chr7	19711414	19713761	-	2348	0.0713544	0.487799
Ebna1bp2	EBNA1 binding protein 2 [Source:MGI Symbol;Acc:MGI:1916322]	chr4:118621082-118621662	ENSMUSG00000028729.15	chr4	118621082	118621662	+	581	0.0711577	0.94138
Cd81	CD81 antigen [Source:MGI Symbol;Acc:MGI:1096398]	chr7:143067312-143067605	ENSMUSG00000037706.17	chr7	143067312	143067605	+	294	0.0711445	2.30098
Mpdu1	mannose-P-dolichol utilization defect 1 [Source:MGI Symbol;Acc:MGI:1346040]	chr11:69658347-69658698	ENSMUSG00000018761.14	chr11	69658347	69658698	-	352	0.0710854	1.08351
Cs	citrate synthase [Source:MGI Symbol;Acc:MGI:88529]	chr10:128337810-128340812	ENSMUSG00000005683.8	chr10	128337810	128340812	+	3003	0.0709224	0.349712
Timm22	translocase of inner mitochondrial membrane 22 [Source:MGI Symbol;Acc:MGI:1929742]	chr11:76414046-76414329	ENSMUSG00000020843.15	chr11	76414046	76414329	+	284	0.0707675	1.9567
Ubxn2b	UBX domain protein 2B [Source:MGI Symbol;Acc:MGI:1915303]	chr4:6215912-6221688	ENSMUSG00000028243.5	chr4	6215912	6221688	+	5777	0.07061	1.84616
Tsg101	tumor susceptibility gene 101 [Source:MGI Symbol;Acc:MGI:106581]	chr7:46888949-46889704	ENSMUSG00000014402.15	chr7	46888949	46889704	-	756	0.0706018	1.23902
Dlg5	discs large MAGUK scaffold protein 5 [Source:MGI Symbol;Acc:MGI:1918478]	chr14:24148208-24148764	ENSMUSG00000021782.14	chr14	24148208	24148764	-	557	0.0705018	0.94266
Rfng	RFNG O-fucosylpeptide 3-beta-N-acetylglucosaminyltransferase [Source:MGI Symbol;Acc:MGI:894275]	chr11:120782629-120782717	ENSMUSG00000025158.7	chr11	120782629	120782717	-	89	0.0704861	0.876129
Ak6	adenylate kinase 6 [Source:MGI Symbol;Acc:MGI:5510732]	chr13:100654191-100654558	ENSMUSG00000078941.9	chr13	100654191	100654558	+	368	0.0704456	1.14458
Mrto4	mRNA turnover 4, ribosome maturation factor [Source:MGI Symbol;Acc:MGI:1917152]	chr4:139348162-139348749	ENSMUSG00000028741.13	chr4	139348162	139348749	-	588	0.0704148	1.31672
Ckmt1	creatine kinase, mitochondrial 1, ubiquitous [Source:MGI Symbol;Acc:MGI:99441]	chr2:121359486-121359777	ENSMUSG00000000308.14	chr2	121359486	121359777	+	292	0.0702717	1.33366
Zbtb17	zinc finger and BTB domain containing 17 [Source:MGI Symbol;Acc:MGI:107410]	chr4:141466348-141466557	ENSMUSG00000006215.12	chr4	141466348	141466557	+	210	0.0702439	1.16383
Esf1	ESF1 nucleolar pre-rRNA processing protein homolog [Source:MGI Symbol;Acc:MGI:1913830]	chr2:140159363-140159794	ENSMUSG00000045624.15	chr2	140159363	140159794	-	432	0.0701208	0.917708
Zmym1	zinc finger, MYM domain containing 1 [Source:MGI Symbol;Acc:MGI:1915560]	chr4:127048665-127049906	ENSMUSG00000043872.14	chr4	127048665	127049906	-	1242	0.070061	1.42804
Tmem101	transmembrane protein 101 [Source:MGI Symbol;Acc:MGI:1923797]	chr11:102154174-102154703	ENSMUSG00000020921.6	chr11	102154174	102154703	-	530	0.0700318	1.03487
Kdm1a	lysine (K)-specific demethylase 1A [Source:MGI Symbol;Acc:MGI:1196256]	chr4:136551872-136552542	ENSMUSG00000036940.15	chr4	136551872	136552542	-	671	0.0700162	1.61267
Sbno2	strawberry notch 2 [Source:MGI Symbol;Acc:MGI:2448490]	chr10:80066831-80067394	ENSMUSG00000035673.10	chr10	80066831	80067394	-	564	0.0698519	0.675099
Ckmt1	creatine kinase, mitochondrial 1, ubiquitous [Source:MGI Symbol;Acc:MGI:99441]	chr2:121359316-121359777	ENSMUSG00000000308.14	chr2	121359316	121359777	+	462	0.0698226	1.34059
Vstm2l	V-set and transmembrane domain containing 2-like [Source:MGI Symbol;Acc:MGI:2685537]	chr2:157943857-157944719	ENSMUSG00000037843.6	chr2	157943857	157944719	+	863	0.0697716	2.87879
Scamp1	secretory carrier membrane protein 1 [Source:MGI Symbol;Acc:MGI:1349480]	chr13:94224895-94225054	ENSMUSG00000021687.14	chr13	94224895	94225054	-	160	0.0695045	0.591177
Mapre1	microtubule-associated protein, RP/EB family, member 1 [Source:MGI Symbol;Acc:MGI:891995]	chr2:153757925-153758132	ENSMUSG00000027479.14	chr2	153757925	153758132	+	208	0.0694038	2.74544
Ndufv1	NADH:ubiquinone oxidoreductase core subunit V1 [Source:MGI Symbol;Acc:MGI:107851]	chr19:4009344-4009847	ENSMUSG00000037916.14	chr19	4009344	4009847	-	504	0.0694022	1.15551
Dvl2	dishevelled segment polarity protein 2 [Source:MGI Symbol;Acc:MGI:106613]	chr11:70006514-70006961	ENSMUSG00000020888.16	chr11	70006514	70006961	+	448	0.0693698	1.21528
D8Ertd738e	DNA segment, Chr 8, ERATO Doi 738, expressed [Source:MGI Symbol;Acc:MGI:1289231]	chr8:84246238-84246693	ENSMUSG00000019362.8	chr8	84246238	84246693	-	456	0.0692296	1.22882
Tmem120a	transmembrane protein 120A [Source:MGI Symbol;Acc:MGI:2686991]	chr5:135735485-135735805	ENSMUSG00000039886.8	chr5	135735485	135735805	-	321	0.0692276	1.10051
Tmem120a	transmembrane protein 120A [Source:MGI Symbol;Acc:MGI:2686991]	chr5:135735504-135735805	ENSMUSG00000039886.8	chr5	135735504	135735805	-	302	0.0692276	1.10051
Napa	N-ethylmaleimide sensitive fusion protein attachment protein alpha [Source:MGI Symbol;Acc:MGI:104563]	chr7:16115104-16115271	ENSMUSG00000006024.13	chr7	16115104	16115271	+	168	0.0690003	1.05542
S100a16	S100 calcium binding protein A16 [Source:MGI Symbol;Acc:MGI:1915110]	chr3:90542365-90543014	ENSMUSG00000074457.10	chr3	90542365	90543014	+	650	0.0689929	1.84404
Elavl4	ELAV like RNA binding protein 4 [Source:MGI Symbol;Acc:MGI:107427]	chr4:110206359-110206659	ENSMUSG00000028546.17	chr4	110206359	110206659	-	301	0.0688912	1.84803
Lmna	lamin A [Source:MGI Symbol;Acc:MGI:96794]	chr3:88480147-88483413	ENSMUSG00000028063.15	chr3	88480147	88483413	-	3267	0.068653	0.834745
Eif3e	eukaryotic translation initiation factor 3, subunit E [Source:MGI Symbol;Acc:MGI:99257]	chr15:43261692-43263335	ENSMUSG00000022336.3	chr15	43261692	43263335	-	1644	0.0685433	1.16634
Mark3	MAP/microtubule affinity regulating kinase 3 [Source:MGI Symbol;Acc:MGI:1341865]	chr12:111588150-111592768	ENSMUSG00000007411.16	chr12	111588150	111592768	+	4619	0.0685397	0.284837
Mt3	metallothionein 3 [Source:MGI Symbol;Acc:MGI:97173]	chr8:94153697-94153985	ENSMUSG00000031760.9	chr8	94153697	94153985	+	289	0.0684687	1.49852
Elk1	ELK1, member of ETS oncogene family [Source:MGI Symbol;Acc:MGI:101833]	chrX:20939721-20941797	ENSMUSG00000009406.13	chrX	20939721	20941797	-	2077	0.068253	0.512205
Anapc5	anaphase-promoting complex subunit 5 [Source:MGI Symbol;Acc:MGI:1929722]	chr5:122799339-122799474	ENSMUSG00000029472.13	chr5	122799339	122799474	-	136	0.0682095	1.82676
Pml	promyelocytic leukemia [Source:MGI Symbol;Acc:MGI:104662]	chr9:58219751-58220057	ENSMUSG00000036986.16	chr9	58219751	58220057	-	307	0.0682021	1.32828
Ndufs5	NADH:ubiquinone oxidoreductase core subunit S5 [Source:MGI Symbol;Acc:MGI:1890889]	chr4:123715864-123716081	ENSMUSG00000028648.13	chr4	123715864	123716081	-	218	0.0681363	1.50509
S100a16	S100 calcium binding protein A16 [Source:MGI Symbol;Acc:MGI:1915110]	chr3:90542365-90542927	ENSMUSG00000074457.10	chr3	90542365	90542927	+	563	0.0681007	1.81694
Leng8	leukocyte receptor cluster (LRC) member 8 [Source:MGI Symbol;Acc:MGI:2142195]	chr7:4145266-4145473	ENSMUSG00000035545.13	chr7	4145266	4145473	+	208	0.0680723	1.19417
Tsg101	tumor susceptibility gene 101 [Source:MGI Symbol;Acc:MGI:106581]	chr7:46889027-46889704	ENSMUSG00000014402.15	chr7	46889027	46889704	-	678	0.0680282	1.20959
Rps6kl1	ribosomal protein S6 kinase-like 1 [Source:MGI Symbol;Acc:MGI:2443413]	chr12:85135249-85136483	ENSMUSG00000019235.9	chr12	85135249	85136483	-	1235	0.0679552	1.11807
Lamtor1	late endosomal/lysosomal adaptor, MAPK and MTOR activator 1 [Source:MGI Symbol;Acc:MGI:1913758]	chr7:101911273-101911903	ENSMUSG00000030842.12	chr7	101911273	101911903	+	631	0.0677467	2.09087
Klc1	kinesin light chain 1 [Source:MGI Symbol;Acc:MGI:107978]	chr12:111806315-111806775	ENSMUSG00000021288.19	chr12	111806315	111806775	+	461	0.0675705	0.368552
Synj1	synaptojanin 1 [Source:MGI Symbol;Acc:MGI:1354961]	chr16:90938657-90939034	ENSMUSG00000022973.18	chr16	90938657	90939034	-	378	0.0675406	1.48292
Rnf166	ring finger protein 166 [Source:MGI Symbol;Acc:MGI:1915968]	chr8:122470200-122470356	ENSMUSG00000014470.4	chr8	122470200	122470356	-	157	0.0673818	1.70928
Cotl1	coactosin-like 1 (Dictyostelium) [Source:MGI Symbol;Acc:MGI:1919292]	chr8:119809225-119810049	ENSMUSG00000031827.13	chr8	119809225	119810049	-	825	0.0672343	1.17653
Dll4	delta like canonical Notch ligand 4 [Source:MGI Symbol;Acc:MGI:1859388]	chr2:119332143-119332845	ENSMUSG00000027314.6	chr2	119332143	119332845	+	703	0.0671958	1.26192
Bmp2k	BMP2 inducible kinase [Source:MGI Symbol;Acc:MGI:2155456]	chr5:97086743-97091867	ENSMUSG00000034663.13	chr5	97086743	97091867	+	5125	0.0671148	1.20497
Mau2	MAU2 sister chromatid cohesion factor [Source:MGI Symbol;Acc:MGI:1921799]	chr8:70032064-70034514	ENSMUSG00000031858.16	chr8	70032064	70034514	-	2451	0.0671139	0.492384
Mfsd10	major facilitator superfamily domain containing 10 [Source:MGI Symbol;Acc:MGI:1915544]	chr5:34635370-34635525	ENSMUSG00000001082.12	chr5	34635370	34635525	-	156	0.0670316	0.882308
Srebf1	sterol regulatory element binding transcription factor 1 [Source:MGI Symbol;Acc:MGI:107606]	chr11:60202659-60203265	ENSMUSG00000020538.15	chr11	60202659	60203265	-	607	0.066888	1.25597
Scube1	signal peptide, CUB domain, EGF-like 1 [Source:MGI Symbol;Acc:MGI:1890616]	chr15:83604999-83607477	ENSMUSG00000016763.15	chr15	83604999	83607477	-	2479	0.0668492	1.15086
Nthl1	nth (endonuclease III)-like 1 (E.coli) [Source:MGI Symbol;Acc:MGI:1313275]	chr17:24634725-24635280	ENSMUSG00000041429.3	chr17	24634725	24635280	+	556	0.06684	1.41454
Scube1	signal peptide, CUB domain, EGF-like 1 [Source:MGI Symbol;Acc:MGI:1890616]	chr15:83605003-83607477	ENSMUSG00000016763.15	chr15	83605003	83607477	-	2475	0.0668195	1.17124
Ralgps2	Ral GEF with PH domain and SH3 binding motif 2 [Source:MGI Symbol;Acc:MGI:1925505]	chr1:156808830-156809193	ENSMUSG00000026594.14	chr1	156808830	156809193	-	364	0.0668185	1.60668
Pithd1	PITH (C-terminal proteasome-interacting domain of thioredoxin-like) domain containing 1 [Source:MGI Symbol;Acc:MGI:1913443]	chr4:135976066-135976496	ENSMUSG00000028669.15	chr4	135976066	135976496	-	431	0.0668127	1.58705
Podn	podocan [Source:MGI Symbol;Acc:MGI:2674939]	chr4:108017723-108017904	ENSMUSG00000028600.15	chr4	108017723	108017904	-	182	0.0666829	1.98437
Rab21	RAB21, member RAS oncogene family [Source:MGI Symbol;Acc:MGI:894308]	chr10:115314752-115315594	ENSMUSG00000020132.10	chr10	115314752	115315594	-	843	0.0666666	1.00458
Prpf3	pre-mRNA processing factor 3 [Source:MGI Symbol;Acc:MGI:1918017]	chr3:95848915-95849574	ENSMUSG00000015748.13	chr3	95848915	95849574	-	660	0.0666247	1.0429
Kctd13	potassium channel tetramerisation domain containing 13 [Source:MGI Symbol;Acc:MGI:1923739]	chr7:126944885-126945631	ENSMUSG00000030685.5	chr7	126944885	126945631	+	747	0.0666246	1.23889
Cables1	CDK5 and Abl enzyme substrate 1 [Source:MGI Symbol;Acc:MGI:1927065]	chr18:11839220-11840533	ENSMUSG00000040957.15	chr18	11839220	11840533	+	1314	0.0665943	0.967772
Pgap6	post-glycosylphosphatidylinositol attachment to proteins 6 [Source:MGI Symbol;Acc:MGI:1926283]	chr17:26117739-26118007	ENSMUSG00000024180.14	chr17	26117739	26118007	+	269	0.0663813	1.11896
Pdcd6ip	programmed cell death 6 interacting protein [Source:MGI Symbol;Acc:MGI:1333753]	chr9:113659831-113659925	ENSMUSG00000032504.15	chr9	113659831	113659925	-	95	0.066168	1.05846
Smim15	small integral membrane protein 15 [Source:MGI Symbol;Acc:MGI:1922866]	chr13:108047440-108048239	ENSMUSG00000071180.5	chr13	108047440	108048239	+	800	0.0660982	1.21891
Hpca	hippocalcin [Source:MGI Symbol;Acc:MGI:1336200]	chr4:129111576-129112525	ENSMUSG00000028785.13	chr4	129111576	129112525	-	950	0.0660494	1.33312
Zfp853	zinc finger protein 853 [Source:MGI Symbol;Acc:MGI:2685638]	chr5:143287755-143289077	ENSMUSG00000093910.2	chr5	143287755	143289077	-	1323	0.0660118	2.19304
Hpca	hippocalcin [Source:MGI Symbol;Acc:MGI:1336200]	chr4:129111570-129112525	ENSMUSG00000028785.13	chr4	129111570	129112525	-	956	0.0659586	1.33097
Ipo13	importin 13 [Source:MGI Symbol;Acc:MGI:2385205]	chr4:117895563-117895873	ENSMUSG00000033365.14	chr4	117895563	117895873	-	311	0.0657828	0.694208
Gabarapl2	gamma-aminobutyric acid (GABA) A receptor-associated protein-like 2 [Source:MGI Symbol;Acc:MGI:1890602]	chr8:111940758-111940852	ENSMUSG00000031950.7	chr8	111940758	111940852	+	95	0.0656786	0.221561
Dhrs11	dehydrogenase/reductase (SDR family) member 11 [Source:MGI Symbol;Acc:MGI:2652816]	chr11:84820856-84821301	ENSMUSG00000034449.7	chr11	84820856	84821301	-	446	0.0655274	1.30671
Calm2	calmodulin 2 [Source:MGI Symbol;Acc:MGI:103250]	chr17:87435791-87435934	ENSMUSG00000036438.14	chr17	87435791	87435934	-	144	0.0655	1.40512
Chrd	chordin [Source:MGI Symbol;Acc:MGI:1313268]	chr16:20733465-20733634	ENSMUSG00000006958.14	chr16	20733465	20733634	+	170	0.0654392	0.781118
Plcb4	phospholipase C, beta 4 [Source:MGI Symbol;Acc:MGI:107464]	chr2:135983029-135983126	ENSMUSG00000039943.16	chr2	135983029	135983126	+	98	0.0651603	1.56353
Ssna1	SS nuclear autoantigen 1 [Source:MGI Symbol;Acc:MGI:1915725]	chr2:25271039-25271581	ENSMUSG00000026966.6	chr2	25271039	25271581	-	543	0.0651331	1.46344
Tpst2	protein-tyrosine sulfotransferase 2 [Source:MGI Symbol;Acc:MGI:1309516]	chr5:112314891-112315355	ENSMUSG00000029344.15	chr5	112314891	112315355	+	465	0.0650553	1.35004
Tpst2	protein-tyrosine sulfotransferase 2 [Source:MGI Symbol;Acc:MGI:1309516]	chr5:112314891-112315361	ENSMUSG00000029344.15	chr5	112314891	112315361	+	471	0.0650553	1.35004
Rd3	retinal degeneration 3 [Source:MGI Symbol;Acc:MGI:1921273]	chr1:191985212-191988283	ENSMUSG00000049353.17	chr1	191985212	191988283	+	3072	0.0646947	1.26761
Tmem181a	transmembrane protein 181A [Source:MGI Symbol;Acc:MGI:1924356]	chr17:6305369-6305764	ENSMUSG00000038141.11	chr17	6305369	6305764	+	396	0.0646878	3.23425
Mzt1	mitotic spindle organizing protein 1 [Source:MGI Symbol;Acc:MGI:1924039]	chr14:99035786-99036510	ENSMUSG00000033186.9	chr14	99035786	99036510	-	725	0.064617	2.04365
Rps6kb1	ribosomal protein S6 kinase, polypeptide 1 [Source:MGI Symbol;Acc:MGI:1270849]	chr11:86502033-86502962	ENSMUSG00000020516.15	chr11	86502033	86502962	-	930	0.0644259	1.72198
Plekha1	pleckstrin homology domain containing, family A (phosphoinositide binding specific) member 1 [Source:MGI Symbol;Acc:MGI:2442213]	chr7:130908336-130908900	ENSMUSG00000040268.17	chr7	130908336	130908900	+	565	0.0644036	0.669788
Asph	aspartate-beta-hydroxylase [Source:MGI Symbol;Acc:MGI:1914186]	chr4:9633116-9635969	ENSMUSG00000028207.18	chr4	9633116	9635969	-	2854	0.0643697	0.467676
Ssna1	SS nuclear autoantigen 1 [Source:MGI Symbol;Acc:MGI:1915725]	chr2:25271086-25271581	ENSMUSG00000026966.6	chr2	25271086	25271581	-	496	0.064367	1.45369
Rtl4	retrotransposon Gag like 4 [Source:MGI Symbol;Acc:MGI:3588192]	chrX:145119333-145122411	ENSMUSG00000071679.4	chrX	145119333	145122411	+	3079	0.0642365	1.21285
Ptpn1	protein tyrosine phosphatase, non-receptor type 1 [Source:MGI Symbol;Acc:MGI:97805]	chr2:167965010-167965110	ENSMUSG00000027540.13	chr2	167965010	167965110	+	101	0.0640127	1.01034
Dpf1	D4, zinc and double PHD fingers family 1 [Source:MGI Symbol;Acc:MGI:1352748]	chr7:29315063-29318243	ENSMUSG00000030584.14	chr7	29315063	29318243	+	3181	0.0639512	1.86906
Podn	podocan [Source:MGI Symbol;Acc:MGI:2674939]	chr4:108021154-108021526	ENSMUSG00000028600.15	chr4	108021154	108021526	-	373	0.0639236	1.29142
Eif6	eukaryotic translation initiation factor 6 [Source:MGI Symbol;Acc:MGI:1196288]	chr2:155826125-155826436	ENSMUSG00000027613.15	chr2	155826125	155826436	-	312	0.0634301	1.3855
Samd11	sterile alpha motif domain containing 11 [Source:MGI Symbol;Acc:MGI:2446220]	chr4:156247176-156247969	ENSMUSG00000096351.2	chr4	156247176	156247969	-	794	0.0632944	1.4608
D2hgdh	D-2-hydroxyglutarate dehydrogenase [Source:MGI Symbol;Acc:MGI:2138209]	chr1:93850567-93852348	ENSMUSG00000073609.9	chr1	93850567	93852348	+	1782	0.0631608	1.18629
S100a16	S100 calcium binding protein A16 [Source:MGI Symbol;Acc:MGI:1915110]	chr3:90542365-90543148	ENSMUSG00000074457.10	chr3	90542365	90543148	+	784	0.0631078	1.32906
S100a16	S100 calcium binding protein A16 [Source:MGI Symbol;Acc:MGI:1915110]	chr3:90542365-90543151	ENSMUSG00000074457.10	chr3	90542365	90543151	+	787	0.0631078	1.32906
Gpatch1	G patch domain containing 1 [Source:MGI Symbol;Acc:MGI:1914721]	chr7:35288517-35288680	ENSMUSG00000063808.14	chr7	35288517	35288680	-	164	0.0630688	4.20321
Sulf2	sulfatase 2 [Source:MGI Symbol;Acc:MGI:1919293]	chr2:166075772-166076018	ENSMUSG00000006800.14	chr2	166075772	166076018	-	247	0.0630367	0.489538
Lnx1	ligand of numb-protein X 1 [Source:MGI Symbol;Acc:MGI:1278335]	chr5:74606037-74606262	ENSMUSG00000029228.15	chr5	74606037	74606262	-	226	0.0629844	1.03718
Slc35a2	solute carrier family 35 (UDP-galactose transporter), member A2 [Source:MGI Symbol;Acc:MGI:1345297]	chrX:7892140-7893260	ENSMUSG00000031156.18	chrX	7892140	7893260	+	1121	0.0629598	1.19645
Vps29	VPS29 retromer complex component [Source:MGI Symbol;Acc:MGI:1928344]	chr5:122362036-122362237	ENSMUSG00000029462.18	chr5	122362036	122362237	+	202	0.0629314	1.80437
Gpatch2	G patch domain containing 2 [Source:MGI Symbol;Acc:MGI:1915019]	chr1:187348357-187350723	ENSMUSG00000039210.16	chr1	187348357	187350723	+	2367	0.0629142	1.45408
Cabin1	calcineurin binding protein 1 [Source:MGI Symbol;Acc:MGI:1298375]	chr10:75761247-75764341	ENSMUSG00000020196.10	chr10	75761247	75764341	-	3095	0.0627885	0.19848
Inpp5k	inositol polyphosphate 5-phosphatase K [Source:MGI Symbol;Acc:MGI:1194899]	chr11:75638145-75638256	ENSMUSG00000006127.9	chr11	75638145	75638256	+	112	0.0627545	1.07393
Tmem181b-ps	transmembrane protein 181B, pseudogene [Source:MGI Symbol;Acc:MGI:3779544]	chr17:6447345-6448616	ENSMUSG00000096780.7	chr17	6447345	6448616	-	1272	0.0626896	0.476738
Lonp1	lon peptidase 1, mitochondrial [Source:MGI Symbol;Acc:MGI:1921392]	chr17:56616359-56616446	ENSMUSG00000041168.10	chr17	56616359	56616446	-	88	0.0626851	2.17529
Tbc1d10a	TBC1 domain family, member 10a [Source:MGI Symbol;Acc:MGI:2144164]	chr11:4212978-4213043	ENSMUSG00000034412.13	chr11	4212978	4213043	+	66	0.0625008	1.11023
Rabggtb	Rab geranylgeranyl transferase, b subunit [Source:MGI Symbol;Acc:MGI:99537]	chr3:153909414-153909459	ENSMUSG00000038975.14	chr3	153909414	153909459	-	46	0.0624342	2.68655
Slc25a4	solute carrier family 25 (mitochondrial carrier, adenine nucleotide translocator), member 4 [Source:MGI Symbol;Acc:MGI:1353495]	chr8:46210812-46211284	ENSMUSG00000031633.4	chr8	46210812	46211284	-	473	0.0623591	0.688266
Eif4e2	eukaryotic translation initiation factor 4E member 2 [Source:MGI Symbol;Acc:MGI:1914440]	chr1:87237846-87240488	ENSMUSG00000026254.17	chr1	87237846	87240488	+	2643	0.0622742	1.41071
Zfp414	zinc finger protein 414 [Source:MGI Symbol;Acc:MGI:1915641]	chr17:33631129-33631463	ENSMUSG00000073423.10	chr17	33631129	33631463	+	335	0.0622675	1.62407
Clcn4	chloride channel, voltage-sensitive 4 [Source:MGI Symbol;Acc:MGI:104571]	chr7:7300651-7300851	ENSMUSG00000000605.9	chr7	7300651	7300851	-	201	0.0621859	0.208311
Clint1	clathrin interactor 1 [Source:MGI Symbol;Acc:MGI:2144243]	chr11:45887386-45887550	ENSMUSG00000006169.20	chr11	45887386	45887550	+	165	0.0620943	1.9688
Podn	podocan [Source:MGI Symbol;Acc:MGI:2674939]	chr4:108017707-108017904	ENSMUSG00000028600.15	chr4	108017707	108017904	-	198	0.0620365	1.48754
Jak3	Janus kinase 3 [Source:MGI Symbol;Acc:MGI:99928]	chr8:71684217-71684368	ENSMUSG00000031805.17	chr8	71684217	71684368	+	152	0.0619998	1.23796
Vps29	VPS29 retromer complex component [Source:MGI Symbol;Acc:MGI:1928344]	chr5:122362036-122362268	ENSMUSG00000029462.18	chr5	122362036	122362268	+	233	0.0618467	1.88617
Atg2b	autophagy related 2B [Source:MGI Symbol;Acc:MGI:1923809]	chr12:105622707-105623984	ENSMUSG00000041341.10	chr12	105622707	105623984	-	1278	0.0617757	0.820056
Ccdc51	coiled-coil domain containing 51 [Source:MGI Symbol;Acc:MGI:1913908]	chr9:109091515-109092489	ENSMUSG00000025645.8	chr9	109091515	109092489	+	975	0.0614485	1.26672
Vps29	VPS29 retromer complex component [Source:MGI Symbol;Acc:MGI:1928344]	chr5:122362036-122362271	ENSMUSG00000029462.18	chr5	122362036	122362271	+	236	0.0612936	1.81807
Bok	BCL2-related ovarian killer [Source:MGI Symbol;Acc:MGI:1858494]	chr1:93695037-93695455	ENSMUSG00000026278.14	chr1	93695037	93695455	+	419	0.0612775	1.70765
Vps29	VPS29 retromer complex component [Source:MGI Symbol;Acc:MGI:1928344]	chr5:122362036-122362492	ENSMUSG00000029462.18	chr5	122362036	122362492	+	457	0.0609869	1.79245
Tut7	terminal uridylyl transferase 7 [Source:MGI Symbol;Acc:MGI:2387179]	chr13:59795036-59797130	ENSMUSG00000035248.9	chr13	59795036	59797130	-	2095	0.0609795	0.461957
Rasa4	RAS p21 protein activator 4 [Source:MGI Symbol;Acc:MGI:1858600]	chr5:136101244-136101394	ENSMUSG00000004952.13	chr5	136101244	136101394	+	151	0.0608933	1.21041
Eno1	enolase 1, alpha non-neuron [Source:MGI Symbol;Acc:MGI:95393]	chr4:150243486-150244074	ENSMUSG00000063524.13	chr4	150243486	150244074	+	589	0.0608102	0.137089
Cox6b2	cytochrome c oxidase subunit 6B2 [Source:MGI Symbol;Acc:MGI:3044182]	chr7:4752724-4752849	ENSMUSG00000051811.14	chr7	4752724	4752849	-	126	0.0607724	1.3262
Rfc2	replication factor C (activator 1) 2 [Source:MGI Symbol;Acc:MGI:1341868]	chr5:134593189-134593346	ENSMUSG00000023104.9	chr5	134593189	134593346	+	158	0.060705	1.86894
Cox6b2	cytochrome c oxidase subunit 6B2 [Source:MGI Symbol;Acc:MGI:3044182]	chr7:4752724-4753023	ENSMUSG00000051811.14	chr7	4752724	4753023	-	300	0.0606286	1.68248
Ubtf	upstream binding transcription factor, RNA polymerase I [Source:MGI Symbol;Acc:MGI:98512]	chr11:102306298-102306766	ENSMUSG00000020923.17	chr11	102306298	102306766	-	469	0.060539	1.67637
Ankrd34b	ankyrin repeat domain 34B [Source:MGI Symbol;Acc:MGI:2443245]	chr13:92438239-92440930	ENSMUSG00000045034.12	chr13	92438239	92440930	+	2692	0.0603147	1.5695
Cbln2	cerebellin 2 precursor protein [Source:MGI Symbol;Acc:MGI:88282]	chr18:86713048-86713425	ENSMUSG00000024647.14	chr18	86713048	86713425	+	378	0.0602894	1.0637
Psme3ip1	proteasome activator subunit 3 interacting protein 1 [Source:MGI Symbol;Acc:MGI:1919637]	chr8:94575664-94575857	ENSMUSG00000031774.8	chr8	94575664	94575857	-	194	0.0601234	1.9094
Arhgap1	Rho GTPase activating protein 1 [Source:MGI Symbol;Acc:MGI:2445003]	chr2:91670712-91671361	ENSMUSG00000027247.16	chr2	91670712	91671361	+	650	0.0600629	1.31621
Plekha6	pleckstrin homology domain containing, family A member 6 [Source:MGI Symbol;Acc:MGI:2388662]	chr1:133299709-133301617	ENSMUSG00000041757.17	chr1	133299709	133301617	+	1909	0.0599015	1.28416
Xylt2	xylosyltransferase II [Source:MGI Symbol;Acc:MGI:2444797]	chr11:94666871-94667294	ENSMUSG00000020868.15	chr11	94666871	94667294	-	424	0.0598913	0.841904
Bad	BCL2-associated agonist of cell death [Source:MGI Symbol;Acc:MGI:1096330]	chr19:6950640-6951889	ENSMUSG00000024959.14	chr19	6950640	6951889	+	1250	0.0597796	1.07774
Mmp24	matrix metallopeptidase 24 [Source:MGI Symbol;Acc:MGI:1341867]	chr2:155815711-155818366	ENSMUSG00000027612.7	chr2	155815711	155818366	+	2656	0.0596937	1.19694
Zfp788	zinc finger protein 788 [Source:MGI Symbol;Acc:MGI:1914857]	chr7:41647491-41647617	ENSMUSG00000074165.10	chr7	41647491	41647617	+	127	0.0596841	0.771514
Vps25	vacuolar protein sorting 25 [Source:MGI Symbol;Acc:MGI:106354]	chr11:101258910-101259210	ENSMUSG00000078656.11	chr11	101258910	101259210	+	301	0.0596654	1.36803
Cox6b1	cytochrome c oxidase, subunit 6B1 [Source:MGI Symbol;Acc:MGI:107460]	chr7:30616861-30617162	ENSMUSG00000036751.7	chr7	30616861	30617162	-	302	0.0595951	1.47274
Bckdha	branched chain ketoacid dehydrogenase E1, alpha polypeptide [Source:MGI Symbol;Acc:MGI:107701]	chr7:25631638-25631844	ENSMUSG00000060376.7	chr7	25631638	25631844	-	207	0.0595085	2.03056
Drosha	drosha, ribonuclease type III [Source:MGI Symbol;Acc:MGI:1261425]	chr15:12842300-12842531	ENSMUSG00000022191.16	chr15	12842300	12842531	+	232	0.0592458	1.25771
Cox6b1	cytochrome c oxidase, subunit 6B1 [Source:MGI Symbol;Acc:MGI:107460]	chr7:30616974-30617162	ENSMUSG00000036751.7	chr7	30616974	30617162	-	189	0.0592051	1.46732
Dgat2	diacylglycerol O-acyltransferase 2 [Source:MGI Symbol;Acc:MGI:1915050]	chr7:99156977-99157179	ENSMUSG00000030747.5	chr7	99156977	99157179	-	203	0.0591146	1.32972
Cox6b2	cytochrome c oxidase subunit 6B2 [Source:MGI Symbol;Acc:MGI:3044182]	chr7:4752724-4752880	ENSMUSG00000051811.14	chr7	4752724	4752880	-	157	0.0590857	1.07283
Gap43	growth associated protein 43 [Source:MGI Symbol;Acc:MGI:95639]	chr16:42248442-42249114	ENSMUSG00000047261.9	chr16	42248442	42249114	-	673	0.0589743	2.6786
Gap43	growth associated protein 43 [Source:MGI Symbol;Acc:MGI:95639]	chr16:42248458-42249114	ENSMUSG00000047261.9	chr16	42248458	42249114	-	657	0.0589743	2.6786
Tmem163	transmembrane protein 163 [Source:MGI Symbol;Acc:MGI:1919410]	chr1:127677431-127679548	ENSMUSG00000026347.13	chr1	127677431	127679548	-	2118	0.058912	0.600669
Ubxn2a	UBX domain protein 2A [Source:MGI Symbol;Acc:MGI:2442310]	chr12:4879349-4880771	ENSMUSG00000020634.12	chr12	4879349	4880771	-	1423	0.0588374	1.11264
Arl8a	ADP-ribosylation factor-like 8A [Source:MGI Symbol;Acc:MGI:1915974]	chr1:135146824-135147100	ENSMUSG00000026426.10	chr1	135146824	135147100	+	277	0.0587873	0.829527
Rnf4	ring finger protein 4 [Source:MGI Symbol;Acc:MGI:1201691]	chr5:34336380-34336484	ENSMUSG00000029110.13	chr5	34336380	34336484	+	105	0.0586018	0.602067
Pycr2	pyrroline-5-carboxylate reductase family, member 2 [Source:MGI Symbol;Acc:MGI:1277956]	chr1:180906790-180906902	ENSMUSG00000026520.8	chr1	180906790	180906902	+	113	0.0585185	1.65483
Trappc1	trafficking protein particle complex 1 [Source:MGI Symbol;Acc:MGI:1098727]	chr11:69325439-69325793	ENSMUSG00000049299.14	chr11	69325439	69325793	+	355	0.0584838	2.5274
Sptbn1	spectrin beta, non-erythrocytic 1 [Source:MGI Symbol;Acc:MGI:98388]	chr11:30106785-30109152	ENSMUSG00000020315.18	chr11	30106785	30109152	-	2368	0.0584517	0.941826
Pdlim7	PDZ and LIM domain 7 [Source:MGI Symbol;Acc:MGI:1914649]	chr13:55506774-55508326	ENSMUSG00000021493.15	chr13	55506774	55508326	-	1553	0.0584314	1.2403
Clasrp	CLK4-associating serine/arginine rich protein [Source:MGI Symbol;Acc:MGI:1855695]	chr7:19585090-19585347	ENSMUSG00000061028.7	chr7	19585090	19585347	-	258	0.058421	1.72541
Adam22	a disintegrin and metallopeptidase domain 22 [Source:MGI Symbol;Acc:MGI:1340046]	chr5:8130485-8130535	ENSMUSG00000040537.17	chr5	8130485	8130535	-	51	0.0583684	1.12603
Cnpy2	canopy FGF signaling regulator 2 [Source:MGI Symbol;Acc:MGI:1928477]	chr10:128323330-128323442	ENSMUSG00000025381.3	chr10	128323330	128323442	+	113	0.0583251	1.03379
Atp1b3	ATPase, Na+/K+ transporting, beta 3 polypeptide [Source:MGI Symbol;Acc:MGI:107788]	chr9:96343268-96343581	ENSMUSG00000032412.8	chr9	96343268	96343581	-	314	0.0583172	0.665499
Rtca	RNA 3-terminal phosphate cyclase [Source:MGI Symbol;Acc:MGI:1913618]	chr3:116507751-116507851	ENSMUSG00000000339.14	chr3	116507751	116507851	-	101	0.0582287	1.03308
Dbn1	drebrin 1 [Source:MGI Symbol;Acc:MGI:1931838]	chr13:55476146-55476773	ENSMUSG00000034675.17	chr13	55476146	55476773	-	628	0.0581799	1.24277
Rab7b	RAB7B, member RAS oncogene family [Source:MGI Symbol;Acc:MGI:2442295]	chr1:131711620-131715439	ENSMUSG00000052688.12	chr1	131711620	131715439	+	3820	0.0580134	1.08064
Tbpl1	TATA box binding protein-like 1 [Source:MGI Symbol;Acc:MGI:1339946]	chr10:22705381-22705895	ENSMUSG00000071359.13	chr10	22705381	22705895	-	515	0.0580054	1.19775
Apex1	apurinic/apyrimidinic endonuclease 1 [Source:MGI Symbol;Acc:MGI:88042]	chr14:50926525-50927139	ENSMUSG00000035960.14	chr14	50926525	50927139	+	615	0.0578471	1.5417
Nudt8	nudix (nucleoside diphosphate linked moiety X)-type motif 8 [Source:MGI Symbol;Acc:MGI:1913637]	chr19:4000631-4001328	ENSMUSG00000110949.1	chr19	4000631	4001328	+	698	0.0576502	1.21417
Eif4a2	eukaryotic translation initiation factor 4A2 [Source:MGI Symbol;Acc:MGI:106906]	chr16:23110580-23110796	ENSMUSG00000022884.16	chr16	23110580	23110796	+	217	0.0576011	1.2604
Trappc11	trafficking protein particle complex 11 [Source:MGI Symbol;Acc:MGI:2444585]	chr8:47513283-47513808	ENSMUSG00000038102.15	chr8	47513283	47513808	-	526	0.057544	0.722662
Hnrnpd	heterogeneous nuclear ribonucleoprotein D [Source:MGI Symbol;Acc:MGI:101947]	chr5:99955935-99961333	ENSMUSG00000000568.15	chr5	99955935	99961333	-	5399	0.0574504	1.48032
Ndufs5	NADH:ubiquinone oxidoreductase core subunit S5 [Source:MGI Symbol;Acc:MGI:1890889]	chr4:123715864-123716326	ENSMUSG00000028648.13	chr4	123715864	123716326	-	463	0.0574189	1.11316
Lyplal1	lysophospholipase-like 1 [Source:MGI Symbol;Acc:MGI:2385115]	chr1:186087731-186088768	ENSMUSG00000039246.8	chr1	186087731	186088768	-	1038	0.0573136	1.0636
Akap8l	A kinase (PRKA) anchor protein 8-like [Source:MGI Symbol;Acc:MGI:1860606]	chr17:32333003-32335623	ENSMUSG00000002625.10	chr17	32333003	32335623	-	2621	0.0571545	1.112
Kctd10	potassium channel tetramerisation domain containing 10 [Source:MGI Symbol;Acc:MGI:2141207]	chr5:114364462-114365866	ENSMUSG00000001098.15	chr5	114364462	114365866	-	1405	0.0571059	1.12506
Serpina3n	serine (or cysteine) peptidase inhibitor, clade A, member 3N [Source:MGI Symbol;Acc:MGI:105045]	chr12:104413412-104414329	ENSMUSG00000021091.8	chr12	104413412	104414329	+	918	0.0570191	1.16909
[truncated: 6,459 more rows]
