# Supplementary material for: KIS counteracts PTBP2 and regulates alternative exon usage in neurons
Source: eLife. 2024 Apr 10;13:e96048. doi: 10.7554/eLife.96048 (PMC11045219; doi:10.7554/eLife.96048)
Supplement: Supplementary file 2. [file elife-96048-supp2.xlsx]

## Sheet: Dataset legend
Dataset EV3
Phosphoproteomic analysis of HEK293T transfected with plasmids expressing KIS and KISK54A. After protease digestion, samples were labelled with isobaric tags, TMT126 for KIS and TMT131 for KISK54A. Log2 Fold Change (FC) of Maxquant normalized 126TM/131TM ratio values from three independent analysis is shown. A one-sample two-way t-test analysis was used to identify significant changes (Benjamini-…

## Sheet: PhosphoSites
Log2 FC	Intensity	126-131 Ratio Significance A	T-test Significant	Gene names	Protein names	Uniprot Proteins	Majority protein IDs	Amino acid	Positions within proteins	PhosphoSitePlus window	Short sequence window
2.36202	13152000	5.97384e-62	+	PTBP2	Polypyrimidine tract-binding protein 2	Q9UKA9;Q9UKA9-2;B4DI28;Q9UKA9-5	Q9UKA9	S	308;308;277;308	LAVPGALsPLAIPNA	TSLLAVPGALSPLAIPNAAAA
2.35703	10511000	1.07147e-61	+	FUBP3	Far upstream element-binding protein 3	Q96I24	Q96I24	S	439	APGAFGQsPFsQPPA	NLGAPGAFGQSPFSQPPAPPH
1.78192	80597000	5.20596e-36	+	SUGP1	SURP and G-patch domain-containing protein 1	Q8IWZ8	Q8IWZ8	S	409	VQRDVDAsPsPLsVQ	AELVQRDVDASPSPLSVQDLK
1.78192	80597000	5.20596e-36	+	SUGP1	SURP and G-patch domain-containing protein 1	Q8IWZ8	Q8IWZ8	S	411	RDVDAsPsPLsVQDL	LVQRDVDASPSPLSVQDLKGL
1.77428	18157000	1.02313e-35	+	MATR3	Matrin-3	D6REM6;A8MXP9;P43243;D6R991	D6REM6	S	126;126;126;126	ARDLDELsRyPEDkI	GLSARDLDELSRYPEDKITPE
1.72439	319660000	7.89015e-34	+	UHMK1	Serine/threonine-protein kinase Kist	Q8TAS1;Q8TAS1-2	Q8TAS1	S	33;33		WQVQSRLGSGSSASVYRVRCC
1.72439	802270000	7.89015e-34	+	UHMK1	Serine/threonine-protein kinase Kist	Q8TAS1;Q8TAS1-2	Q8TAS1	S	36;36		QSRLGSGSSASVYRVRCCGNP
1.71585	103920000	1.63948e-33	+	HNRNPM	Heterogeneous nuclear ribonucleoprotein M	P52272-2;P52272;Q59ES8	P52272-2	S	358;397;282	GGGGGGGsVPGIERM	AKQGGGGGGGSVPGIERMGPG
1.69407	1283700	1.04145e-32	+	PSMA1	Proteasome subunit alpha type-1	F5GX11;P25786;P25786-2	F5GX11	S	205;230;236	IYDDDDVsPFLEGLE	EFTIYDDDDVSPFLEGLEERP
1.68226	548260	2.81086e-32	+	ARHGAP39	Rho GTPase-activating protein 39	Q9C0H5;Q9C0H5-2	Q9C0H5	S	652;652		LASPEPYLHPSQSEDLAACAQ
1.68226	548260	2.81086e-32	+	ARHGAP39	Rho GTPase-activating protein 39	Q9C0H5;Q9C0H5-2	Q9C0H5	S	654;654		SPEPYLHPSQSEDLAACAQFE
1.55106	1759200	1.09438e-27	+	RPS13	40S ribosomal protein S13	E9PS50;P62277	E9PS50	S	14;14		MHAPGKGLSQSALPYRRSVPT
1.54765	3716900	1.42438e-27	+	EIF3A	Eukaryotic translation initiation factor 3 subunit A	F5H335;Q14152	F5H335	T	89;123		LDIEDLDNIQTPESVLLSAVS
1.47582	45629000	3.20717e-25	+	HELLS	Lymphoid-specific helicase	Q9NRZ9-6;Q9NRZ9-5;Q9NRZ9-3;Q9NRZ9-2;Q9NRZ9	Q9NRZ9-6	S	702;734;800;816;832	ILENsEDssPECLF_	IFKILENSEDSSPECLF____
1.47582	52919000	3.20717e-25	+	HELLS	Lymphoid-specific helicase	Q9NRZ9-6;Q9NRZ9-5;Q9NRZ9-3;Q9NRZ9-2;Q9NRZ9	Q9NRZ9-6	S	703;735;801;817;833	LENsEDssPECLF__	FKILENSEDSSPECLF_____
1.46309	319660000	8.16046e-25	+	UHMK1	Serine/threonine-protein kinase Kist	Q8TAS1;Q8TAS1-2	Q8TAS1	S	33;33		WQVQSRLGSGSSASVYRVRCC
1.46309	50968000	8.16046e-25	+	UHMK1	Serine/threonine-protein kinase Kist	Q8TAS1;Q8TAS1-2	Q8TAS1	S	34;34		QVQSRLGSGSSASVYRVRCCG
1.46309	802270000	8.16046e-25	+	UHMK1	Serine/threonine-protein kinase Kist	Q8TAS1;Q8TAS1-2	Q8TAS1	S	36;36		QSRLGSGSSASVYRVRCCGNP
1.40814	81604000	4.18975e-23	+	RAVER1	Ribonucleoprotein PTB-binding 1	Q8IY67-2;E9PAU2	Q8IY67-2	S	707;724	sFAHLLPsPEPsPEG	QKRSFAHLLPSPEPSPEGSYV
1.40814	80009000	4.18975e-23	+	RAVER1	Ribonucleoprotein PTB-binding 1	Q8IY67-2;E9PAU2	Q8IY67-2	S	711;728	LLPsPEPsPEGSYVG	FAHLLPSPEPSPEGSYVGQHS
1.3846	2609900	2.16422e-22	+	ATXN2	Ataxin-2	F8WB06;F8VQP2;Q99700-4;Q99700;F8WB05;F8VZC1	F8WB06	S	854;852;1117;1117;172;42		CPKLPYNKETSPSFYFAISTG
1.3746	2523800	4.31346e-22	+	UTRN	Utrophin	P46939	P46939	S	2008	DTCAPGGsLDLEKAR	LLVDTCAPGGSLDLEKARIHQ
1.26406	1030500	6.34535e-19	+	ZFPL1	Zinc finger protein-like 1	E9PQA5;E9PQ47;E9PNY1;O95159	E9PQA5	S	136;142;142;142		LGLPLIDEVVSPEPEPLNTSD
1.25816	1320200	9.20924e-19	+	PCBP1	Poly(rC)-binding protein 1	Q15365	Q15365	S	189	PyQPMPAssPVICAG	MTIPYQPMPASSPVICAGGQD
1.25816	1320200	9.20924e-19	+	PCBP1	Poly(rC)-binding protein 1	Q15365	Q15365	S	190	yQPMPAssPVICAGG	TIPYQPMPASSPVICAGGQDR
1.20552	665140	2.37043e-17	+	SALL1	Sal-like protein 1	E9PCU5;Q9NSC2	E9PCU5	S	80;80		LVLIVNENPASPPETFSPSPP
1.17367	17358000	1.58372e-16	+	UHMK1	Serine/threonine-protein kinase Kist	Q8TAS1;G3V1M1	Q8TAS1	S	382;308		VFVEYANAGDSKAAQKLLTGR
1.10699	821290000	7.19842e-15	+	TCP1	T-complex protein 1 subunit alpha	P17987;F5H282;E7EQR6	P17987	S	551;327;396	syEDAVHsGALND__	KHGSYEDAVHSGALND_____
1.04288	556950000	2.3015e-13	+	HNRNPC	Heterogeneous nuclear ribonucleoproteins C1/C2	G3V2Q1;P07910;B2R603;G3V555;G3V575;G3V576;B4DSU6	G3V2Q1	S	113;113;113;113;113;113;113	GsVtEHPsPsPLLss	EMYGSVTEHPSPSPLLSSSFD
1.03424	467160000	3.61507e-13	+	HNRNPC	Heterogeneous nuclear ribonucleoproteins C1/C2	G3V2Q1;P07910;B2R603;G3V555;G3V575;G3V576;B4DSU6	G3V2Q1	S	115;115;115;115;115;115;115	VtEHPsPsPLLsssF	YGSVTEHPSPSPLLSSSFDLD
1.01913	2249800	7.89893e-13	+	CENPC	Centromere protein C	H0Y8J2;Q03188;Q6PIR0	H0Y8J2	S	62;155;155		HSEADEEFYLSVGSPSVLLDA
1.01913	5991900	7.89893e-13	+	CENPC	Centromere protein C	H0Y8J2;Q03188;Q6PIR0	H0Y8J2	S	65;158;158	EFYLSVGsPsVLLDA	ADEEFYLSVGSPSVLLDAKTS
1.01151	65267000	1.16587e-12	+	SPAG5	Sperm-associated antigen 5	Q96R06	Q96R06	S	86	sSEHFSHsSKWLEtC	TDLSSEHFSHSSKWLETCQHE
1.01151	65267000	1.16587e-12	+	SPAG5	Sperm-associated antigen 5	Q96R06	Q96R06	S	87		DLSSEHFSHSSKWLETCQHES
1.00447	3153800	1.66768e-12	+	RBM12	RNA-binding protein 12	Q9NTZ6	Q9NTZ6	S	375	IQRYVEVsPAtERQW	MLMIQRYVEVSPATERQWVAA
1.0027	1440800	1.82307e-12	+	DTNBP1	Dysbindin	D6RJC6;F8WCM4;A6NFV8;Q96EV8	D6RJC6	S	195;270;352;351		ATPDGGEDSDS__________
0.992723	370480	3.01183e-12	+	SPEN	Msx2-interacting protein	Q96T58	Q96T58	S	3466	VPTTSGPstPPGLVL	PLFVPTTSGPSTPPGLVLPHT
0.977262	47103000	6.49165e-12	+	LASP1	LIM and SH3 domain protein 1	C9J9W2;B4DGQ0;Q14847;Q14847-2	C9J9W2	S	110;90;146;146	MEPERRDsQDGssyR	GEGMEPERRDSQDGSSYRRPL
0.976129	4195100	6.86467e-12	+	FIP1L1	Pre-mRNA 3'-end-processing factor FIP1	Q6UN15-3;G3XAD6;Q6UN15;Q6UN15-4	Q6UN15-3	S	221;244;259;244	STKAEFTsPPsLFKT;StkAEFtsPPsLFKT	ALPSTKAEFTSPPSLFKTGLP
0.976129	4195100	6.86467e-12	+	FIP1L1	Pre-mRNA 3'-end-processing factor FIP1	Q6UN15-3;G3XAD6;Q6UN15;Q6UN15-4	Q6UN15-3	T	220;243;258;243	PStkAEFtsPPsLFK	TALPSTKAEFTSPPSLFKTGL
0.966442	80597000	1.10355e-11	+	SUGP1	SURP and G-patch domain-containing protein 1	Q8IWZ8	Q8IWZ8	S	409	VQRDVDAsPsPLsVQ	AELVQRDVDASPSPLSVQDLK
0.966442	80597000	1.10355e-11	+	SUGP1	SURP and G-patch domain-containing protein 1	Q8IWZ8	Q8IWZ8	S	411	RDVDAsPsPLsVQDL	LVQRDVDASPSPLSVQDLKGL
0.966442	2040200	1.10355e-11	+	SUGP1	SURP and G-patch domain-containing protein 1	Q8IWZ8	Q8IWZ8	S	414	DAsPsPLsVQDLKGL	RDVDASPSPLSVQDLKGLGYE
0.960461	680200	1.4761e-11	+	ZNF326	DBIRD complex subunit ZNF326	Q5BKZ1	Q5BKZ1	S	63	sYGMDNHsGGGGGsR	LNQSYGMDNHSGGGGGSRFGP
0.934466	802270000	5.12084e-11	+	UHMK1	Serine/threonine-protein kinase Kist	Q8TAS1;Q8TAS1-2	Q8TAS1	S	36;36		QSRLGSGSSASVYRVRCCGNP
0.887735	453610	4.41337e-10	+	MAP1A	Microtubule-associated protein 1A;MAP1A heavy chain;MAP1 light chain LC2	E9PGC8;P78559;P78559-2	E9PGC8	S	2035;1797;1797	RsPFEIIsPPAsPPE	KLTRSPFEIISPPASPPEMVG
0.887735	453610	4.41337e-10	+	MAP1A	Microtubule-associated protein 1A;MAP1A heavy chain;MAP1 light chain LC2	E9PGC8;P78559;P78559-2	E9PGC8	S	2039;1801;1801	EIIsPPAsPPEMVGQ	SPFEIISPPASPPEMVGQRVP
0.877272	5211000	7.04589e-10	+	LIN54	Protein lin-54 homolog	Q6MZP7;Q6MZP7-5;Q6MZP7-2	Q6MZP7	S	35;35;35		DDDSIEAVIVSSPIPMETELE
0.877272	2614200	7.04589e-10	+	LIN54	Protein lin-54 homolog	Q6MZP7;Q6MZP7-5;Q6MZP7-2	Q6MZP7	S	36;36;36		DDSIEAVIVSSPIPMETELEE
0.865281	2054200	1.19652e-09	+	LIN54	Protein lin-54 homolog	Q6MZP7;Q6MZP7-3	Q6MZP7	S	264;43	TGQTTQVsPPVIAGR	KAVTGQTTQVSPPVIAGRVLS
0.859626	1141200	1.5323e-09	+	EPN1	Epsin-1	B4DU91;Q9Y6I3-3;Q9Y6I3;Q9Y6I3-1	B4DU91	S	496;510;536;622		ATLTLNQLRLSPVPPVPGAPP
0.848064	2996600	2.52853e-09	+	PTBP1;PTBP2	Polypyrimidine tract-binding protein 1;Polypyrimidine tract-binding protein 2	P26599-3;P26599;P26599-2;A6NLN1;B4DSI2;B4DSS8;Q9UKA9-4;Q9UKA9-3;Q9UKA9;Q9UKA9-2	P26599-3;Q9UKA9	S	459;433;452;99;106;450;439;439;434;434	LtkDyGNsPLHRFKK;LTKDFGNsPLHRFKK	DQGLTKDFGNSPLHRFKKPGS
0.837946	134140000	3.89893e-09	+	PRPF38A	Pre-mRNA-splicing factor 38A	Q8NAV1;Q8NAV1-2	Q8NAV1	S	279;92	DRRHRsRsKsPGHHR	RSRDRRHRSRSKSPGHHRSHR
0.837946	134140000	3.89893e-09	+	PRPF38A	Pre-mRNA-splicing factor 38A	Q8NAV1;Q8NAV1-2	Q8NAV1	S	281;94	RHRsRsKsPGHHRSH	RDRRHRSRSKSPGHHRSHRHR
0.83052	14466000	5.34091e-09	+	ERBB2IP	Protein LAP2	Q96RT1-7;Q96RT1-6;Q96RT1-4;Q96RT1-5;Q96RT1-3;E7EQW9;Q96RT1-2;Q96RT1;E9PCR8	Q96RT1-7	S	444;444;444;444;444;444;444;444;444	MFIsDNEsFNPsLWE	EDVMFISDNESFNPSLWEEQR
0.827365	4349800	6.09992e-09	+	ARHGEF2	Rho guanine nucleotide exchange factor 2	F5H3H5;B7Z977;Q5VY93;Q92974	F5H3H5	S	159;231;187;186	NMRNRtLsVEsLIDE	DSLNMRNRTLSVESLIDEAEV
0.808573	22832000	1.3328e-08	+	UTP11L	Probable U3 small nucleolar RNA-associated protein 11	Q9Y3A2	Q9Y3A2	S	241	VkKETVNsPAIykFQ	KVKVKKETVNSPAIYKFQSRR
0.794066	93867000	2.40846e-08	+	ZNF638	Zinc finger protein 638	Q14966-3;Q14966;C9JBI6;F5H330;Q14966-2;Q14966-4;C9JWN0	Q14966-3	S	128;128;128;234;128;128;128	VTQVtEQsPKVQSRY	QSSVTQVTEQSPKVQSRYTKE
0.782384	4059500	3.85028e-08	+	ATRX	Transcriptional regulator ATRX	P46100-4;P46100;P46100-2;P46100-5;P46100-3	P46100-4	S	1489;1527;1323;1372;1410	VIEIEDAsPtKCPIT	LREVIEIEDASPTKCPITTKL
0.778943	30617000	4.4153e-08	+	HNRNPA0	Heterogeneous nuclear ribonucleoprotein A0	Q13151	Q13151	S	68	ADAAMAAsPHAVDGN	VEEADAAMAASPHAVDGNTVE
0.778616	1926900	4.47302e-08	+	CCNYL1	Cyclin-Y-like protein 1	Q8N7R7-3;Q8N7R7-2;Q8N7R7	Q8N7R7-3	S	272;291;342	CRAAMRRsFsADNFI	KDLCRAAMRRSFSADNFIGIQ
0.775723	35360000	5.01626e-08	+	HNRNPA3	Heterogeneous nuclear ribonucleoprotein A3	P51991;P51991-2;E7EWI9;E7ERJ4;H7C1J8	P51991	S	366;344;310;311;103	PyGGGyGsGGGsGGy	SGSPYGGGYGSGGGSGGYGSR
0.766862	14907000	7.10883e-08	+	TMPO	Lamina-associated polypeptide 2, isoforms beta/gamma;Thymopoietin;Thymopentin	P42167;G5E972;H0YJH7;P42167-2	P42167	S	354;314;189;245	EMFPyEAstPtGIsA	ILKEMFPYEASTPTGISASCR
0.763511	6635200	8.10278e-08	+	BUB3	Mitotic checkpoint protein BUB3	B4DDM6;O43684-2;O43684	B4DDM6	S	131;211;211	AVEyLDPsPEVQkkK	GRVAVEYLDPSPEVQKKKYAF
0.761967	36323000	8.6048e-08	+	HNRNPA2B1	Heterogeneous nuclear ribonucleoproteins A2/B1	P22626-2;P22626	P22626-2	S	329;341	GNyGPGGsGGsGGyG	YGGGNYGPGGSGGSGGYGGRS
0.756964	9799300	1.0447e-07	+	PHF8	Histone lysine demethylase PHF8	H3BLZ7;H0Y3N9;Q9UPP1-4;Q9UPP1-3;Q9UPP1-2;Q9UPP1;H0Y589	H3BLZ7	S	773;748;743;779;844;880;608	NsDDAPWsPKARVtP	KKKNSDDAPWSPKARVTPTLP
0.750758	57855000	1.32669e-07	+	PKM	Pyruvate kinase PKM;Pyruvate kinase	P14618-2;P14618;H3BTN5;E9PF79;H3BQ34;H3BT25;H3BUW1;H3BTJ2;H3BN34;H3BQZ3;H3BU13	P14618-2	S	37;37;37;37;37;37;37;37;37;37;37	MCRLDIDsPPItARN	LEHMCRLDIDSPPITARNTGI
0.727032	30617000	3.25207e-07	+	HNRNPA0	Heterogeneous nuclear ribonucleoprotein A0	Q13151	Q13151	S	68	ADAAMAAsPHAVDGN	VEEADAAMAASPHAVDGNTVE
0.727032	9917100	3.25207e-07	+	HNRNPA0	Heterogeneous nuclear ribonucleoprotein A0	Q13151	Q13151	T	76	PHAVDGNtVELKRAV	AASPHAVDGNTVELKRAVSRE
0.712379	3297800	5.58179e-07	+	NUP214	Nuclear pore complex protein Nup214	P35658-2;P35658-4;P35658;P35658-3;P35658-5;Q5JUP9;F5H131;B7ZAV2;H0Y837	P35658-2	S	1967;1968;1978;1979;1957;1572;1407;804;831		GGFGAAPVFGSPPTFGGSPGF
0.69764	467160000	9.51206e-07	+	HNRNPC	Heterogeneous nuclear ribonucleoproteins C1/C2	G3V2Q1;P07910;B2R603;G3V555;G3V575;G3V576;B4DSU6	G3V2Q1	S	115;115;115;115;115;115;115	VtEHPsPsPLLsssF	YGSVTEHPSPSPLLSSSFDLD
0.691485	908570	1.18472e-06	+	BRD2	Bromodomain-containing protein 2	F8VXF8;H0Y6K2;H0Y5T9;B0S7P1;Q658Y7;P25440;P25440-2;E9PIQ3;B0V072;H0Y602;B0V073;H0Y801;H0Y799	F8VXF8	S	128;254;254;248;128;248;248;248;248;254;248;250;250	PHPSVISsPLLKsLH	FNIPHPSVISSPLLKSLHSAG
0.686683	38361000	1.4043e-06	+	TTLL12	Tubulin--tyrosine ligase-like protein 12	E9PGR8;B1AH89;Q14166	E9PGR8	S	15;15;15	ERRPAERssPGQtPE	RGPERRPAERSSPGQTPEEGA
0.68383	17038000	1.55272e-06	+	DYNC1LI1	Cytoplasmic dynein 1 light intermediate chain 1	E9PHI6;Q9Y6G9;C9JLW1	E9PHI6	S	9;9;9		__MAAVGRVGSFGSSPPGLSS
0.675334	53135000	2.08957e-06	+	TOP2A	DNA topoisomerase 2-alpha	C9J5P2;P11388;P11388-2;P11388-3;P11388-4;H7BXX8;H7BXH5	C9J5P2	S	1368;1332;1358;1368;1413;1355;1412	KFtMDLDsDEDFsDF	TKTKFTMDLDSDEDFSDFDEK
0.675334	53135000	2.08957e-06	+	TOP2A	DNA topoisomerase 2-alpha	C9J5P2;P11388;P11388-2;P11388-3;P11388-4;H7BXX8;H7BXH5	C9J5P2	S	1373;1337;1363;1373;1418;1360;1417	LDsDEDFsDFDEKtD	TMDLDSDEDFSDFDEKTDDED
0.674571	847150	2.14568e-06	+	ASCC2	Activating signal cointegrator 1 complex subunit 2	F5H6J9;Q9H1I8	F5H6J9	S	528;604		VEEVPLQPGESLPYHSVYYED
0.673247	3682300	2.24647e-06	+	BMS1	Ribosome biogenesis protein BMS1 homolog	Q14692	Q14692	S	504		SEMDLPAFADSDDDLERSSAE
0.669769	510020	2.53345e-06	+	NCOR1	Nuclear receptor corepressor 1	E7EVK1;O75376-2;O75376;B4DJ25	E7EVK1	T	2337;2331;2434;1018	LLSAQyEtLsDsDD_	PAPLLSAQYETLSDSDD____
0.663235	335610	3.17051e-06	+	RBMS2	RNA-binding motif, single-stranded-interacting protein 2	F6W1U9;F8W1T6;Q15434	F6W1U9	S	108;108;108	FVDFDsPsAAQKAVT	GYGFVDFDSPSAAQKAVTALK
0.662526	10040000	3.24818e-06	+	COIL	Coilin	P38432	P38432	S	566	DPRLIIEsPsNTsst	ELIDPRLIIESPSNTSSTEPA
0.651147	5781600	4.77533e-06	+	RAVER1	Ribonucleoprotein PTB-binding 1	Q8IY67-2;E9PAU2;Q8IY67	Q8IY67-2	T	645;662;489		PLSHFYSGSPTSYFTSGLQAG
0.646478	465580	5.58345e-06	+	DSG2	Desmoglein-2	Q14126	Q14126	S	806	YSQEEtEsLNAsIGC	LLVYSQEETESLNASIGCCSF
0.641746	143750000	6.53517e-06	+	FAM169A	Soluble lamin-associated protein of 75 kDa	D6RB01;Q9Y6X4	D6RB01	S	575;635	SAEKAVDsssEEIEV	FTQSAEKAVDSSSEEIEVEVP
0.641746	137210000	6.53517e-06	+	FAM169A	Soluble lamin-associated protein of 75 kDa	D6RB01;Q9Y6X4	D6RB01	S	576;636	AEKAVDsssEEIEVE	TQSAEKAVDSSSEEIEVEVPV
0.641746	87484000	6.53517e-06	+	FAM169A	Soluble lamin-associated protein of 75 kDa	D6RB01;Q9Y6X4	D6RB01	S	577;637	EKAVDsssEEIEVEV	QSAEKAVDSSSEEIEVEVPVV
0.63972	1739700	6.98835e-06	+	PPP1R12A	Protein phosphatase 1 regulatory subunit 12A	F8VWB4;O14974-4;O14974-3;O14974-2;O14974;F8W8Q6;F8W7P1;F8W9E8;F5H1B6;H0YIS4;H0YHI8;F8VZN8	F8VWB4	S	358;445;445;445;445;445;445;445;445;140;49;445	LGLRktGsyGALAEI	TWRLGLRKTGSYGALAEITAS
0.63972	1739700	6.98835e-06	+	PPP1R12A	Protein phosphatase 1 regulatory subunit 12A	F8VWB4;O14974-4;O14974-3;O14974-2;O14974;F8W8Q6;F8W7P1;F8W9E8;F5H1B6;H0YIS4;H0YHI8;F8VZN8	F8VWB4	T	356;443;443;443;443;443;443;443;443;138;47;443	WRLGLRktGsyGALA	PATWRLGLRKTGSYGALAEIT
0.638164	1901000	7.35682e-06	+	PLEKHO1	Pleckstrin homology domain-containing family O member 1	Q5T4P8;Q5T4P9;Q53GL0-2;Q53GL0	Q5T4P8	S	151;88;237;271	tEKGRCAsLEEILSQ	LTPTEKGRCASLEEILSQRDA
0.635755	146670000	7.96401e-06	+	HNRNPK	Heterogeneous nuclear ribonucleoprotein K	B4DFF1;P61978;P61978-2;P61978-3;Q5T6W5;Q5T6W2;Q5T6W1	B4DFF1	S	348;353;353;329;318;329;284	DSAIDTWsPSEWQMA	ETWDSAIDTWSPSEWQMAYEP
0.634258	8618500	8.36497e-06	+	CHTF8	Chromosome transmission fidelity protein 8 homolog isoform 2	P0CG12	P0CG12	S	302	ASGNMGTsPSSMArV	FSQASGNMGTSPSSMARVPGP
0.620587	14504000	1.30385e-05	+	ZFP91;ZFP91-CNTF	E3 ubiquitin-protein ligase ZFP91	Q96JP5;H9KV86;Q96JP5-2;H3BTR0	Q96JP5	S	220;220;220;47		EEEEEEEMLISEEEIPFKDDP
0.615748	1867400	1.52242e-05	+	PKP4	Plakophilin-4	Q99569-2;Q99569	Q99569-2	T	1017;1017	HFItPVstLERDRFK	NQNHFITPVSTLERDRFKSHP
0.613	15350000	1.66169e-05	+	BRCA1	Breast cancer type 1 susceptibility protein	E7EP70;E9PFC7;E9PFZ0;P38398-4;P38398-2;P38398;F8W8H7;E7EMP0	E7EP70	S	895;1191;1144;1174;1191;1191;1191;1191	GELsRsPsPFtHTHL	VQKGELSRSPSPFTHTHLAQG
0.611785	37312000	1.72705e-05	+	NOTCH2	Neurogenic locus notch homolog protein 2;Notch 2 extracellular truncation;Notch 2 intracellular domain	Q04721	Q04721	S	1845	RGGSSDLsDEDEDAE	ASLRGGSSDLSDEDEDAEDSS
0.609958	165130000	1.82997e-05	+	RALY	RNA-binding protein Raly	Q9UKM9-2;Q9UKM9;Q5QPM1;Q5QPL9;Q5QPM0	Q9UKM9-2	S	119;135;135;119;69	FDYrGRLsPVPVPrA	YRLFDYRGRLSPVPVPRAVPV
0.609557	718190	1.85331e-05	+	ARID1A	AT-rich interactive domain-containing protein 1A	O14497-2;O14497	O14497-2	S	363;363	RSHHAPMsPGssGGG	AQQRSHHAPMSPGSSGGGGQP
0.603131	4031900	2.26862e-05	+	POTEA	POTE ankyrin domain family member A	Q6S8J7-2;Q6S8J7	Q6S8J7-2	S	6;6		_____MVAEVSPKLAASPMKK
0.597573	15364000	2.69794e-05	+	HNRNPA1	Heterogeneous nuclear ribonucleoprotein A1;Heterogeneous nuclear ribonucleoprotein A1, N-terminally processed	F8W6I7;P09651-2;P09651;F8VSB5;F8W1S7;H0YH80;F8W646	F8W6I7	S	240;240;240;240;240;111;124		GSRGGGGYGGSGDGYNGFGND
0.597206	1613300	2.72887e-05	+	CHAMP1	Chromosome alignment-maintaining phosphoprotein 1	Q96JM3	Q96JM3	S	142	QKLGSVLsPEsPKPt	METQKLGSVLSPESPKPTPLT
0.597206	1613300	2.72887e-05	+	CHAMP1	Chromosome alignment-maintaining phosphoprotein 1	Q96JM3	Q96JM3	S	145	GSVLsPEsPKPtPLt	QKLGSVLSPESPKPTPLTPLE
0.592197	626860000	3.1859e-05	+	PTBP1	Polypyrimidine tract-binding protein 1	P26599-3;P26599;P26599-2	P26599-3	S	140;140;140	HkELktDssPNQARA	FSNHKELKTDSSPNQARAQAA
0.587949	26156000	3.62971e-05	+	YTHDC2	Probable ATP-dependent RNA helicase YTHDC2	E9PE26;Q9H6S0	E9PE26	S	1173;1263	TDSSSYPsPCAsPsP	LKSTDSSSYPSPCASPSPPSS
0.587949	26156000	3.62971e-05	+	YTHDC2	Probable ATP-dependent RNA helicase YTHDC2	E9PE26;Q9H6S0	E9PE26	S	1177;1267	SYPsPCAsPsPPssG	DSSSYPSPCASPSPPSSGKGS
0.587949	16386000	3.62971e-05	+	YTHDC2	Probable ATP-dependent RNA helicase YTHDC2	E9PE26;Q9H6S0	E9PE26	S	1179;1269	PsPCAsPsPPssGKG	SSYPSPCASPSPPSSGKGSKS
0.581024	32053000	4.48117e-05	+	NSRP1	Nuclear speckle splicing regulatory protein 1	Q9H0G5;H7BYM1;F5H727	Q9H0G5	S	248;194;179	EENPDADsDFDAKss	VKVEENPDADSDFDAKSSADD
0.570026	678010	6.23339e-05	+	NOB1	RNA-binding protein NOB1	Q9ULX3	Q9ULX3	S	371		VFAPDYIAGVSPFVENDISSR
0.568895	734670	6.44651e-05	+	AHDC1	AT-hook DNA-binding motif-containing protein 1	Q5TGY3	Q5TGY3	S	1399	AGLQKAYsPtCsPtL	VFDAGLQKAYSPTCSPTLGFK
0.568895	734670	6.44651e-05	+	AHDC1	AT-hook DNA-binding motif-containing protein 1	Q5TGY3	Q5TGY3	T	1401	LQKAYsPtCsPtLGF	DAGLQKAYSPTCSPTLGFKEE
0.567903	3931400	6.63923e-05	+	EXOSC9	Exosome complex component RRP45	D6RIY6;Q06265-3;Q06265	D6RIY6	S	368;300;384		DTGVEVSDIGSQDAPIILSDS
0.565612	4972700	7.10495e-05	+	TCF20	Transcription factor 20	Q9UGU0-2;Q9UGU0;I3L1M7	Q9UGU0-2	S	31;31;31	SSRLEEFsPRQAQMF	VHGSSRLEEFSPRQAQMFQNF
0.565489	691650	7.13082e-05	+	KLHL22	Kelch-like protein 22	Q53GT1	Q53GT1	T	605	LLEPPRGtPDRSQAD	RSLLLEPPRGTPDRSQADPDF
0.564816	1230200	7.27376e-05	+	NDUFB9	NADH dehydrogenase [ubiquinone] 1 beta subcomplex subunit 9	E9PH64;E7EWZ0;E9PF49;Q9Y6M9	E9PH64	S	74;85;85;85	QPyIFPDsPGGtSyE	QHPQPYIFPDSPGGTSYERYD
0.564636	928110	7.31254e-05	+	VPS13D	Vacuolar protein sorting-associated protein 13D	Q5THJ4-2;Q5THJ4	Q5THJ4-2	S	1042;1042	LRDsRAQsPVSGPNV	TGSLRDSRAQSPVSGPNVAHL
0.56321	72045000	7.62624e-05	+	HTATSF1	HIV Tat-specific factor 1	O43719;E9PFP2	O43719	S	702;668	KLFEDDDsNEKLFDE	ADEKLFEDDDSNEKLFDEEED
0.558934	60570000	8.64523e-05	+	POLR2A	DNA-directed RNA polymerase II subunit RPB1	P24928	P24928	S	1906	sPVytPtsPKysPts	SPTSPVYTPTSPKYSPTSPTY
0.557066	2756200	9.12966e-05	+	PQBP1	Polyglutamine-binding protein 1	H7C053;O60828-5;O60828-4;O60828-2;O60828	H7C053	S	141;147;152;246;247	FQQRPYPsPGAVLRA	GPLFQQRPYPSPGAVLRANA_
0.55293	1947700	0.000102949	+	AFTPH	Aftiphilin	Q6ULP2-3;Q6ULP2-5;Q6ULP2-2;Q6ULP2-4;Q6ULP2	Q6ULP2-3	S	38;38;38;38;38		FGEFGGFSEVSPSGVGFVDFD
0.541349	1812700	0.00014349	+	VIM	Vimentin	P08670;B0YJC4;F5H288	P08670	S	87;87;74	LQDsVdFsLAdAINT	VRLLQDSVDFSLADAINTEFK
0.539347	62532000	0.000151873	+	HSP90B1	Endoplasmin	P14625;E9PEX3	P14625	T	786;536	DEEMDVGtDEEEETA	QDEDEEMDVGTDEEEETAKES
0.526882	1210500	0.000215339	+	YEATS2	YEATS domain-containing protein 2	Q9ULM3	Q9ULM3	S	447	SQVPNPEsPGksFQP	VPQSQVPNPESPGKSFQPITM
0.522272	3856100	0.000244571	+	LTV1	Protein LTV1 homolog	Q96GA3	Q96GA3	S	182	EGMDIQKsENEDDsE	GEEEGMDIQKSENEDDSEWED
0.522272	3856100	0.000244571	+	LTV1	Protein LTV1 homolog	Q96GA3	Q96GA3	S	188	KsENEDDsEWEDVDD	DIQKSENEDDSEWEDVDDEKG
0.520755	120960000	0.00025498	+	IKZF3	Zinc finger protein Aiolos	Q9UKT9-14;Q9UKT9-13;Q9UKT9-5;Q9UKT9-6;Q9UKT9-2;Q9UKT9-15;Q9UKT9-4;Q9UKT9-3;Q9UKT9	Q9UKT9-14	S	57;57;57;57;57;57;57;57;57	DEDIGDDsMKVKDEY	ANEDEDIGDDSMKVKDEYSER
0.518449	95384000	0.000271597	+	IGF2BP2	Insulin-like growth factor 2 mRNA-binding protein 2	F8W930;Q9Y6M1-5;Q9Y6M1-6;Q9Y6M1-3;Q9Y6M1-4;Q9Y6M1-1;Q9Y6M1	F8W930	S	170;101;96;101;107;164;164	DEEVssPsPPQRAQR	YIPDEEVSSPSPPQRAQRGDH
0.515946	1967500	0.000290776	+	CNBP	Cellular nucleic acid-binding protein	D6RAT4;P62633-2;P62633-5;P62633;P62633-4;E9PDR7	D6RAT4	S	41;40;40;47;47;47		SRGRGGFQFVSSSLPDICYRC
0.511764	7603100	0.000325692	+	UNK	RING finger protein unkempt homolog	Q9C0B0	Q9C0B0	S	467		QDMLGILPAGSPLTSSISSSI
0.509824	41378000	0.000343182	+	MCM2	DNA replication licensing factor MCM2	P49736;F8WDM3;F5H1E9;C9JZ21;C9J013	P49736	S	41;41;41;32;32	RtDALtssPGRDLPP	SSRRTDALTSSPGRDLPPFED
0.508798	9615200	0.000352787	+	FOXK1	Forkhead box protein K1	P85037;F5H8G8;P85037-2	P85037	S	213;96;50	HKEEAPAsPLRPLyP	SLYHKEEAPASPLRPLYPQIS
0.50779	59137000	0.000362465	+	HNRNPA3	Heterogeneous nuclear ribonucleoprotein A3	P51991;P51991-2;E7EWI9;E7ERJ4;H7C1J8	P51991	S	370;348;314;315;107	GyGsGGGsGGyGsrR	YGGGYGSGGGSGGYGSRRF__
0.507627	74995000	0.000364054	+	HTATSF1	HIV Tat-specific factor 1	O43719;E9PFP2	O43719	S	607;607	sEFEDDGsEKVLDEE	SENSEFEDDGSEKVLDEEGSE
0.506422	610250	0.000375994	+	NDE1	Nuclear distribution protein nudE homolog 1	Q9NXR1-2;Q9NXR1;I3L533;I3L2R9;I3L2R3;I3L522	Q9NXR1-2	S	211;211;18;65;31;91	TAVQATGsVPstPIA	RTDTAVQATGSVPSTPIAHRG
0.503473	332940000	0.000406786	+	MPHOSPH10	U3 small nucleolar ribonucleoprotein protein MPP10	C9JX83;O00566	C9JX83	S	167;307		AEEEAEELSISETDEDDDLQE
0.503473	332940000	0.000406786	+	MPHOSPH10	U3 small nucleolar ribonucleoprotein protein MPP10	C9JX83;O00566	C9JX83	T	169;309	EELSISEtDEDDDLQ	EEAEELSISETDEDDDLQENE
0.50053	4170900	0.000439854	+	TRIM2	Tripartite motif-containing protein 2	Q9C040	Q9C040	S	375	ELstPDGsVADGEIL	LTAELSTPDGSVADGEILDNK
0.50053	4170900	0.000439854	+	TRIM2	Tripartite motif-containing protein 2	Q9C040	Q9C040	T	371	YLTAELstPDGsVAD	GNAYLTAELSTPDGSVADGEI
0.499397	3570600	0.00045324	+	SPAG9	C-Jun-amino-terminal kinase-interacting protein 4	O60271-3;O60271;O60271-5;O60271-4;O60271-2;H7BYB5;O60271-9;H7BY20;H7BY21;F5H7U6;H0Y981;H0YBS5	O60271-3	S	932;932;918;918;922;689;775;469;679;530;105;176		PLGVQIPEDLSPVYQSRYNNG
0.499249	936800	0.000455026	+	TMPO	Lamina-associated polypeptide 2, isoforms beta/gamma;Thymopoietin;Thymopentin	P42167;G5E972;H0YJH7	P42167	S	306;266;141	tGNFkHAsPILPItE	NRVTGNFKHASPILPITEFSD
0.499068	27827000	0.000457198	+	RPRD2	Regulation of nuclear pre-mRNA domain-containing protein 2	B4E2Q6;Q5VT52-2;Q5VT52-3;Q5VT52	B4E2Q6;Q5VT52-2	S	639;628;639;665	KLEsEstsPsLEMkI	SKPKLESESTSPSLEMKIHNF
0.497454	126370000	0.000477087	+	BAG4	BAG family molecular chaperone regulator 4	H0YBT1;O95429-2;O95429	H0YBT1	S	26;143;179	TYRsSGNsPtPVsrW	VPSTYRSSGNSPTPVSRWIYP
0.496892	73500000	0.000484202	+	ADAR	Double-stranded RNA-specific adenosine deaminase	E7ENU4;P55265-5;P55265;P55265-4	E7ENU4	S	868;530;825;868	tMLLLsRsPEAQPKT	LRRTMLLLSRSPEAQPKTLPL
0.49643	34383000	0.000490118	+	RALGPS2	Ras-specific guanine nucleotide-releasing factor RalGPS2	H7C2H2;Q86X27	H7C2H2	S	67;329	LLPQtPPsPRNLIPH	EGALLPQTPPSPRNLIPHGHR
0.493994	6041100	0.000522477	+	PSMB2	Proteasome subunit beta type-2	P49721	P49721	T	78		KMRNGYELSPTAAANFTRRNL
0.493934	591820000	0.0005233	+	EEF2	Elongation factor 2	P13639;B4DPU3;F5H370;B4DMC6	P13639	T	57;57;57;57	RAGEtRFtDtRkDEQ	ASARAGETRFTDTRKDEQERC
0.488747	963750	0.000599037	+	MAP1A	Microtubule-associated protein 1A;MAP1A heavy chain;MAP1 light chain LC2	E9PGC8;P78559;P78559-2	E9PGC8	S	2141;1903;1903	ELEGGPysPLGKDyR	GAAELEGGPYSPLGKDYRKAE
0.485758	1183300	0.000647189	+	TP73	Tumor protein p73	O15350-4;O15350-10;O15350-9;O15350-3;O15350-2;O15350-6;O15350-5;C9J521;B7Z7J4;O15350-8;O15350	O15350-4	S	97;48;48;97;97;97;97;97;26;48;97		PEHAASVPTHSPYAQPSSTFD
0.485166	53106000	0.000657148	+	SRSF7	Serine/arginine-rich splicing factor 7	C9JAB2;G5E9M3;Q16629;H7C1N1;H7BZZ6	C9JAB2	S	165;165;165;24;49	AsPRRsRsIsLRRsR	SRSASPRRSRSISLRRSRSAS
0.485166	53106000	0.000657148	+	SRSF7	Serine/arginine-rich splicing factor 7	C9JAB2;G5E9M3;Q16629;H7C1N1;H7BZZ6	C9JAB2	S	167;167;167;26;51	PRRsRsIsLRRsRsA	SASPRRSRSISLRRSRSASLR
0.485166	53106000	0.000657148	+	SRSF7	Serine/arginine-rich splicing factor 7	C9JAB2;G5E9M3;Q16629;H7C1N1;H7BZZ6	C9JAB2	S	171;171;171;30;55	RsIsLRRsRsAsLRR	RRSRSISLRRSRSASLRRSRS
0.48035	14866000	0.000743569	+	ST13;ST13P4	Hsc70-interacting protein;Putative protein FAM10A4	P50502;F6VDH7;Q3KNR6;Q8IZP2;F5H3M7	P50502	S	76;39;76;72;76	LKADEPssEEsDLEI	EEDLKADEPSSEESDLEIDKE
0.479629	8964200	0.000757401	+	RBM14	RNA-binding protein 14	Q96PK6	Q96PK6	S	520	AAPYRtQssAsLAAs	ATLAAPYRTQSSASLAASYAA
0.479629	8964200	0.000757401	+	RBM14	RNA-binding protein 14	Q96PK6	Q96PK6	S	521	APYRtQssAsLAAsy	TLAAPYRTQSSASLAASYAAQ
0.478215	9895200	0.000785174	+	GAPVD1	GTPase-activating protein and VPS9 domain-containing protein 1	Q14C86-2;Q14C86-6;Q14C86-5;Q14C86;Q14C86-4	Q14C86-2;Q14C86-4	S	1019;1046;993;1019;998	StLtDDPsPRLsAQA	DRFSTLTDDPSPRLSAQAQVA
0.477138	2051200	0.000806983	+	MIER3	Mesoderm induction early response protein 3	A8MQD4;Q7Z3K6-5;Q7Z3K6-3;Q7Z3K6;Q7Z3K6-2	A8MQD4	S	25;52;52;52;57	MDEGKNFssEIEDLE	EEMMDEGKNFSSEIEDLEKEG
0.477138	2051200	0.000806983	+	MIER3	Mesoderm induction early response protein 3	A8MQD4;Q7Z3K6-5;Q7Z3K6-3;Q7Z3K6;Q7Z3K6-2	A8MQD4	S	26;53;53;53;58	DEGKNFssEIEDLEK	EMMDEGKNFSSEIEDLEKEGT
0.474379	35360000	0.000865405	+	HNRNPA3	Heterogeneous nuclear ribonucleoprotein A3	P51991;P51991-2;E7EWI9;E7ERJ4;H7C1J8	P51991	S	366;344;310;311;103	PyGGGyGsGGGsGGy	SGSPYGGGYGSGGGSGGYGSR
0.47343	3722100	0.000886389	+	GGA3	ADP-ribosylation factor-binding protein GGA3	B7Z456;G3V1K5;Q9NZ52-2;Q9NZ52	B7Z456	S	437;487;526;559	PFSTGPGsPLFQPLS	PLLPFSTGPGSPLFQPLSFQS
0.464561	227280000	0.00110659	+	ATXN2L	Ataxin-2-like protein	Q8WWM7-6;Q8WWM7-5;Q8WWM7-4;A8K1R6;Q8WWM7-2;Q63ZY4;Q8WWM7;Q8WWM7-3;H3BUF6;H3BSK9;C9JXV8;Q8WWM7-7	Q8WWM7-6	S	306;306;306;306;306;306;306;306;306;246;306;306	LAREIEssPQyRLRI	AAQLAREIESSPQYRLRIAME
0.464116	16029000	0.00111888	+	SRRM2		I3L4D8	I3L4D8	S	1014		PPGPSLSGSKSPCPQ______
0.463035	939520	0.00114924	+	GTF3C1	General transcription factor 3C polypeptide 1	Q12789;Q12789-3;H7BYG6	Q12789	S	465;465;463		TVSLASMQEESLLPEGEDTFL
0.463035	939520	0.00114924	+	GTF3C1	General transcription factor 3C polypeptide 1	Q12789;Q12789-3;H7BYG6	Q12789	S	476;476;474		LLPEGEDTFLSESDSEEERSS
0.463035	939520	0.00114924	+	GTF3C1	General transcription factor 3C polypeptide 1	Q12789;Q12789-3;H7BYG6	Q12789	S	478;478;476	EDTFLSEsDsEEERS	PEGEDTFLSESDSEEERSSSK
0.463035	939520	0.00114924	+	GTF3C1	General transcription factor 3C polypeptide 1	Q12789;Q12789-3;H7BYG6	Q12789	S	480;480;478	TFLSEsDsEEERSSS	GEDTFLSESDSEEERSSSKRR
0.463035	939520	0.00114924	+	GTF3C1	General transcription factor 3C polypeptide 1	Q12789;Q12789-3;H7BYG6	Q12789	T	473;473;471		EESLLPEGEDTFLSESDSEEE
0.462217	1011800000	0.00117271	+	TRA2B	Transformer-2 protein homolog beta	P62995	P62995	S	97	YRRRHsHsHsPMstR	SRDYRRRHSHSHSPMSTRRRH
0.460195	3285300	0.00123269	+	KMT2D	Histone-lysine N-methyltransferase 2D	O14686;O14686-3	O14686	S	1229;1229		SFPGSEPLLGSPDPEGGGSLS
0.459521	4926400	0.00125327	+	RBM14	RNA-binding protein 14	Q96PK6	Q96PK6	T	518	TLAAPYRtQssAsLA	PSATLAAPYRTQSSASLAASY
0.458766	1586800	0.00127674	+	PELP1	Proline-, glutamic acid- and leucine-rich protein 1	E7EV54;I3L3A8;C9JFV4;Q8IZL8;Q8IZL8-2	E7EV54	S	511;708;802;658;803	VPPPEAPsPFRAPPF	PAPVPPPEAPSPFRAPPFHPP
0.454805	3354100	0.00140658	+	TBC1D17	TBC1 domain family member 17	F5H1W7;Q9HA65	F5H1W7	S	569;602	APPAEPHsPsPtAsP	LGLAPPAEPHSPSPTASPLPL
0.454805	3354100	0.00140658	+	TBC1D17	TBC1 domain family member 17	F5H1W7;Q9HA65	F5H1W7	S	571;604	PAEPHsPsPtAsPLP	LAPPAEPHSPSPTASPLPLSP
0.454805	3354100	0.00140658	+	TBC1D17	TBC1 domain family member 17	F5H1W7;Q9HA65	F5H1W7	T	573;606	EPHsPsPtAsPLPLs	PPAEPHSPSPTASPLPLSPTR
0.451678	106640000	0.00151758	+	SRRM2	Serine/arginine repetitive matrix protein 2	I3L4D8;I3L182;Q9UQ39;I3L1I8;Q9UQ35-3;Q9UQ35;Q9UQ35-2;I3L2L6	I3L4D8;Q9UQ35	S	222;126;187;126;126;222;222;222	KKKHRsEsEsKKRKH	SSKKKKHRSESESKKRKHRSP
0.450323	38542000	0.00156815	+	YWHAZ	14-3-3 protein zeta/delta	P63104;E7EX29;B7Z2E6;H0YB80;B0AZS6;E7EX24	P63104	S	207;215;87;92;130;132	IAELDtLsEEsykDs	DEAIAELDTLSEESYKDSTLI
0.448807	70009000	0.00162656	+	SMN2;SMN1	Survival motor neuron protein	B4DP61;E7EQZ4;Q16637-4;Q16637-2;Q16637-3;Q16637	B4DP61	T	25;25;25;25;25;25	sVLFRRGtGQsDDsD	QEDSVLFRRGTGQSDDSDIWD
0.448756	599830	0.00162854	+	ESRRA	Steroid hormone receptor ERR1	F5GWT5;P11474-2;P11474	F5GWT5	S	2;2;2		_________MSSQVVGIEPLY
0.448756	599830	0.00162854	+	ESRRA	Steroid hormone receptor ERR1	F5GWT5;P11474-2;P11474	F5GWT5	S	3;3;3		________MSSQVVGIEPLYI
0.446486	1650700	0.00171987	+	WAC	WW domain-containing adapter protein with coiled-coil	C9JMU2;C9JVK6;C9JD58;B4DMH1;Q9BTA9-3	C9JMU2	S	51;51;51;51;51		VRERDGGTSYSPQENSHNH__
0.446145	1431900	0.00173397	+	RIOK2	Serine/threonine-protein kinase RIO2	Q9BVS4;H0Y8R4	Q9BVS4	S	542;149		QRRENMQNIKSSLEAASFWGE
0.446145	1431900	0.00173397	+	RIOK2	Serine/threonine-protein kinase RIO2	Q9BVS4;H0Y8R4	Q9BVS4	S	543;150		RRENMQNIKSSLEAASFWGE_
0.445726	2682500	0.00175144	+	ZFP36L1	Zinc finger protein 36, C3H1 type-like 1	B4E1N3;Q07352	B4E1N3	S	256;273		APSMGLPGGGSPTTFLFRPMS
0.445468	4539000	0.00176231	+	FOXK1	Forkhead box protein K1	P85037;F5H8G8;P85037-2	P85037	S	223;106;60	RPLyPQIsPLKIHIP	SPLRPLYPQISPLKIHIPEPD
0.445312	19097000	0.00176892	+	BARD1	BRCA1-associated RING domain protein 1	E7EUI3;Q99728	E7EUI3	S	247;391	SDEFISLsPGtPPSt	SNMSDEFISLSPGTPPSTLSS
0.443504	8629200	0.00184693		CNNM4	Metal transporter CNNM4	Q6P4Q7	Q6P4Q7	T	94		GNISSNLISFTEVDDAETLHK
0.443504	8629200	0.00184693		CNNM4	Metal transporter CNNM4	Q6P4Q7	Q6P4Q7	T	101		ISFTEVDDAETLHKSTSCLEL
0.439771	7031000	0.00201822		EML4	Echinoderm microtubule-associated protein-like 4	B5MBZ0;Q9HC35;B5MCW9;F2Z2B5	B5MBZ0	S	929;918;860;182		ETAEEESRISSSPTLLENSLE
0.439205	123510000	0.0020454		ZBTB21	Zinc finger and BTB domain-containing protein 21	Q9ULJ3-2;Q9ULJ3	Q9ULJ3-2	S	411;411	PHRLRsFsAsQStDR	VLQPHRLRSFSASQSTDREGA
0.439205	46061000	0.0020454		ZBTB21	Zinc finger and BTB domain-containing protein 21	Q9ULJ3-2;Q9ULJ3	Q9ULJ3-2	S	422;422	StDREGAsPVTEVRI	ASQSTDREGASPVTEVRIKTE
0.433616	42643000	0.00233265		RBMX;RBMXL1	RNA-binding motif protein, X chromosome;RNA-binding motif protein, X chromosome, N-terminally processed;RNA binding motif protein, X-linked-like-1	P38159-2;P38159;B3KRG5;H3BUY5;H0Y6E7;H3BT71;Q96E39	P38159-2;Q96E39	S	264;277;142;149;279;277;277	RDysDHPsGGsyRDs	GRDRDYSDHPSGGSYRDSYES
0.433125	392380000	0.0023596		PCBP1	Poly(rC)-binding protein 1	Q15365	Q15365	S	264	FAGIdsssPEVKGyW	GTGFAGIDSSSPEVKGYWASL
0.429646	1752100	0.00255862		ZNF638	Zinc finger protein 638	Q14966-3;Q14966;E7EUZ3;Q14966-5	Q14966-3	S	1743;1743;683;840		LVTVDEIQDDSSDLHLVTLDE
0.429646	21726000	0.00255862		ZNF638	Zinc finger protein 638	Q14966-3;Q14966;E7EUZ3;Q14966-5	Q14966-3	S	1744;1744;684;841		VTVDEIQDDSSDLHLVTLDEV
0.429199	1531200	0.00258529		SRRM2	Serine/arginine repetitive matrix protein 2	I3L4D8;I3L182;Q9UQ39;I3L1I8;Q9UQ35-3;Q9UQ35;Q9UQ35-2;I3L2L6	I3L4D8;Q9UQ35	T	288;192;253;192;192;288;288;288	SAAAKtHttALAGRs	RSRSAAAKTHTTALAGRSPSP
0.428929	1842000	0.00260151		CCDC94	Coiled-coil domain-containing protein 94	Q9BW85	Q9BW85	S	308	tPGAssLsQLGAYLD	TPLTPGASSLSQLGAYLDSDD
0.428105	822980	0.00265161		MSANTD4	Myb/SANT-like DNA-binding domain-containing protein 4	E9PLV2;Q8NCY6	E9PLV2	S	101;101		LVGSGFPLPSSDLDDSLTEEI
0.428105	822980	0.00265161		MSANTD4	Myb/SANT-like DNA-binding domain-containing protein 4	E9PLV2;Q8NCY6	E9PLV2	S	106;106	PSSDLDDsLTEEIDE	FPLPSSDLDDSLTEEIDEKIG
0.427587	919130	0.00268361		NME1	Nucleoside diphosphate kinase A	P15531;P15531-2	P15531	S	122;147	NIIhGsDsVEsAEKE	VGRNIIHGSDSVESAEKEIGL
0.42758	61863000	0.00268402		KRR1	KRR1 small subunit processome component homolog	Q13601-2;Q13601	Q13601-2	S	3;3	_____MAsPsLERPE	________MASPSLERPEKGA
0.422818	2258300	0.00299462		PACS1	Phosphofurin acidic cluster sorting protein 1	B4DF77;Q6VY07;Q6VY07-2	B4DF77	S	347;811;811		SMSSALAIVGSPNSPYGDVIG
0.422791	15084000	0.00299645		DAP	Death-associated protein 1	P51397;B4DQ75	P51397	S	2;2	______MssPPEGkL	_________MSSPPEGKLETK
0.422791	15084000	0.00299645		DAP	Death-associated protein 1	P51397;B4DQ75	P51397	S	3;3	_____MssPPEGkLE	________MSSPPEGKLETKA
0.421479	9105700	0.00308769		ELP2	Elongator complex protein 2	Q6IA86-4	Q6IA86-4	S	681		VETKRWLSGVSATPLMTVLST
0.421479	9105700	0.00308769		ELP2	Elongator complex protein 2	Q6IA86-4	Q6IA86-4	T	683		TKRWLSGVSATPLMTVLSTTL
0.421479	9105700	0.00308769		ELP2	Elongator complex protein 2	Q6IA86-4	Q6IA86-4	T	687		LSGVSATPLMTVLSTTLAPAP
0.420075	39235000	0.00318808		NCOA3	Nuclear receptor coactivator 3	C9JCR8;Q9Y6Q9-4;Q9Y6Q9-2;Q9Y6Q9-3;Q9Y6Q9-5;Q9Y6Q9	C9JCR8	S	738;738;728;738;728;728	VVkQEQLsPKKKENN	DGNVVKQEQLSPKKKENNALL
0.419408	18987000	0.00323686		RNF20	E3 ubiquitin-protein ligase BRE1A	Q5VTR2	Q5VTR2	S	524	sALLQsQsstEDPKD	RSGSALLQSQSSTEDPKDEPA
0.4192	2008100	0.00325219		PUF60	Poly(U)-binding-splicing factor PUF60	E9PL19;H0YEM1;Q9UHX1-3;Q9UHX1-5;Q9UHX1	E9PL19	S	149;110;69;83;112	MGFGDPLsPLQsMAA	AVTMGFGDPLSPLQSMAAQRQ
0.418509	6524900	0.00330365		USP9X	Probable ubiquitin carboxyl-terminal hydrolase FAF-X	Q93008-1;Q93008	Q93008-1	S	2502;2518		PPEDAPLYPHSPGSQYQQNNH
0.417387	15516000	0.0033887		MAML1	Mastermind-like protein 1	Q92585	Q92585	S	45	EARYEAVsPERLELE	STCEARYEAVSPERLELERQH
0.414398	11311000	0.00362517		MAPKAP1	Target of rapamycin complex 2 subunit MAPKAP1	B1AMB1;F8W6C7;Q9BPZ7-5;Q9BPZ7-6;Q9BPZ7-3;Q9BPZ7-2;Q9BPZ7	B1AMB1	S	69;24;69;69;69;69;69		GETQGYVYAQSVDITSSWDFG
0.413612	1091700	0.00368978		USP10	Ubiquitin carboxyl-terminal hydrolase 10	Q14694;Q14694-3;Q14694-2	Q14694	S	365;369;413	AyVETKysPPAIsPL	SPVAYVETKYSPPAISPLVSE
0.413612	1091700	0.00368978		USP10	Ubiquitin carboxyl-terminal hydrolase 10	Q14694;Q14694-3;Q14694-2	Q14694	S	370;374;418	KysPPAIsPLVSEKQ	VETKYSPPAISPLVSEKQVEV
0.411388	104690000	0.00387837		PRRC2B	Protein PRRC2B	Q5JSZ5;Q5JSZ5-5;Q5JT00	Q5JSZ5	S	613;613;153	EEAREAGsPAQEFKY	SSEEEAREAGSPAQEFKYQKS
0.409163	2511000	0.00407585		QKI	Protein quaking	F5GXS8;F5GYM3;H0YGD6;H0YG47;Q96PU8-5;Q96PU8-9;Q96PU8-8;Q96PU8-6;Q96PU8-3;Q96PU8	F5GXS8	S	133;133;22;85;188;188;188;188;188;188	PAAEGEDsLKKMQLM	LLVPAAEGEDSLKKMQLMELA
0.408829	1514100	0.00410624		RBMS1	RNA-binding motif, single-stranded-interacting protein 1	E7ETU5;B4DN88;P29558-2;P29558	E7ETU5	S	302;351;335;338		TMSLQPASMISPLAQQMSHLS
0.40876	4733300	0.00411251		EIF3C;EIF3CL	Eukaryotic translation initiation factor 3 subunit C;Eukaryotic translation initiation factor 3 subunit C-like protein	B4DVQ5;F5H4V1;H3BRV0;Q99613;B5ME19	B4DVQ5	S	207;207;212;222;222		LKKMDDEDEDSEDSEDDEDWD
0.40876	4733300	0.00411251		EIF3C;EIF3CL	Eukaryotic translation initiation factor 3 subunit C;Eukaryotic translation initiation factor 3 subunit C-like protein	B4DVQ5;F5H4V1;H3BRV0;Q99613;B5ME19	B4DVQ5	S	210;210;215;225;225		MDDEDEDSEDSEDDEDWDTGS
0.408732	1307800	0.00411504		CCDC8	Coiled-coil domain-containing protein 8	Q9H0W5;F5GX02	Q9H0W5	S	142;142	LGSKFLGsDLEsEDD	VSYLGSKFLGSDLESEDDEEL
0.408732	1307800	0.00411504		CCDC8	Coiled-coil domain-containing protein 8	Q9H0W5;F5GX02	Q9H0W5	S	146;146	FLGsDLEsEDDEELV	GSKFLGSDLESEDDEELVEAF
0.405643	2694300	0.00440673		C16orf72	UPF0472 protein C16orf72	Q14CZ0	Q14CZ0	S	167	PPRLTVVsPNRATST	SRAPPRLTVVSPNRATSTETS
0.404436	6493000	0.00452574		PCM1	Pericentriolar material 1 protein	E7ETA6;Q15154-2;Q15154;E7EV56;A6NNN6;H0YBA1	E7ETA6	S	1497;1442;1497;1443;196;237	ADNASVLsVSSNFEP	QNDADNASVLSVSSNFEPFAT
0.404436	7456400	0.00452574		PCM1	Pericentriolar material 1 protein	E7ETA6;Q15154-2;Q15154;E7EV56;A6NNN6;H0YBA1	E7ETA6	S	1500;1445;1500;1446;199;240		ADNASVLSVSSNFEPFATDDL
0.40167	761890000	0.00480951		SRRM2	Serine/arginine repetitive matrix protein 2	Q9UQ35;Q9UQ35-2;I3L2L6;F5GWZ7	Q9UQ35	S	1103;1103;1103;355	GGRsRsssPVtELAs	SPKGGRSRSSSPVTELASRSP
0.401144	16814000	0.00486519		DPF2	Zinc finger protein ubi-d4	B4DT58;Q92785	B4DT58	S	142;142	DPRVDDDsLGEFPVT	GAPDPRVDDDSLGEFPVTNSR
0.401058	1066000000	0.00487434		MARCKSL1	MARCKS-related protein	P49006	P49006	S	22	AEEAAGAsPAkANGQ	DVTAEEAAGASPAKANGQENG
0.400834	4424200	0.00489831		DHX57	Putative ATP-dependent RNA helicase DHX57	F8W801;F8WAZ3;Q6P158-3;Q6P158-2;Q6P158	F8W801	S	373;373;373;475;475	IPEVEKAsEsEEsDE	SNQIPEVEKASESEESDEDDG
0.400834	4424200	0.00489831		DHX57	Putative ATP-dependent RNA helicase DHX57	F8W801;F8WAZ3;Q6P158-3;Q6P158-2;Q6P158	F8W801	S	375;375;375;477;477	EVEKAsEsEEsDEDD	QIPEVEKASESEESDEDDGPA
0.400834	4424200	0.00489831		DHX57	Putative ATP-dependent RNA helicase DHX57	F8W801;F8WAZ3;Q6P158-3;Q6P158-2;Q6P158	F8W801	S	378;378;378;480;480	KAsEsEEsDEDDGPA	EVEKASESEESDEDDGPAPVI
0.399938	2358100	0.00499524		EEF2	Elongation factor 2	P13639;B4DPU3;F5H370;B4DMC6	P13639	T	59;59;59;59	GEtRFtDtRkDEQER	ARAGETRFTDTRKDEQERCIT
0.397963	82991000	0.00521495		AP3B1	AP-3 complex subunit beta-1	F5GXG9;E5RJ68;O00203;F5H093	F5GXG9	S	276;227;276;180	NGKNFyEsDDDQKEK	LEDNGKNFYESDDDQKEKTDK
0.397072	4732800	0.00531687		AAK1	AP2-associated protein kinase 1	Q2M2I8-2;Q2M2I8;E9PG46	Q2M2I8-2	S	618;618;618	VQGQKVGsLtPPssP	PPAVQGQKVGSLTPPSSPKTQ
0.397072	4732800	0.00531687		AAK1	AP2-associated protein kinase 1	Q2M2I8-2;Q2M2I8;E9PG46	Q2M2I8-2	S	623;623;623	VGsLtPPssPKtQRA	GQKVGSLTPPSSPKTQRAGHR
0.397072	87505000	0.00531687		AAK1	AP2-associated protein kinase 1	Q2M2I8-2;Q2M2I8;E9PG46	Q2M2I8-2	T	620;620;620	GQKVGsLtPPssPKt	AVQGQKVGSLTPPSSPKTQRA
0.39653	2570300	0.00537972		HUWE1	E3 ubiquitin-protein ligase HUWE1	H0Y5W0;Q7Z6Z7-2;Q7Z6Z7-3;Q7Z6Z7;H0Y659	H0Y5W0;H0Y659	T	2958;3908;3915;3924;747	PLsPAPLtPAtPssL	EPPPLSPAPLTPATPSSLDPF
0.395891	70892000	0.00545473		TRIM28	Transcription intermediary factor 1-beta	Q13263-2;Q13263	Q13263-2	S	355;437	GPLSkQGsGssQPME	RAPGPLSKQGSGSSQPMEVQE
0.3951	12890000	0.00554895		USP1	Ubiquitin carboxyl-terminal hydrolase 1	C9JWX4;C9JC88;O94782	C9JWX4	S	42;42;42	RALDFTDsQENEEKA	ETKRALDFTDSQENEEKASEY
0.394013	862450000	0.00568064		HNRNPK	Heterogeneous nuclear ribonucleoprotein K	B4DFF1;P61978;P61978-2;P61978-3;Q5T6W5;Q5T6W2;Q5T6W1	B4DFF1	S	279;284;284;260;249;260;215	rRDyDDMsPrRGPPP;RRDYDDMsPRRGPPP	PPSRRDYDDMSPRRGPPPPPP
0.392832	783070	0.00582709		LIN52	Protein lin-52 homolog	G3V5T8;Q52LA3	G3V5T8	S	62;53	FKsPITssPPKWMAE	AASFKSPITSSPPKWMAEIER
0.39213	2895500	0.00591569		DNTTIP2	Deoxynucleotidyltransferase terminal-interacting protein 2	Q5QJE6;E9PRB3	Q5QJE6	T	87;94	EPstDGEtsEAEsNy	KGTEPSTDGETSEAESNYSVS
0.39165	95636000	0.00597694		HDGF	Hepatoma-derived growth factor	A8K8G0;Q5SZ08;P51858;Q5SZ07;B7Z525	A8K8G0	S	133;158;165;181;188	AGDLLEDsPKRPKEA	KRRAGDLLEDSPKRPKEAENP
0.389977	9067200	0.00619513		PRRC2A	Protein PRRC2A	P48634;F8W1J3;F8VVQ5;F8VVM9;A6NG23;C9JTM3;C9JB33;C9J9U2;C9J6L0;C9J1F6;C9JXZ3;C9JTL3;C9JI93;C9JI26;C9JD87;P48634-2;P48634-3;P48634-4	P48634	S	2113;1338;1338;1338;1338;2094;2094;2094;2094;2094;2105;2105;2105;2105;2105;2100;2112;1489	VDLyQQAsPPDALRW	TQRVDLYQQASPPDALRWIPK
0.38994	2110000	0.00619993		RBM12B	RNA-binding protein 12B	Q8IXT5;B9ZVT1	Q8IXT5	S	874;754	PPGEDFRsPPDDFRS	NFRPPGEDFRSPPDDFRSHRP
0.389492	31245000	0.00625961		AMOT	Angiomotin	E7ERM3;Q4VCS5;A6NP16	E7ERM3	S	93;325;93		TSGGSLPLLQSPPSTRLSPAR
0.389492	31245000	0.00625961		AMOT	Angiomotin	E7ERM3;Q4VCS5;A6NP16	E7ERM3	S	100;332;100		LLQSPPSTRLSPARHPLVPNQ
0.386499	156670000	0.00667157		HNRNPA2B1	Heterogeneous nuclear ribonucleoproteins A2/B1	P22626-2;P22626	P22626-2	S	332;344	GPGGsGGsGGyGGrs	GNYGPGGSGGSGGYGGRSRY_
0.385537	2586100	0.00680902		UBA5	Ubiquitin-like modifier-activating enzyme 5	E7EQ61;Q9GZZ9-2;Q9GZZ9	E7EQ61	S	358;302;358	EEELKNFsGPVPDLP	EVSEEELKNFSGPVPDLPEGI
0.385118	21162000	0.00686979				F6S0W8	F6S0W8	S	275		LCSLFPKSAVSSAQASTNRKG
0.385118	21162000	0.00686979				F6S0W8	F6S0W8	S	276		CSLFPKSAVSSAQASTNRKGL
0.385118	21162000	0.00686979				F6S0W8	F6S0W8	T	281		KSAVSSAQASTNRKGLSDVLV
0.384071	1795800	0.00702341		NUP35	Nucleoporin NUP53	C9IYQ7;F8WCF5;F8WEL4;B4DYB4;Q8NFH5	C9IYQ7	S	82;99;99;82;99	RsIyDDIssPGLGst	PPVRSIYDDISSPGLGSTPLT
0.384071	1795800	0.00702341		NUP35	Nucleoporin NUP53	C9IYQ7;F8WCF5;F8WEL4;B4DYB4;Q8NFH5	C9IYQ7	S	83;100;100;83;100	sIyDDIssPGLGstP	PVRSIYDDISSPGLGSTPLTS
0.384071	1795800	0.00702341		NUP35	Nucleoporin NUP53	C9IYQ7;F8WCF5;F8WEL4;B4DYB4;Q8NFH5	C9IYQ7	T	89;106;106;89;106	ssPGLGstPLtsRRQ	DDISSPGLGSTPLTSRRQPNI
0.38315	8316500	0.00716124		KIAA1522	Uncharacterized protein KIAA1522	Q9P206;Q9P206-3;Q9P206-2	Q9P206	S	862;873;921	RALsGRAsPVPAPsS	PLRRALSGRASPVPAPSSGLH
0.382408	70699000	0.00727407		SEC62	Translocation protein SEC62	Q99442;F5H501;B4DGB0	Q99442	T	375;99;99	KEELEQQtDGDCEED	MITKEELEQQTDGDCEEDEEE
0.380784	1876100	0.00752641		KMT2D	Histone-lysine N-methyltransferase 2D	O14686;O14686-3	O14686	S	3620;3623	HSAVLALsPSQsPRL	QQQHSAVLALSPSQSPRLLTK
0.379633	101010000	0.00771003		MYH10	Myosin-10	F8W6L6;P35580;P35580-2;P35580-3;F8VTL3	F8W6L6	S	1968;1952;1968;1973;1983	QLHLEGAsLELsDDD	GRRQLHLEGASLELSDDDTES
0.378973	1213500	0.00781711		RBM14	RNA-binding protein 14	Q96PK6	Q96PK6	S	278	AsyrAQPsVsLGAPy	AQAASYRAQPSVSLGAPYRGQ
0.378501	19225000	0.00789452		TPT1	Translationally-controlled tumor protein	E9PJF7;Q8TBK7;P13693	E9PJF7	S	45;12;46	TEGNIDDsLIGGNAs	VSRTEGNIDDSLIGGNASAEG
0.378312	72045000	0.00792567		HTATSF1	HIV Tat-specific factor 1	O43719;E9PFP2	O43719	S	702;668	KLFEDDDsNEKLFDE	ADEKLFEDDDSNEKLFDEEED
0.378144	3220700	0.00795346		POLR2A	DNA-directed RNA polymerase II subunit RPB1	P24928	P24928	S	1571		YSPAWSPTPGSPGSPGPSSPY
0.377582	10058000	0.00804724		NUMB	Protein numb homolog	G3V3Z8;B1P2N8;B1P2N7;B1P2N6;B1P2N5;P49757-4;P49757-2;P49757-3;P49757	G3V3Z8	S	281;219;230;268;279;366;377;414;425	GQSSGAAsPGLFQAG	TEWGQSSGAASPGLFQAGHRR
0.377215	2243500	0.00810881		PRKAB1	5'-AMP-activated protein kinase subunit beta-1	B4DVP2;Q9Y478;F5H4Y8	B4DVP2	S	3;40;40		________MDSPEDADLFHSE
0.376243	3514200	0.00827441		CHD4	Chromodomain-helicase-DNA-binding protein 4	Q14839;Q14839-2;F5GWX5;F5H6N4;F5H596	Q14839	S	12;12;12;12;12		ASGLGSPSPCSAGSEEEDMDA
0.376243	3514200	0.00827441		CHD4	Chromodomain-helicase-DNA-binding protein 4	Q14839;Q14839-2;F5GWX5;F5H6N4;F5H596	Q14839	S	15;15;15;15;15		LGSPSPCSAGSEEEDMDALLN
0.376132	4439000	0.00829343		BCL2L12	Bcl-2-like protein 12	Q9HB09-3;Q9HB09	Q9HB09-3	S	272;273	CPGPPPPsPEPLARL	SRACPGPPPPSPEPLARLALA
0.374792	13869000	0.00852696		RBMX;RBMXL1	RNA-binding motif protein, X chromosome;RNA-binding motif protein, X chromosome, N-terminally processed;RNA binding motif protein, X-linked-like-1	P38159-2;P38159;B3KRG5;H3BUY5;H0Y6E7;H3BT71;Q96E39	P38159-2;Q96E39	S	267;280;145;152;282;280;280	sDHPsGGsyRDsyEs	RDYSDHPSGGSYRDSYESYGN
0.374671	15791000	0.00854836		TFCP2;UBP1	Alpha-globin transcription factor CP2;Upstream-binding protein 1	F8VX55;Q12800-2;Q12800-3;Q12800-4;Q12800;C9JWL3;Q9NZI7-4;Q9NZI7	F8VX55	S	25;25;25;25;25;22;22;22		ESGLVQDFDASLSGIGQELGA
0.373421	19380000	0.00877205		MATR3	Matrin-3	D6REM6;A8MXP9;P43243;D6R991	D6REM6	S	208;208;208;208	DYDHGSRsQESGYYD;DyDHGsRsQEsGyyD	PVLDYDHGSRSQESGYYDRMD
0.373421	25419000	0.00877205		MATR3	Matrin-3	D6REM6;A8MXP9;P43243;D6R991	D6REM6	S	211;211;211;211	HGsRsQEsGyyDRMD	DYDHGSRSQESGYYDRMDYED
0.371658	2040200	0.00909626		C2CD5	C2 domain-containing protein 5	Q86YS7;B4DRN7;H0YFE9	Q86YS7	S	293;293;96	PLKNQtysFsPsKsY	PSTPLKNQTYSFSPSKSYSRQ
0.371593	8740300	0.00910857		MDH1	Malate dehydrogenase, cytoplasmic	B8ZZ51;B9A041;P40925-2;P40925;F5H098	B8ZZ51	S	168;209;244;333;351	sAFEFLssA______	EKESAFEFLSSA_________
0.369912	2373500	0.00942799		SETD1B	Histone-lysine N-methyltransferase SETD1B	Q9UPS6	Q9UPS6	S	211	VGELDAVsPIVNETL	TLPVGELDAVSPIVNETLQLS
0.369538	14742000	0.00950039		FAM168B	Myelin-associated neurite-outgrowth inhibitor	A1KXE4	A1KXE4	S	166		MSAGTLLTAHSPTPVAPHPVT
0.369205	12693000	0.00956546		AGAP3	Arf-GAP with GTPase, ANK repeat and PH domain-containing protein 3	Q96P47-4;H0Y873;E7ETI2;Q96P47;Q96P47-2	Q96P47-4	S	574;67;73;538;539	PKLDPPPsPHsNRKK	SSSPKLDPPPSPHSNRKKHRR
0.367419	7289200	0.00992027		ILF3	Interleukin enhancer-binding factor 3	Q12906;G5E9M5;C9JFV5;Q12906-5;Q12906-4;Q12906-3;Q12906-2;Q12906-6	Q12906;Q12906-2	S	190;190;190;190;190;190;190;190	VLAGEtLsVNDPPDV	MEKVLAGETLSVNDPPDVLDR
0.367319	2504100	0.00994051		SMG6	Telomerase-binding protein EST1A	Q86US8	Q86US8	S	484	LDtDDEVsPtsWGDS	LHFLDTDDEVSPTSWGDSRQA
0.367319	3422300	0.00994051		SMG6	Telomerase-binding protein EST1A	Q86US8	Q86US8	T	479	PQLHFLDtDDEVsPt	TQTPQLHFLDTDDEVSPTSWG
0.364156	44388000	0.0105993		NCAPH	Condensin complex subunit 2	C9J470;E9PHA2;Q15003;B4E189	C9J470	S	348;348;359;223		VFDINAEVDESDCGDFPDGSL
0.364124	8295500	0.010606		CLNS1A	Methylosome subunit pICln	P54105;E9PJF4	P54105	S	144;144	PDPEDEDsDDyDGEE	ALHPDPEDEDSDDYDGEEYDV
0.363647	144460000	0.0107089		HTATSF1	HIV Tat-specific factor 1	O43719;E9PFP2	O43719	S	714;680	FDEEEDssEKLFDDs	EKLFDEEEDSSEKLFDDSDER
0.363463	15559000	0.0107485		CHD1	Chromodomain-helicase-DNA-binding protein 1	O14646;O14646-2	O14646	S	252;252	DEEMKtDsDDLLEVC	YKEDEEMKTDSDDLLEVCGED
0.363463	15559000	0.0107485		CHD1	Chromodomain-helicase-DNA-binding protein 1	O14646;O14646-2	O14646	T	250;250	KEDEEMKtDsDDLLE	VSYKEDEEMKTDSDDLLEVCG
0.363332	1558800	0.0107771		IRS2	Insulin receptor substrate 2	Q9Y4H2	Q9Y4H2	S	577	GLRKRtysLttPARQ	LDRGLRKRTYSLTTPARQRPV
0.363244	37510000	0.0107962		AP3B1	AP-3 complex subunit beta-1	F5GXG9;E5RJ68;O00203	F5GXG9	S	750;701;750	NSKAKGKsDsEDGEK	AKRNSKAKGKSDSEDGEKENE
0.363244	37510000	0.0107962		AP3B1	AP-3 complex subunit beta-1	F5GXG9;E5RJ68;O00203	F5GXG9	S	752;703;752	KAKGKsDsEDGEKEN	RNSKAKGKSDSEDGEKENEKS
0.363044	1888600	0.0108399		IRS2	Insulin receptor substrate 2	Q9Y4H2	Q9Y4H2	S	772	DyLNVsPsDAVttGt	PNGDYLNVSPSDAVTTGTPPD
0.363044	1888600	0.0108399		IRS2	Insulin receptor substrate 2	Q9Y4H2	Q9Y4H2	T	779	sDAVttGtPPDFFSA	VSPSDAVTTGTPPDFFSAALH
0.360771	1282700	0.0113468		ARHGAP5	Rho GTPase-activating protein 5	H0YK04;Q13017-2;Q13017	H0YK04	S	80;1202;1202	sEEDPLLsPVEtWKG	HRGSEEDPLLSPVETWKGGID
0.360102	5368700	0.0115001		SLC38A1	Sodium-coupled neutral amino acid transporter 1	F8VX12;F8VX04;Q9H2H9	F8VX12	S	49;49;49	KFIsDREsRRsLtNs	INSKFISDRESRRSLTNSHLE
0.355466	3944200	0.012613		DHX29	ATP-dependent RNA helicase DHX29	Q7Z478	Q7Z478	S	529		DPEESWENLVSDEDFSALSLE
0.355104	29724000	0.0127037		CNOT4	CCR4-NOT transcription complex subunit 4	F8W7M0;O95628-2;O95628;O95628-8;O95628-4;O95628-7;E7ET38;F8VQP3;O95628-6;O95628-3	F8W7M0	S	432;429;432;429;432;432;429;432;432;415	VQDQPsLsPtsLQNS	ELSVQDQPSLSPTSLQNSSSH
0.354771	337990000	0.0127879		MLF2	Myeloid leukemia factor 2	Q15773	Q15773	S	238	AIQGPEDsPsRQsRR	PRLAIQGPEDSPSRQSRRYDW
0.354205	483200000	0.0129317		SF3A1	Splicing factor 3A subunit 1	F5H048;Q15459;H7C1L2;E9PAW1	F5H048	S	226;329;25;264	EVEMEVEsDEEDDKQ	ESEEVEMEVESDEEDDKQEKA
0.353486	127800000	0.0131167		LARP1	La-related protein 1	Q6PKG0;Q6PKG0-3	Q6PKG0	S	868;791	syGCtPQsLPKFQHP;sYGCtPQsLPKFQHP	TVGSYGCTPQSLPKFQHPSHE
0.353486	232540000	0.0131167		LARP1	La-related protein 1	Q6PKG0;Q6PKG0-3	Q6PKG0	T	865;788	tVGsyGCtPQsLPKF;tVGsYGCtPQsLPKF	GTPTVGSYGCTPQSLPKFQHP
0.353302	28741000	0.0131644		OSBPL8	Oxysterol-binding protein-related protein 8	E9PE68;Q9BZF1-2;Q9BZF1	E9PE68	S	765;792;807	PEPDIQdssGsEAQs	YSSPEPDIQDSSGSEAQSVKP
0.353302	28741000	0.0131644		OSBPL8	Oxysterol-binding protein-related protein 8	E9PE68;Q9BZF1-2;Q9BZF1	E9PE68	S	766;793;808	EPDIQdssGsEAQsV	SSPEPDIQDSSGSEAQSVKPS
0.353302	28741000	0.0131644		OSBPL8	Oxysterol-binding protein-related protein 8	E9PE68;Q9BZF1-2;Q9BZF1	E9PE68	S	768;795;810	DIQdssGsEAQsVkP	PEPDIQDSSGSEAQSVKPSTR
0.350715	9899700	0.0138515		BYSL	Bystin	Q13895;H7BY94	Q13895	S	167;58	tEVEtVMsEVsGFPM	EKQTEVETVMSEVSGFPMPQL
0.350715	9899700	0.0138515		BYSL	Bystin	Q13895;H7BY94	Q13895	S	170;61	EtVMsEVsGFPMPQL	TEVETVMSEVSGFPMPQLDPR
0.350715	3445900	0.0138515		BYSL	Bystin	Q13895;H7BY94	Q13895	T	164;55	EKQtEVEtVMsEVsG	KLTEKQTEVETVMSEVSGFPM
0.349763	36421000	0.0141121		FOXK2	Forkhead box protein K2	Q01167-2;Q01167;F5H5V5	Q01167-2	S	398;398;394	EsLsREGsPAPLEPE	QTPESLSREGSPAPLEPEPGA
0.349562	354760000	0.0141678		CDK13	Cyclin-dependent kinase 13	Q14004-2;Q14004	Q14004-2	S	340;340	QSLRsRKsPSPAGGG;QSLRsRKsPsPAGGG	RASQSLRSRKSPSPAGGGSSP
0.349562	354760000	0.0141678		CDK13	Cyclin-dependent kinase 13	Q14004-2;Q14004	Q14004-2	S	342;342	LRsRKsPsPAGGGss	SQSLRSRKSPSPAGGGSSPYS
0.349204	1216600	0.0142672		NF1	Neurofibromin;Neurofibromin truncated	B4DXH1;H0Y465;P21359-2;P21359	B4DXH1	S	553;2405;2739;2760		TSEESLLTPTSPYPPALQSQL
0.347814	1097300000	0.0146595		SRRM2	Serine/arginine repetitive matrix protein 2	Q9UQ35;Q9UQ35-2;I3L2L6;F5GWZ7	Q9UQ35	S	1854;1854;1854;1106	tsRKRsRsRtsPAPW	TPPTSRKRSRSRTSPAPWKRS
0.347814	909090000	0.0146595		SRRM2	Serine/arginine repetitive matrix protein 2	Q9UQ35;Q9UQ35-2;I3L2L6;F5GWZ7	Q9UQ35	S	1857;1857;1857;1109	KRsRsRtsPAPWKRs	TSRKRSRSRTSPAPWKRSRSR
0.347814	696300000	0.0146595		SRRM2	Serine/arginine repetitive matrix protein 2	Q9UQ35;Q9UQ35-2;I3L2L6;F5GWZ7	Q9UQ35	T	1856;1856;1856;1108	RKRsRsRtsPAPWKR	PTSRKRSRSRTSPAPWKRSRS
0.3475	1335300	0.0147493		ATXN2L	Ataxin-2-like protein	Q8WWM7-6;Q8WWM7-5;Q8WWM7-4;A8K1R6;Q8WWM7-2;Q63ZY4;Q8WWM7;Q8WWM7-3;H3BUF6;H3BSK9;C9JXV8;Q8WWM7-7	Q8WWM7-6	S	111;111;111;111;111;111;111;111;111;51;111;111	TGkGPPQsPVFEGVy	GQSTGKGPPQSPVFEGVYNNS
0.347023	15409000	0.0148867		GPRASP2	G-protein coupled receptor-associated sorting protein 2	Q96D09	Q96D09	S	226	SNESGFWsADETSTA	EEASNESGFWSADETSTASSF
0.346812	1245000	0.0149478		ASAP1	Arf-GAP with SH3 domain, ANK repeat and PH domain-containing protein 1	H0YBM4;H0YBF7;F8WBW0;Q9ULH1;Q9ULH1-2	H0YBM4	S	384;848;1030;1027;1030	KSHPLDLsPNVQsRD	VTLKSHPLDLSPNVQSRDAIQ
0.346138	696300000	0.0151448		SRRM2	Serine/arginine repetitive matrix protein 2	Q9UQ35;Q9UQ35-2;I3L2L6;F5GWZ7	Q9UQ35	T	1856;1856;1856;1108	RKRsRsRtsPAPWKR	PTSRKRSRSRTSPAPWKRSRS
0.34567	3448600	0.015283		MYO9A		H3BV44;B2RTY4-4	H3BV44	T	525;1746		RGTFADGEGDTEEDDYDDIIE
0.345407	5984200	0.0153608		PUM1	Pumilio homolog 1	Q5T1Z4;Q5T1Z8;Q14671-2;Q14671;E9PCJ0;H0YEH2;F5H3Q8	Q5T1Z4	S	228;264;228;228;228;245;228	MVEyVLSssPGDsCL	GVSMVEYVLSSSPGDSCLRKG
0.345136	6490000	0.0154419		PGRMC1	Membrane-associated progesterone receptor component 1	B7Z1L3;O00264	B7Z1L3	T	126;178	LkEGEEPtVysDEEE	GKLLKEGEEPTVYSDEEEPKD
0.344748	12157000	0.0155583		CLSPN	Claspin	E7ESG2;Q9HAW4-2;Q9HAW4-3;Q9HAW4;F5H7R3	E7ESG2	S	83;83;83;83;83	PEKTTyDsAEEENKE	NASPEKTTYDSAEEENKENLY
0.343183	807270	0.0160354		PIAS1	E3 SUMO-protein ligase PIAS1	O75925;B3KSY9;H3BSI8	O75925	S	106;108;106		QLTYDGHPASSPLLPVSLLGP
0.342674	495760000	0.0161932		NOLC1	Nucleolar and coiled-body phosphoprotein 1	Q14978;Q14978-3;Q14978-2	Q14978	S	563;564;573	NGKAAKNsEEEEEEK	TAQNGKAAKNSEEEEEEKKKA
0.342596	13263000	0.0162176		NFATC2IP	NFATC2-interacting protein	Q8NCF5	Q8NCF5	S	198	EFLDLDNsPLsPPsP	KKTEFLDLDNSPLSPPSPRTK
0.342596	13814000	0.0162176		NFATC2IP	NFATC2-interacting protein	Q8NCF5	Q8NCF5	S	204	NsPLsPPsPRTkSRT	DLDNSPLSPPSPRTKSRTHTR
0.342223	16982000	0.0163343		GPRASP2	G-protein coupled receptor-associated sorting protein 2	Q96D09	Q96D09	S	550		QESLLQPDQPSPEFTFQYDPS
0.341518	42643000	0.0165569		RBMX;RBMXL1	RNA-binding motif protein, X chromosome;RNA-binding motif protein, X chromosome, N-terminally processed;RNA binding motif protein, X-linked-like-1	P38159-2;P38159;B3KRG5;H3BUY5;H0Y6E7;H3BT71;Q96E39	P38159-2;Q96E39	S	264;277;142;149;279;277;277	RDysDHPsGGsyRDs	GRDRDYSDHPSGGSYRDSYES
0.341518	13869000	0.0165569		RBMX;RBMXL1	RNA-binding motif protein, X chromosome;RNA-binding motif protein, X chromosome, N-terminally processed;RNA binding motif protein, X-linked-like-1	P38159-2;P38159;B3KRG5;H3BUY5;H0Y6E7;H3BT71;Q96E39	P38159-2;Q96E39	S	267;280;145;152;282;280;280	sDHPsGGsyRDsyEs	RDYSDHPSGGSYRDSYESYGN
0.341432	158440000	0.0165845		WRNIP1	ATPase WRNIP1	B3KT25;Q96S55-2;Q96S55	B3KT25	S	92;92;92	tPtAAEssEGEGEEG	QPATPTAAESSEGEGEEGDDG
0.341424	1355100	0.016587		AMOT	Angiomotin	E7ERM3;Q4VCS5;Q4VCS5-2;E7EPV6	E7ERM3	S	615;847;438;87	TPsPVPPstPLLsAH	VPSTPSPVPPSTPLLSAHSKT
0.341131	77795000	0.0166804		HSP90AA1	Heat shock protein HSP 90-alpha	P07900;P07900-2;Q86U12;G3V2J8	P07900	S	231;353;52;162	kERDkEVsDDEAEEK	FVEKERDKEVSDDEAEEKEDK
0.34081	41754000	0.0167835		YWHAE	14-3-3 protein epsilon	P62258-2;P62258	P62258-2	S	188;210	IAELDtLsEEsyKDs	DDAIAELDTLSEESYKDSTLI
0.340524	121380000	0.0168757		PCM1	Pericentriolar material 1 protein	E7ETA6;Q15154-2;Q15154;E7EV56;E7EV93;C9JBL6;E9PGW9;Q15154-3;E5RGQ4	E7ETA6	S	65;65;65;65;65;65;65;65;65	kRVtNDIsPEssPGV	ESDKRVTNDISPESSPGVGRR
0.340281	19962000	0.0169541		DTL	Denticleless protein homolog	E7ERQ0;F5GZ90;Q9NZJ0	E7ERQ0	T	195;474;516	PsssPPItPPAsETK	TRTPSSSPPITPPASETKIMS
0.339942	3772500	0.0170646		FOXO3	Forkhead box protein O3	O43524;F5H7C9;B4DVZ6	O43524	S	299;79;79	PGsPtsRsSDELDAW	SKWPGSPTSRSSDELDAWTDF
0.339942	11284000	0.0170646		FOXO3	Forkhead box protein O3	O43524;F5H7C9;B4DVZ6	O43524	S	311;91;91	DAWtDFRsRTNsNAs	DELDAWTDFRSRTNSNASTVS
0.339586	20271000	0.017181		ATG2B	Autophagy-related protein 2 homolog B	Q96BY7	Q96BY7	S	1579	sPAKSyIsPHssPsH	PPTSPAKSYISPHSSPSHTPT
0.339586	9699800	0.017181		ATG2B	Autophagy-related protein 2 homolog B	Q96BY7	Q96BY7	S	1583	SyIsPHssPsHtPTR	PAKSYISPHSSPSHTPTRHGR
0.339409	14987000	0.0172392		ZNF281	Zinc finger protein 281	A6NF48;Q9Y2X9;F5H1Z5	A6NF48	S	615;651;356	LVQEENLsPGtQtPS	HSELVQEENLSPGTQTPSNDK
0.339257	821520	0.0172894		TP53BP1	Tumor suppressor p53-binding protein 1	A6NNK5;Q12888;F8VY86;Q12888-2;C9JXV0	A6NNK5	S	756;751;756;756;756	EAWEEAtsEDssVVI	KEQEAWEEATSEDSSVVIVDV
0.339257	821520	0.0172894		TP53BP1	Tumor suppressor p53-binding protein 1	A6NNK5;Q12888;F8VY86;Q12888-2;C9JXV0	A6NNK5	S	759;754;759;759;759	EEAtsEDssVVIVDV	EAWEEATSEDSSVVIVDVKEP
0.339257	821520	0.0172894		TP53BP1	Tumor suppressor p53-binding protein 1	A6NNK5;Q12888;F8VY86;Q12888-2;C9JXV0	A6NNK5	S	760;755;760;760;760	EAtsEDssVVIVDVK	AWEEATSEDSSVVIVDVKEPS
0.339257	821520	0.0172894		TP53BP1	Tumor suppressor p53-binding protein 1	A6NNK5;Q12888;F8VY86;Q12888-2;C9JXV0	A6NNK5	T	755;750;755;755;755	QEAWEEAtsEDssVV	HKEQEAWEEATSEDSSVVIVD
0.339131	18025000	0.0173309		RBBP6	E3 ubiquitin-protein ligase RBBP6	Q7Z6E9-2;Q7Z6E9;H3BSK8	Q7Z6E9-2	S	736;770;637	YRRYHsRsRsPQAFR	SPPYRRYHSRSRSPQAFRGQS
0.338678	50772000	0.0174814		FAM179B	Protein FAM179B	G3XAE9;Q9Y4F4	G3XAE9	S	1509;1456		TGSVGNTRSSSVSRDAFNSAE
0.338678	50772000	0.0174814		FAM179B	Protein FAM179B	G3XAE9;Q9Y4F4	G3XAE9	S	1511;1458	NTRSSSVsRDAFNsA	SVGNTRSSSVSRDAFNSAERA
0.338544	2804900	0.0175262		UBXN7	UBX domain-containing protein 7	C9JAT7;F5GYB1;O94888	C9JAT7	S	116;130;278	PPKKCARsEsLIDAs	SSSPPKKCARSESLIDASEDS
0.33784	3015000	0.0177627		C1QBP	Complement component 1 Q subcomponent-binding protein, mitochondrial	I3L3Q7;I3L3B0;Q07021	I3L3Q7	S	126;126;230		KDTNYTLNTDSLDWALYDHLM
0.335919	14722000	0.0184224		ATXN2L	Ataxin-2-like protein	Q8WWM7-6;Q8WWM7-5;Q8WWM7-4;A8K1R6;Q8WWM7-2;Q63ZY4;Q8WWM7;Q8WWM7-3;H3BUF6;H3BSK9;C9JXV8;Q8WWM7-7	Q8WWM7-6	S	305;305;305;305;305;305;305;305;305;245;305;305	QLAREIEssPQyRLR	RAAQLAREIESSPQYRLRIAM
0.335731	5412400	0.0184884		MATR3;DKFZp686L22104	Matrin-3	D6REM6;A8MXP9;P43243;B3KM87;P43243-2;H0Y8S1;Q68E03	D6REM6	S	654;654;654;316;366;12;42	EPNMLLEsEDELLVD	TEQEPNMLLESEDELLVDEEE
0.33557	5046500	0.0185446		GBF1	Golgi-specific brefeldin A-resistance guanine nucleotide exchange factor 1	Q92538	Q92538	T	1317	VsLDRGytsDsEVyt	QNDVSLDRGYTSDSEVYTDHG
0.33462	450570	0.018881		FHOD1	FH1/FH2 domain-containing protein 1	Q9Y613;B4DVN5	Q9Y613	S	498;77	PAARtPQsPAPCVLL	ETAPAARTPQSPAPCVLLRAQ
0.334405	4579800	0.0189576		KIAA0922	Transmembrane protein 131-like	H0Y2M0;A2VDJ0-2;A2VDJ0-3;A2VDJ0;A2VDJ0-5	H0Y2M0	S	603;455;742;825;826		SIVFTPDFTSSWVIRDLSLVT
0.333759	5366700	0.0191899		ERCC5	DNA repair protein complementing XP-G cells	F8WDY3;I3L0G8;P28715	F8WDY3	S	391;984;559	YESKFDssLLssDDE	LCPYESKFDSSLLSSDDETKC
0.333759	38916000	0.0191899		ERCC5	DNA repair protein complementing XP-G cells	F8WDY3;I3L0G8;P28715	F8WDY3	S	394;987;562	KFDssLLssDDEtKC	YESKFDSSLLSSDDETKCKPN
0.333759	42424000	0.0191899		ERCC5	DNA repair protein complementing XP-G cells	F8WDY3;I3L0G8;P28715	F8WDY3	S	395;988;563	FDssLLssDDEtKCK	ESKFDSSLLSSDDETKCKPNS
0.332846	44065000	0.0195228		SUPT16H	FACT complex subunit SPT16	Q9Y5B9	Q9Y5B9	S	979	ESDYSKEsLGsEEEs	EAEESDYSKESLGSEEESGKD
0.332846	44065000	0.0195228		SUPT16H	FACT complex subunit SPT16	Q9Y5B9	Q9Y5B9	S	982	YSKEsLGsEEEsGKD	ESDYSKESLGSEEESGKDWDE
0.33279	2711300	0.0195431		VBP1	Prefoldin subunit 3	F5H2A7;P61758	F5H2A7	S	152;157	TATkNLDsLEEDLDF	NLSTATKNLDSLEEDLDFLRD
0.332044	55326000	0.0198192		KLC1	Kinesin light chain 1	H0YG16;Q07866-7;Q07866-6;Q07866-4;H0YGB8;H0YJU9;H0YJL0;H0YJT3;G5E9S8;G3V2E7;F8W6L3;G3V3H3;G3V5R9;E7EVH7;Q07866-8;Q07866-2;Q07866-3;Q07866;Q07866-5;F8VTM4;Q07866-9	H0YG16	S	152;521;521;521;21;101;120;97;519;521;546;521;521;693;521;521;521;521;521;521;521	ENMEkRRsREsLNVD	NDPENMEKRRSRESLNVDVVK
0.332044	30307000	0.0198192		KLC1	Kinesin light chain 1	H0YG16;Q07866-7;Q07866-6;Q07866-4;H0YGB8;H0YJU9;H0YJL0;H0YJT3;G5E9S8;G3V2E7;F8W6L3;G3V3H3;G3V5R9;E7EVH7;Q07866-8;Q07866-2;Q07866-3;Q07866;Q07866-5;F8VTM4;Q07866-9	H0YG16	S	155;524;524;524;24;104;123;100;522;524;549;524;524;696;524;524;524;524;524;524;524	EkRRsREsLNVDVVK	ENMEKRRSRESLNVDVVKYES
0.331483	1750200	0.0200288		TPR	Nucleoprotein TPR	P12270	P12270	S	971		NVEQYQAMVTSLEESLNKEKQ
0.331366	58569000	0.0200727		ATP2B1	Calcium-transporting ATPase;Plasma membrane calcium-transporting ATPase 1	H0YHH6;E7ERY9;P20020-6;P20020-3;P20020-4;P20020	H0YHH6	S	136;898;1119;1155;1184;1193	PEFRIEDsEPHIPLI	MTHPEFRIEDSEPHIPLIDDT
0.331128	10185000	0.0201623		POLDIP3	Polymerase delta-interacting protein 3	Q9BY77-2;Q9BY77	Q9BY77-2	S	339;368	ILLRLSDsPsMKkES	DQPILLRLSDSPSMKKESELP
0.330311	18917000	0.020473		SRRM1	Serine/arginine repetitive matrix protein 1	E9PCT1;A9Z1X7;Q8IYB3;Q8IYB3-2	E9PCT1	S	10;10;10;10	AGFFRGtsAEQDNRF	_MDAGFFRGTSAEQDNRFSNK
0.330034	4012200	0.0205791		HNRNPH1	Heterogeneous nuclear ribonucleoprotein H;Heterogeneous nuclear ribonucleoprotein H, N-terminally processed	E9PCY7;P31943;G8JLB6;E7EQJ0;D6RAM1;H0YAQ2;D6R9T0;D6RFM3;D6RIT2;D6RIU0;D6RDU3;D6RJ04;D6RIH9;D6RBM0;D6RDL0;E7EN40	E9PCY7	S	63;63;63;63;63;10;63;63;63;63;63;63;63;63;63;63	EAFVELEsEDEVKLA	PSGEAFVELESEDEVKLALKK
0.329733	11594000	0.0206952		PRC1	Protein regulator of cytokinesis 1	H0YL53;G3V3N7;F8W9B5;O43663-3;O43663-2;H9KV59;O43663	H0YL53	T	173;98;481;440;451;481;481	RRGLAPNtPGKARKL	PSKRRGLAPNTPGKARKPVAA
0.329503	10762000	0.0207842		ZNF609	Zinc finger protein 609	O15014	O15014	S	576	VRLVEPHsPsPssKF	TPKVRLVEPHSPSPSSKFSTK
0.329285	67532000	0.020869		CTPS2	CTP synthase 2	Q9NRF8	Q9NRF8	S	574	ysDAsDDsFsEPRIA	SDRYSDASDDSFSEPRIAELE
0.328104	4364000	0.0213329		CDK12	Cyclin-dependent kinase 12	Q9NYV4-2;Q9NYV4;Q9NYV4-3	Q9NYV4-2;Q9NYV4-3	S	274;274;274	GSTSRRQsVsPPyKE	KSPGSTSRRQSVSPPYKEPSA
0.328104	4364000	0.0213329		CDK12	Cyclin-dependent kinase 12	Q9NYV4-2;Q9NYV4;Q9NYV4-3	Q9NYV4-2;Q9NYV4-3	S	276;276;276	TSRRQsVsPPyKEPs	PGSTSRRQSVSPPYKEPSAYQ
0.328068	11843000	0.0213473		HLTF	Helicase-like transcription factor	F5H3D6;Q14527;E7ESN4	F5H3D6	S	48;51;48		DVIPPDDFLTSDEEVDSVLFG
0.327053	5657900	0.0217533		EP400	E1A-binding protein p400	F8WCN8;A7E2D7;Q96L91-4;Q96L91-3;Q96L91-5;Q96L91-2;Q96L91	F8WCN8	S	53;53;53;53;53;53;53		APSASPSAPQSPSYQIQQLMN
0.326643	5809800	0.0219193		APC	Adenomatous polyposis coli protein	P25054-2;P25054	P25054-2	S	2734;2835	tQsPKRHsGsyLVts	SSGTQSPKRHSGSYLVTSV__
0.326387	1761300	0.0220233		ZMYM4	Zinc finger MYM-type protein 4	Q5VZL5-2;Q5VZL5-4;Q5VZL5	Q5VZL5-2	T	118;86;118	LEVERRVtQHEsDNE	DDSLEVERRVTQHESDNENEI
0.325195	12975000	0.0225141		ZEB1	Zinc finger E-box-binding homeobox 1	G3V1R3;F5H838;F5H1R1;F5H2R1;F5H4I8;Q5VZ84;E9PCM7;P37275;Q2KJ05	G3V1R3	S	798;907;1016;1011;949;996;1000;1016;1017		LSNEHVGARASPSQGDSDERE
0.325195	5674100	0.0225141		ZEB1	Zinc finger E-box-binding homeobox 1	G3V1R3;F5H838;F5H1R1;F5H2R1;F5H4I8;Q5VZ84;E9PCM7;P37275;Q2KJ05	G3V1R3	S	804;913;1022;1017;955;1002;1006;1022;1023	ASPsQGDsDERESLT	GARASPSQGDSDERESLTREE
0.325195	5674100	0.0225141		ZEB1	Zinc finger E-box-binding homeobox 1	G3V1R3;F5H838;F5H1R1;F5H2R1;F5H4I8;Q5VZ84;E9PCM7;P37275;Q2KJ05	G3V1R3	S	809;918;1027;1022;960;1007;1011;1027;1028		PSQGDSDERESLTREEDEDSE
0.325068	776980	0.0225669		SF3B2	Splicing factor 3B subunit 2	E9PPJ0;Q13435;H0YCG1	E9PPJ0	S	343;360;354	DSTRsRGsDsPAADV	REKDSTRSRGSDSPAADVEIE
0.325068	776980	0.0225669		SF3B2	Splicing factor 3B subunit 2	E9PPJ0;Q13435;H0YCG1	E9PPJ0	S	345;362;356	TRsRGsDsPAADVEI	KDSTRSRGSDSPAADVEIEYV
0.324825	58071000	0.0226684		PRPF4B	Serine/threonine-protein kinase PRP4 homolog	F5H2U2;Q13523;H0YDJ3;H0YEC8	F5H2U2	S	504;518;98;22	GMKVEQEsssDDNLE	LSEGMKVEQESSSDDNLEDFD
0.324825	58071000	0.0226684		PRPF4B	Serine/threonine-protein kinase PRP4 homolog	F5H2U2;Q13523;H0YDJ3;H0YEC8	F5H2U2	S	505;519;99;23	MKVEQEsssDDNLED	SEGMKVEQESSSDDNLEDFDV
0.324825	58071000	0.0226684		PRPF4B	Serine/threonine-protein kinase PRP4 homolog	F5H2U2;Q13523;H0YDJ3;H0YEC8	F5H2U2	S	506;520;100;24	KVEQEsssDDNLEDF	EGMKVEQESSSDDNLEDFDVE
0.324571	2501500	0.0227751		BNIP2	BCL2/adenovirus E1B 19 kDa protein-interacting protein 2	Q12982;Q12982-2	Q12982	S	114;176	TEVIRKGsItEytAA	PKTTEVIRKGSITEYTAAEEK
0.324384	74108000	0.0228537		SPAG9	C-Jun-amino-terminal kinase-interacting protein 4	O60271-3;O60271;O60271-5;O60271-4;O60271-2;H7BYB5;O60271-9;H7BY20;H7BY21;F5H7U6	O60271-3	S	730;730;716;716;720;487;573;267;477;328	GSKQRsAsQssLDKL	DTEGSKQRSASQSSLDKLDQE
0.324384	74108000	0.0228537		SPAG9	C-Jun-amino-terminal kinase-interacting protein 4	O60271-3;O60271;O60271-5;O60271-4;O60271-2;H7BYB5;O60271-9;H7BY20;H7BY21;F5H7U6	O60271-3	S	733;733;719;719;723;490;576;270;480;331	QRsAsQssLDKLDQE	GSKQRSASQSSLDKLDQELKE
0.3231	44065000	0.0233999		SUPT16H	FACT complex subunit SPT16	Q9Y5B9	Q9Y5B9	S	979	ESDYSKEsLGsEEEs	EAEESDYSKESLGSEEESGKD
0.3231	44065000	0.0233999		SUPT16H	FACT complex subunit SPT16	Q9Y5B9	Q9Y5B9	S	982	YSKEsLGsEEEsGKD	ESDYSKESLGSEEESGKDWDE
0.3231	35812000	0.0233999		SUPT16H	FACT complex subunit SPT16	Q9Y5B9	Q9Y5B9	S	986	sLGsEEEsGKDWDEL	SKESLGSEEESGKDWDELEEE
0.322736	1097300000	0.023557		SRRM2	Serine/arginine repetitive matrix protein 2	Q9UQ35;Q9UQ35-2;I3L2L6;F5GWZ7	Q9UQ35	S	1854;1854;1854;1106	tsRKRsRsRtsPAPW	TPPTSRKRSRSRTSPAPWKRS
0.322267	1280300	0.0237606		EIF2AK2	Interferon-induced, double-stranded RNA-activated protein kinase	E9PC80;P19525;F8WBH4;C9JZT2;Q05CP4	E9PC80	S	92;92;92;92;92	LLLtttNssEGLSMG	VSPLLLTTTNSSEGLSMGNYI
0.322267	1280300	0.0237606		EIF2AK2	Interferon-induced, double-stranded RNA-activated protein kinase	E9PC80;P19525;F8WBH4;C9JZT2;Q05CP4	E9PC80	T	89;89;89;89;89	VsPLLLtttNssEGL	KKAVSPLLLTTTNSSEGLSMG
0.321912	110850000	0.0239156		SRRM2	Serine/arginine repetitive matrix protein 2	I3L4D8;I3L182;Q9UQ39;I3L1I8;Q9UQ35-3;Q9UQ35;Q9UQ35-2;I3L2L6	I3L4D8;Q9UQ35	S	220;124;185;124;124;220;220;220	SKKKKHRsEsEsKKR	KKSSKKKKHRSESESKKRKHR
0.321303	80871000	0.0241834		HUWE1	E3 ubiquitin-protein ligase HUWE1	H0Y5W0;Q7Z6Z7-2;Q7Z6Z7-3;Q7Z6Z7;H0Y659	H0Y5W0;H0Y659	S	2850;3800;3807;3816;639	PMDVDQPsPsAQDtQ	EESPMDVDQPSPSAQDTQSIA
0.321012	89828000	0.0243128		RBM15	Putative RNA-binding protein 15	Q96T37-2;Q96T37-3;Q96T37	Q96T37-2	S	294;294;294	GGGQRsLsPGGAALG	PGGGGGQRSLSPGGAALGYRD
0.320827	399350	0.0243947		DNTTIP2	Deoxynucleotidyltransferase terminal-interacting protein 2	Q5QJE6;E9PRB3	Q5QJE6	S	117;124	RQILIACsPVssVRK	TRRRQILIACSPVSSVRKKPK
0.320654	4218500	0.0244722		NCMAP	Noncompact myelin-associated protein	Q5T1S8	Q5T1S8	T	18		GDTTFFSLNMTTRGEDFLYKS
0.320654	4218500	0.0244722		NCMAP	Noncompact myelin-associated protein	Q5T1S8	Q5T1S8	T	19		DTTFFSLNMTTRGEDFLYKSS
0.320277	19566000	0.024641		GBF1	Golgi-specific brefeldin A-resistance guanine nucleotide exchange factor 1	Q92538	Q92538	S	314	tDLEQPGsPGYSTAT	EDLTDLEQPGSPGYSTATEPG
0.320188	6220000	0.0246813		MAP3K4	Mitogen-activated protein kinase kinase kinase 4	F5H4R1;F5H0A4;F5H538;Q9Y6R4-2;Q9Y6R4;F5H1X6;F5H443	F5H4R1	S	87;87;87;87;87;87;66	LyGTsPPsTPRQMKR	TENLYGTSPPSTPRQMKRMST
0.319825	17271000	0.024845		UBAP2L	Ubiquitin-associated protein 2-like	F8W726;Q14157-4;Q14157-1;Q14157-3;Q14157;Q14157-5;C9JD99;F5GY23	F8W726	S	619;601;608;608;608;608;104;104	RYPssISssPQKDLT;RyPssIsssPQkDLt	QTRRYPSSISSSPQKDLTQAK
0.318619	5271100	0.0253964		DNAAF2	Protein kintoun	Q9NVR5	Q9NVR5	S	641	FLEEVLssPFKQSMS	VNEFLEEVLSSPFKQSMSLTP
0.318618	3336700	0.0253969		RBM15	Putative RNA-binding protein 15	Q96T37-2;Q96T37-3;Q96T37	Q96T37-2	T	265;265;265	RsPLDKDtyPPsAsV	RRSRSPLDKDTYPPSASVVGA
0.318605	5332100	0.0254026		CPSF1	Cleavage and polyadenylation specificity factor subunit 1	Q10570	Q10570	S	765		FSPSKEEARRSSQPPADRDPA
0.318605	5332100	0.0254026		CPSF1	Cleavage and polyadenylation specificity factor subunit 1	Q10570	Q10570	S	766	kEEARRSsQPPADRD	SPSKEEARRSSQPPADRDPAP
0.317146	28581000	0.0260839		UNCX	Homeobox protein unc-4 homolog	A6NJT0	A6NJT0	S	443	DsAFARRsPDAVAsP	GAPDSAFARRSPDAVASPGAP
0.316673	56504000	0.0263081		NMNAT1	Nicotinamide/nicotinic acid mononucleotide adenylyltransferase 1	B1AN62;Q9HAN9	B1AN62	S	117;117	DCDHQQNsPtLERPG	EASDCDHQQNSPTLERPGRKR
0.315347	12648000	0.0269458		PDXDC1	Pyridoxal-dependent decarboxylase domain-containing protein 1	H3BND4;E7EMH5;E7EPL4;H3BNZ1;Q6P996	H3BND4	S	775;666;729;730;757	EGHPGAPsPQHtDQT	SSTEGHPGAPSPQHTDQTEAF
0.31485	346350000	0.0271881		RRP1B	Ribosomal RNA processing protein 1 homolog B	Q14684-2;Q14684	Q14684-2	S	714;732	VLKtPtssPAssPLV	LHGVLKTPTSSPASSPLVAKK
0.31485	69862000	0.0271881		RRP1B	Ribosomal RNA processing protein 1 homolog B	Q14684-2;Q14684	Q14684-2	S	717;735	tPtssPAssPLVAKK	VLKTPTSSPASSPLVAKKPLT
0.31485	19640000	0.0271881		RRP1B	Ribosomal RNA processing protein 1 homolog B	Q14684-2;Q14684	Q14684-2	T	712;730	HGVLKtPtssPAssP	KPLHGVLKTPTSSPASSPLVA
0.3147	8102800	0.0272614		GPN1	GPN-loop GTPase 1	Q9HCN4-3;Q9HCN4-2;B5MBZ5;Q9HCN4	Q9HCN4-3	S	217;233;300;312	DAGtAKDsLsPVLHP	VALDAGTAKDSLSPVLHPSDL
0.3147	8102800	0.0272614		GPN1	GPN-loop GTPase 1	Q9HCN4-3;Q9HCN4-2;B5MBZ5;Q9HCN4	Q9HCN4-3	S	225;241;308;320		KDSLSPVLHPSDLILTRGTLD
0.314685	2178800	0.0272689		TNIP1	TNFAIP3-interacting protein 1	H0YC17;E7EMV7;F5H4X3;F5GYD7;E7ERB0;B7Z5B0;E7EPY1;E7ET96;Q6N077;Q15025-2;Q15025	H0YC17	S	55;389;399;399;399;404;442;442;389;442;442	sPPtAFGsPEGAGAL	PPSSPPTAFGSPEGAGALLRK
0.314644	2099800	0.0272891		CDK11B;CDK11A	Cyclin-dependent kinase 11B;Cyclin-dependent kinase 11A	P21127-9;P21127-2;P21127;P21127-6;P21127-8;P21127-3;P21127-5;P21127-10;E7ESP2;Q5QPR4;Q5QPR3;Q9UQ88-4;Q9UQ88-3;Q9UQ88-2;Q9UQ88;Q9UQ88-9	P21127-9;Q5QPR4;Q9UQ88-9	S	230;264;277;220;254;263;8;47;275;228;261;252;261;262;265;204	MEERDLLsDLQDIsD	EEKMEERDLLSDLQDISDSER
0.314644	51702000	0.0272891		CDK11B;CDK11A	Cyclin-dependent kinase 11B;Cyclin-dependent kinase 11A	P21127-9;P21127-2;P21127;P21127-6;P21127-8;P21127-3;P21127-5;P21127-10;E7ESP2;Q5QPR4;Q5QPR3;Q9UQ88-4;Q9UQ88-3;Q9UQ88-2;Q9UQ88;Q9UQ88-9	P21127-9;Q5QPR4;Q9UQ88-9	S	236;270;283;226;260;269;14;53;281;234;267;258;267;268;271;210	LsDLQDIsDsERKTS	RDLLSDLQDISDSERKTSSAE
0.314572	36323000	0.0273242		HNRNPA2B1	Heterogeneous nuclear ribonucleoproteins A2/B1	P22626-2;P22626	P22626-2	S	329;341	GNyGPGGsGGsGGyG	YGGGNYGPGGSGGSGGYGGRS
0.314572	156670000	0.0273242		HNRNPA2B1	Heterogeneous nuclear ribonucleoproteins A2/B1	P22626-2;P22626	P22626-2	S	332;344	GPGGsGGsGGyGGrs	GNYGPGGSGGSGGYGGRSRY_
0.314478	2978000	0.0273707		HTATSF1	HIV Tat-specific factor 1	O43719;E9PFP2	O43719	T	740;706		FGSVEEGPLSTGSSFILSSDD
0.313352	116380000	0.02793		GTSE1	G2 and S phase-expressed protein 1	Q9NYZ3	Q9NYZ3	S	575	DSRLVDVsPDRGsPP	RKTDSRLVDVSPDRGSPPSRV
0.313352	116380000	0.02793		GTSE1	G2 and S phase-expressed protein 1	Q9NYZ3	Q9NYZ3	S	580	DVsPDRGsPPsRVPQ	RLVDVSPDRGSPPSRVPQALN
0.3122	185930000	0.0285123		PRPF4B	Serine/threonine-protein kinase PRP4 homolog	F5H2U2;Q13523	F5H2U2	S	218;232		KSKSPSKRSKSQDQARKSKSP
0.312189	15692000	0.0285177		SUPT5H	Transcription elongation factor SPT5	B4DJK4;O00267-2;O00267	B4DJK4	S	727;931;935		HSPASYHPTPSPMAYQASPSP
0.312189	4325500	0.0285177		SUPT5H	Transcription elongation factor SPT5	B4DJK4;O00267-2;O00267	B4DJK4	T	725;929;933		NTHSPASYHPTPSPMAYQASP
0.311572	39262000	0.0288339		BUD13	BUD13 homolog	Q9BRD0	Q9BRD0	S	214	QHNssGAsPRRVRHD	RRPQHNSSGASPRRVRHDSPD
0.310119	247040000	0.0295907		MPHOSPH10	U3 small nucleolar ribonucleoprotein protein MPP10	C9JX83;O00566	C9JX83	S	27;167	LRKsPVFsDEDsDLD	KSDLRKSPVFSDEDSDLDFDI
0.309006	53477000	0.0301817		PRPF4B	Serine/threonine-protein kinase PRP4 homolog	F5H2U2;Q13523	F5H2U2	S	225;239	SQDQARKsKsPtLRR	RSKSQDQARKSKSPTLRRRSQ
0.309006	53477000	0.0301817		PRPF4B	Serine/threonine-protein kinase PRP4 homolog	F5H2U2;Q13523	F5H2U2	T	229;243	ARKsKsPtLRRRsQE	QDQARKSKSPTLRRRSQEKIG
0.308781	1020600	0.0303024		BSN	Protein bassoon	Q9UPA5	Q9UPA5	S	2041		RYLGQGLQYGSVTDLRHPTDL
0.307265	1061900	0.0311263		PKP4	Plakophilin-4	Q99569-2;Q99569;F8W7E2	Q99569-2	T	228;228;80		RAQSPSYVISTGVSPSRGSLR
0.307115	5876000	0.0312092		POLR2A	DNA-directed RNA polymerase II subunit RPB1	P24928	P24928	S	1934	sPtysPtsPKGSTYs	SPTSPTYSPTSPKGSTYSPTS
0.306641	21144000	0.0314714		RBM12	RNA-binding protein 12	Q9NTZ6	Q9NTZ6	S	413		PPPQTLPRSKSPSGQKRSRSR
0.306222	145540000	0.0317043		HTATSF1	HIV Tat-specific factor 1	O43719;E9PFP2	O43719	S	616;616	KVLDEEGsEREFDED	GSEKVLDEEGSEREFDEDSDE
0.305846	7338800	0.0319151		RYBP	RING1 and YY1-binding protein	Q8N488	Q8N488	S	227	MSAVNDEsF______	KGDMSAVNDESF_________
0.305464	16246000	0.0321306		MICALL1;DKFZp686M2226	MICAL-like protein 1	H0Y6J8;Q8N3F8;Q68D58	H0Y6J8	S	216;640;67	NPFNRKPsPAAsPAt	CKENPFNRKPSPAASPATKKA
0.305464	16246000	0.0321306		MICALL1;DKFZp686M2226	MICAL-like protein 1	H0Y6J8;Q8N3F8;Q68D58	H0Y6J8	S	220;644;71	RKPsPAAsPAtKKAT	PFNRKPSPAASPATKKATKGS
0.305393	34552000	0.0321705		KPNA6	Importin subunit alpha-7	F5H4G7;F5GYL8;O60684	F5H4G7;O60684	S	507;515;510		HYFGVEDDDSSLAPQVDETQQ
0.305264	1831600	0.0322434		ANKRD17	Ankyrin repeat domain-containing protein 17	E7EWI7;O75179-4;G5E964;O75179-2;O75179;B3KU50;H0YM23;E7EUV3	E7EWI7	S	1116;1116;1458;1708;1709;93;1593;1596	NGKLTVAsPkRGQkR	SSPNGKLTVASPKRGQKREEG
0.304262	2104100	0.0328158		MRGBP	MRG/MORF4L-binding protein	Q9NV56	Q9NV56	S	195	tANsNPssPsAAkRR	KVLTANSNPSSPSAAKRRRT_
0.303568	7385100	0.0332174		ERCC6L	DNA excision repair protein ERCC-6-like	B5MDQ0;Q2NKX8	B5MDQ0	S	318;441		SAQDGNEGEDSPDVDHIDQVT
0.303325	1143400000	0.0333587		EEF1D	Elongation factor 1-delta	E9PL71;F8W934;P29692-3;E9PQ49;E9PI39;E9PK01;E9PRY8;P29692;P29692-2;E9PQZ1;E9PBQ9;H0YE72;H0YE58	E9PL71	S	138;456;138;162;162;162;578;162;528;119;143;37;2	DDIDLFGsDNEEEDK	DEDDDIDLFGSDNEEEDKEAA
0.30232	1853700	0.03395		RBM10	RNA-binding protein 10	P98175-2;P98175;P98175-4;P98175-3	P98175-2	S	530;531;453;454	SQSYTIMsPAVLKSE	AANSQSYTIMSPAVLKSELQS
0.302063	6999100	0.0341023		NANS	Sialic acid synthase	Q5TBR0;Q5TBR1;Q9NR45	Q5TBR0	T	85;136;277	ERALGsPtKQLLPCE	RLVERALGSPTKQLLPCEMAC
0.301979	29549000	0.0341522		SRRM2	Serine/arginine repetitive matrix protein 2	Q9UQ35;Q9UQ35-2;I3L2L6;F5GWZ7	Q9UQ35	S	1403;1403;1403;655	MssNQsIssPVLDAV	KAGMSSNQSISSPVLDAVPRT
0.301538	5806900	0.0344154		KDM4A	Lysine-specific demethylase 4A	O75164	O75164	S	523	ssRDsISsDSETSEP	GSGSSRDSISSDSETSEPLSC
0.301417	1022900	0.0344881		FOXO3	Forkhead box protein O3	O43524	O43524	S	85		SAMAIGGGGGSGTLGSGLLLE
0.3009	9027100	0.0347996		SRCAP	Helicase SRCAP	Q6ZRS2-3;Q6ZRS2-2;Q6ZRS2	Q6ZRS2-3	S	2858;2954;3016	RPPKNPPsPRPSQLP	KRGRPPKNPPSPRPSQLPVLD
0.300825	1680700	0.0348452		APC	Adenomatous polyposis coli protein	P25054-2;P25054	P25054-2	S	1406;1507	FsCsssLsALsLDEP	PDGFSCSSSLSALSLDEPFIQ
0.300825	1680700	0.0348452		APC	Adenomatous polyposis coli protein	P25054-2;P25054	P25054-2	S	1409;1510	sssLsALsLDEPFIQ	FSCSSSLSALSLDEPFIQKDV
0.300069	398640	0.0353059		PAK2	Serine/threonine-protein kinase PAK 2;PAK-2p27;PAK-2p34	Q13177	Q13177	S	141	tVkQKyLsFtPPEKd	DSNTVKQKYLSFTPPEKDGFP
0.299822	20573000	0.0354574		BCL2L13	Bcl-2-like protein 13	B7Z238;B3KPE7;Q9BXK5	B7Z238	S	302;264;426	EsLVEELsPAsEKKP	AREESLVEELSPASEKKPVPP
0.299475	8656300	0.0356714		ZNF703	Zinc finger protein 703	Q9H7S9	Q9H7S9	S	367		PPSSSPLTGASPPSFLQGLCR
0.29919	12544000	0.035848				O95727-2	O95727-2	S	15		LLSIVAEFCFSPFLVTDEETA
0.298957	8452900	0.0359926		YAP1	Transcriptional coactivator YAP1	F5GWC5;E9PRV2;P46937-3;P46937-2;F5H202;P46937;H0YCI3;B4DTY1	F5GWC5	S	314;343;347;381;385;397;151;219	TYHSRDEsTDsGLsM;tyHSRDEstDsGLsM	NSGTYHSRDESTDSGLSMSSY
0.298614	4477300	0.0362069		ZCCHC8	Zinc finger CCHC domain-containing protein 8	F5H803;F5GXQ6;Q6NZY4-2;Q6NZY4	F5H803	S	147;147;298;536		RIWAALEQAESVNSDSDVPVD
0.298614	21356000	0.0362069		ZCCHC8	Zinc finger CCHC domain-containing protein 8	F5H803;F5GXQ6;Q6NZY4-2;Q6NZY4	F5H803	S	150;150;301;539		AALEQAESVNSDSDVPVDTPL
0.297759	7990700	0.0367451		CEP135	Centrosomal protein of 135 kDa	Q66GS9	Q66GS9	S	1130	PLSsTLRsPsHsPEH	ATPPLSSTLRSPSHSPEHRNV
0.297735	2526000	0.0367602		SRSF9	Serine/arginine-rich splicing factor 9	Q13242	Q13242	S	187	IRVYPERstsyGysR	TSYIRVYPERSTSYGYSRSRS
0.297601	67433000	0.0368455		TP53BP1	Tumor suppressor p53-binding protein 1	A6NNK5;Q12888;F8VY86;Q12888-2;C9JXV0;H7C3N7	A6NNK5	S	836;831;836;836;836;78	EPVEQdssQPsLPLV	AETEPVEQDSSQPSLPLVRAD
0.297601	10576000	0.0368455		TP53BP1	Tumor suppressor p53-binding protein 1	A6NNK5;Q12888;F8VY86;Q12888-2;C9JXV0;H7C3N7	A6NNK5	S	839;834;839;839;839;81	EQdssQPsLPLVRAD	EPVEQDSSQPSLPLVRADDPL
0.296973	8359200	0.037246		HNRNPK	Heterogeneous nuclear ribonucleoprotein K	B4DFF1;P61978;P61978-2;Q5T6W1	B4DFF1	T	113;118;118;49	GLQLPsPtAtsQLPL	LEEGLQLPSPTATSQLPLESD
0.296468	580740	0.0375713		SRRM2	Serine/arginine repetitive matrix protein 2	I3L4D8;I3L182;Q9UQ39;I3L1I8;Q9UQ35-3;I3L1C0;Q9UQ35;Q9UQ35-2;I3L2L6	I3L4D8;Q9UQ35	S	144;48;109;48;48;48;144;144;144	AAFGIsDsyVDGSsF	RLRAAFGISDSYVDGSSFDPQ
0.296414	238890000	0.0376058		HTATSF1	HIV Tat-specific factor 1	O43719;E9PFP2	O43719	S	624;624	EREFDEDsDEKEEEE	EGSEREFDEDSDEKEEEEDTY
0.296385	5584200	0.0376249		SKA3	Spindle and kinetochore-associated protein 3	Q8IX90-3;Q8IX90	Q8IX90-3	S	152;152	SsCIsEKsPRsPQLs	PVASSCISEKSPRSPQLSDFG
0.296226	21301000	0.037728		RBM26	RNA-binding protein 26	Q5T8P6-2;Q5T8P6;Q5T8P6-3;Q5T8P6-5;Q5T8P6-4	Q5T8P6-2	S	518;518;518;72;72	PNFNRtNsPGFQKKV	FDKPNFNRTNSPGFQKKVQFG
0.296125	38626000	0.0377929		PRRC2B	Protein PRRC2B	Q5JSZ5;G8JLK2	Q5JSZ5	S	1132;428	KPRRRVAsEtHsEGs	PRAKPRRRVASETHSEGSEYE
0.296125	38626000	0.0377929		PRRC2B	Protein PRRC2B	Q5JSZ5;G8JLK2	Q5JSZ5	T	1134;430	RRRVAsEtHsEGsEy	AKPRRRVASETHSEGSEYEEL
0.295879	6732900	0.0379529		GTSE1	G2 and S phase-expressed protein 1	Q9NYZ3	Q9NYZ3	S	461	PkFsIGDsPDsStPK	FKIPKFSIGDSPDSSTPKLSR
0.295879	6732900	0.0379529		GTSE1	G2 and S phase-expressed protein 1	Q9NYZ3	Q9NYZ3	T	466	GDsPDsStPKLSRAQ	FSIGDSPDSSTPKLSRAQRPQ
0.295495	195250000	0.038204		RIOK2	Serine/threonine-protein kinase RIO2	Q9BVS4;D6RDI3	Q9BVS4	S	332;332	NIETKEGsEFsFsDG	DDKNIETKEGSEFSFSDGEVA
0.295495	242270000	0.038204		RIOK2	Serine/threonine-protein kinase RIO2	Q9BVS4;D6RDI3	Q9BVS4	S	335;335	TKEGsEFsFsDGEVA	NIETKEGSEFSFSDGEVAEKA
0.295495	392400000	0.038204		RIOK2	Serine/threonine-protein kinase RIO2	Q9BVS4;D6RDI3	Q9BVS4	S	337;337	EGsEFsFsDGEVAEK	ETKEGSEFSFSDGEVAEKAEV
0.295426	14404000	0.038249		SLC6A15	Sodium-dependent neutral amino acid transporter B(0)AT2	Q9H2J7;F8VZC8;B7Z2P7	Q9H2J7	T	674;152;567	VNLEGDDtsLIHGKI	KEPVNLEGDDTSLIHGKIPSE
0.295124	141820000	0.0384477		SLU7	Pre-mRNA-splicing factor SLU7	O95391	O95391	S	215	KLVEQANsPKHQWGE	ASGKLVEQANSPKHQWGEEEP
0.294861	68827000	0.0386214		SRRM1	Serine/arginine repetitive matrix protein 1	E9PCT1;A9Z1X7;Q8IYB3;Q8IYB3-2	E9PCT1	S	679;676;667;665	HRKGSsPsRsTREAR	SSKHRKGSSPSRSTREARSPQ
0.294859	1367300	0.0386227		EMD	Emerin	P50402;Q5HY57	P50402	S	163;128	GRDsAyQsItHyRPV	PMYGRDSAYQSITHYRPVSAS
0.294623	40593000	0.0387787		HNRNPK	Heterogeneous nuclear ribonucleoprotein K	B4DFF1;P61978;P61978-2;Q5T6W1	B4DFF1	S	111;116;116;47	EEGLQLPsPtAtsQL;EEGLQLPsPTATSQL	PTLEEGLQLPSPTATSQLPLE
0.294608	48180000	0.0387888		MAP7D1	MAP7 domain-containing protein 1	Q3KQU3-4;Q3KQU3;Q3KQU3-2;C9JIR3;E9PLH3	Q3KQU3-4	S	123;123;123;84;84	sPtAVPAsDsPPtKQ	SQPSPTAVPASDSPPTKQEVK
0.29423	23383000	0.0390401		ST13;ST13P4	Hsc70-interacting protein;Putative protein FAM10A4	P50502;F6VDH7;Q3KNR6;Q8IZP2;F5H3M7	P50502	S	79;42;79;75;79	DEPssEEsDLEIDKE	LKADEPSSEESDLEIDKEGVI
0.294049	19304000000	0.0391612		HSP90AB1;HSP90AB2P	Heat shock protein HSP 90-beta;Putative heat shock protein HSP 90-beta 2	P08238;Q58FF8	P08238	S	255;177	PKIEDVGsDEEDDsG	EEKPKIEDVGSDEEDDSGKDK
0.294049	328590000	0.0391612		HSP90AB1;HSP90AB2P	Heat shock protein HSP 90-beta;Putative heat shock protein HSP 90-beta 2	P08238;Q58FF8	P08238	S	261;183	GsDEEDDsGKDKKKK	EDVGSDEEDDSGKDKKKKTKK
0.293226	28022000	0.0397151		GIT1	ARF GTPase-activating protein GIT1	Q9Y2X7;Q9Y2X7-3	Q9Y2X7	S	596;605	RHGsGADsDyENtQS	KLSRHGSGADSDYENTQSGDP
0.292489	2047300	0.0402169		APC	Adenomatous polyposis coli protein	P25054-2;P25054	P25054-2	S	2028;2129	ACLsRQAssDsDSIL	AAAACLSRQASSDSDSILSLK
0.292489	2047300	0.0402169		APC	Adenomatous polyposis coli protein	P25054-2;P25054	P25054-2	S	2029;2130	CLsRQAssDsDSILS	AAACLSRQASSDSDSILSLKS
0.292489	2047300	0.0402169		APC	Adenomatous polyposis coli protein	P25054-2;P25054	P25054-2	S	2031;2132	sRQAssDsDSILSLK	ACLSRQASSDSDSILSLKSGI
0.292489	2047300	0.0402169		APC	Adenomatous polyposis coli protein	P25054-2;P25054	P25054-2	S	2033;2134		LSRQASSDSDSILSLKSGISL
0.292056	391650000	0.0405141		LIG1	DNA ligase 1;DNA ligase	B4DTU4;P18858;H0YFI6;F5GZ28;B4E135	B4DTU4	S	36;66;98;66;66	KAARVLGsEGEEEDE	PGRKAARVLGSEGEEEDEALS
0.292014	2920000	0.040543		ADD3	Gamma-adducin	Q9UEY8-2;Q9UEY8	Q9UEY8-2	S	641;673	EKIEEVLsPEGsPsK	KSPEKIEEVLSPEGSPSKSPS
0.292014	2920000	0.040543		ADD3	Gamma-adducin	Q9UEY8-2;Q9UEY8	Q9UEY8-2	S	645;677	EVLsPEGsPsKsPsK	KIEEVLSPEGSPSKSPSKKKK
0.292014	2920000	0.040543		ADD3	Gamma-adducin	Q9UEY8-2;Q9UEY8	Q9UEY8-2	S	647;679	LsPEGsPsKsPsKKK	EEVLSPEGSPSKSPSKKKKKF
0.292008	18102000	0.040547		SLC1A5	Neutral amino acid transporter B(0)	Q15758	Q15758	S	9	VADPPRDskGLAAAE	__MVADPPRDSKGLAAAEPTA
0.291968	164440000	0.0405746		ATRX	Transcriptional regulator ATRX	P46100-4;P46100;P46100-2;P46100-5;P46100-3;F8WDE0;P46100-6	P46100-4	S	936;974;770;819;857;901;906	kFLKkDQsDEtsEDD	IAEKFLKKDQSDETSEDDKKQ
0.291968	164440000	0.0405746		ATRX	Transcriptional regulator ATRX	P46100-4;P46100;P46100-2;P46100-5;P46100-3;F8WDE0;P46100-6	P46100-4	S	940;978;774;823;861;905;910	kDQsDEtsEDDKKQS	FLKKDQSDETSEDDKKQSKKG
0.291968	164440000	0.0405746		ATRX	Transcriptional regulator ATRX	P46100-4;P46100;P46100-2;P46100-5;P46100-3;F8WDE0;P46100-6	P46100-4	T	939;977;773;822;860;904;909	KkDQsDEtsEDDKKQ	KFLKKDQSDETSEDDKKQSKK
0.291939	556950000	0.040595		HNRNPC	Heterogeneous nuclear ribonucleoproteins C1/C2	G3V2Q1;P07910;B2R603;G3V555;G3V575;G3V576;B4DSU6	G3V2Q1	S	113;113;113;113;113;113;113	GsVtEHPsPsPLLss	EMYGSVTEHPSPSPLLSSSFD
0.291939	467160000	0.040595		HNRNPC	Heterogeneous nuclear ribonucleoproteins C1/C2	G3V2Q1;P07910;B2R603;G3V555;G3V575;G3V576;B4DSU6	G3V2Q1	S	115;115;115;115;115;115;115	VtEHPsPsPLLsssF	YGSVTEHPSPSPLLSSSFDLD
0.291751	13675000	0.0407247		RRP36	Ribosomal RNA processing protein 36 homolog	Q96EU6-2;Q96EU6	Q96EU6-2	S	67;73	KQLVAGNsPKKQASR	KTYKQLVAGNSPKKQASRPPI
0.291043	2432600	0.0412166			Uncharacterized protein FLJ45252	I3L097;Q6ZSR9	I3L097	S	300;300	ysPEDEPsPEAQPIA	SRHYSPEDEPSPEAQPIAAYK
0.290897	43395000	0.0413187		CDC37	Hsp90 co-chaperone Cdc37;Hsp90 co-chaperone Cdc37, N-terminally processed	Q16543	Q16543	S	377	tGDEkDVsV______	VPKTGDEKDVSV_________
0.290861	36278000	0.0413441		SIRT6	NAD-dependent protein deacetylase sirtuin-6	B4DDV3;Q8N6T7-4;Q8N6T7-2;Q8N6T7	B4DDV3	S	231;234;276;303	KLEPKEEsPtRINGs	PTPKLEPKEESPTRINGSIPA
0.290364	6962100	0.0416934		RBM10	RNA-binding protein 10	P98175-2;P98175;P98175-4;P98175-3	P98175-2	S	796;797;719;720	IHRRAHLsENELEAL	NLEIHRRAHLSENELEALEKN
0.290258	109790000	0.0417681		RBM14	RNA-binding protein 14	Q96PK6	Q96PK6	T	206	DGQARQPtPPFFGRD	GGFDGQARQPTPPFFGRDRSP
0.290074	69862000	0.0418983		RRP1B	Ribosomal RNA processing protein 1 homolog B	Q14684-2;Q14684	Q14684-2	S	717;735	tPtssPAssPLVAKK	VLKTPTSSPASSPLVAKKPLT
0.290074	72918000	0.0418983		PBDC1	Protein PBDC1	Q9BVG4	Q9BVG4	S	197	GGEKGADsGEEKEEG	TKNGGEKGADSGEEKEEGINR
0.289701	146010000	0.0421632		GAPVD1	GTPase-activating protein and VPS9 domain-containing protein 1	Q14C86-2;Q14C86-6;Q14C86-3;Q14C86-5;Q14C86;H0Y7I9;C9IZ08;Q14C86-4;F8W9S7;H0Y4E7	Q14C86-2;Q14C86-4	S	966;993;966;940;966;803;966;945;945;803	ETEERKDsDDEKSDR	SRGETEERKDSDDEKSDRNRP
0.289179	126740000	0.0425369		CWC22	Pre-mRNA-splicing factor CWC22 homolog	B7WP27;Q9HCG8;B7WP74	B7WP27	S	91;91;91	DRKRSRKsPsPGRRN	RDTDRKRSRKSPSPGRRNPET
0.288996	6032000	0.0426684		ACLY	ATP-citrate synthase	E7ENH9;P53396	E7ENH9	S	535;481	MPQDsVPsPRsLQGk	KPAMPQDSVPSPRSLQGKSTT
0.288294	4156800	0.043176		RAF1	RAF proto-oncogene serine/threonine-protein kinase	B4E1N6;H7C155;B4E0X2;P04049;P04049-2	B4E1N6	S	81;175;215;296;316	sPsALsssPNNLsPt	ESASPSALSSSPNNLSPTGWS
0.288294	4156800	0.043176		RAF1	RAF proto-oncogene serine/threonine-protein kinase	B4E1N6;H7C155;B4E0X2;P04049;P04049-2	B4E1N6	S	86;180;220;301;321	sssPNNLsPtGWsQP	SALSSSPNNLSPTGWSQPKTP
0.288262	90260000	0.0431988		SRSF9	Serine/arginine-rich splicing factor 9	Q13242	Q13242	S	204	sGsRGRDsPyQsrGs	RSRSGSRGRDSPYQSRGSPHY
0.288027	111180000	0.0433704		U2SURP	U2 snRNP-associated SURP motif-containing protein	E7ET15;O15042-2;O15042;O15042-3	E7ET15	S	945;945;946;537	ssGRRVKsPsPKsER	SRSSSGRRVKSPSPKSERSER
0.288027	111180000	0.0433704		U2SURP	U2 snRNP-associated SURP motif-containing protein	E7ET15;O15042-2;O15042;O15042-3	E7ET15	S	947;947;948;539	GRRVKsPsPKsERSE	SSSGRRVKSPSPKSERSERSE
0.287931	609370	0.04344		MFF	Mitochondrial fission factor	C9JHF5;Q9GZY8-4;Q9GZY8-5;Q9GZY8-3;Q9GZY8-2;Q9GZY8	C9JHF5	S	79;79;79;79;79;105		SRPADLDLIQSTPFKPLALKT
0.287931	609370	0.04344		MFF	Mitochondrial fission factor	C9JHF5;Q9GZY8-4;Q9GZY8-5;Q9GZY8-3;Q9GZY8-2;Q9GZY8	C9JHF5	T	80;80;80;80;80;106	DLDLIQStPFKPLAL	RPADLDLIQSTPFKPLALKTP
0.28749	248890000	0.0437635		MPHOSPH10	U3 small nucleolar ribonucleoprotein protein MPP10	C9JX83;O00566	C9JX83	S	31;171	PVFsDEDsDLDFDIS	RKSPVFSDEDSDLDFDISKLE
0.287045	11954000	0.0440912		FTO	Alpha-ketoglutarate-dependent dioxygenase FTO	Q9C0B1	Q9C0B1	S	256	CEGPEEEsEDDsHLE	SYSCEGPEEESEDDSHLEGRD
0.287029	3654600	0.0441032		CTTNBP2NL	CTTNBP2 N-terminal-like protein	Q9P2B4	Q9P2B4	S	443	RLLGsSAssPGyQSS	LTKRLLGSSASSPGYQSSYQV
0.286913	1128800000	0.0441894		TRA2B	Transformer-2 protein homolog beta	P62995	P62995	S	99	RRHsHsHsPMstRRR	DYRRRHSHSHSPMSTRRRHVG
0.286122	1815800	0.0447786		MAP7	Ensconsin	F8W783;Q14244-5;Q14244-3;F5H1E2;Q14244;E9PCP3	F8W783	S	87;35;87;166;181;203		REKQLDPDRRSVSTMNLSKYV
0.285958	17873000	0.0449016		LARP1	La-related protein 1	Q6PKG0;Q6PKG0-3	Q6PKG0	S	851;774	RtAsIsssPsEGtPt	HRPRTASISSSPSEGTPTVGS
0.285409	6079100	0.0453159		RIF1	Telomere-associated protein RIF1	Q5UIP0;Q5UIP0-2	Q5UIP0	T	1408;1408		MVNEDSQVQITPNQKTLRRSS
0.285278	11925000	0.0454148		FOXK2	Forkhead box protein K2	Q01167-2;Q01167;F5H5V5	Q01167-2	S	428;428;424	FAQsAPGsPLssQPV	EARFAQSAPGSPLSSQPVLIT
0.285144	556950000	0.0455169		HNRNPC	Heterogeneous nuclear ribonucleoproteins C1/C2	G3V2Q1;P07910;B2R603;G3V555;G3V575;G3V576;B4DSU6	G3V2Q1	S	113;113;113;113;113;113;113	GsVtEHPsPsPLLss	EMYGSVTEHPSPSPLLSSSFD
0.285115	633040	0.0455387		THOC3	THO complex subunit 3	D6REC9;Q96J01	D6REC9	T	125;310		KLWEVQCESPTFTVAWHPKRP
0.285023	17677000	0.045609		GTF3C5	General transcription factor 3C polypeptide 5	Q5T7U1;H7BY84;Q9Y5Q8-2;Q9Y5Q8;Q9Y5Q8-3	Q5T7U1	S	442;495;494;504;511		EEEEEEDFKPSDGSENEMETE
0.285023	17677000	0.045609		GTF3C5	General transcription factor 3C polypeptide 5	Q5T7U1;H7BY84;Q9Y5Q8-2;Q9Y5Q8;Q9Y5Q8-3	Q5T7U1	S	445;498;497;507;514		EEEDFKPSDGSENEMETEILD
0.284951	34874000	0.0456635		LARP1	La-related protein 1	Q6PKG0;Q6PKG0-3;E5RH50;H0YBM7;E5RHK4	Q6PKG0	S	228;151;23;131;23	PKtKsDEsGEEKNGD	KESPKTKSDESGEEKNGDEDC
0.284951	34874000	0.0456635		LARP1	La-related protein 1	Q6PKG0;Q6PKG0-3;E5RH50;H0YBM7;E5RHK4	Q6PKG0	T	223;146;18;126;18	DsKEsPKtKsDEsGE	EGSDSKESPKTKSDESGEEKN
0.284815	6464600	0.0457675		ZNF281	Zinc finger protein 281	A6NF48;Q9Y2X9	A6NF48	S	124;160	FAGAEERsPGLGGGE	GGLFAGAEERSPGLGGGEGGS
0.284728	1311700	0.0458338		MYCBP2	E3 ubiquitin-protein ligase MYCBP2	O75592-2;O75592	O75592-2	S	3401;3401		APYISVTPDASPNVFEEPESN
0.284728	1311700	0.0458338		MYCBP2	E3 ubiquitin-protein ligase MYCBP2	O75592-2;O75592	O75592-2	T	3397;3397		TSVPAPYISVTPDASPNVFEE
0.284482	3265000	0.0460222		TSPO2	Translocator protein 2	Q5TGU0	Q5TGU0	S	146		LPYLAWLTVTSALTYHLWRDS
0.284482	3265000	0.0460222		TSPO2	Translocator protein 2	Q5TGU0	Q5TGU0	T	143		LLLLPYLAWLTVTSALTYHLW
0.284482	3265000	0.0460222		TSPO2	Translocator protein 2	Q5TGU0	Q5TGU0	T	145		LLPYLAWLTVTSALTYHLWRD
0.284437	119400000	0.0460565		MATR3	Matrin-3	D6REM6;A8MXP9;P43243;B3KM87;P43243-2	D6REM6	S	596;596;596;258;308	KDKSRKRsysPDGkE	LLKKDKSRKRSYSPDGKESPS
0.283833	47595000	0.0465225		EHMT2	Histone-lysine N-methyltransferase EHMT2	H0YIM0;H0YHA9;B0UZY3;B0UZY0;A2ABF8;B0UZY1;A2ABF9;Q96KQ7-2;Q96KQ7	H0YIM0	S	99;99;285;342;342;342;342;285;285		DSYSVDERVDSDSKSEVEALT
0.283833	47595000	0.0465225		EHMT2	Histone-lysine N-methyltransferase EHMT2	H0YIM0;H0YHA9;B0UZY3;B0UZY0;A2ABF8;B0UZY1;A2ABF9;Q96KQ7-2;Q96KQ7	H0YIM0	S	103;103;289;346;346;346;346;289;289		VDERVDSDSKSEVEALTEQLS
0.283487	192140000	0.0467907		FUBP1	Far upstream element-binding protein 1	B4E0X8;B4DT31;Q96AE4	B4E0X8	T	614;650;629	QAAyyAQtsPQGMPQ	YRQQAAYYAQTSPQGMPQHPP
0.283357	156680000	0.046892		HDGFRP2	Hepatoma-derived growth factor-related protein 2	Q7Z4V5-2;Q7Z4V5;I3L080	Q7Z4V5-2	S	625;625;630	EHEEGRDsEEGPRCG	EDKEHEEGRDSEEGPRCGSSE
0.282763	4606400	0.0473561		SMAD5	Mothers against decapentaplegic homolog 5	F5GWU7;Q99717	F5GWU7	S	461;462	GSPLNPIssVs____	TQMGSPLNPISSVS_______
0.282193	15865000	0.0478059		TLK2	Serine/threonine-protein kinase tousled-like 2	Q86UE8-2;Q86UE8	Q86UE8-2	S	110;110	sVPPVARssPQHsLs	PGRSVPPVARSSPQHSLSNPL
0.282193	10436000	0.0478059		TLK2	Serine/threonine-protein kinase tousled-like 2	Q86UE8-2;Q86UE8	Q86UE8-2	S	111;111	VPPVARssPQHsLsN	GRSVPPVARSSPQHSLSNPLP
0.282123	169320000	0.0478618		ZNF330	Zinc finger protein 330	E9PDK6;Q9Y3S2	E9PDK6	S	231;291	EDEGRkDsDtEssDL	EEEEDEGRKDSDTESSDLFTN
0.281411	19725000	0.0484285				P52735-3	P52735-3	S	768	ERSASRAssRsPVFt	KSRERSASRASSRSPVFTPRV
0.281411	19725000	0.0484285				P52735-3	P52735-3	S	769	RSASRAssRsPVFtP	SRERSASRASSRSPVFTPRVI
0.281411	19725000	0.0484285				P52735-3	P52735-3	S	771	ASRAssRsPVFtPRV	ERSASRASSRSPVFTPRVIGT
0.281157	179770000	0.0486319		SRRM2	Serine/arginine repetitive matrix protein 2	Q9UQ35;F5GWZ7	Q9UQ35	S	2032;1284	AIRRRsRsRtPLLPR	TPPAIRRRSRSRTPLLPRKRS
0.281157	179770000	0.0486319		SRRM2	Serine/arginine repetitive matrix protein 2	Q9UQ35;F5GWZ7	Q9UQ35	T	2034;1286	RRRsRsRtPLLPRKR	PAIRRRSRSRTPLLPRKRSRS
0.280722	1536300	0.0489831		IRS2	Insulin receptor substrate 2	Q9Y4H2	Q9Y4H2	S	770	NGDyLNVsPsDAVtt	LLPNGDYLNVSPSDAVTTGTP
0.280722	1536300	0.0489831		IRS2	Insulin receptor substrate 2	Q9Y4H2	Q9Y4H2	T	776	VsPsDAVttGtPPDF	YLNVSPSDAVTTGTPPDFFSA
0.28003	103780000	0.049545		PDIA6	Protein disulfide-isomerase A6	B7Z254;Q15084;F8WA83;B5MCQ5;Q15084-2	B7Z254	S	425;428;433;476;480	VEDDIDLsDVELDDL	ELPVEDDIDLSDVELDDLGKD
0.279835	19555000	0.0497043		PPIL4	Peptidyl-prolyl cis-trans isomerase-like 4	Q8WUA2	Q8WUA2	S	178	DLLIPDRsPEPtREQ	DPPDLLIPDRSPEPTREQLDS
0.279818	7860000	0.0497184		TERF2IP	Telomeric repeat-binding factor 2-interacting protein 1	H3BMI8;Q9NYB0	H3BMI8	S	34;205	GDAPVsPssQkLKRK	YLLGDAPVSPSSQKLKRKAEE
0.279756	662220	0.0497691		RECQL	ATP-dependent DNA helicase Q1	P46063	P46063	S	636		KAANMLQQSGSKNTGAKKRKI
0.279722	76764000	0.0497965		EIF4EBP2	Eukaryotic translation initiation factor 4E-binding protein 2	Q13542	Q13542	T	37	LPHDyCttPGGtLFs	AAQLPHDYCTTPGGTLFSTTP
0.279347	92120000	0.0501044		TP53	Cellular tumor antigen p53	P04637;P04637-2;P04637-3;E9PCY9;E7EMR6;E7EQX7;E9PFT5	P04637	S	6;6;6;6;6;6;6	__MEEPQsDPsVEPP	_____MEEPQSDPSVEPPLSQ
0.278975	16947000	0.0504123		SF1		H7C0N4;H7C561	H7C0N4	S	127;276		AAGGCRSFSRSPSDARQPHYG
0.278973	14369000	0.0504139		SF3B1	Splicing factor 3B subunit 1	O75533;B4DGZ4;E9PCH3	O75533	S	129;129;129	HRRtMIIsPERLDPF	YKKHRRTMIISPERLDPFADG
0.278349	75850000	0.0509325		SLC6A15	Sodium-dependent neutral amino acid transporter B(0)AT2	Q9H2J7;F8VSG1;Q9H2J7-2	Q9H2J7	S	55;55;55	DTDVEEGsEVEDERP	EEKDTDVEEGSEVEDERPAWN
0.278349	46003000	0.0509325		SLC6A15	Sodium-dependent neutral amino acid transporter B(0)AT2	Q9H2J7;F8VSG1;Q9H2J7-2	Q9H2J7	T	49;49;49		LIVDGQEEKDTDVEEGSEVED
0.278306	11267000	0.0509683		USP42	Ubiquitin carboxyl-terminal hydrolase 42	C9JPC9;Q9H9J4-2;Q9H9J4	C9JPC9	S	961;1115;1115	ERERHRPssPRAGAP	PARERERHRPSSPRAGAPHAL
0.277804	6346000	0.0513889		ATRX	Transcriptional regulator ATRX	P46100-4;P46100;P46100-2;P46100-5;P46100-3	P46100-4	S	1868;1906;1702;1751;1789	KGYFDEDsMDEFIAs	KENKGYFDEDSMDEFIASDSD
0.276423	3586000	0.0525618		COPA	Coatomer subunit alpha;Xenin;Proxenin	P53621;P53621-2	P53621	S	895;904	LPPELdIsPGAAGGA	DLELPPELDISPGAAGGAEDG
0.276408	79611000	0.0525749		ZNF768	Zinc finger protein 768	Q9H5H4;B7Z2Y7;H3BS42	Q9H5H4	S	160;129;129	NTELktQsPEFEAQS	ESQNTELKTQSPEFEAQSSKF
0.275855	422730000	0.053051		ZRANB2	Zinc finger Ran-binding domain-containing protein 2	O95218-2;O95218	O95218-2	S	188;188	sKyNLDAsEEEDsNK	ADLSKYNLDASEEEDSNKKKS
0.275368	2364900	0.0534735		LMO7	LIM domain only protein 7	E9PMS6;Q8WWI1-3;E9PMP7;E9PJ10;E9PLU6;E9PK58	E9PMS6	S	251;342;290;57;57;57	KHEDNRRsWAsPVyt	KPDKHEDNRRSWASPVYTEAD
0.275358	4955200000	0.0534818		NUCKS1	Nuclear ubiquitous casein and cyclin-dependent kinase substrate 1	Q9H1E3;Q9H1E3-2	Q9H1E3	S	130;90	APFQEKDsGsDEDFL	EDEAPFQEKDSGSDEDFLMED
0.275279	10711000	0.0535506		KLF3	Krueppel-like factor 3	P57682;P57682-2	P57682	S	78;78	sPPsAGNsPSSLKFP	KRSSPPSAGNSPSSLKFPSSH
0.275141	1858700	0.0536712		LRRC16A	Leucine-rich repeat-containing protein 16A	Q5VZK9-2;Q5VZK9	Q5VZK9-2	S	1286;1331	sQEVSRRsWGQQAQE	RTFSQEVSRRSWGQQAQEYQE
0.274858	20408000	0.0539179		SLC6A15	Sodium-dependent neutral amino acid transporter B(0)AT2	Q9H2J7;F8VZC8;B7Z2P7	Q9H2J7	S	675;153;568	NLEGDDtsLIHGKIP	EPVNLEGDDTSLIHGKIPSEM
0.274437	2516500	0.0542882		SAAL1	Protein SAAL1	E9PL53;E9PMD2;E9PRZ1;Q96ER3;H0YDM3	E9PL53	S	56;56;56;56;49	PENTKSSsDDEEQLt	IVSPENTKSSSDDEEQLTELD
0.274239	903820000	0.0544631		PCBP2	Poly(rC)-binding protein 2	H3BRU6;F8VZX2;Q15366-5;Q15366;Q15366-2;B4DRD7;Q15366-4;Q15366-3;F8VWQ4;F8VRG9;F8VRH0	H3BRU6	S	208;227;241;272;272;189;237;268;214;229;112	FSGIESSsPEVKGyW;FsGIESssPEVKGyW	NTGFSGIESSSPEVKGYWGLD
0.274021	7481700	0.0546554		TELO2	Telomere length regulation protein TEL2 homolog	E7EUD6;Q9Y4R8	E7EUD6	S	359;836	NRLLPPAsP______	RLKNRLLPPASP_________
0.273405	72175000	0.0552034		DHX37	Probable ATP-dependent RNA helicase DHX37	F5H3Y4;Q8IY37	F5H3Y4	S	352;565		EVDEEEGALDSDLDLDLGDGG
0.272906	3411200	0.0556504		CEP250	Centrosome-associated protein CEP250	H7C0P0;Q9BV73-2;Q9BV73	H7C0P0	S	717;2173;2229	LEKERLHsPGAtsTA	RRALEKERLHSPGATSTAELG
0.272777	2739800	0.0557672		PRKD3	Serine/threonine-protein kinase D3	C9JKP8;O94806-2;O94806	C9JKP8	S	109;213;213	GVRKRRLsNVsLPGP	NCSGVRKRRLSNVSLPGPGLS
0.272758	7030700	0.0557835		PTBP3	Polypyrimidine tract-binding protein 3	O95758-1;O95758-6;O95758-2;O95758;O95758-5;O95758-4;B1ALY4	O95758-1	S	25;28;28;56;59;62;59	KRDRPPCsPsRVLHL	KKFKRDRPPCSPSRVLHLRKI
0.272758	13954000	0.0557835		ZNF503	Zinc finger protein 503	Q96F45;Q96F45-2	Q96F45	S	417;380		PAGSSPLAGASPPSVMTASLC
0.272717	8991000	0.0558213		RREB1	Ras-responsive element-binding protein 1	Q92766;Q92766-2;Q92766-3	Q92766	S	1219;1219;1219	PADHHGPsDEEQGsP	AGAPADHHGPSDEEQGSPPED
0.272717	8991000	0.0558213		RREB1	Ras-responsive element-binding protein 1	Q92766;Q92766-2;Q92766-3	Q92766	S	1225;1225;1225	PsDEEQGsPPEDKLL	HHGPSDEEQGSPPEDKLLRAK
0.272529	688930000	0.0559909		SRRM1	Serine/arginine repetitive matrix protein 1	E9PCT1;A9Z1X7;Q8IYB3;Q8IYB3-2	E9PCT1	S	677;674;665;663	sKHRKGSsPsRsTRE	SLSSKHRKGSSPSRSTREARS
0.270902	94781000	0.0574775		STK11IP	Serine/threonine-protein kinase 11-interacting protein	H0Y469;C9JQV3;Q8N1F8-2;Q8N1F8	H0Y469	S	461;482;493;493	EARGPQEsPQKMSEE	PQEEARGPQESPQKMSEEVRA
0.270058	7700300	0.0582615		RPRD2	Regulation of nuclear pre-mRNA domain-containing protein 2	Q5VT52-2;Q5VT52-3;Q5VT52	Q5VT52-2	S	899;910;936	PsPsKNDsFFtPDSN	DRSPSPSKNDSFFTPDSNHNS
0.26926	23206000	0.0590103		ADD3	Gamma-adducin	Q9UEY8-2;Q9UEY8	Q9UEY8-2	S	423;423	EDDtVPLsPLKyMAQ	FSFEDDTVPLSPLKYMAQRQQ
0.268688	21658000	0.0595526		ATXN2	Ataxin-2	F8WB06;F8VQP2;Q99700-4;Q99700;Q24JQ7;H0YH87;Q99700-2;F8W0B5;F8VZQ7	F8WB06	S	519;519;784;784;495;705;784;108;63	KAENKGIsPVVsEHR	SFSKAENKGISPVVSEHRKQI
0.268504	53565000	0.0597279		MAPT	Microtubule-associated protein;Microtubule-associated protein tau	H0Y435;I3L170;F8WAB2;C9JSN6;C9JDD6;P10636-3;P10636-2;P10636-4;P10636-6;P10636-5;P10636-7;P10636-8;P10636;P10636-9;F8VWE3	H0Y435	S	223;300;318;717;735;275;311;340;342;369;371;400;717;735;175	VYKsPVVsGDTsPRH;VyKsPVVsGDtsPRH	AEIVYKSPVVSGDTSPRHLSN
0.268489	909090000	0.0597424		SRRM2	Serine/arginine repetitive matrix protein 2	Q9UQ35;Q9UQ35-2;I3L2L6;F5GWZ7	Q9UQ35	S	1857;1857;1857;1109	KRsRsRtsPAPWKRs	TSRKRSRSRTSPAPWKRSRSR
0.26837	5761100	0.0598562		RAD54L2	Helicase ARIP4	E7EU19;H0Y760;Q9Y4B4	E7EU19	S	849;984;1155		STSNGRHSASSPKAPDPEGLA
0.266867	8641700	0.0613065		HJURP	Holliday junction recognition protein	Q8NCD3;H7C3V8	Q8NCD3	S	140;99	LAPAVPQsPLKNELR	AWALAPAVPQSPLKNELRRKY
0.265972	59933000	0.0621834		MAX	Protein max	P61244-2;Q6V3B1;G3V563;G3V2R5	P61244-2	S	2;2;2;2	______MsDNDDIEV	_________MSDNDDIEVESD
0.265972	25953000	0.0621834		MAX	Protein max	P61244-2;Q6V3B1;G3V563;G3V2R5	P61244-2	S	11;11;11;11	NDDIEVEsDADKRAH	MSDNDDIEVESDADKRAHHNA
0.265748	1671100	0.0624047		STK10	Serine/threonine-protein kinase 10	O94804	O94804	S	191	ktLQKRDsFIGtPyW	KNLKTLQKRDSFIGTPYWMAP
0.265229	19641000	0.0629195		GRIN2C	Glutamate receptor ionotropic, NMDA 2C	Q8IW23;Q14957	Q8IW23	T	373;339		EAFYRHLLNVTWEGRDFSFSP
0.26451	2350100	0.0636388		MTMR4	Myotubularin-related protein 4	Q9NYA4	Q9NYA4	S	8	MGEEGPPsLEYIQAK	___MGEEGPPSLEYIQAKDLF
0.264424	3650900	0.0637251		BICD2	Protein bicaudal D homolog 2	Q8TD16;Q8TD16-2	Q8TD16	S	615;615	sPGSSLPsPLSDPRR	SSPSPGSSLPSPLSDPRREPM
0.263951	27143000	0.0642025		BCKDHA	2-oxoisovalerate dehydrogenase subunit alpha, mitochondrial	F5GXU9;F5H5P2;P12694	F5GXU9	S	308;371;337	TYRIGHHstsDDssA	EAMTYRIGHHSTSDDSSAYRS
0.263548	53510000	0.064612		POLR2A	DNA-directed RNA polymerase II subunit RPB1	P24928	P24928	S	1899	sPtysPtsPVytPts	SPTSPTYSPTSPVYTPTSPKY
0.263548	60570000	0.064612		POLR2A	DNA-directed RNA polymerase II subunit RPB1	P24928	P24928	S	1906	sPVytPtsPKysPts	SPTSPVYTPTSPKYSPTSPTY
0.26324	1432400000	0.0649261		SRSF1	Serine/arginine-rich splicing factor 1	Q07955	Q07955	S	199	VKVDGPRsPsyGRsR	YIRVKVDGPRSPSYGRSRSRS
0.26314	26459000	0.0650285		CHD4	Chromodomain-helicase-DNA-binding protein 4	Q14839;Q14839-2;F5GWX5;F5H2G1	Q14839	S	428;428;421;402	WEAKEDNsEGEEILE	GIQWEAKEDNSEGEEILEEVG
0.263134	9182400	0.0650344		ZC3H13	Zinc finger CCCH domain-containing protein 13	Q5T200-2;Q5T200;F8W781	Q5T200-2	S	1466;1465;421	GEGYEPIsDDELDEI	SGAGEGYEPISDDELDEILAG
0.262597	27894000	0.0655857		KMT2A	Histone-lysine N-methyltransferase 2A;MLL cleavage product N320;MLL cleavage product C180	Q03164-2;Q03164;E9PQG7	Q03164-2	S	3473;3511;3514	AVQAsPtsPGGsPss	LSSAVQASPTSPGGSPSSPSS
0.262273	4181200	0.0659205		ASF1A	Histone chaperone ASF1A	Q9Y294	Q9Y294	S	192	GWSTSENsLNVMLES	ASKGWSTSENSLNVMLESHMD
0.262235	71053000	0.06596		NOB1	RNA-binding protein NOB1	Q9ULX3	Q9ULX3	S	201	FEDRKDDsDDDGGGW	ENGFEDRKDDSDDDGGGWITP
0.261923	23376000	0.0662834		SH2D6	SH2 domain-containing protein 6	Q7Z4S9	Q7Z4S9	S	51		SSLPSVAPTGSASAAEDSDLL
0.261867	2291100	0.0663419		RIF1	Telomere-associated protein RIF1	Q5UIP0;H7C2B5	Q5UIP0	S	2260;534	TSAKGFLsPGsRsPK	HNTTSAKGFLSPGSRSPKFKS
0.26157	2050800	0.066651		UBTF	Nucleolar transcription factor 1	E9PKP7;P17480-2;P17480	E9PKP7	S	352;352;389	INKkQAtsPAsKkPA	MLNINKKQATSPASKKPAQEG
0.261255	3712900	0.0669803		WRN	Werner syndrome ATP-dependent helicase	Q14191	Q14191	S	440	DTsYVIEsDEDLEME	NENDTSYVIESDEDLEMEMLK
0.261179	9402300	0.0670603		UBE4A	Ubiquitin conjugation factor E4 A	Q14139;Q14139-2	Q14139	S	50;50		SDELPASPDDSDNSVSESLDE
0.261179	9402300	0.0670603		UBE4A	Ubiquitin conjugation factor E4 A	Q14139;Q14139-2	Q14139	S	53;53		LPASPDDSDNSVSESLDEFDY
0.261179	9402300	0.0670603		UBE4A	Ubiquitin conjugation factor E4 A	Q14139;Q14139-2	Q14139	S	55;55		ASPDDSDNSVSESLDEFDYSV
0.260996	1558600	0.0672527		FAM122B	Protein FAM122B	Q7Z309-5;Q7Z309;Q7Z309-2;Q7Z309-4;Q7Z309-3	Q7Z309-5	T	59;112;112;131;131	sPkRIDFtPVsPAPs	KLYSPKRIDFTPVSPAPSPTR
0.26046	4223400	0.0678184		TJP2	Tight junction protein ZO-2	Q9UDY2-3;Q9UDY2;F5H301;Q9UDY2-4;Q9UDY2-2;F5H886;Q9UDY2-5;B1AN86	Q9UDY2-3	S	107;130;161;107;130;134;130;107	QVAALQAsPPLDQDD	RKVQVAALQASPPLDQDDRAF
0.260122	98445000	0.0681768		FAM120A	Constitutive coactivator of PPAR-gamma-like protein 1	H7C0T0;Q9NZB2-2;Q9NZB2-5;Q9NZB2-4;Q9NZB2;Q9NZB2-6	H7C0T0	S	277;434;434;434;434;434	HtPLyERssPINPAQ	EGKHTPLYERSSPINPAQSGS
0.25981	7867100	0.0685092		THRAP3	Thyroid hormone receptor-associated protein 3	Q9Y2W1	Q9Y2W1	S	257	ALksPLQsVVVRRRs	RSPALKSPLQSVVVRRRSPRP
0.25948	86795000	0.0688634		SMARCC2	SWI/SNF complex subunit SMARCC2	F8VXC8;Q8TAQ2-2;F8VTJ5;Q8TAQ2	F8VXC8	S	306;306;306;306	RKRsPsPsPtPEAKK	YKKRKRSPSPSPTPEAKKKNA
0.258869	4979200	0.0695206		RSL1D1	Ribosomal L1 domain-containing protein 1	O76021;B4DJ58	O76021	T	358;138	GKAQVKAtNEsEDEI	RGRGKAQVKATNESEDEIPQL
0.25882	1940200	0.0695742		SEC16A	Protein transport protein Sec16A	O15027-2;O15027-4;O15027-3;O15027;O15027-5;A4QN19;C9JVR0;H0Y5S1	O15027-2	S	1211;1211;1211;1211;1211;779;313;86	sHNVAAGsyEAPLPP	IYRSHNVAAGSYEAPLPPGSF
0.258459	5553200	0.069965		CUL4B	Cullin-4B	Q13620-1;Q13620	Q13620-1	T	30;48	AtdGNtsttPPtsAk;ATDGNtsttPPtsAK	VRSATDGNTSTTPPTSAKKRK
0.258218	33684000	0.0702276		PTBP1	Polypyrimidine tract-binding protein 1	P26599-3	P26599-3	S	306		AFGAPGIISASPYAGAGFPPT
0.258185	155920000	0.070263		LARP7	La-related protein 7	Q4G0J3;H0YA82	Q4G0J3	S	337;131	ENRDIEIstEEEKDt	ASKENRDIEISTEEEKDTGDL
0.258185	155920000	0.070263		LARP7	La-related protein 7	Q4G0J3;H0YA82	Q4G0J3	T	338;132	NRDIEIstEEEKDtG	SKENRDIEISTEEEKDTGDLK
0.25815	6278600	0.0703015		DBF4	Protein DBF4 homolog A	Q9UBU7	Q9UBU7	S	625		VQSLLDLFQTSEEKSEFLGFT
0.25815	6278600	0.0703015		DBF4	Protein DBF4 homolog A	Q9UBU7	Q9UBU7	S	629	FQTSEEKsEFLGFtS	LDLFQTSEEKSEFLGFTSYTE
0.25815	6278600	0.0703015		DBF4	Protein DBF4 homolog A	Q9UBU7	Q9UBU7	T	624		PVQSLLDLFQTSEEKSEFLGF
0.257941	2546000	0.0705296		ATAD5	ATPase family AAA domain-containing protein 5	Q96QE3;Q96QE3-2	Q96QE3	S	756;756	SVIIIDSsPTALKHP	TEDSVIIIDSSPTALKHPEKN
0.257709	9201400	0.0707845		HECTD1	E3 ubiquitin-protein ligase HECTD1	Q9ULT8;H0YJD4	Q9ULT8	S	2315;681		ASTEEGHDSLSVGSFEEDSKS
0.257709	29362000	0.0707845		HECTD1	E3 ubiquitin-protein ligase HECTD1	Q9ULT8;H0YJD4	Q9ULT8	S	2318;684	HDSLSVGsFEEDSKS	EEGHDSLSVGSFEEDSKSEFI
0.257278	408390000	0.0712577		PPIG	Peptidyl-prolyl cis-trans isomerase G	E9PG73;Q13427	E9PG73	S	672;687	KKADRDQsPFsKIKQ	SREKKADRDQSPFSKIKQSSQ
0.257153	14766000	0.0713966		GIGYF2	PERQ amino acid-rich with GYF domain-containing protein 2	I1E4Y6;Q6Y7W6;F5H3C2;Q6Y7W6-3;E9PBB0;E7ESB6;E9PC50;C9JHW1	I1E4Y6	S	468;446;446;467;440;440;277;389		PLSQIPSDTASPLLILPPPVP
0.256998	69024000	0.0715675		NONO	Non-POU domain-containing octamer-binding protein	F5GYZ3;Q15233	F5GYZ3	T	361;450	GIGAIGGtPPAFNrA	TMEGIGAIGGTPPAFNRAAPG
0.256781	786690	0.0718085		PDXDC1	Pyridoxal-dependent decarboxylase domain-containing protein 1	H3BND4;E7EMH5;E7EPL4;H3BNZ1;Q6P996	H3BND4	T	709;600;663;664;691	AGVTLPPtPSGsRtK	AQGAGVTLPPTPSGSRTKQRL
0.25674	1453000000	0.0718541		TARS	Threonine--tRNA ligase, cytoplasmic	D6RJ97;D6RHV7;D6RCS6;D6RCA5;D6R9F8;D6RDJ6;P26639;B4DEG8	D6RJ97	S	8;8;8;8;8;8;8;8		___MFEEKASSPSGKMGGEEK
0.256318	4038600	0.0723235		BICD2	Protein bicaudal D homolog 2	Q8TD16;Q8TD16-2	Q8TD16	S	137;137		QLRNVLTNTQSENERLASVAQ
0.256318	4038600	0.0723235		BICD2	Protein bicaudal D homolog 2	Q8TD16;Q8TD16-2	Q8TD16	T	135;135		LKQLRNVLTNTQSENERLASV
0.256309	26065000	0.0723341		SLK	STE20-like serine/threonine-protein kinase	Q9H2G2-2;Q9H2G2	Q9H2G2-2	S	779;779	sKtkDsGsIsLQEtR	SFLSKTKDSGSISLQETRRQK
0.256211	40041000	0.0724428		DDX20	Probable ATP-dependent RNA helicase DDX20	E9PJ60;Q9UHI6	E9PJ60	S	322;714	NPEKyQEsPGIQMkT	DTPNPEKYQESPGIQMKTRLK
0.255957	66894000	0.072728		CMTM1		Q8IZ96-10;Q8IZ96-8;E9PAX0;E9PIL3;Q8IZ96-17	Q8IZ96-10	S	45;45;45;45;45	PKAQRNIsAKTAPRK	SSVPKAQRNISAKTAPRKHPE
0.255835	58885000	0.072865		MDC1	Mediator of DNA damage checkpoint protein 1	F8VV34;E7EVA7;Q14676-3;Q14676;E9PGY5;Q14676-2;F8W1C2;F8VZP8;F8VU38;Q14676-4	F8VV34	T	378;378;378;378;378;378;250;250;250;378	EsQAGsDtDVEEGKA	HLQESQAGSDTDVEEGKAPQA
0.255784	273160000	0.0729218		RPRD1B	Regulation of nuclear pre-mRNA domain-containing protein 1B	A2A2M0;Q9NQG5	A2A2M0	S	48;166	DDyPGsysPQDPsAG	EEDDDYPGSYSPQDPSAGPLL
0.255195	19320000	0.0735868		PPIG	Peptidyl-prolyl cis-trans isomerase G	E9PG73;Q13427	E9PG73	S	701;716	KEDEKIRssVEkENQ	LKNKEDEKIRSSVEKENQKSK
0.254833	54484000	0.0739971		FGFR1OP	FGFR1 oncogene partner	O95684-2;O95684	O95684-2	S	166;166	KSPEGKTsAQttPsK	SPPKSPEGKTSAQTTPSKKAN
0.254833	59969000	0.0739971		FGFR1OP	FGFR1 oncogene partner	O95684-2;O95684	O95684-2	T	170;170	GKTsAQttPsKKAND	SPEGKTSAQTTPSKKANDEAN
0.254783	165240000	0.0740546		PTMA	Prothymosin alpha;Prothymosin alpha, N-terminally processed;Thymosin alpha-1	B8ZZQ6;P06454-2;P06454;B8ZZA1;E7EVV7;B8ZZW7;H7C2N1	B8ZZQ6	T	103;106;107;127;131;132;144	VDTkkQKtDEDD___;VDtkkQktDEDD___	DDDVDTKKQKTDEDD______
0.254713	14141000	0.0741339		FNBP4	Formin-binding protein 4	Q8N3X1;Q8N3X1-2	Q8N3X1	S	393;395		SQEDLCSVVQSGESEEEEEQD
0.254713	14141000	0.0741339		FNBP4	Formin-binding protein 4	Q8N3X1;Q8N3X1-2	Q8N3X1	S	396;398		DLCSVVQSGESEEEEEQDTLE
0.254576	13722000	0.0742905		FAM21A;FAM21B;FAM21C	WASH complex subunit FAM21A;WASH complex subunit FAM21B;WASH complex subunit FAM21C	Q5T1D7;F8W7U3;E7ESD2;Q641Q2-2;Q641Q2;Q5SNT6;I3L0H6;I3L0C9;F5H0J6;Q9Y4E1-4;Q9Y4E1-3;Q9Y4E1-2;Q9Y4E1;F5H871	Q5T1D7;I3L0H6	S	182;200;288;288;288;200;200;288;288;288;233;280;288;288	PKRsRPtsFADELAA	NTRPKRSRPTSFADELAARIK
0.253572	32569000	0.0754439		SUZ12	Polycomb protein SUZ12	Q15022	Q15022	S	583	PQEMEVDsEDEKDPE	PLRPQEMEVDSEDEKDPEWLR
0.253549	12883000	0.0754703		PRPF31	U4/U6 small nuclear ribonucleoprotein Prp31	E7EVX8;Q8WWY3;E7EU94;E7ESX0;E7EN72;Q8WWY3-2;E7ESA8	E7EVX8	S	22;22;22;22;22;22;22		EEAAEEEEGGSYGEEEEEPAI
0.25326	46671000	0.075805		DYNC1LI1	Cytoplasmic dynein 1 light intermediate chain 1	E9PHI6;Q9Y6G9	E9PHI6	S	394;510	TRKPVtVsPttPtsP	DRITRKPVTVSPTTPTSPTEG
0.25326	259790000	0.075805		DYNC1LI1	Cytoplasmic dynein 1 light intermediate chain 1	E9PHI6;Q9Y6G9	E9PHI6	S	400;516	VsPttPtsPtEGEAs	PVTVSPTTPTSPTEGEAS___
0.25326	241940000	0.075805		DYNC1LI1	Cytoplasmic dynein 1 light intermediate chain 1	E9PHI6;Q9Y6G9	E9PHI6	T	397;513	PVtVsPttPtsPtEG	TRKPVTVSPTTPTSPTEGEAS
0.253118	11376000	0.0759701		ERCC6L	DNA excision repair protein ERCC-6-like	B5MDQ0;Q2NKX8	B5MDQ0	S	684;807	QDGKGtGsADsIAtL	TTLQDGKGTGSADSIATLPKG
0.253118	11376000	0.0759701		ERCC6L	DNA excision repair protein ERCC-6-like	B5MDQ0;Q2NKX8	B5MDQ0	S	687;810	KGtGsADsIAtLPkG	QDGKGTGSADSIATLPKGFGS
0.253118	7179200	0.0759701		ERCC6L	DNA excision repair protein ERCC-6-like	B5MDQ0;Q2NKX8	B5MDQ0	T	690;813	GsADsIAtLPkGFGs	KGTGSADSIATLPKGFGSVEE
0.252845	23107000	0.0762876		SLC26A2	Sulfate transporter	P50443	P50443	S	36	LELQREsstDFkQFE	GIHLELQRESSTDFKQFETND
0.252227	407150000	0.0770112		HSP90AA1	Heat shock protein HSP 90-alpha	P07900;P07900-2;Q86U12	P07900	S	263;385;84	PEIEDVGsDEEEEKK	EDKPEIEDVGSDEEEEKKDGD
0.25168	26200000	0.0776557		MTFR1L	Mitochondrial fission regulator 1-like	E9PNJ0;E9PPQ0;E9PRW1;E9PSD6;C9JF50;E9PPF9;E9PLU1;E9PRK5;E9PLD2;Q9H019-2;Q9H019-3;Q9H019	E9PNJ0	S	6;6;103;103;103;6;103;103;6;103;103;103		_____MQRNASVPNLRGS___
0.251178	3052600	0.0782523		SDCCAG3	Serologically defined colon cancer antigen 3	Q96C92-4;Q96C92-3;Q96C92-2;Q96C92	Q96C92-4	T	132;147;182;205		QTHPERVPAGTSPCSTYLSFF
0.251174	20927000	0.0782568		MEPCE	7SK snRNA methylphosphate capping enzyme	Q7L2J0	Q7L2J0	S	370		SRHRKRRRTSSKSEAGARGGG
0.250891	239940000	0.0785947		KRI1	Protein KRI1 homolog	F5H196;D3YTE0;Q8N9T8-2;Q8N9T8	F5H196	S	286;282;283;286	VQLAVDDssDEGELF	GPPVQLAVDDSSDEGELFLKK
0.250589	7884600	0.0789555		EML4	Echinoderm microtubule-associated protein-like 4	B5MBZ0;Q9HC35;B5MCW9;F2Z2B5	B5MBZ0	S	989;978;920;242	LEDQQDPsPss____	ATLLEDQQDPSPSS_______
0.25042	108960000	0.0791593		HNRNPC;HNRPC	Heterogeneous nuclear ribonucleoproteins C1/C2	G3V2Q1;P07910;B2R603;Q569J8;P07910-3;G3V5V7;G3V4C1;P07910-4;P07910-2;G3V4W0;G3V2D6	G3V2Q1;G3V4C1	S	259;260;260;56;180;144;246;204;247;247;168	sEGGADDsAEEGDLL	KMESEGGADDSAEEGDLLDDD
0.25022	41333000	0.0793992		RBM12B	RNA-binding protein 12B	Q8IXT5;B9ZVT1	Q8IXT5	S	839;719	EEDFRCPsDEDFRQL	SPQEEDFRCPSDEDFRQLPEE
0.249991	7945900	0.0796754		FBRSL1	Fibrosin-1-like protein	Q9HCM7	Q9HCM7	S	844	AKMPARAsPPHSkAA	EEAAKMPARASPPHSKAAPGD
0.249856	246340000	0.0798391		SRRM2	Serine/arginine repetitive matrix protein 2	Q9UQ35;Q9UQ35-2;I3L2L6;F5GWZ7	Q9UQ35	S	1463;1463;1463;715	RHsLsGssPGMkDIP	TPSRHSLSGSSPGMKDIPRTP
0.249469	13798000	0.0803083		FCHO2	F-BAR domain only protein 2	E9PG79;Q0JRZ9	E9PG79	S	361;394	sPAIsRHsPVQMNRN	ITLSPAISRHSPVQMNRNLSN
0.249158	24897000	0.0806877		ANKRD17	Ankyrin repeat domain-containing protein 17	E7EWI7;O75179-4;G5E964;O75179-2;O75179;B3KU50;H0YM23;E7EUV3	E7EWI7	S	1449;1449;1791;2041;2042;426;1926;1929	KEHyPVssPssPsPP	PTAKEHYPVSSPSSPSPPAQP
0.249158	96128000	0.0806877		ANKRD17	Ankyrin repeat domain-containing protein 17	E7EWI7;O75179-4;G5E964;O75179-2;O75179;B3KU50;H0YM23;E7EUV3	E7EWI7	S	1451;1451;1793;2043;2044;428;1928;1931	HyPVssPssPsPPAQ	AKEHYPVSSPSSPSPPAQPGG
0.249158	110760000	0.0806877		ANKRD17	Ankyrin repeat domain-containing protein 17	E7EWI7;O75179-4;G5E964;O75179-2;O75179;B3KU50;H0YM23;E7EUV3	E7EWI7	S	1454;1454;1796;2046;2047;431;1931;1934	VssPssPsPPAQPGG	HYPVSSPSSPSPPAQPGGVSR
0.249103	13329000	0.0807553		MSL3	Male-specific lethal 3 homolog	A6NCU2;B7Z227;A6NHW8;Q8N5Y2-2;Q8N5Y2-3;Q8N5Y2	A6NCU2	S	201;218;367;308;355;367	RLSESsAsPQPKRRQ	NCDRLSESSASPQPKRRQQDT
0.249021	2376900	0.0808555		HNRNPC	Heterogeneous nuclear ribonucleoproteins C1/C2	G3V2Q1;P07910;B2R603;G3V555;G3V575;G3V576	G3V2Q1	S	121;121;121;121;121;121	PsPLLsssFDLDyDF	HPSPSPLLSSSFDLDYDFQRD
0.248837	134720000	0.0810797		PRRC2A	Protein PRRC2A	P48634;F8W1J3;F8VVQ5;F8VVM9;A6NG23	P48634	T	1108;333;333;333;333	RRQRGsEtGsEtHEs	PKRRRQRGSETGSETHESDLA
0.248697	11161000	0.0812517		TICRR	Treslin	Q7Z2Z1-2;Q7Z2Z1	Q7Z2Z1-2	S	1554;1555		ASAWHSTDSASPQTYEVELEM
0.248586	24133000	0.0813887		PCM1	Pericentriolar material 1 protein	E7ETA6;Q15154-2;Q15154;E7EV56	E7ETA6	S	1257;1257;1257;1258	RRQFDEEsLEsFssM	NGRRRQFDEESLESFSSMPDP
0.248586	24133000	0.0813887		PCM1	Pericentriolar material 1 protein	E7ETA6;Q15154-2;Q15154;E7EV56	E7ETA6	S	1260;1260;1260;1261	FDEEsLEsFssMPDP	RRQFDEESLESFSSMPDPVDP
0.248036	28365000	0.0820663		MAP2K1	Dual specificity mitogen-activated protein kinase kinase 1	H3BRW9;Q02750-2;Q02750	H3BRW9	T	210;360;386	IGLNQPstPtHAAGV	CSTIGLNQPSTPTHAAGV___
0.247862	16803000	0.0822826		RSF1	Remodeling and spacing factor 1	Q96T23-3;Q96T23-2;Q96T23	Q96T23-3	S	1030;1251;1282	GRstDEysEADEEEE	RKRGRSTDEYSEADEEEEEEE
0.247862	1762900	0.0822826		RSF1	Remodeling and spacing factor 1	Q96T23-3;Q96T23-2;Q96T23	Q96T23-3	T	1026;1247;1278	VRKRGRstDEysEAD	KRSVRKRGRSTDEYSEADEEE
0.247857	31365000	0.0822885		DNAJC2	DnaJ homolog subfamily C member 2;DnaJ homolog subfamily C member 2, N-terminally processed	F2Z3H0;F2Z3N9;F5H621;H7C3L7;Q99543-2;Q99543	F2Z3H0	S	47;47;47;36;47;47	kRRNRNAsAsFQELE	AFVKRRNRNASASFQELEDKK
0.247857	31365000	0.0822885		DNAJC2	DnaJ homolog subfamily C member 2;DnaJ homolog subfamily C member 2, N-terminally processed	F2Z3H0;F2Z3N9;F5H621;H7C3L7;Q99543-2;Q99543	F2Z3H0	S	49;49;49;38;49;49	RNRNAsAsFQELEDK	VKRRNRNASASFQELEDKKEL
0.247627	25813000	0.082574		RBM10	RNA-binding protein 10	P98175-2;P98175	P98175-2	S	60;60	GKHDyDDssEEQsAE	SQEGKHDYDDSSEEQSAEDSY
0.247446	51169000	0.0827996		BTF3;BTF3L4	Transcription factor BTF3;Transcription factor BTF3 homolog 4	P20290;P20290-2;H0Y9Y1;B3KNJ1;Q96K17	P20290	S	201;157;80;95;153	VENFDEAskNEAN__;VENFDEAsKNEAN__	PDLVENFDEASKNEAN_____
0.247022	1409400	0.0833301		C15orf39	Uncharacterized protein C15orf39	H3BMJ2;Q6ZRI6-2;Q6ZRI6	H3BMJ2	S	191;322;322	YQAGGLGsPYLRQQA	GTGYQAGGLGSPYLRQQAAQA
0.247021	63495000	0.0833313		MAP7D1	MAP7 domain-containing protein 1	Q3KQU3-4;Q3KQU3;Q3KQU3-2;C9JIR3;E9PLH3	Q3KQU3-4	S	113;113;113;74;74	ARPPRRssQPsPtAV	PRDARPPRRSSQPSPTAVPAS
0.247021	95153000	0.0833313		MAP7D1	MAP7 domain-containing protein 1	Q3KQU3-4;Q3KQU3;Q3KQU3-2;C9JIR3;E9PLH3	Q3KQU3-4	S	116;116;116;77;77	PRRssQPsPtAVPAs	ARPPRRSSQPSPTAVPASDSP
0.246812	6055200	0.0835934		PHF23	PHD finger protein 23	I3L1N0;B4DLK6;B3KVH8;Q9BUL5	I3L1N0	S	202;265;328;332		RVMDEDIMVESGDDSWDLITC
0.246807	3773700	0.0835994		SND1	Staphylococcal nuclease domain-containing protein 1	E7ESM6;Q7KZF4	E7ESM6	S	416;426	VDyIRPAsPAtEtVP	NVTVDYIRPASPATETVPAFS
0.246752	88870000	0.0836689		BCLAF1	Bcl-2-associated transcription factor 1	Q9NYF8-2;Q9NYF8;E9PK91;Q9NYF8-3;E9PQN2;E9PKI6;E9PK09;Q9NYF8-4;E9PJA7	Q9NYF8-2	S	260;262;262;260;260;262;262;262;260	KNtPsQHsHsIQHsP	HSAKNTPSQHSHSIQHSPERS
0.246723	10356000	0.0837049		TJP2	Tight junction protein ZO-2	Q9UDY2-3;Q9UDY2;F5H301	Q9UDY2-3	S	955;978;1009	AQMRRAAssDQLRDN	EPRAQMRRAASSDQLRDNSPP
0.24621	13400000	0.0843522		LTV1	Protein LTV1 homolog	Q96GA3	Q96GA3	S	331	PMNELDEsEEEEMIT	QDLPMNELDESEEEEMITVVL
0.246087	1132900	0.084508		SUPT6H	Transcription elongation factor SPT6	Q7KZ85;Q7KZ85-3;Q7KZ85-2	Q7KZ85	S	1708;708;527		PRPSPSPMIESTPMSIAGDAT
0.246087	8983000	0.084508		SUPT6H	Transcription elongation factor SPT6	Q7KZ85;Q7KZ85-3;Q7KZ85-2	Q7KZ85	S	1712;712;531		PSPMIESTPMSIAGDATPLLD
0.246087	1132900	0.084508		SUPT6H	Transcription elongation factor SPT6	Q7KZ85;Q7KZ85-3;Q7KZ85-2	Q7KZ85	T	1709;709;528		RPSPSPMIESTPMSIAGDATP
0.246087	19566000	0.084508		SUPT6H	Transcription elongation factor SPT6	Q7KZ85;Q7KZ85-3;Q7KZ85-2	Q7KZ85	T	1718;718;537	MSIAGDAtPLLDEMD	STPMSIAGDATPLLDEMDR__
0.246054	186800000	0.0845503		PTBP1	Polypyrimidine tract-binding protein 1	P26599-3;P26599;P26599-2	P26599-3	S	141;141;141	kELktDssPNQARAQ	SNHKELKTDSSPNQARAQAAL
0.245941	64612000	0.0846931		TP53BP1	Tumor suppressor p53-binding protein 1	A6NNK5;Q12888;F8VY86;Q12888-2;C9JXV0	A6NNK5	S	299;294;299;299;299	sGLQIQKsPEPEVLs	LMESGLQIQKSPEPEVLSTQE
0.245941	12430000	0.0846931		TP53BP1	Tumor suppressor p53-binding protein 1	A6NNK5;Q12888;F8VY86;Q12888-2;C9JXV0	A6NNK5	S	306;301;306;306;306	sPEPEVLstQEDLFD	IQKSPEPEVLSTQEDLFDQSN
0.245941	1762800	0.0846931		TP53BP1	Tumor suppressor p53-binding protein 1	A6NNK5;Q12888;F8VY86;Q12888-2;C9JXV0	A6NNK5	T	307;302;307;307;307	PEPEVLstQEDLFDQ	QKSPEPEVLSTQEDLFDQSNK
0.245869	10655000	0.0847851		ZBTB7A	Zinc finger and BTB domain-containing protein 7A	O95365	O95365	S	293		LSEAAPEPGDSPGFLSGAAEG
0.245653	49334000	0.0850594		SRSF10	Serine/arginine-rich splicing factor 10	O75494-2;O75494	O75494-2	S	252;253	RSKsRsRsWtsPKss	SRSRSKSRSRSWTSPKSSGH_
0.245605	48805000	0.0851214		RBM6	RNA-binding protein 6	E9PGM9;P78332;F8WCA5;B4E0G6	E9PGM9	S	228;360;228;360	sPADFQNsQsPVQDQ	EHESPADFQNSQSPVQDQDKS
0.244759	18754000	0.0862054		NUMA1	Nuclear mitotic apparatus protein 1	Q14980-2;Q14980;F5H4J1	Q14980-2	S	820;820;820	WRERYEDsQQEEAQY	VAAWRERYEDSQQEEAQYGAM
0.24408	3234900	0.0870835		CHD8	Chromodomain-helicase-DNA-binding protein 8	H7BXG5;Q9HCK8-2;Q9HCK8	H7BXG5	S	1766;1767;2046	QDyEMRVsPsDTtPL	PTPQDYEMRVSPSDTTPLVSR
0.243526	2974100	0.0878042		DDX3X;DDX3Y	ATP-dependent RNA helicase DDX3X;ATP-dependent RNA helicase DDX3Y	O00571-2;O00571;B4E132;B4DLU5;B4DXX7;O15523;B4DLA0	O00571-2	S	638;654;399;524;649;652;131		NSDGYGGNYNSQGVDWWGN__
0.24338	11480000	0.0879964		HUWE1	E3 ubiquitin-protein ligase HUWE1	H0Y5W0;Q7Z6Z7-2;Q7Z6Z7-3;Q7Z6Z7;H0Y659	H0Y5W0;H0Y659	S	2842;3792;3799;3808;631	ASVRREEsPMDVDQP	QSEASVRREESPMDVDQPSPS
0.24338	80871000	0.0879964		HUWE1	E3 ubiquitin-protein ligase HUWE1	H0Y5W0;Q7Z6Z7-2;Q7Z6Z7-3;Q7Z6Z7;H0Y659	H0Y5W0;H0Y659	S	2850;3800;3807;3816;639	PMDVDQPsPsAQDtQ	EESPMDVDQPSPSAQDTQSIA
0.243277	102060000	0.0881313		ATRX	Transcriptional regulator ATRX	P46100-4;P46100;P46100-2;P46100-5;P46100-3;F8WDE0;P46100-6	P46100-4	S	691;729;525;574;612;656;661	sEtVDQNsDsDEMLA	SKQSETVDQNSDSDEMLAILK
0.243073	310500000	0.0883992		SON	Protein SON	P18583-6;P18583-2;P18583-10;P18583-3;P18583-4;P18583-7;P18583;P18583-5;P18583-9;H7C1M2	P18583-6	S	1829;1510;1829;1829;1829;1789;1829;1829;1869;824		DSSLRSRSKRSKSSEHKSRKR
0.243051	907400000	0.0884281		TSR2	Pre-rRNA-processing protein TSR2 homolog	Q969E8	Q969E8	S	142		ETDEDEDDVDSVEEMEVTATN
0.243051	552450000	0.0884281		TSR2	Pre-rRNA-processing protein TSR2 homolog	Q969E8	Q969E8	T	133		TATALKTARETDEDEDDVDSV
0.242558	5133800	0.0890782		KPNA1	Importin subunit alpha-5;Importin subunit alpha-5, N-terminally processed	C9J352;C9JWD9;F2Z3G4;C9J4U1;C9JYI4;P52294	C9J352	T	3;3;3;3;3;3	_____MTtPGkENFR	________MTTPGKENFRLKS
0.242244	36424000	0.0894939		CHAMP1	Chromosome alignment-maintaining phosphoprotein 1	Q96JM3	Q96JM3	S	476	QKssRGGsPDLWKSs	PESQKSSRGGSPDLWKSSFFI
0.242244	9991500	0.0894939		CHAMP1	Chromosome alignment-maintaining phosphoprotein 1	Q96JM3	Q96JM3	S	472	FPEsQKssRGGsPDL	SLDFPESQKSSRGGSPDLWKS
0.242144	69388000	0.0896269		RAB11FIP1	Rab11 family-interacting protein 1	E7EX40;Q6WKZ4-2;Q6WKZ4-3;Q6WKZ4	E7EX40	S	193;193;341;341	EIKDssPsssPsPKG	AKGEIKDSSPSSSPSPKGFRK
0.242144	69388000	0.0896269		RAB11FIP1	Rab11 family-interacting protein 1	E7EX40;Q6WKZ4-2;Q6WKZ4-3;Q6WKZ4	E7EX40	S	195;195;343;343	KDssPsssPsPKGFR	GEIKDSSPSSSPSPKGFRKKH
0.242141	17823000	0.0896307		RBM3	RNA-binding protein 3	P98179	P98179	S	147	QGGyDRysGGNyRDN	GRNQGGYDRYSGGNYRDNYDN
0.242066	3907700	0.0897297		BAD	Bcl2-associated agonist of cell death	F5H1R6;F5GY71;Q92934;F5H3B1	F5H1R6	S	14;99;99;14	PFrGrsRsAPPNLWA	EPSPFRGRSRSAPPNLWAAQR
0.241994	35029000	0.0898261		RPS6KB1	Ribosomal protein S6 kinase beta-1	B4DLT4;P23443-2;F6UYM1;P23443;Q7Z721	B4DLT4	S	345;375;375;398;398		RQTPVDSPDDSTLSESANQVF
0.241994	72881000	0.0898261		RPS6KB1	Ribosomal protein S6 kinase beta-1	B4DLT4;P23443-2;F6UYM1;P23443;Q7Z721	B4DLT4	T	337;367;367;390;390	DSKFTRQtPVDsPDD	SQFDSKFTRQTPVDSPDDSTL
0.241733	34422000	0.0901746		EML4	Echinoderm microtubule-associated protein-like 4	B5MBZ0;Q9HC35;B5MCW9	B5MBZ0	S	11;11;11	FAGsLDDsIsAAsTs	MDGFAGSLDDSISAASTSDVQ
0.241471	1052100	0.0905241		ARHGAP32	Rho GTPase-activating protein 32	A7KAX9-2;A7KAX9	A7KAX9-2	S	854;1203	SFLDQDQsPPRFYSG	PTVSFLDQDQSPPRFYSGDQP
0.241432	17149000	0.0905765		MATR3;DKFZp686L22104	Matrin-3	D6REM6;A8MXP9;P43243;B3KM87;P43243-2;H0Y8S1;Q68E03	D6REM6	S	671;671;671;333;383;29;59	EAAALLEsGssVGDE	DEEEAAALLESGSSVGDETDL
0.241432	17149000	0.0905765		MATR3;DKFZp686L22104	Matrin-3	D6REM6;A8MXP9;P43243;B3KM87;P43243-2;H0Y8S1;Q68E03	D6REM6	S	673;673;673;335;385;31;61	AALLEsGssVGDEtd	EEAAALLESGSSVGDETDLAN
0.241432	17149000	0.0905765		MATR3;DKFZp686L22104	Matrin-3	D6REM6;A8MXP9;P43243;B3KM87;P43243-2;H0Y8S1;Q68E03	D6REM6	S	674;674;674;336;386;32;62	ALLEsGssVGDEtdL	EAAALLESGSSVGDETDLANL
0.241125	53230000	0.0909889		EML4	Echinoderm microtubule-associated protein-like 4	B5MBZ0;Q9HC35;B5MCW9	B5MBZ0	S	16;16;16	DDsIsAAsTsDVQDR	GSLDDSISAASTSDVQDRLSA
0.241046	3549400	0.0910954		SPECC1L	Cytospin-A	F5H1H6;Q69YQ0	F5H1H6	S	973;973	LMAMGTTsPQLSLSS	PASLMAMGTTSPQLSLSSSPT
0.240966	363070000	0.0912033		RSL1D1	Ribosomal L1 domain-containing protein 1	O76021;B4DJ58	O76021	S	427;207	EsEtPGKsPEKKPKI	KAAESETPGKSPEKKPKIKEE
0.240651	626070000	0.0916283		CDC123	Cell division cycle protein 123 homolog	O75794	O75794	S	60	PTHSQPDsDDEAEEI	DDPPTHSQPDSDDEAEEIQWS
0.240477	183620000	0.0918647		SRSF4	Serine/arginine-rich splicing factor 4	Q08170	Q08170	S	460	NLPsEsRsRsKSASK	SKPNLPSESRSRSKSASKTRS
0.240477	183620000	0.0918647		SRSF4	Serine/arginine-rich splicing factor 4	Q08170	Q08170	S	462	PsEsRsRsKSASKTR	PNLPSESRSRSKSASKTRSRS
0.240477	183620000	0.0918647		SRSF4	Serine/arginine-rich splicing factor 4	Q08170	Q08170	S	464		LPSESRSRSKSASKTRSRSKS
0.240419	36550000	0.0919423		LRRC59	Leucine-rich repeat-containing protein 59	Q96AG4	Q96AG4	S	305	QWVLQTDsQQ_____	EILQWVLQTDSQQ________
0.240262	6659200	0.0921559		OSBPL1A	Oxysterol-binding protein-related protein 1	B7Z7D3;Q9BXW6	B7Z7D3	S	117;499	LEAVtARsFEEEGEH	LSRLEAVTARSFEEEGEHLGS
0.24022	134190000	0.092213		SGTA	Small glutamine-rich tetratricopeptide repeat-containing protein alpha	O43765	O43765	S	305	QIRsRtPsAsNDDQQ	LRSQIRSRTPSASNDDQQE__
0.239833	95847000	0.0927407		MNX1	Motor neuron and pancreas homeobox protein 1	P50219	P50219	S	77	ADRLRAEsPsPPRLL	AAPADRLRAESPSPPRLLAAH
0.239833	92406000	0.0927407		MNX1	Motor neuron and pancreas homeobox protein 1	P50219	P50219	S	79	RLRAEsPsPPRLLAA	PADRLRAESPSPPRLLAAHCA
0.239785	29755000	0.0928059		EML4	Echinoderm microtubule-associated protein-like 4	B5MBZ0;Q9HC35;B5MCW9	B5MBZ0	S	13;13;13	GsLDDsIsAAsTsDV	GFAGSLDDSISAASTSDVQDR
0.239704	984160	0.0929167		LPP	Lipoma-preferred partner	C9J4E3;C9JUT4;Q93052	C9J4E3	S	135;135;135	LADLECSsPYKPRPP	TSILADLECSSPYKPRPPQSS
0.237847	38617000	0.0954851		NSD1	Histone-lysine N-methyltransferase, H3 lysine-36 and H4 lysine-20 specific	Q96L73-2;Q96L73-3;Q96L73	Q96L73-2	S	2202;2368;2471	RQKERAAsPHQVtPQ	LTPRQKERAASPHQVTPQADE
0.237679	5670700	0.0957214		SRSF11	Serine/arginine-rich splicing factor 11	Q5T757;Q05519-2;Q05519	Q5T757	S	396;455;456	sPKTKECsVEkGTGD	ETGSPKTKECSVEKGTGDSLR
0.23766	239590000	0.0957468		MPHOSPH10	U3 small nucleolar ribonucleoprotein protein MPP10	C9JX83;O00566	C9JX83	S	23;163	SKsDLRKsPVFsDED	ENSSKSDLRKSPVFSDEDSDL
0.237575	1038700000	0.0958671		RNPS1	RNA-binding protein with serine-rich domain 1	H3BUL0;H3BMM9;H3BTC0;Q15287;H3BMS0;Q15287-3;Q15287-2;H3BV80	H3BUL0	T	161;161;161;161;138;124;138;67	RsPsPKPtKVHIGRL	RKRRSPSPKPTKVHIGRLT__
0.237531	15890000	0.0959287		XPC	DNA repair protein complementing XP-C cells	E9PH69;Q01831;E7EUB5;E9PB96	E9PH69	S	94;94;88;94	VIKDEALsDGDDLRD	NLKVIKDEALSDGDDLRDFPS
0.237252	155030000	0.0963202		SMARCA5	SWI/SNF-related matrix-associated actin-dependent regulator of chromatin subfamily A member 5	F5GZI1;O60264	F5GZI1	S	59;116	AAQKtPtsPLKMKPG	IQPAAQKTPTSPLKMKPGRPR
0.23687	17413000	0.0968599		OSBP2;OSBP	Oxysterol-binding protein;Oxysterol-binding protein 2;Oxysterol-binding protein 1	Q6ZN50;B4DFA8;B4DKE4;Q0VF99;Q969R2;F5H2A3;P22059	Q6ZN50;P22059	S	191;364;199;364;364;106;269	ATLFRITsNAMINAC	NERATLFRITSNAMINACRDF
0.23687	17413000	0.0968599		OSBP2;OSBP	Oxysterol-binding protein;Oxysterol-binding protein 2;Oxysterol-binding protein 1	Q6ZN50;B4DFA8;B4DKE4;Q0VF99;Q969R2;F5H2A3;P22059	Q6ZN50;P22059	T	190;363;198;363;363;105;268		VNERATLFRITSNAMINACRD
0.236669	9958700	0.0971449		NCOR2	Nuclear receptor corepressor 2	C9JE98;C9J239;C9J0Q5;C9JJF6;C9JFD3;Q9Y618-5;Q9Y618-4;Q9Y618-3;Q9Y618;C9JQE8;C9J7T7	C9JE98	S	1241;1242;1241;1250;1251;1242;1242;1251;1259;1259;812	TRIIGEDsPsRLDRG	GTITRIIGEDSPSRLDRGRED
0.236467	11285000	0.0974305		CRTC1	CREB-regulated transcription coactivator 1	Q6UUV9-3;Q6UUV9;Q6UUV9-2	Q6UUV9-3	S	151;151;167	TSWRRtNsDsALHQs	PADTSWRRTNSDSALHQSTMT
0.236174	2340100	0.0978486		ATF7IP	Activating transcription factor 7-interacting protein 1	Q6VMQ6-2;G3V1U0;Q6VMQ6;F5GX74;A8MV73	Q6VMQ6-2	S	260;260;260;268;260		ASDDLASGDLSSSELASDDLA
0.23586	475760000	0.0982969		SRRM2	Serine/arginine repetitive matrix protein 2	I3L4D8;I3L182;Q9UQ39;Q9UQ35;Q9UQ35-2;I3L2L6;F5GWZ7	I3L4D8;Q9UQ35	S	780;684;745;780;780;780;32	LsLRRsLsGssPCPK	KSRLSLRRSLSGSSPCPKQKS
0.235744	53035000	0.0984635		BCLAF1	Bcl-2-associated transcription factor 1	Q9NYF8-2;Q9NYF8;E9PK91;Q9NYF8-3;E9PQN2;E9PKI6;E9PK09;Q9NYF8-4;E9PJA7;H0YF00	Q9NYF8-2	S	295;297;297;295;295;297;297;297;295;38	sPIHHIPsRRsPAKT	SQNSPIHHIPSRRSPAKTIAP
0.235589	95447000	0.0986851		APIP	Methylthioribulose-1-phosphate dehydratase	Q96GX9	Q96GX9	S	87	EKDIsGPsPskKLKk	DINEKDISGPSPSKKLKKSQC
0.235472	51983000	0.0988537		SAFB	Scaffold attachment factor B1	Q15424;F5GZU3;F5H1L1;F5H0H3;B7Z2F6;B7Z959	Q15424	S	587;417;482;518;430;337	sGsKERAsKSQDRKS	VKTSGSKERASKSQDRKSASR
0.235472	51983000	0.0988537		SAFB	Scaffold attachment factor B1	Q15424;F5GZU3;F5H1L1;F5H0H3;B7Z2F6;B7Z959	Q15424	S	589;419;484;520;432;339		TSGSKERASKSQDRKSASREK
0.235387	63248000	0.0989757		GINS4	DNA replication complex GINS protein SLD5;DNA replication complex GINS protein SLD5;DNA replication complex GINS protein SLD5, N-terminally processed	E5RH56;E5RFF9;Q9BRT9-2;Q9BRT9	E5RH56	S	12;12;12;12	VdFLGQDsDGGsEEV	TEEVDFLGQDSDGGSEEVVLT
0.235387	30607000	0.0989757		GINS4	DNA replication complex GINS protein SLD5;DNA replication complex GINS protein SLD5;DNA replication complex GINS protein SLD5, N-terminally processed	E5RH56;E5RFF9;Q9BRT9-2;Q9BRT9	E5RH56	S	16;16;16;16	GQDsDGGsEEVVLtP	DFLGQDSDGGSEEVVLTPAEL
0.2352	116680000	0.099245		PPP6R3	Serine/threonine-protein phosphatase 6 regulatory subunit 3	H0YEN2;E9PQP7;H7BXH2;E9PKF6;G8JLI3;Q5H9R7-4;Q5H9R7-6;Q5H9R7-2;Q5H9R7;Q5H9R7-5;Q5H9R7-3;H0YEV0	H0YEN2	S	484;545;731;742;777;697;748;771;777;777;697;39	SVAMEASsDGEEDAE	AAGSVAMEASSDGEEDAESTD
0.234993	1871800	0.0995439		NDE1	Nuclear distribution protein nudE homolog 1	Q9NXR1-2;Q9NXR1;I3L464;I3L3G9;I3L2S8	Q9NXR1-2	S	9;9;9;9;9	EDSGKtFssEEEEAN	__MEDSGKTFSSEEEEANYWK
0.234993	1871800	0.0995439		NDE1	Nuclear distribution protein nudE homolog 1	Q9NXR1-2;Q9NXR1;I3L464;I3L3G9;I3L2S8	Q9NXR1-2	S	10;10;10;10;10	DSGKtFssEEEEANY	_MEDSGKTFSSEEEEANYWKD
0.234763	4911900	0.0998766		MAP1A	Microtubule-associated protein 1A;MAP1A heavy chain;MAP1 light chain LC2	E9PGC8;P78559;P78559-2;Q504X9	E9PGC8	S	764;526;526;526	GHRELVLssPEDLtQ	TISGHRELVLSSPEDLTQDFE
0.234763	4911900	0.0998766		MAP1A	Microtubule-associated protein 1A;MAP1A heavy chain;MAP1 light chain LC2	E9PGC8;P78559;P78559-2;Q504X9	E9PGC8	S	765;527;527;527	HRELVLssPEDLtQD	ISGHRELVLSSPEDLTQDFEE
0.234448	160590000	0.100334		MKI67	Antigen KI-67	F5H4V4;P46013	F5H4V4	S	308;308	HAVAEPAsPEQELDQ	GSGHAVAEPASPEQELDQNKG
0.234446	228690000	0.100338		CWC22	Pre-mRNA-splicing factor CWC22 homolog	B7WP27;Q9HCG8;B7WP74	B7WP27	S	93;93;93	KRSRKsPsPGRRNPE	TDRKRSRKSPSPGRRNPETSV
0.234401	3718800	0.100403		CCNY	Cyclin-Y	Q8ND76-2;Q8ND76	Q8ND76-2	S	25;25	NAHsRLEsyRPDtDL	LRRNAHSRLESYRPDTDLSRE
0.234331	23575000	0.100504		AKT1	RAC-alpha serine/threonine-protein kinase	P31749;B7Z5R1;G3V2I6	P31749	S	473;411;160	RPHFPQFsysAsGtA	SERRPHFPQFSYSASGTA___
0.234331	6763300	0.100504		AKT1	RAC-alpha serine/threonine-protein kinase	P31749;B7Z5R1;G3V2I6	P31749	S	477;415;164	PQFsysAsGtA____	PHFPQFSYSASGTA_______
0.234331	17961000	0.100504		AKT1	RAC-alpha serine/threonine-protein kinase	P31749;B7Z5R1;G3V2I6	P31749	T	479;417;166	FsysAsGtA______	FPQFSYSASGTA_________
0.234001	2679900	0.100986		WNT3A	Protein Wnt-3a	P56704	P56704	S	220		GSCEVKTCWWSQPDFRAIGDF
0.233837	8133600	0.101226		PLEKHA7	Pleckstrin homology domain-containing family A member 7	H0YDE2;E9PKC0;Q6IQ23-3;Q6IQ23;Q6IQ23-2	H0YDE2	S	243;612;186;612;612	VDIsLGDsPRRARGH	RRSVDISLGDSPRRARGHAVK
0.233201	27911000	0.102161		PPFIA1	Liprin-alpha-1	Q13136-2;Q13136;F5H1G2;H0YDW2	Q13136-2	S	708;708;195;112	tPRRIPHsPAREVDR	GRSTPRRIPHSPAREVDRLGV
0.233107	1186300000	0.102301		EEF1B2	Elongation factor 1-beta	P24534;C9JZW3	P24534	S	106;106	DDIdLFGsDDEEEsE	KDDDDIDLFGSDDEEESEEAK
0.233029	13391000	0.102415		IRS4	Insulin receptor substrate 4	O14654	O14654	S	818		YFSLPNPFRSSPLGQNDNSEY
0.232994	2000400	0.102468		GORASP1	Golgi reassembly-stacking protein 1	B3KPY8;B4E1H8;Q9BQQ3	B3KPY8	S	209;269;364		ERGGEATWSGSEFEVSFLDSP
0.232776	24773000	0.102791		MYO18A	Unconventional myosin-XVIIIa	F8W6Y3;F8W6U1;Q92614-5;Q92614-2;Q92614-3;Q92614-4;Q92614;B4DFN7;E9PQN8	F8W6Y3	S	1629;1989;1568;1710;1989;2026;2041;307;922	RysHsyLsDsDtEAK	SRPRYSHSYLSDSDTEAKLTE
0.232776	24773000	0.102791		MYO18A	Unconventional myosin-XVIIIa	F8W6Y3;F8W6U1;Q92614-5;Q92614-2;Q92614-3;Q92614-4;Q92614;B4DFN7;E9PQN8	F8W6Y3	S	1631;1991;1570;1712;1991;2028;2043;309;924	sHsyLsDsDtEAKLt	PRYSHSYLSDSDTEAKLTETN
0.232388	66488000	0.103366		ZFR	Zinc finger RNA-binding protein	Q96KR1	Q96KR1	S	1054	NRKRRRDsDGVDGFE	IHNNRKRRRDSDGVDGFEAEG
0.232028	15697000	0.103904		TRIM28	Transcription intermediary factor 1-beta	Q13263-2;Q13263	Q13263-2	S	746;828	GLssQELsGGPGDGP	PGAGLSSQELSGGPGDGP___
0.2318	105170000	0.104246		SRRM2	Serine/arginine repetitive matrix protein 2	Q9UQ35;Q9UQ35-2;I3L2L6;F5GWZ7	Q9UQ35	S	1682;1682;1682;934	sPEPKtKsRtPPRRR	SRSSPEPKTKSRTPPRRRSSR
0.2318	105170000	0.104246		SRRM2	Serine/arginine repetitive matrix protein 2	Q9UQ35;Q9UQ35-2;I3L2L6;F5GWZ7	Q9UQ35	T	1684;1684;1684;936	EPKtKsRtPPRRRss	SSPEPKTKSRTPPRRRSSRSS
0.231654	1967500000	0.104465		ACLY	ATP-citrate synthase	E7ENH9;P53396;P53396-2;B4E3P0	E7ENH9	S	511;457;457;196	PsRtAsFsEsRADEV	TPAPSRTASFSESRADEVAPA
0.231119	2506700	0.105271		NCOR2	Nuclear receptor corepressor 2	C9JE98;C9J239;C9J0Q5;C9JJF6;C9JFD3;Q9Y618-5;Q9Y618-4;Q9Y618-3;Q9Y618;C9JQE8;C9J330	C9JE98	S	54;54;54;54;54;54;54;54;54;54;54	RDYAsHLsPGSIIQP	HHSRDYASHLSPGSIIQPQRR
0.230688	81806000	0.105924		INCENP	Inner centromere protein	Q9NQS7-2;Q9NQS7	Q9NQS7-2	S	263;263	KLRIAQVsPGPRDsP	SASKLRIAQVSPGPRDSPAFP
0.23065	8499500	0.105982		ERCC6L	DNA excision repair protein ERCC-6-like	B5MDQ0;Q2NKX8	B5MDQ0	S	1065;1188	sGEQLVGsPQDKAAE	EPLSGEQLVGSPQDKAAEATN
0.230615	10037000	0.106036		PATL1	Protein PAT1 homolog 1	Q86TB9-2;Q86TB9-4;Q86TB9	Q86TB9-2	S	36;179;179	ALPRRstsPIIGsPP	SERALPRRSTSPIIGSPPVRA
0.229609	27993000	0.107574		HMGA1;C2orf81	High mobility group protein HMG-I/HMG-Y	P17096-2;P17096;H7BYM6;P17096-3;E5RIT9	P17096-2	S	8;8;8;8;8		___MSESSSKSSQPLASKQEK
0.229522	93899000	0.107708		IGF2BP2	Insulin-like growth factor 2 mRNA-binding protein 2	F8W930;Q9Y6M1-5;Q9Y6M1-6;Q9Y6M1-3;Q9Y6M1-4;Q9Y6M1-1;Q9Y6M1	F8W930	S	168;99;94;99;105;162;162	IPDEEVssPsPPQRA	ISYIPDEEVSSPSPPQRAQRG
0.229325	89191000	0.10801		TOX4	TOX high mobility group box family member 4	B4DPY8;O94842;F6TTN0	B4DPY8	S	527;550;478	DVVPEVEsPsQMDVE	MITDVVPEVESPSQMDVELVS
0.229258	7827700	0.108115		RAD50	DNA repair protein RAD50	E7EN38;Q92878-3;Q92878;Q92878-2	E7EN38	T	629;551;690;696	VCQRVFQtEAELQEV	CCPVCQRVFQTEAELQEVISD
0.229008	2823100	0.108501		NCAPD2	Condensin complex subunit 1	F5GZJ1;Q15021	F5GZJ1	S	1265;1310	LEIGQAGsQRAPsAK	IKELEIGQAGSQRAPSAKKPS
0.229004	1033000000	0.108506		HTATSF1	HIV Tat-specific factor 1	O43719	O43719	S	642	EKVFDDEsDEKEDEE	DTYEKVFDDESDEKEDEEYAD
0.228959	3068700000	0.108576		MATR3	Matrin-3	D6REM6;A8MXP9;P43243;B3KM87;P43243-2	D6REM6	S	598;598;598;260;310	KSRKRsysPDGkEsP	KKDKSRKRSYSPDGKESPSDK
0.228539	13440000	0.109229		TLE4	Transducin-like enhancer protein 4	A6NIY7;F8W6T6;Q04727;Q04727-3;H0Y5S0;H7C4E4;F8W9R0	A6NIY7	S	292;267;292;292;25;83;292	LKKDAPIsPAsIASs	TRLLKKDAPISPASIASSSST
0.228212	8164300	0.109738		UBE4B	Ubiquitin conjugation factor E4 B	O95155-2;O95155;B1AQ61	O95155-2	S	31;31;31	QPttPLtsPQRENPP	QTSQPTTPLTSPQRENPPGPP
0.228051	82934000	0.10999		RNPS1	RNA-binding protein with serine-rich domain 1	H3BUL0;H3BMM9;H3BTC0;Q15287;H3BMS0;Q15287-3;Q15287-2;H3BTV0;H3BNI3;H3BP82;H3BTR6;H3BUG0;H3BTY0;H3BNU7	H3BUL0	S	27;27;27;27;4;4;4;27;27;27;27;27;27;27	KSstRAPsPtKRKDR	NNKKSSTRAPSPTKRKDRSDE
0.227652	168630000	0.110617		LARP1	La-related protein 1	Q6PKG0;Q6PKG0-3;E5RH50;H0YBW1	Q6PKG0	T	526;449;321;234	PGsPRAVtPVPtKTE	ESAPGSPRAVTPVPTKTEEVS
0.227557	413720000	0.110765		SRSF10	Serine/arginine-rich splicing factor 10	O75494-2;O75494;O75494-5;Q5JRI3;O75494-3;Q5JRI1;O75494-4	O75494-2;Q5JRI1	S	131;131;131;131;131;131;131	YERRRsRsRsFDyNy	SRSYERRRSRSRSFDYNYRRS
0.227557	434380000	0.110765		SRSF10	Serine/arginine-rich splicing factor 10	O75494-2;O75494;O75494-5;Q5JRI3;O75494-3;Q5JRI1;O75494-4	O75494-2;Q5JRI1	S	133;133;133;133;133;133;133	RRRsRsRsFDyNyRR	SYERRRSRSRSFDYNYRRSYS
0.227557	60520000	0.110765		SRSF10	Serine/arginine-rich splicing factor 10	O75494-2;O75494;O75494-5;Q5JRI3;O75494-3;Q5JRI1;O75494-4	O75494-2;Q5JRI1	S	129;129;129;129;129;129;129	RsYERRRsRsRsFDy	SRSRSYERRRSRSRSFDYNYR
0.227552	5292100	0.110773		YBX1	Nuclease-sensitive element-binding protein 1	P67809;H0Y449;E7ETA0;C9J5V9	P67809	S	209;259;201;179	YGRRPQysNPPVQGE	RRPYGRRPQYSNPPVQGEVME
0.227176	19373000	0.111367		KDM1B	Lysine-specific histone demethylase 1B	F2Z2A7;Q8NB78-2;Q8NB78	F2Z2A7	S	17;17;17	KKAsFDHsPDsLPLR	RTKKKASFDHSPDSLPLRSSG
0.227089	3919900000	0.111504		MCM3	DNA replication licensing factor MCM3	P25205;Q7Z6P5;E9PF11	P25205	S	672;167;169	KKRsEDEsEtEDEEE	KKRKKRSEDESETEDEEEKSQ
0.227089	110010000	0.111504		MCM3	DNA replication licensing factor MCM3	P25205;Q7Z6P5;E9PF11	P25205	S	681;176;178	tEDEEEKsQEDQEQK	ESETEDEEEKSQEDQEQKRKR
0.227089	3888000000	0.111504		MCM3	DNA replication licensing factor MCM3	P25205;Q7Z6P5;E9PF11	P25205	T	674;169;171	RsEDEsEtEDEEEKs	RKKRSEDESETEDEEEKSQED
0.226909	2615900	0.111789		HIST1H2BM;HIST1H2BN;HIST1H2BH;HIST2H2BF;HIST1H2BC;HIST1H2BD;H2BFS;HIST1H2BK;HIST1H2BL	Histone H2B;Histone H2B type 1-M;Histone H2B type 1-N;Histone H2B type 1-H;Histone H2B type 2-F;Histone H2B type 1-C/E/F/G/I;Histone H2B type 1-D;Histone H2B type F-S;Histone H2B type 1-K;Histone H2B type 1-L	B4DR52;Q99879;Q99877;Q93079;Q5QNW6;P62807;P58876;P57053;O60814;Q5QNW6-2;Q99880	B4DR52;Q99880	S	39;39;39;39;39;39;39;39;39;39;39	RsRkEsysVyVykVL	KRKRSRKESYSVYVYKVLKQV
0.22669	1733900000	0.112136		BZW1	Basic leucine zipper and W2 domain-containing protein 1	H0Y503;Q7L1Q6-2;Q7L1Q6;Q7L1Q6-4;Q7L1Q6-3	H0Y503	S	127;345;411;415;443	LKNAEEEsEsEAEEG	VEWLKNAEEESESEAEEGD__
0.22669	1680700000	0.112136		BZW1	Basic leucine zipper and W2 domain-containing protein 1	H0Y503;Q7L1Q6-2;Q7L1Q6;Q7L1Q6-4;Q7L1Q6-3	H0Y503	S	129;347;413;417;445	NAEEEsEsEAEEGD_	WLKNAEEESESEAEEGD____
0.226362	140160000	0.112658		SF1		C9J792	C9J792	S	54		LGIPPNPEDRSPSPEPIYN__
0.226362	140160000	0.112658		SF1		C9J792	C9J792	S	56		IPPNPEDRSPSPEPIYN____
0.225837	1285200	0.113499		STK3	Serine/threonine-protein kinase 3;Serine/threonine-protein kinase 3 36kDa subunit;Serine/threonine-protein kinase 3 20kDa subunit	Q13188;B3KYA7	Q13188	S	369;397		ESDLGTMVINSEDEEEEDGTM
0.225673	1066700	0.113762		PKP4	Plakophilin-4	Q99569-2;Q99569;F8W7E2	Q99569-2	S	231;231;83	yVISTGVsPsRGsLR	SPSYVISTGVSPSRGSLRTSL
0.225138	48753000	0.114624		TPR	Nucleoprotein TPR	P12270	P12270	S	1893	YNQDsQDsIGEGVTQ	TQVYNQDSQDSIGEGVTQGDY
0.224903	2168300	0.115004		WDR62	WD repeat-containing protein 62	O43379;O43379-4	O43379	S	1144;1149	RAGtGyAsPDRTHVL	SQPRAGTGYASPDRTHVLAAG
0.224452	100400000	0.115737		ESF1	ESF1 homolog	Q9H501	Q9H501	S	153	FKIDsNIsPKKDSKE	SCKFKIDSNISPKKDSKEFTQ
0.224099	122440000	0.116313		CDK12	Cyclin-dependent kinase 12	Q9NYV4-2;Q9NYV4;Q9NYV4-3	Q9NYV4-2;Q9NYV4-3	S	332;332;332	SPYGRRRssSPFLSK;sPyGrrrsssPFLsK	RSPSPYGRRRSSSPFLSKRSL
0.224099	48239000	0.116313		CDK12	Cyclin-dependent kinase 12	Q9NYV4-2;Q9NYV4;Q9NYV4-3	Q9NYV4-2;Q9NYV4-3	S	333;333;333	PYGRRRssSPFLSKR;PyGrrrsssPFLsKR	SPSPYGRRRSSSPFLSKRSLS
0.224099	122440000	0.116313		CDK12	Cyclin-dependent kinase 12	Q9NYV4-2;Q9NYV4;Q9NYV4-3	Q9NYV4-2;Q9NYV4-3	S	334;334;334	yGrrrsssPFLsKRs;YGRRRSSsPFLsKRs	PSPYGRRRSSSPFLSKRSLSR
0.22389	27444000	0.116655		SEC16A	Protein transport protein Sec16A	O15027-2;O15027-4;O15027-3;O15027;O15027-5;A4QN19	O15027-2	S	304;304;304;304;304;109	PLNLDPSsPSDQFRy	PSEPLNLDPSSPSDQFRYGPL
0.223462	11231000	0.117359		KDM5A	Lysine-specific demethylase 5A	F5H1F7;P29375-2;P29375	F5H1F7	S	1111;1111;1111	DLDLEPLsDLEEGLE	KEKDLDLEPLSDLEEGLEETR
0.222713	3458000	0.118597		HELLS	Lymphoid-specific helicase	Q9NRZ9-6;Q9NRZ9-5;Q9NRZ9-3;Q9NRZ9-2;Q9NRZ9	Q9NRZ9-6	S	699;731;797;813;829	IFKILENsEDssPEC	KMGIFKILENSEDSSPECLF_
0.222588	5966700	0.118806		ZNF768	Zinc finger protein 768	Q9H5H4;B7Z2Y7;H3BS42	Q9H5H4	S	83;52;52	sPRFEPEsPGFESRs	EPQSPRFEPESPGFESRSPGL
0.222534	61236000	0.118895		CAMSAP2	Calmodulin-regulated spectrin-associated protein 2	Q08AD1-2;Q08AD1-3;Q08AD1	Q08AD1-2	S	1121;1137;1148	VEKyDGEsDKEQFDD	DVPVEKYDGESDKEQFDDDQK
0.222357	897360	0.11919		PTPN13	Tyrosine-protein phosphatase non-receptor type 13	Q12923-3;Q12923;Q12923-4;Q12923-2	Q12923-3	S	2033;2052;2057;1861		YIQEDDIYDDSQEAEVIQSLL
0.22231	5049000	0.119268		CAMSAP3	Calmodulin-regulated spectrin-associated protein 3	Q9P1Y5;Q9P1Y5-2	Q9P1Y5	S	368;395	LSsGGPQsPLRGsTG	HPLLSSGGPQSPLRGSTGSLK
0.222305	10754000	0.119276		MYCBP2	E3 ubiquitin-protein ligase MYCBP2	O75592-2;O75592;H7C3U4	O75592-2	S	3893;3893;317	QEEkALLssPEGEEK	TPEQEEKALLSSPEGEEKATS
0.222305	10754000	0.119276		MYCBP2	E3 ubiquitin-protein ligase MYCBP2	O75592-2;O75592;H7C3U4	O75592-2	S	3894;3894;318	EEkALLssPEGEEKV	PEQEEKALLSSPEGEEKATSD
0.222276	31686000	0.119325		RALGPS2	Ras-specific guanine nucleotide-releasing factor RalGPS2	H7C2H2;Q86X27	H7C2H2	T	64;326	EGALLPQtPPsPRNL	VAAEGALLPQTPPSPRNLIPH
0.221956	93176000	0.119859		SGTA	Small glutamine-rich tetratricopeptide repeat-containing protein alpha	O43765	O43765	S	301	QLRsQIRsRtPsAsN	LIEQLRSQIRSRTPSASNDDQ
0.221638	149990000	0.120394		ATRX	Transcriptional regulator ATRX	P46100-4;P46100;P46100-2;P46100-5;P46100-3;F8WDE0;P46100-6	P46100-4	S	811;849;645;694;732;776;781	PNTKDFDssEDEKHS	KRIPNTKDFDSSEDEKHSKKG
0.221638	149990000	0.120394		ATRX	Transcriptional regulator ATRX	P46100-4;P46100;P46100-2;P46100-5;P46100-3;F8WDE0;P46100-6	P46100-4	S	812;850;646;695;733;777;782	NTKDFDssEDEKHSK	RIPNTKDFDSSEDEKHSKKGM
0.221526	389610000	0.120581		SRSF11	Serine/arginine-rich splicing factor 11	Q5T757;Q05519-2;Q05519	Q5T757	S	374;433;434	EEEQGYDsEKEKKEE;EEEQGyDsEKEKKEE	DYDEEEQGYDSEKEKKEEKKP
0.220928	1672200000	0.12159		SLC39A7	Zinc transporter SLC39A7	A2AAT0;E7ESG6;F5H0B5;Q92504	A2AAT0	S	185;180;256;275	RSTKEKQssEEEEKE	RQERSTKEKQSSEEEEKETRG
0.220928	1672200000	0.12159		SLC39A7	Zinc transporter SLC39A7	A2AAT0;E7ESG6;F5H0B5;Q92504	A2AAT0	S	186;181;257;276	STKEKQssEEEEKET	QERSTKEKQSSEEEEKETRGV
0.220567	9122600	0.122204		REXO4	RNA exonuclease 4	Q9GZR2-2;Q9GZR2	Q9GZR2-2	S	247;419	LTAPDHCsDDA____	RPLLTAPDHCSDDA_______
0.220497	9329100	0.122322		CNOT1	CCR4-NOT transcription complex subunit 1	H3BMH0;B3KPW6;F8WA87;A5YKK6-4;A5YKK6-3;A5YKK6-2;A5YKK6	H3BMH0	S	117;136;707;707;707;707;707		PPSASSLDAISPVQIDPLAGM
0.220225	29499000	0.122785		FAM175A	BRCA1-A complex subunit Abraxas	D6REL5;Q6UWZ7	D6REL5	S	357;406	GFGEYsRsPtF____	KMKGFGEYSRSPTF_______
0.220193	3156000	0.12284		CFAP97	Cilia- and flagella-associated protein 97	Q9P2B7	Q9P2B7	S	488	RSTLGQysPLRAsRT	RRARSTLGQYSPLRASRTSSA
0.220145	86263000	0.122922		RBM26	RNA-binding protein 26	Q5T8P6-2;Q5T8P6;Q5T8P6-3;Q5T8P6-5;Q5T8P6-4	Q5T8P6-2	S	616;616;616;170;170	tQQLQTTsPKVMQPL	EGSTQQLQTTSPKVMQPLVQQ
0.2201	88245000	0.122998		SRRM2	Serine/arginine repetitive matrix protein 2	Q9UQ35;Q9UQ35-2;I3L2L6;F5GWZ7	Q9UQ35	S	1326;1326;1326;578	NsPLRENsFGsPLEF	ELSNSPLRENSFGSPLEFRNS
0.219846	2227900	0.123434		UNC5B	Netrin receptor UNC5B	Q8IZJ1-2;Q8IZJ1	Q8IZJ1-2	S	517;528	FLHLRSAsLGsQQLL	DTHFLHLRSASLGSQQLLGLP
0.219846	2227900	0.123434		UNC5B	Netrin receptor UNC5B	Q8IZJ1-2;Q8IZJ1	Q8IZJ1-2	S	520;531	LRSAsLGsQQLLGLP	FLHLRSASLGSQQLLGLPRDP
0.219827	298840000	0.123467		NPM1	Nucleophosmin	P06748;P06748-2	P06748	S	254;225	IkAkMQAsIEkGGsL	VEDIKAKMQASIEKGGSLPKV
0.219635	94383000	0.123795		SRSF10	Serine/arginine-rich splicing factor 10	O75494-2;O75494	O75494-2	S	255;256	sRsRsWtsPKssGH_	RSKSRSRSWTSPKSSGH____
0.219438	12399000	0.124135		WDR44	WD repeat-containing protein 44	Q5JSH3-2;Q5JSH3;F8W913	Q5JSH3-2	S	96;96;71	LsDQAtAsPIVARTD	GKELSDQATASPIVARTDLSN
0.21935	310810000	0.124286		EPN2	Epsin-2	I3L2B2;I3L0K8;E9PBC2;F6PQP6;E7EMC3;O95208-3;O95208-2;O95208;E9PBC1	I3L2B2	S	195;195;195;195;195;156;195;195;195	kAGGsPAsyHGstsP	EYGKAGGSPASYHGSTSPRVS
0.218916	6069000	0.125035		FAM169A	Soluble lamin-associated protein of 75 kDa	D6RB01;Q9Y6X4	D6RB01	T	388;448	ITEEEDstsEVLDEE	TSLITEEEDSTSEVLDEELKL
0.218543	13080000	0.125682		XRCC6	X-ray repair cross-complementing protein 6	B1AHC8;P12956;F5H1I8;B1AHC9	B1AHC8	S	509;550;417;500	RkHDNEGsGSkRPkV	VTKRKHDNEGSGSKRPKVEYS
0.218116	26217000	0.126426		SLC23A2	Solute carrier family 23 member 2	B4DJZ1;Q9UGH3	B4DJZ1	S	532;646	SRSSDEDsQAtG___	SDNSRSSDEDSQATG______
0.218029	581470000	0.126577		TRA2B	Transformer-2 protein homolog beta	P62995	P62995	S	22		RESRSASRSGSAHGSGKSARH
0.218018	29675000	0.126597		MYBBP1A	Myb-binding protein 1A	Q9BQG0;Q9BQG0-2;I3L1L3	Q9BQG0	S	1159;1159;1079	KDAKEIPsAtQsPIs	LEKKDAKEIPSATQSPISKKR
0.218018	183790000	0.126597		MYBBP1A	Myb-binding protein 1A	Q9BQG0;Q9BQG0-2;I3L1L3	Q9BQG0	S	1163;1163;1083	EIPsAtQsPIsKKRK	DAKEIPSATQSPISKKRKKKG
0.217762	8016600	0.127044		SLC9A8	Sodium/hydrogen exchanger 8	B4DIV9;B7Z3B1;Q9Y2E8;Q9Y2E8-2	B4DIV9	S	271;352;571;587	EEVRQGPsGsEDDEQ	KWYEEVRQGPSGSEDDEQELL
0.217762	8016600	0.127044		SLC9A8	Sodium/hydrogen exchanger 8	B4DIV9;B7Z3B1;Q9Y2E8;Q9Y2E8-2	B4DIV9	S	273;354;573;589	VRQGPsGsEDDEQEL	YEEVRQGPSGSEDDEQELL__
0.217733	18772000	0.127095		TSC2	Tuberin	P49815-4;P49815;H3BMQ0;B4DIL8;P49815-6;P49815-5;P49815-3;P49815-2;H3BQK4	P49815-4	S	1388;1411;1355;1296;1308;1344;1367;1368;139	KADVGRLsPEVKARs	PGDKADVGRLSPEVKARSQSG
0.217628	31983000	0.12728		ARHGEF26	Rho guanine nucleotide exchange factor 26	Q96DR7-3;E9PBD0;Q96DR7	Q96DR7-3	S	392;392;392	EKALDIDsDEEsEPK	NYKEKALDIDSDEESEPKEQK
0.217325	2653800	0.127812		TBC1D5	TBC1 domain family member 5	C9J3F6;Q92609;C9JP52	C9J3F6	S	528;554;576	GGREFtGsPPssAtK	SLPGGREFTGSPPSSATKKDS
0.217222	12893000	0.127993		PTPN14	Tyrosine-protein phosphatase non-receptor type 14	Q15678	Q15678	S	707		TFSDATMLIHSSESEEEEEEA
0.217222	12893000	0.127993		PTPN14	Tyrosine-protein phosphatase non-receptor type 14	Q15678	Q15678	S	708		FSDATMLIHSSESEEEEEEAP
0.217222	12893000	0.127993		PTPN14	Tyrosine-protein phosphatase non-receptor type 14	Q15678	Q15678	S	710		DATMLIHSSESEEEEEEAPES
0.21696	18062000	0.128456		LRRC47	Leucine-rich repeat-containing protein 47	Q8N1G4	Q8N1G4	S	520	NKEEGsLsDtEAdAV	TLENKEEGSLSDTEADAVSGQ
0.21653	9682600	0.129218		MIS18BP1	Mis18-binding protein 1	H7C1S6;G5E9K5;Q6P0N0-2;Q6P0N0	H7C1S6	S	43;275;275;275	FVLESVDsADEQFQN	KDTFVLESVDSADEQFQNTNA
0.216478	1419100	0.129309		BAZ1B	Tyrosine-protein kinase BAZ1B	Q9UIG0-2;Q9UIG0	Q9UIG0-2	S	349;349	LKKsLsGsPLKVKNS	HVHLKKSLSGSPLKVKNSKNS
0.216399	12631000	0.12945		SLC35A5	Probable UDP-sugar transporter protein SLC35A5	Q9BS91	Q9BS91	S	416	ERLTKPKsDEsDEDt	EELERLTKPKSDESDEDTF__
0.216399	19605000	0.12945		SLC35A5	Probable UDP-sugar transporter protein SLC35A5	Q9BS91	Q9BS91	S	419	TKPKsDEsDEDtF__	ERLTKPKSDESDEDTF_____
0.216345	94383000	0.129547		SRSF10	Serine/arginine-rich splicing factor 10	O75494-2;O75494	O75494-2	S	255;256	sRsRsWtsPKssGH_	RSKSRSRSWTSPKSSGH____
0.216093	352420000	0.129995		KCTD12	BTB/POZ domain-containing protein KCTD12	Q96CX2	Q96CX2	S	185	tLELAsRsPsGGAAG	PSPTLELASRSPSGGAAGPLL
0.216093	8406800	0.129995		KCTD12	BTB/POZ domain-containing protein KCTD12	Q96CX2	Q96CX2	T	196	GAAGPLLtPsQsLDG	PSGGAAGPLLTPSQSLDGSRR
0.215986	7891800	0.130186		CDCA5	Sororin	H0YCL8;B5MBX0;Q96FF9	H0YCL8	S	22;75;75	VEVPAVQsPRRsPRI	AHAVEVPAVQSPRRSPRAAGP
0.215144	46306000	0.131696		PCM1	Pericentriolar material 1 protein	E7ETA6;Q15154-2;Q15154;E7EV56;E7EV93	E7ETA6	S	533;533;533;533;572	KDEEtEEsEYDsEHE	ENRKDEETEESEYDSEHENSE
0.215144	46306000	0.131696		PCM1	Pericentriolar material 1 protein	E7ETA6;Q15154-2;Q15154;E7EV56;E7EV93	E7ETA6	S	537;537;537;537;576	tEEsEYDsEHENsEP	DEETEESEYDSEHENSEPVTN
0.215144	46306000	0.131696		PCM1	Pericentriolar material 1 protein	E7ETA6;Q15154-2;Q15154;E7EV56;E7EV93	E7ETA6	T	530;530;530;530;569	ENRKDEEtEEsEYDs	AVNENRKDEETEESEYDSEHE
0.214901	88915000	0.132135		RAB11FIP1	Rab11 family-interacting protein 1	E7EX40;Q6WKZ4-2;Q6WKZ4-3;Q6WKZ4	E7EX40	T	133;133;281;281	SHKRtAstDLKQLNQ	DVMSHKRTASTDLKQLNQVNF
0.21472	2622500	0.132463		ZC3H13	Zinc finger CCCH domain-containing protein 13	Q5T200-2;Q5T200	Q5T200-2	S	879;879	EsRsLsPsHLtEDRQ	RPQESRSLSPSHLTEDRQGRW
0.214582	35046000	0.132711		TMPO	Lamina-associated polypeptide 2, isoform alpha;Thymopoietin;Thymopentin;Lamina-associated polypeptide 2, isoforms beta/gamma;Thymopoietin;Thymopentin	P42166;P42167;G5E972;H0YJH7;P42167-2	P42166;P42167	S	168;168;168;75;168	PLPtIsssAENtRQN	SSTPLPTISSSAENTRQNGSN
0.214487	3845600	0.132884		PLEKHA1		Q9HB21-2;Q5RGS4	Q9HB21-2	S	308;308	MRQARRLsNPCIQRY	ASSMRQARRLSNPCIQRYTSR
0.214357	38699000	0.13312		RANBP2	E3 SUMO-protein ligase RanBP2	P49792;E9PGT0;F8WBP7	P49792	S	21;21;21	SVQGstPsPRQKsMK	YIASVQGSTPSPRQKSMKGFY
0.214257	20811000	0.133302		UIMC1	BRCA1-A complex subunit RAP80	F2Z2T8;F8VQY2;Q96RL1-2;Q96RL1-3;Q96RL1;D6RCF3;H7BXP9;Q96RL1-4	F2Z2T8	S	385;463;297;385;463;182;93;93	FDLEREVsPGsRDIL	SETFDLEREVSPGSRDILDGV
0.214115	94368000	0.133561		SCAF11	Protein SCAF11	F8W028;F8VXG7;Q99590-2;Q99590	F8W028	S	779;647;524;839		KSQSPSPKNESARGRKKSRSQ
0.213897	2413400000	0.133959		NUCKS1	Nuclear ubiquitous casein and cyclin-dependent kinase substrate 1	Q9H1E3;Q9H1E3-2	Q9H1E3	S	181;141	LkAtVtPsPVkGKGk	KPRLKATVTPSPVKGKGKVGR
0.213846	7641100	0.134051		CFAP36	Cilia- and flagella-associated protein 36	B5MC35;B5MCA1;Q96G28;Q96G28-2	B5MC35	S	201;201;201;226	EAAIMNNsQGDGEHF	HSSEAAIMNNSQGDGEHFAHP
0.213824	9982400	0.134091		WDR44	WD repeat-containing protein 44	Q5JSH3-2;Q5JSH3;F8W913;H7BY83	Q5JSH3-2	S	344;344;319;244	PQRPRsNsGRELtDE	VMGPQRPRSNSGRELTDEEIL
0.213778	131580000	0.134177		NSUN5P2	Putative methyltransferase NSUN5C	Q3KNT7-3;C9JJU9;Q96P11-2;Q63ZY6-6;Q63ZY6	Q3KNT7-3	S	132;406;444;236;260	sAPERtPsPAPKRKK	AKASAPERTPSPAPKRKKRQQ
0.213778	131580000	0.134177		NSUN5P2	Putative methyltransferase NSUN5C	Q3KNT7-3;C9JJU9;Q96P11-2;Q63ZY6-6;Q63ZY6	Q3KNT7-3	T	130;404;442;234;258	kAsAPERtPsPAPKR;KAsAPERtPsPAPKR	SQAKASAPERTPSPAPKRKKR
0.213428	1313100	0.134818		WDFY3	WD repeat and FYVE domain-containing protein 3	Q8IZQ1-2;Q8IZQ1	Q8IZQ1-2	S	1923;1923		MVTDLDDEVGSPAEEFKAFAA
0.212386	7398300	0.136739		TMEM9	Transmembrane protein 9	B1ALM7;B1ALM8;B1ALM5;Q9P0T7	B1ALM7	S	137;144;140;137		HNEEENEDARSM_________
0.212322	151710000	0.136857		CTNND1	Catenin delta-1	E9PIE5;C9JZR2;F8WA43;O60716-8;O60716-7;O60716-5;O60716-3;O60716-6;O60716-4;O60716-2;O60716;O60716-24;O60716-23;O60716-21;O60716-19;O60716-22;O60716-20;O60716-16;O60716-18;O60716-15;O60716-17;O60716-13;O60716-11;O60716-14;O60716-12;O60716-10;O60716-9;O60716-32;O60716-31;O60716-29;O60716-27;O60716-30;O60716-28;O60716-26;O60716-25;E9PKY0	E9PIE5	S	346;346;346;346;346;346;346;346;346;346;346;245;245;245;245;245;245;292;245;292;245;292;292;292;292;292;292;23;23;23;23;23;23;23;23;23	LAQHERGsLAsLDsL	WAPLAQHERGSLASLDSLRKG
0.212322	220900000	0.136857		CTNND1	Catenin delta-1	E9PIE5;C9JZR2;F8WA43;O60716-8;O60716-7;O60716-5;O60716-3;O60716-6;O60716-4;O60716-2;O60716;O60716-24;O60716-23;O60716-21;O60716-19;O60716-22;O60716-20;O60716-16;O60716-18;O60716-15;O60716-17;O60716-13;O60716-11;O60716-14;O60716-12;O60716-10;O60716-9;O60716-32;O60716-31;O60716-29;O60716-27;O60716-30;O60716-28;O60716-26;O60716-25;E9PKY0	E9PIE5	S	349;349;349;349;349;349;349;349;349;349;349;248;248;248;248;248;248;295;248;295;248;295;295;295;295;295;295;26;26;26;26;26;26;26;26;26	HERGsLAsLDsLRkG	LAQHERGSLASLDSLRKGGPP
0.212322	189600000	0.136857		CTNND1	Catenin delta-1	E9PIE5;C9JZR2;F8WA43;O60716-8;O60716-7;O60716-5;O60716-3;O60716-6;O60716-4;O60716-2;O60716;O60716-24;O60716-23;O60716-21;O60716-19;O60716-22;O60716-20;O60716-16;O60716-18;O60716-15;O60716-17;O60716-13;O60716-11;O60716-14;O60716-12;O60716-10;O60716-9;O60716-32;O60716-31;O60716-29;O60716-27;O60716-30;O60716-28;O60716-26;O60716-25;E9PKY0	E9PIE5	S	352;352;352;352;352;352;352;352;352;352;352;251;251;251;251;251;251;298;251;298;251;298;298;298;298;298;298;29;29;29;29;29;29;29;29;29	GsLAsLDsLRkGGPP	HERGSLASLDSLRKGGPPPPN
0.212209	66000000	0.137068		NME1	Nucleoside diphosphate kinase A	P15531;P15531-2	P15531	S	120;145	GRNIIhGsDsVEsAE	IQVGRNIIHGSDSVESAEKEI
0.212134	120960000	0.137207		SPEN	Msx2-interacting protein	Q96T58	Q96T58	S	749	sQAERLPsDsERRLY	ASPSQAERLPSDSERRLYSRS
0.212088	54277000	0.137293		TUBA1B;TUBA1A	Tubulin alpha-1B chain;Tubulin alpha-1A chain	P68363;G3V1U9;Q71U36;F8VXZ4;F8VWX4;E7ET24	P68363	S	439;404;439;286;170;170	yEEVGVDsVEGEGEE	EKDYEEVGVDSVEGEGEEEGE
0.211515	15791000	0.138361		TFCP2;UBP1	Alpha-globin transcription factor CP2;Upstream-binding protein 1	F8VX55;Q12800-2;Q12800-3;Q12800-4;Q12800;C9JWL3;Q9NZI7-4;Q9NZI7	F8VX55	S	25;25;25;25;25;22;22;22		ESGLVQDFDASLSGIGQELGA
0.211515	5898600	0.138361		TFCP2;UBP1	Alpha-globin transcription factor CP2;Upstream-binding protein 1	F8VX55;Q12800-2;Q12800-3;Q12800-4;Q12800;C9JWL3;Q9NZI7-4;Q9NZI7	F8VX55	S	27;27;27;27;27;24;24;24		GLVQDFDASLSGIGQELGAGA
0.21123	2849600	0.138896		C2CD5	C2 domain-containing protein 5	Q86YS7;B4DRN7;H0YFE9;F5H3N1;Q86YS7-2;F5H2A1;F5H5R1;H0YGJ3	Q86YS7	S	260;260;63;62;260;260;260;59	AFLPACNsPsKEMKE	SPAAFLPACNSPSKEMKEIPF
0.211188	10037000	0.138975		SSRP1	FACT complex subunit SSRP1	Q08945	Q08945	S	437	LKEGMNPsyDEyADs	NRGLKEGMNPSYDEYADSDED
0.210913	43578000	0.139493		UBAP2L	Ubiquitin-associated protein 2-like	F8W726;Q14157-4;Q14157-1;Q14157-3;Q14157;Q14157-5	F8W726	S	409;391;398;398;398;398	DMGSTTQsPsLVQyD	SSWDMGSTTQSPSLVQYDLKN
0.210858	9980600	0.139596		UBAP2L	Ubiquitin-associated protein 2-like	F8W726;Q14157-4;Q14157-1;Q14157-3;Q14157;Q14157-5;C9JD99;F5GY23	F8W726	S	615;597;604;604;604;604;100;100	TQTRRYPssISssPQ;TQTRRyPssIsssPQ	QRSTQTRRYPSSISSSPQKDL
0.210858	17271000	0.139596		UBAP2L	Ubiquitin-associated protein 2-like	F8W726;Q14157-4;Q14157-1;Q14157-3;Q14157;Q14157-5;C9JD99;F5GY23	F8W726	S	619;601;608;608;608;608;104;104	RYPssISssPQKDLT;RyPssIsssPQkDLt	QTRRYPSSISSSPQKDLTQAK
0.210584	77641000	0.140114		PRKCD	Protein kinase C delta type;Protein kinase C delta type regulatory subunit;Protein kinase C delta type catalytic subunit	Q05655;Q05655-2	Q05655	S	645;676	LNEkARLsysDKNLI	QEFLNEKARLSYSDKNLIDSM
0.210515	6363500	0.140244		CDC25A	M-phase inducer phosphatase 1	C9JFR5;P30304-2;P30304	C9JFR5	S	204;165;205		GNFIPLFTPQSPVTATLSDED
0.210367	40586000	0.140524		NOLC1	Nucleolar and coiled-body phosphoprotein 1	Q14978;Q14978-3;Q14978-2	Q14978	S	643;644;653	DsRVADNsFDAkRGA	IEVDSRVADNSFDAKRGAAGD
0.209685	4866400	0.14182		EPS15L1	Epidermal growth factor receptor substrate 15-like 1	A2RRF3;Q9UBC2;Q9UBC2-2	A2RRF3	S	575;575;575	LDGAHGAsLtDLANL	DQVLDGAHGASLTDLANLSEG
0.209657	50877000	0.141875		ACTL6A	Actin-like protein 6A	O96019-2;O96019	O96019-2	S	191;233	kEAVREGsPANWkRk	IASKEAVREGSPANWKRKEKL
0.209426	281690000	0.142316		STUB1	E3 ubiquitin-protein ligase CHIP	H3BS86;Q9UNE7	H3BS86	S	19;19	RLGAGGGsPEksPsA	GGARLGAGGGSPEKSPSAQEL
0.20926	2132200	0.142633		MDC1	Mediator of DNA damage checkpoint protein 1	F8VV34;E7EVA7;Q14676-3;Q14676;E9PGY5;Q14676-2;F8W1C2;F8VZP8;F8VU38;Q14676-4	F8VV34	S	1533;1533;1533;1820;1556;1556;1386;1386;1386;797	RsLAtMDsPPHQKQP	SRKRSLATMDSPPHQKQPQRG
0.20914	7511200	0.142864		FAM103A1	RNMT-activating mini protein	Q9BTL3	Q9BTL3	S	36	yLKRPPEsPPIVEEW	YQEYLKRPPESPPIVEEWNSR
0.209005	27720000	0.143122		YEATS2	YEATS domain-containing protein 2	Q9ULM3	Q9ULM3	S	118	AIKKFLEsPsRSSsP	NHPAIKKFLESPSRSSSPANQ
0.208866	6281500	0.143389		CHEK2	Serine/threonine-protein kinase Chk2	B7ZBF7;B7ZBF6;O96017-8;O96017-7;O96017-4;O96017-12;O96017;O96017-9;F8WCV2;C9JFD7;B7ZBF8;E7EPP1;C9JFD8;O96017-10;O96017-3;O96017-6;O96017-5;O96017-11;O96017-2	B7ZBF7	T	68;68;68;68;68;68;68;68;68;68;78;68;68;68;68;68;68;68;68	SsLEtVstQELYsIP	GTLSSLETVSTQELYSIPEDQ
0.208458	31238000	0.144176		SORBS3	Vinexin	E5RHI2;O60504-2;H0YAZ3;H0YB51;H0YBA2;O60504	E5RHI2	S	202;202;56;155;216;544	ARsARHPssPsALRs	TAAARSARHPSSPSALRSPAD
0.208451	4967600000	0.144189		NUCKS1	Nuclear ubiquitous casein and cyclin-dependent kinase substrate 1	Q9H1E3;Q9H1E3-2	Q9H1E3	S	132;92	FQEKDsGsDEDFLME	EAPFQEKDSGSDEDFLMEDDD
0.208127	2480800	0.144817		PRPSAP2	Phosphoribosyl pyrophosphate synthase-associated protein 2	I3L275;C9JLZ5;I3L1T1;I3L3B8;I3L2J4;I3L331;I3L164;C9JDH0;E7EW35;C9JDU5;C9JJS3;C9K0K7;E7EPA1;B7ZKZ1;E7EMY2;O60256	I3L275	T	5;5;5;5;5;5;5;5;5;5;5;5;5;5;5;5	___MFCVtPPELETK	______MFCVTPPELETKMNI
0.208094	1149400	0.144882		LRCH1	Leucine-rich repeat and calponin homology domain-containing protein 1	Q9Y2L9-2;Q9Y2L9;F8W6F0	Q9Y2L9-2	T	568;568;603	EsIDPQFtIRRKMEQ	RNLESIDPQFTIRRKMEQMRE
0.208053	42016000	0.144961		NCL	Nucleolin	C9JWL1;C9JYW2;C9JLB1;C9J1H7;P19338;Q9BQ02	C9JWL1;P19338	S	51;51;51;51;67;67	sAkkVVVsPtkkVAV	AATSAKKVVVSPTKKVAVATP
0.208005	7318400	0.145054		TOX4	TOX high mobility group box family member 4	B4DPY8;O94842;F6TTN0	B4DPY8	S	492;515;443		TTLVPPTVESSPERPMNNSPE
0.207944	12252000	0.145172		UBAP2L	Ubiquitin-associated protein 2-like	F8W726;Q14157-4;Q14157-1;Q14157-3;Q14157;Q14157-5;C9JD99;F5GY23	F8W726	S	541;523;530;530;530;530;26;26		ALQFGSEPVLSDYESTPTTSA
0.207516	45020000	0.146006		PNISR	Arginine/serine-rich protein PNISR	Q8TF01	Q8TF01	S	726	RTFsRsGsISVkIIR	ESERTFSRSGSISVKIIRHDS
0.20716	41742000	0.146701		USP9X	Probable ubiquitin carboxyl-terminal hydrolase FAF-X	Q93008-1;Q93008	Q93008-1	S	2547;2563	yEGsEEVsPPQtKDQ	QENYEGSEEVSPPQTKDQ___
0.207149	4172900	0.146723		ILF3	Interleukin enhancer-binding factor 3	Q12906;G5E9M5	Q12906	S	799;803	sPGGGGGsDyNyESK	SYNSPGGGGGSDYNYESKFNY
0.206891	163250000	0.147228		SRSF5	Serine/arginine-rich splicing factor 5	Q13243-3;Q13243	Q13243-3	S	247;250	GsssRsKsPAsVDRQ	QKRGSSSRSKSPASVDRQRSR
0.206891	54051000	0.147228		SRSF5	Serine/arginine-rich splicing factor 5	Q13243-3;Q13243	Q13243-3	S	250;253	sRsKsPAsVDRQRSR	GSSSRSKSPASVDRQRSRSRS
0.206747	9792000	0.147511		RBMX;RBMXL1	RNA-binding motif protein, X chromosome;RNA-binding motif protein, X chromosome, N-terminally processed;RNA binding motif protein, X-linked-like-1	P38159-2;P38159;B3KRG5;H3BUY5;Q96E39	P38159-2;Q96E39	S	302;315;180;187;315	sRyDDysssRDGyGG	GGSSRYDDYSSSRDGYGGSRD
0.206659	4268400	0.147684		KIAA1467	Uncharacterized protein KIAA1467	A2RU67	A2RU67	S	30	DPLtQADsDEsEDDL	GEYDPLTQADSDESEDDLVLN
0.206659	4268400	0.147684		KIAA1467	Uncharacterized protein KIAA1467	A2RU67	A2RU67	S	33	tQADsDEsEDDLVLN	DPLTQADSDESEDDLVLNLQK
0.206432	17476000	0.148131		UBALD2	UBA-like domain-containing protein 2	Q8IYN6	Q8IYN6	S	104		SNSPMTAAACSPPANFSPFWA
0.206247	4738400	0.148496		RALBP1	RalA-binding protein 1	E7ENF8;Q15311	E7ENF8	S	48;48	LYRtGEPsPPHDILH	FPGLYRTGEPSPPHDILHEPP
0.206211	3227800	0.148568		TSC2	Tuberin	P49815-4;P49815;H3BMQ0;B4DIL8;P49815-6;P49815-5;P49815-3;P49815-2;H3BQK4	P49815-4	S	1429;1452;1396;1337;1349;1385;1408;1409;180	LPSssPRsPsGLRPR	EGPLPSSSPRSPSGLRPRGYT
0.206142	4527900	0.148704		GTPBP1	GTP-binding protein 1	O00178;F8WAZ4	O00178	S	44;44	RLHGGFDsDCsEDGE	AAARLHGGFDSDCSEDGEALN
0.206142	4527900	0.148704		GTPBP1	GTP-binding protein 1	O00178;F8WAZ4	O00178	S	47;47	GGFDsDCsEDGEALN	RLHGGFDSDCSEDGEALNGEP
0.205991	8564700	0.149004		DBNDD1	Dysbindin domain-containing protein 1	H3BLZ2;Q9H9R9;Q9H9R9-2;Q9H9R9-3	H3BLZ2	S	101;95;115;215	LAEVFADsDDENLNT	DQELAEVFADSDDENLNTESP
0.205443	9356000	0.150092		SAFB	Scaffold attachment factor B1	Q15424;F5GZU3;F5H1L1;F5H0H3	Q15424	S	617;447;512;548		KVKEPRKSRDSESHSRVRERS
0.205279	28160000	0.150419		TPX2	Targeting protein for Xklp2	Q9ULW0;Q96RR5	Q9ULW0	S	738;774	QPLtVPVsPKFSTRF	SSDQPLTVPVSPKFSTRFHC_
0.205208	9145000	0.150561		POLR2A	DNA-directed RNA polymerase II subunit RPB1	P24928	P24928	T	1919	tsPtysPtsPKysPt	YSPTSPTYSPTSPKYSPTSPT
0.205189	28139000	0.1506		AKAP12	A-kinase anchor protein 12	Q02952-3;Q02952-2;Q02952	Q02952-3	S	266;273;371	sAHEPRLsAEyEkVE	PAESAHEPRLSAEYEKVELPS
0.204712	62266000	0.151554		MPHOSPH8	M-phase phosphoprotein 8	F5H8H9;Q99549;Q99549-2	F5H8H9	S	85;85;85	VRWKGYtsDDDTWEP	LYKVRWKGYTSDDDTWEPEIH
0.204634	13355000	0.151711		VRK3;MICALL2	Inactive serine/threonine-protein kinase VRK3;MICAL-like protein 2	E7EMG6;Q8IV63-2;Q8IV63;Q8IV63-3;Q8IY33-4;Q8IY33-2;Q8IY33-5;D3YTD2;Q8IY33	E7EMG6	S	129;129;129;79;272;230;60;60;272	sPQKtSCsPQKTRQs	TRGSPQKTSCSPQKTRQSPQT
0.204532	26291000	0.151916		ULK1	Serine/threonine-protein kinase ULK1	O75385	O75385	S	477	PLGFARAsPsPPAHA	STSPLGFARASPSPPAHAEHG
0.204532	26291000	0.151916		ULK1	Serine/threonine-protein kinase ULK1	O75385	O75385	S	479	GFARAsPsPPAHAEH	SPLGFARASPSPPAHAEHGGV
0.204465	11476000	0.152051		TRAP1	Heat shock protein 75 kDa, mitochondrial	I3L3L4;Q12931	I3L3L4	S	60;60		AWSLQAGRLFSTQTAEDKEEP
0.203835	37679000	0.153323		RGPD5;RGPD8;RANBP2;RGPD3;RGPD4;RGPD1;RGPD2	RANBP2-like and GRIP domain-containing protein 5/6;RANBP2-like and GRIP domain-containing protein 8;E3 SUMO-protein ligase RanBP2;RanBP2-like and GRIP domain-containing protein 3;RanBP2-like and GRIP domain-containing protein 4;RANBP2-like and GRIP domain-containing protein 1;RANBP2-like and GRIP domain-containing protein 2	Q99666;O14715;F8W705;Q99666-2;P49792;E9PGT0;A6NKT7;Q7Z3J3;F8VYC4;P0DJD0;P0DJD1;C9JX22;B4DZH4	Q99666;P49792	S	790;790;790;790;790;790;791;791;789;781;789;549;549	tKysLsPsKsYKysP;TKysLsPsKsYKysP;tRysLsPsKsyKysP;TKysLsPsKsyKysP	PSPTKYSLSPSKSYKYSPETP
0.20382	8667500	0.153352		TRIM28	Transcription intermediary factor 1-beta	Q13263-2;Q13263	Q13263-2	S	742;824	LPGAGLssQELsGGP	PMSLPGAGLSSQELSGGPGDG
0.203804	168330000	0.153385		RSF1	Remodeling and spacing factor 1	Q96T23-3;Q96T23-2;Q96T23;H0YER1;H0YCN2	Q96T23-3	S	221;442;473;472;274	ETKEEsYsPSKDRNI	KFYETKEESYSPSKDRNIITE
0.203536	15490000	0.153929		ATG4B	Cysteine protease ATG4B	F8WD71;F5H7P2;Q9Y4P1	F8WD71	S	297;357;371		CPDVLNLSLDSSDVERLERFF
0.203526	8536100	0.15395		CDK11B;CDK11A	Cyclin-dependent kinase 11B;Cyclin-dependent kinase 11A	P21127-9;P21127-2;P21127;P21127-6;P21127-8;P21127-3;E7ESP2;E9PFJ2;G8JLH1;Q5QPR4;Q5QPR3;Q9UQ88-4;Q9UQ88-3;Q9UQ88-2;Q9UQ88;Q9UQ88-9	P21127-9;Q5QPR4;Q9UQ88-9	S	38;72;72;38;72;72;72;72;72;38;72;72;72;72;72;15	sPyRREDsMEDRGEE	IRNSPYRREDSMEDRGEEDDS
0.203499	4048200	0.154004		ABCB4	Multidrug resistance protein 3	A4D1D5;P21439-2;P21439	A4D1D5	S	69;69;69		LGTIMAIAHGSGLPLMMIVFG
0.203432	16288000	0.15414		FAM208B	Protein FAM208B	Q5VWN6-2;Q5VWN6	Q5VWN6-2	S	484;1289	IDLALTIsPPtsPRE	DSDIDLALTISPPTSPREEMP
0.203432	16288000	0.15414		FAM208B	Protein FAM208B	Q5VWN6-2;Q5VWN6	Q5VWN6-2	T	487;1292	ALTIsPPtsPREEMP	IDLALTISPPTSPREEMPAGE
0.202704	97238000	0.155625		MYH14	Myosin-14	F2Z2U9;F2Z2U8;G8JLL9;Q7Z406-4;Q7Z406;Q7Z406-6;Q7Z406-2	F2Z2U9	S	1773;2022;2030;1773;1989;1997;2030	PsPEPEGsPPAHPQ_	GSGPSPEPEGSPPAHPQ____
0.202616	984710	0.155806		GORASP1	Golgi reassembly-stacking protein 1	B3KPY8;B4E1H8;Q9BQQ3	B3KPY8	S	242;302;397		TLPDSLTSAASPEDGLSAELL
0.202579	110230000	0.155883		MAPRE3	Microtubule-associated protein RP/EB family member 3	C9JB30;Q9UPY8-2;Q9UPY8	C9JB30	S	162;147;162	tAVPQRtsPtGPKNM	LIGTAVPQRTSPTGPKNMQTS
0.202505	5205300	0.156033		TCEB2	Transcription elongation factor B polypeptide 2	B8ZZU8;I3L0M9;Q15370	B8ZZU8	S	106;133;111		DVMKPQDSGSSANEQAVQ___
0.20241	11945000	0.156229		SETD2	Histone-lysine N-methyltransferase SETD2	F2Z317;Q9BYW2;C9JG86;F5H340;Q9BYW2-3;Q9BYW2-2;H7BZ93;H7BXT4;H7C3H4	F2Z317	S	744;744;700;744;744;744;462;616;378	MLHKKsEsPFREtEP	DTCMLHKKSESPFRETEPLVS
0.20241	11945000	0.156229		SETD2	Histone-lysine N-methyltransferase SETD2	F2Z317;Q9BYW2;C9JG86;F5H340;Q9BYW2-3;Q9BYW2-2;H7BZ93;H7BXT4;H7C3H4	F2Z317	S	754;754;710;754;754;754;472;626;388	REtEPLVsPHQDKLM	SPFRETEPLVSPHQDKLMSMP
0.201821	42871000	0.157441		KIAA1671	Uncharacterized protein KIAA1671	Q9BY89;Q9BY89-2	Q9BY89	S	1701;208	KsPRKEEsDEEETAS	TEEKSPRKEESDEEETASKAE
0.201351	2881900	0.158415		MKI67	Antigen KI-67	F5H4V4;P46013;P46013-2;E7EN66	F5H4V4	S	647;648;288;223	MICSkRRsGAsEANL	ILQMICSKRRSGASEANLIVA
0.201224	1710000	0.158679		TNRC18	Trinucleotide repeat-containing gene 18 protein	H9KVB4;O15417;C9JS29;O15417-2;B5ME58;O15417-3	H9KVB4	T	1250;1250;305;1250;305;186	LDLGVQLtPETLVEA	TAALDLGVQLTPETLVEAKEE
0.200788	35453000	0.159586		PIP5K1A	Phosphatidylinositol 4-phosphate 5-kinase type-1 alpha	A6PW57;Q99755-4;Q99755-3;Q99755	A6PW57	S	456;428;455;468	KKFRSGSsFSRRAGs	SPSKKFRSGSSFSRRAGSSGN
0.200773	16101000	0.159618		WRN	Werner syndrome ATP-dependent helicase	Q14191	Q14191	S	453	MEMLKHLsPNDNEND	DLEMEMLKHLSPNDNENDTSY
0.200355	20425000	0.160494		RBBP7	Histone-binding protein RBBP7	Q16576;Q16576-2;E9PC52;Q5JNZ6	Q16576	S	413;457;404;73	NIYNDEEsDVtTSEL	MAENIYNDEESDVTTSELEGQ
0.200148	2897200000	0.160928		RPS6	40S ribosomal protein S6	P62753;A2A3R5	P62753	S	235;204	IAKRRRLssLRAsts	QEQIAKRRRLSSLRASTSKSE
0.200022	3252300	0.161193		NEK4	Serine/threonine-protein kinase Nek4	E7EX48;P51957-3;P51957;H7C5M0	E7EX48	S	372;372;461;52	KDQSLALsPKLECSG	QKPKDQSLALSPKLECSGTIL
0.199948	15582000	0.161347		PNMAL1	PNMA-like protein 1	Q86V59;Q86V59-2	Q86V59	S	333;333	AEsPGGAsEsDQDGG	RAEAESPGGASESDQDGGHES
0.199948	15582000	0.161347		PNMAL1	PNMA-like protein 1	Q86V59;Q86V59-2	Q86V59	S	335;335	sPGGAsEsDQDGGHE	EAESPGGASESDQDGGHESPP
0.199804	7510000	0.161651		DSP	Desmoplakin	P15924-2;P15924	P15924-2	S	2221;2820	LPsPyNMssAPGsRS	SKGLPSPYNMSSAPGSRSGSR
0.199804	7510000	0.161651		DSP	Desmoplakin	P15924-2;P15924	P15924-2	S	2226;2825	NMssAPGsRSGsRsG	SPYNMSSAPGSRSGSRSGSRS
0.199742	12779000	0.161781		USP47	Ubiquitin carboxyl-terminal hydrolase 47	Q96K76-2;E9PM46;Q96K76;F5H2L6	Q96K76-2	S	845;913;933;130	LEQHIQtsDPENFQS	NRELEQHIQTSDPENFQSEER
0.199637	34850000	0.162003		DDB2	DNA damage-binding protein 2	Q92466-3;Q92466-2;Q92466-5;Q92466-4;Q92466	Q92466-3	S	24;24;24;24;24	LRPRNKRsRsPLELE	EIVLRPRNKRSRSPLELEPEA
0.199637	34850000	0.162003		DDB2	DNA damage-binding protein 2	Q92466-3;Q92466-2;Q92466-5;Q92466-4;Q92466	Q92466-3	S	26;26;26;26;26	PRNKRsRsPLELEPE	VLRPRNKRSRSPLELEPEAKK
0.199631	4576400	0.162017		BCAR1	Breast cancer anti-estrogen resistance protein 1	H3BN62;F5H855;F5GXV6;F5GXA2;P56945;F5H7Z0;P56945-2;F8WA69;E9PCV2;E9PCL5	H3BN62	S	183;326;207;353;355;355;373;373;373;401	LAAPPPDsPPAEDVy	PLVLAAPPPDSPPAEDVYDVP
0.19916	39413000	0.163014		NFATC2IP	NFATC2-interacting protein	Q8NCF5	Q8NCF5	S	54	SVDLVtDsDEEILEV	DVVSVDLVTDSDEEILEVATA
0.199059	17747000	0.163228		DYRK1A	Dual specificity tyrosine-phosphorylation-regulated kinase 1A	F8WAP0;Q13627-2;Q13627;Q13627-5	F8WAP0	S	301;520;529;529	SNSGRARsDPTHQHR	SGTSNSGRARSDPTHQHRHSG
0.199031	6300800	0.163287		NOX3	NADPH oxidase 3	Q9HBY0	Q9HBY0	S	464		DLLLSLETRMSEQGKTHFLSY
0.198944	16657000	0.163472		WDR76	WD repeat-containing protein 76	C9JE56;Q9H967	C9JE56	S	82;146		VDVESSQDGDSDEDTTPSLDF
0.198877	41976000	0.163614		PPIG	Peptidyl-prolyl cis-trans isomerase G	E9PG73;Q13427	E9PG73	S	702;717	EDEKIRssVEkENQk	KNKEDEKIRSSVEKENQKSKG
0.198669	1505200	0.164056		DCP1B	mRNA-decapping enzyme 1B	B4DRD1;Q8IZD4	B4DRD1	S	409;511	tPLFQVIsPQRIPAT	EQQTPLFQVISPQRIPATAAP
0.19864	245690000	0.164119		DENR	Density-regulated protein	F8VVL1;O43583	F8VVL1	S	73;73	AKLtVENsPKQEAGI	NEFAKLTVENSPKQEAGISEG
0.198275	4403300	0.164899		CEP131	Centrosomal protein of 131 kDa	Q9UPN4-3;Q9UPN4-2	Q9UPN4-3	S	496;496	sEEDDAssLTADNLE	AWASEEDDASSLTADNLEKFG
0.198223	1379600000	0.16501		NOC2L	Nucleolar complex protein 2 homolog	Q9Y3T9	Q9Y3T9	S	58	DKPGGsPsAsRRKGR	RSPDKPGGSPSASRRKGRASE
0.198177	8724500	0.165108		AMPD2	AMP deaminase 2	H0Y360;Q01433-3;E9PNG0;Q01433-2;Q01433-4;Q01433;H0YF16	H0Y360	S	857;756;757;794;800;875;227	EEAGITMsPGPQ___	TIPEEAGITMSPGPQ______
0.198037	2380400000	0.165408		RNPS1	RNA-binding protein with serine-rich domain 1	H3BUL0;H3BMM9;H3BTC0;Q15287;H3BMS0;Q15287-3;Q15287-2;H3BV80	H3BUL0	S	155;155;155;155;132;118;132;61	EKERKRRsPsPKPtK	KRDEKERKRRSPSPKPTKVHI
0.19791	1293400000	0.16568		NOC2L	Nucleolar complex protein 2 homolog	Q9Y3T9	Q9Y3T9	S	56	sPDKPGGsPsAsRRK	AARSPDKPGGSPSASRRKGRA
0.19789	7806900	0.165723		ZNF711	Zinc finger protein 711	F5H896;Q9Y462;Q9Y462-2;Q9Y462-3	F5H896	S	301;459;489;505	TRRyREAsPLSSNKL	TEYTRRYREASPLSSNKLILR
0.197364	21307000	0.166857		PNN	Pinin	Q9H307;G3V5F0;G3V579	Q9H307	S	66;66;66	LLLrrGFsDsGGGPP	RGSLLLRRGFSDSGGGPPAKQ
0.197287	340650000	0.167024		RBM15	Putative RNA-binding protein 15	Q96T37-2;Q96T37-3;Q96T37	Q96T37-2	S	656;656;656	GGRHLDRsPEsDRPR	EESGGRHLDRSPESDRPRKRH
0.197199	52564000	0.167213		ZNF768	Zinc finger protein 768	Q9H5H4;B7Z2Y7;H3BS42	Q9H5H4	S	125;94;94	sPRyEPQsPGyEPRs	ESQSPRYEPQSPGYEPRSPGY
0.197193	196440000	0.167226		HTATSF1	HIV Tat-specific factor 1	O43719;E9PFP2	O43719	S	498;498	VRGsEEDsPKKESkk	GNPVRGSEEDSPKKESKKKTL
0.197168	38742000	0.167279		GTF3C1	General transcription factor 3C polypeptide 1	Q12789;Q12789-3;H7BYG6	Q12789	S	1062;1062;1060	CPRVRKNsstDQGsD	VVRCPRVRKNSSTDQGSDEEG
0.19708	3886200	0.167471		PPFIA1	Liprin-alpha-1	Q13136-2;Q13136;F5H1G2	Q13136-2	S	1172;1172;669	RVTSSMssPsMQPKK	ANFRVTSSMSSPSMQPKKMQM
0.19685	26249000	0.167969		BCOR	BCL-6 corepressor	Q6W2J9-4;Q6W2J9-2;Q6W2J9;H7BYY2;Q6W2J9-3	Q6W2J9-4	S	423;423;423;423;423	QDRKDGssPPLLEKQ	TAVQDRKDGSSPPLLEKQTVT
0.196686	1162600000	0.168325		GTF2I	General transcription factor II-I	B4DH52;P78347-2;P78347-4;P78347-3;P78347	B4DH52	S	669;633;653;654;674	QsPKRPRsPGSNSKV;QsPKRPRsPGsNsKV	KALQSPKRPRSPGSNSKVPEI
0.196616	10164000	0.168477		GPATCH2	G patch domain-containing protein 2	Q9NW75-2;Q9NW75	Q9NW75-2	S	115;115	NNNKKDHsDsDDQML	ENHNNNKKDHSDSDDQMLVAK
0.196616	10164000	0.168477		GPATCH2	G patch domain-containing protein 2	Q9NW75-2;Q9NW75	Q9NW75-2	S	117;117	NKKDHsDsDDQMLVA	HNNNKKDHSDSDDQMLVAKRR
0.196241	66037000	0.169293		CDC42EP1	Cdc42 effector protein 1	Q00587-2;Q00587	Q00587-2	S	343;350	VLPQARAsWEsLDEE	RVEVLPQARASWESLDEEWRA
0.196241	59834000	0.169293		CDC42EP1	Cdc42 effector protein 1	Q00587-2;Q00587	Q00587-2	S	346;353	QARAsWEsLDEEWRA	VLPQARASWESLDEEWRAPQA
0.19567	107480000	0.170543		POGZ	Pogo transposable element with ZNF domain	F5H8H4;Q7Z3K3-5;E9PM80;Q7Z3K3-2;Q7Z3K3-3;B7ZBY5;Q7Z3K3	F5H8H4	S	729;1272;1305;1314;1323;1358;1367	sGEHsEsstPRPRSS	LKLSGEHSESSTPRPRSSPEE
0.19567	8278900	0.170543		PTPN13	Tyrosine-protein phosphatase non-receptor type 13	Q12923-3;Q12923;Q12923-4	Q12923-3	S	1029;1029;1029	NNsKsVAsLNRsPER	TKLNNSKSVASLNRSPERRKH
0.19567	8278900	0.170543		PTPN13	Tyrosine-protein phosphatase non-receptor type 13	Q12923-3;Q12923;Q12923-4	Q12923-3	S	1033;1033;1033	sVAsLNRsPERRKHE	NSKSVASLNRSPERRKHESDS
0.195627	23411000	0.170638		PVR	Poliovirus receptor	P15151-3;P15151-2;P15151	P15151-3	S	355;363;408		YSAVSRENSSSQDPQTEGTR_
0.1954	5225100	0.171136		COPS3	COP9 signalosome complex subunit 3	B4DY81;Q9UNS2	B4DY81	S	387;407	NPQFVQksMGsQEDD	ITVNPQFVQKSMGSQEDDSGN
0.195168	11695000	0.171649		NCAPH2	Condensin-2 complex subunit H2	E5RJN3;E5RJ71;G3XAG4;Q6IBW4-2;Q6IBW4;Q6IBW4-4;Q6IBW4-5	E5RJN3	S	212;246;246;224;246;246;246	FSQEPGPsPEGPMPL	ALGFSQEPGPSPEGPMPLGGG
0.195114	17944000	0.171767		HLCS	Biotin--protein ligase;Biotin--[methylmalonyl-CoA-carboxytransferase] ligase;Biotin--[propionyl-CoA-carboxylase [ATP-hydrolyzing]] ligase;Biotin--[methylcrotonoyl-CoA-carboxylase] ligase;Biotin--[acetyl-CoA-carboxylase] ligase	P50747	P50747	S	124	IESVKFAsAENIPDL	NSTIESVKFASAENIPDLPYD
0.19503	27864000	0.171952		HNRNPL	Heterogeneous nuclear ribonucleoprotein L	P14866;A6NIT8;B4DPK8;B4DVF8	P14866	S	185;52;113;52	KISRPGDsDDsRSVN	TSQKISRPGDSDDSRSVNSVL
0.194676	152270000	0.172734		SRSF7	Serine/arginine-rich splicing factor 7	C9JAB2;G5E9M3;Q16629;H7C1N1;H7BZZ6	C9JAB2	S	181;181;181;40;65	AsLRRsRsGsIkGsR	SRSASLRRSRSGSIKGSRSPS
0.194676	152270000	0.172734		SRSF7	Serine/arginine-rich splicing factor 7	C9JAB2;G5E9M3;Q16629;H7C1N1;H7BZZ6	C9JAB2	S	183;183;183;42;67		SASLRRSRSGSIKGSRSPSRS
0.19459	12716000	0.172927		CLSPN	Claspin	E7ESG2;Q9HAW4-2;Q9HAW4-3;Q9HAW4	E7ESG2	S	757;746;810;810	AGGFRsPsPGLFRAS	FPTAGGFRSPSPGLFRASLVS
0.194467	517060000	0.1732		SRRM1	Serine/arginine repetitive matrix protein 1	E9PCT1;A9Z1X7;Q8IYB3;Q8IYB3-2	E9PCT1	S	755;752;743;741	AAsPsPQsVRRVsss	IKKAASPSPQSVRRVSSSRSV
0.194464	4437600	0.173206		HARS2	Probable histidine--tRNA ligase, mitochondrial	D6RJE6;B4DDY8;P49590;D6RB22;E9PG66	D6RJE6	S	73;42;67;73;67	PKGtRDLsPQHMVVR	IKTPKGTRDLSPQHMVVREKI
0.194366	226870000	0.173422		HIST1H1E	Histone H1.4	P10412	P10412	T	146	KkATGAAtPkKSAKK	KKPKKATGAATPKKSAKKTPK
0.194351	206960000	0.173456		SCML2	Sex comb on midleg-like protein 2	B4DZR9;Q9UQR0	B4DZR9	S	235;267	AsQHsMQsPQKTTLI	PSEASQHSMQSPQKTTLILPT
0.194235	716990000	0.173714		FUBP1	Far upstream element-binding protein 1	B4E0X8;B4DT31;Q96AE4	B4E0X8	S	615;651;630	AAyyAQtsPQGMPQH	RQQAAYYAQTSPQGMPQHPPA
0.194223	113170000	0.17374		CNOT3	CCR4-NOT transcription complex subunit 3	H7C148;O75175-3;O75175-2;O75175	H7C148	S	221;118;299;299	tDsEVsQsPAKNGSK	GRSTDSEVSQSPAKNGSKPVH
0.194103	92474000	0.174008		LRRFIP1	Leucine-rich repeat flightless-interacting protein 1	Q32MZ4-3;Q32MZ4-2;Q32MZ4	Q32MZ4-3	S	658;690;714	IDGAtQssPAEPKsE	NAKIDGATQSSPAEPKSEDAD
0.193851	682170000	0.174569		THUMPD1	THUMP domain-containing protein 1	H3BNW0;Q9NXG2	H3BNW0	S	88;88	KDQQPsGsEGEDDDA	FTDKDQQPSGSEGEDDDAEAA
0.193472	2605500	0.175418		CAMKK2	Calcium/calmodulin-dependent protein kinase kinase 2	G8JLD8;Q96RR4-5;Q96RR4-3;Q96RR4-6;Q96RR4-2;Q96RR4-4;Q96RR4-7;Q96RR4	G8JLD8	S	119;136;136;136;136;136;136;136	sPVSsPQsSPRLPRR;sPVssPQssPRLPRR	LPYSPVSSPQSSPRLPRRPTV
0.193374	32711000	0.175639		TPR	Nucleoprotein TPR	P12270	P12270	S	1890	TQVYNQDsQDsIGEG	EVETQVYNQDSQDSIGEGVTQ
0.193374	48753000	0.175639		TPR	Nucleoprotein TPR	P12270	P12270	S	1893	YNQDsQDsIGEGVTQ	TQVYNQDSQDSIGEGVTQGDY
0.193216	5256300	0.175992		CAD	CAD protein;Glutamine-dependent carbamoyl-phosphate synthase;Aspartate carbamoyltransferase;Dihydroorotase	F8VPD4;P27708;H7BZB3	F8VPD4	S	1837;1900;205	PPVPRQAsPQNLGtP	YPPPPVPRQASPQNLGTPGLL
0.19314	291690000	0.176163		CBX3	Chromobox protein homolog 3	Q13185	Q13185	S	176	EERLtWHsCPEDEAQ	AFYEERLTWHSCPEDEAQ___
0.193028	606780000	0.176414		SRRM2	Serine/arginine repetitive matrix protein 2	Q9UQ35;Q9UQ35-2;I3L4U6;E7EU37	Q9UQ35	S	2692;2274;18;173	LRDsRsLsysPVERR	IDSLRDSRSLSYSPVERRRPS
0.192164	16365000	0.178367		RPA1	Replication protein A 70 kDa DNA-binding subunit;Replication protein A 70 kDa DNA-binding subunit, N-terminally processed	P27694;I3L4R8	P27694	S	384;140	AIKGARVsDFGGRSL	PVLAIKGARVSDFGGRSLSVL
0.192076	2493200000	0.178568		NOC2L	Nucleolar complex protein 2 homolog	Q9Y3T9	Q9Y3T9	S	49	EAREAARsPDKPGGs	ETREAREAARSPDKPGGSPSA
0.191826	9027600	0.179137		ZNF638	Zinc finger protein 638	Q14966-3;Q14966;C9JBI6;F5H330;Q14966-2;Q14966-4	Q14966-3	S	383;383;383;489;383;383	QADIPIRsPFGIVKA	YQSQADIPIRSPFGIVKASWL
0.191819	26590000	0.179152		TOP2B	DNA topoisomerase 2-beta	Q02880-2;Q02880;B4DLV2	Q02880-2	S	1456;1461;313	sQKsEDDsAKFDsNE	PSYSQKSEDDSAKFDSNEEDS
0.191461	84403000	0.179969		POLR2A	DNA-directed RNA polymerase II subunit RPB1	P24928	P24928	S	1864	sPKysPtsPKysPts	TPTSPKYSPTSPKYSPTSPKY
0.191452	159330000	0.179989		C9orf142	Protein PAXX	Q9BUH6	Q9BUH6	S	148	AAEEtAVsPRKsPRP	RLAAAEETAVSPRKSPRPAGP
0.191222	7576700	0.180515		ZNF609	Zinc finger protein 609	O15014	O15014	S	758	CRAEEGKsPFREssG	GKVCRAEEGKSPFRESSGDGM
0.191121	121550000	0.180746		SET	Protein SET	Q01105;B2REB8;A6NGV1;Q5VXV2;Q01105-2	Q01105;Q01105-2	S	183;158;159;161;170		WKSGKDLTKRSSQTQNKASRK
0.1911	9075800000	0.180794		CANX	Calnexin	B4E2T8;P27824	B4E2T8	S	446;554	kLEEKQKsDAEEDGG	GEEKLEEKQKSDAEEDGGTVS
0.190973	47062000	0.181085		MARCKS	Myristoylated alanine-rich C-kinase substrate	P29966	P29966	S	101	AAPEAGAsPVEkEAP	AAAAAPEAGASPVEKEAPAEG
0.190845	12466000	0.181381		SRRM1		E9PCT1;A9Z1X7	E9PCT1	S	550;547	QMGkRWQsPVtKSGR	PRMQMGKRWQSPVTKSGRRRR
0.190639	25419000	0.181852		MATR3	Matrin-3	D6REM6;A8MXP9;P43243;D6R991	D6REM6	S	211;211;211;211	HGsRsQEsGyyDRMD	DYDHGSRSQESGYYDRMDYED
0.190576	19587000	0.182		DDX23	Probable ATP-dependent RNA helicase DDX23	F8W1J5;F8VVA2;Q9BUQ8	F8W1J5	S	106;106;106	RDKDRKRssLsPGRG	GHRRDKDRKRSSLSPGRGKDF
0.190576	19055000	0.182		RAD9A	Cell cycle checkpoint control protein RAD9A	Q99638	Q99638	S	375	SILAPVRsPQGPsPV	FFGSILAPVRSPQGPSPVLAE
0.190576	19055000	0.182		RAD9A	Cell cycle checkpoint control protein RAD9A	Q99638	Q99638	S	380	VRsPQGPsPVLAEDs	LAPVRSPQGPSPVLAEDSEGE
0.190576	51758000	0.182		RAD9A	Cell cycle checkpoint control protein RAD9A	Q99638	Q99638	S	387	sPVLAEDsEGEG___	QGPSPVLAEDSEGEG______
0.190236	10438000	0.182783		RFC1	Replication factor C subunit 1	P35251-2;P35251	P35251-2	S	312;312	DKIGEVssPKAssKL	SSADKIGEVSSPKASSKLAIM
0.190122	4148900	0.183047		EYA3	Eyes absent homolog;Eyes absent homolog 3	B1APR7;Q99504-2;B4DNZ7;B4DIR7;Q8IVX7;Q99504	B1APR7	S	69;99;172;179;179;225		SSFGVTGQTNSDAESTTLAAT
0.189951	18398000	0.183443		VIM	Vimentin	P08670;B0YJC4;F5H288	P08670	S	66;66;53	GVyAtrssAVRLRss	SPGGVYATRSSAVRLRSSVPG
0.189915	13297000	0.183527		INO80B;INO80B-WBP1	INO80 complex subunit B	Q9C086;B8ZZ93;B8ZZH7;F8WCL7	Q9C086	S	127;127;132;127	RAWLDEDsNLsPsPL	EQYRAWLDEDSNLSPSPLRDL
0.189915	21603000	0.183527		INO80B;INO80B-WBP1	INO80 complex subunit B	Q9C086;B8ZZ93;B8ZZH7;F8WCL7	Q9C086	S	130;130;135;130	LDEDsNLsPsPLRDL	RAWLDEDSNLSPSPLRDLSGG
0.189915	5319200	0.183527		INO80B;INO80B-WBP1	INO80 complex subunit B	Q9C086;B8ZZ93;B8ZZH7;F8WCL7	Q9C086	S	132;132;137;132	EDsNLsPsPLRDLsG	WLDEDSNLSPSPLRDLSGGLG
0.189741	224760000	0.183929		SRSF1	Serine/arginine-rich splicing factor 1	Q07955	Q07955	S	242	PRysPRHsRsRsRt_	RGSPRYSPRHSRSRSRT____
0.189601	23188000	0.184255		SLC38A2	Sodium-coupled neutral amino acid transporter 2	F8VUY8;Q96QD8	F8VUY8	S	19;19	sPDEDsssyssNsDF	FSISPDEDSSSYSSNSDFNYS
0.189576	80904000	0.184313		TOP2A	DNA topoisomerase 2-alpha	C9J5P2;P11388;P11388-2;P11388-3;P11388-4;H7BXX8;H7BXH5	C9J5P2	S	1283;1247;1273;1283;1328;1270;1327	kNENtEGsPQEDGVE	KKIKNENTEGSPQEDGVELEG
0.189445	5209300	0.184619		NCOR1	Nuclear receptor corepressor 1	E7EVK1;O75376-2;O75376;B4DJ25	E7EVK1	S	1884;1877;1980;564	IEVIsPAssPAPPQE	SDAIEVISPASSPAPPQEKLQ
0.189222	217080000	0.185137		PRPF4B	Serine/threonine-protein kinase PRP4 homolog	F5H2U2;Q13523;H0YDJ3	F5H2U2	S	413;427;7	ILSRRERsKDAsPIN	RDDILSRRERSKDASPINRWS
0.189193	173720000	0.185206		CSTF3	Cleavage stimulation factor subunit 3	H0YE74;F5H0G6;Q12996	H0YE74	S	65;624;691	VKRPNEDsDEDEEKG	TKAVKRPNEDSDEDEEKGAVV
0.188988	15303000	0.185684		GAPVD1	GTPase-activating protein and VPS9 domain-containing protein 1	Q14C86-2;Q14C86-6;Q14C86-3;Q14C86-5;Q14C86;H0Y7I9;C9IZ08;Q14C86-4;F8W9S7;H0Y4E7	Q14C86-2;Q14C86-4	S	758;758;758;758;758;621;758;737;737;595	TDVREVssRPstPGL	SDDTDVREVSSRPSTPGLSVV
0.188988	15303000	0.185684		GAPVD1	GTPase-activating protein and VPS9 domain-containing protein 1	Q14C86-2;Q14C86-6;Q14C86-3;Q14C86-5;Q14C86;H0Y7I9;C9IZ08;Q14C86-4;F8W9S7;H0Y4E7	Q14C86-2;Q14C86-4	T	762;762;762;762;762;625;762;741;741;599	EVssRPstPGLsVVs	DVREVSSRPSTPGLSVVSGIS
0.188956	13501000	0.185758		RBM14	RNA-binding protein 14	Q96PK6	Q96PK6	S	604		KAVAMSKRYGSDRRLAELSDY
0.188593	5672600	0.186609		CDK12	Cyclin-dependent kinase 12	Q9NYV4-2;Q9NYV4;Q9NYV4-3	Q9NYV4-2;Q9NYV4-3	S	265;265;265	NYDsYKKsPGSTSRR	TSSNYDSYKKSPGSTSRRQSV
0.188392	22107000	0.187082		RCOR3	REST corepressor 3	B4DV59;Q9P2K3-2;Q9P2K3-4;Q9P2K3;Q9P2K3-3	B4DV59	S	246;214;214;156;214	NRHNQGDsDDDVEEt	KLANRHNQGDSDDDVEETHPM
0.188159	5726900	0.187629		CEP170	Centrosomal protein of 170 kDa	H0Y2V6;Q5SW79-3;Q5SW79;Q5SW79-2	H0Y2V6	S	892;830;928;830	PsyNRDNsIsPEsDV	PDTPSYNRDNSISPESDVDTA
0.188159	19704000	0.187629		CEP170	Centrosomal protein of 170 kDa	H0Y2V6;Q5SW79-3;Q5SW79;Q5SW79-2	H0Y2V6	S	894;832;930;832	yNRDNsIsPEsDVDt	TPSYNRDNSISPESDVDTAST
0.188159	19704000	0.187629		CEP170	Centrosomal protein of 170 kDa	H0Y2V6;Q5SW79-3;Q5SW79;Q5SW79-2	H0Y2V6	S	897;835;933;835	DNsIsPEsDVDtAsT	YNRDNSISPESDVDTASTISL
0.187829	12988000	0.188408		BRSK2;BRSK1	Serine/threonine-protein kinase BRSK2;Serine/threonine-protein kinase BRSK1	B4DM60;B4DLY3;E9PLM7;Q8IWQ3-3;Q8IWQ3-2;Q8IWQ3-4;Q8IWQ3;Q8IWQ3-5;H0YES6;F5H6B9;Q8TDC3;Q8TDC3-2	B4DM60	S	184;255;429;489;489;511;489;535;28;258;563;579	IKNSFLGsPRFHRRK	LNSIKNSFLGSPRFHRRKLQV
0.187816	17517000	0.18844		NDRG3	Protein NDRG3	B7Z341;F8WBF9;Q5TH30;Q9UGV2-3;Q9UGV2-2;Q9UGV2	B7Z341	S	229;238;346;244;321;333	RsRtHstsssLGsGE	RLARSRTHSTSSSLGSGESPF
0.187712	386090000	0.188685		SCAF1	Splicing factor, arginine/serine-rich 19	Q9H7N4	Q9H7N4	S	724	GPsPAPAssPKREVL	DPRGPSPAPASSPKREVLYDS
0.187656	1243400	0.188816		NRF1	Nuclear respiratory factor 1	B4DDV6;Q16656-2;Q16656;Q96AN2	B4DDV6	S	326;421;487;506		MAPVTTRISDSAVTMDGQAVE
0.187634	53476000	0.188868		PIP4K2C	Phosphatidylinositol 5-phosphate 4-kinase type-2 gamma	Q8TBX8-2;Q8TBX8-3;Q8TBX8;H0YIJ6	Q8TBX8-2	S	276;306;324;132	GPPALVGsYGTsPEG	SLTGPPALVGSYGTSPEGIGG
0.187625	16576000	0.188891		ZRSR2	U2 small nuclear ribonucleoprotein auxiliary factor 35 kDa subunit-related protein 2	Q15696	Q15696	S	349	ANRDIYLsPDRTGSS	FWEANRDIYLSPDRTGSSFGK
0.187619	1914200	0.188904		CKB	Creatine kinase B-type	P12277;E7EUJ8;G3V4N7	P12277	S	164;129;164	LAVEALSsLDGDLAG	IEKLAVEALSSLDGDLAGRYY
0.187263	27434000	0.189748		TRIP12	E3 ubiquitin-protein ligase TRIP12	Q14669;Q14CA3;Q14CF1	Q14669	S	1427;1475;1157	QtAPtktsPRNAKKH	GRAQTAPTKTSPRNAKKHDEL
0.187263	27434000	0.189748		TRIP12	E3 ubiquitin-protein ligase TRIP12	Q14669;Q14CA3;Q14CF1	Q14669	T	1421;1469;1151	GKRGRAQtAPtktsP	CVGGKRGRAQTAPTKTSPRNA
0.187087	73010000	0.190167		ZC3H13	Zinc finger CCCH domain-containing protein 13	Q5T200-2;Q5T200;C9J4N9	Q5T200-2	S	198;198;14	IIIKKEVsPEVVRsK	REEIIIKKEVSPEVVRSKLSP
0.187053	18044000	0.190249		SRSF12	Serine/arginine-rich splicing factor 12	Q8WXF0	Q8WXF0	S	105	SKERHPCsPsDHRRS	QMKSKERHPCSPSDHRRSRSP
0.187008	25219000	0.190356		THRAP3	Thyroid hormone receptor-associated protein 3	Q9Y2W1	Q9Y2W1	S	672	EAAKNKKsPEIHRRI	TEQEAAKNKKSPEIHRRIDIS
0.186813	9094800	0.190819		GGNBP2	Gametogenetin-binding protein 2	Q9H3C7;Q9H3C7-3	Q9H3C7	S	360;360	EQLCEEFsEEERVRE	SRLEQLCEEFSEEERVRELKQ
0.186637	1674900	0.191241		PRRC2A	Protein PRRC2A	P48634;F8W1J3;F8VVQ5;F8VVM9;A6NG23;C9JTM3;C9JB33;C9J9U2;C9J6L0;C9J1F6;C9JXZ3;C9JTL3;C9JI93;C9JI26;C9JD87;P48634-2;P48634-3	P48634	S	1306;531;531;531;531;1289;1289;1289;1289;1289;1300;1300;1300;1300;1300;1293;1305	PRRAAAKsPDLsNQN	APAPRRAAAKSPDLSNQNSDQ
0.186637	1674900	0.191241		PRRC2A	Protein PRRC2A	P48634;F8W1J3;F8VVQ5;F8VVM9;A6NG23;C9JTM3;C9JB33;C9J9U2;C9J6L0;C9J1F6;C9JXZ3;C9JTL3;C9JI93;C9JI26;C9JD87;P48634-2;P48634-3	P48634	S	1325;550;550;550;550;1308;1308;1308;1308;1308;1319;1319;1319;1319;1319;1312;1324	NEEWEtAsESsDFTS	DQANEEWETASESSDFTSERR
0.186637	1674900	0.191241		PRRC2A	Protein PRRC2A	P48634;F8W1J3;F8VVQ5;F8VVM9;A6NG23;C9JTM3;C9JB33;C9J9U2;C9J6L0;C9J1F6;C9JXZ3;C9JTL3;C9JI93;C9JI26;C9JD87;P48634-2;P48634-3	P48634	T	1323;548;548;548;548;1306;1306;1306;1306;1306;1317;1317;1317;1317;1317;1310;1322	QANEEWEtAsESsDF	NSDQANEEWETASESSDFTSE
0.186498	102850000	0.191574		PHRF1	PHD and RING finger domain-containing protein 1	E9PJ24;Q9P1Y6-2;Q9P1Y6;F8WEF5;Q9P1Y6-3	E9PJ24	S	1198;1202;1202;1200;1201	KGAVREAsPAPLAQG	PERKGAVREASPAPLAQGEPG
0.186471	1341800000	0.191637		RNPS1	RNA-binding protein with serine-rich domain 1	H3BUL0;H3BMM9;H3BTC0;Q15287;H3BMS0;Q15287-3;Q15287-2;H3BV80	H3BUL0	S	157;157;157;157;134;120;134;63	ERKRRsPsPKPtKVH	DEKERKRRSPSPKPTKVHIGR
0.18637	761770000	0.191879		NASP	Nuclear autoantigenic sperm protein	B4DS57;F5H3J2;P49321;P49321-3;H0YF33;Q5T624;P49321-2;E9PRH9;E9PI86	B4DS57	S	403;439;503;505;28;137;164;100;164	DsVLENKsLQENEEE	MPNDSVLENKSLQENEEEEIG
0.186114	211810000	0.192492		ACIN1	Apoptotic chromatin condensation inducer in the nucleus	Q9UKV3-5;E7EQT4;Q9UKV3	Q9UKV3-5	S	384;344;384	sQGLKEKsKsPsPPR	IKSSQGLKEKSKSPSPPRLTE
0.186114	767920000	0.192492		ACIN1	Apoptotic chromatin condensation inducer in the nucleus	Q9UKV3-5;E7EQT4;Q9UKV3	Q9UKV3-5	S	386;346;386	GLKEKsKsPsPPRLt	SSQGLKEKSKSPSPPRLTEDR
0.186114	767920000	0.192492		ACIN1	Apoptotic chromatin condensation inducer in the nucleus	Q9UKV3-5;E7EQT4;Q9UKV3	Q9UKV3-5	S	388;348;388	KEKsKsPsPPRLtED	QGLKEKSKSPSPPRLTEDRKK
0.186007	6640900	0.192749		ID4	DNA-binding protein inhibitor ID-4	P47928	P47928	S	5	___MKAVsPVRPSGR	______MKAVSPVRPSGRKAP
0.18585	282500000	0.193127		PRPF4B	Serine/threonine-protein kinase PRP4 homolog	F5H2U2;Q13523;H0YDJ3	F5H2U2	S	417;431;11	RERsKDAsPINRWsP	LSRRERSKDASPINRWSPTRR
0.185786	8825200	0.193281		VRK3	Inactive serine/threonine-protein kinase VRK3	E7EMG6;Q8IV63-2;Q8IV63;Q8IV63-3	E7EMG6	S	136;136;136;86	sPQKTRQsPQTLKRS	TSCSPQKTRQSPQTLKRSRVT
0.185763	6423200	0.193336		RREB1	Ras-responsive element-binding protein 1	Q92766;Q92766-2;Q92766-3	Q92766	S	1020;1020;1020		GPVQLAVPIYSSALVSSPPLV
0.185763	6423200	0.193336		RREB1	Ras-responsive element-binding protein 1	Q92766;Q92766-2;Q92766-3	Q92766	S	1021;1021;1021		PVQLAVPIYSSALVSSPPLVG
0.185763	6423200	0.193336		RREB1	Ras-responsive element-binding protein 1	Q92766;Q92766-2;Q92766-3	Q92766	S	1025;1025;1025		AVPIYSSALVSSPPLVGSSAL
0.185706	27716000	0.193474		CDC42EP1	Cdc42 effector protein 1	Q00587-2;Q00587	Q00587-2	S	192;192	PGLRRsDsLLsFRLD	PSEPGLRRSDSLLSFRLDLDL
0.185706	22011000	0.193474		CDC42EP1	Cdc42 effector protein 1	Q00587-2;Q00587	Q00587-2	S	195;195	RRsDsLLsFRLDLDL	PGLRRSDSLLSFRLDLDLGPS
0.185594	157050000	0.193745		EML4	Echinoderm microtubule-associated protein-like 4	B5MBZ0;Q9HC35	B5MBZ0	S	146;146	PQIRAsPsPQPssQP	DQSPQIRASPSPQPSSQPLQI
0.185505	119400000	0.193959		MATR3	Matrin-3	D6REM6;A8MXP9;P43243;B3KM87;P43243-2	D6REM6	S	596;596;596;258;308	KDKSRKRsysPDGkE	LLKKDKSRKRSYSPDGKESPS
0.185505	3068700000	0.193959		MATR3	Matrin-3	D6REM6;A8MXP9;P43243;B3KM87;P43243-2	D6REM6	S	598;598;598;260;310	KSRKRsysPDGkEsP	KKDKSRKRSYSPDGKESPSDK
0.185505	353910000	0.193959		MATR3	Matrin-3	D6REM6;A8MXP9;P43243;B3KM87;P43243-2	D6REM6	S	604;604;604;266;316	ysPDGkEsPsDkKsk	KRSYSPDGKESPSDKKSKTDG
0.185375	62285000	0.194273		YLPM1	YLP motif-containing protein 1	P49750-3;P49750;P49750-4;F8VU51	P49750-3	S	145;145;145;145		PPGLVPMELESPPESPPVPPG
0.185375	52260000	0.194273		YLPM1	YLP motif-containing protein 1	P49750-3;P49750;P49750-4;F8VU51	P49750-3	S	149;149;149;149		VPMELESPPESPPVPPGSYMP
0.185369	72264000	0.194287		UBR5	E3 ubiquitin-protein ligase UBR5	E7EMW7;O95071	E7EMW7	S	1984;1990	LGIDNEDsEHENDDD	LLELGIDNEDSEHENDDDTNQ
0.185142	4126300	0.194838		SLFN14	Schlafen family member 14	P0C7P3-2;P0C7P3	P0C7P3-2	S	864;880		GLERTVVFGLSPECDQSEEFH
0.185142	4126300	0.194838		SLFN14	Schlafen family member 14	P0C7P3-2;P0C7P3	P0C7P3-2	S	870;886		VFGLSPECDQSEEFHKLCFAS
0.184857	4976900	0.195527		CDK12	Cyclin-dependent kinase 12	Q9NYV4-3	Q9NYV4-3	S	343	FLsKRsLsRsPLPRK	SSPFLSKRSLSRSPLPRKSMK
0.184857	4976900	0.195527		CDK12	Cyclin-dependent kinase 12	Q9NYV4-3	Q9NYV4-3	S	345	sKRsLsRsPLPRKSM	PFLSKRSLSRSPLPRKSMKSR
0.184855	22736000	0.195532		LUC7L2;C7orf55	Putative RNA-binding protein Luc7-like 2;UPF0562 protein C7orf55	B7Z500;Q9Y383-2;Q9Y383;B7Z4Q3	B7Z500	S	344;346;347;413	FRDQDLAsCDRDRss	KERFRDQDLASCDRDRSSRDR
0.184852	2968400000	0.195541		SRRM2	Serine/arginine repetitive matrix protein 2	I3L4D8;I3L182;Q9UQ39;Q9UQ35;Q9UQ35-2;I3L2L6	I3L4D8;Q9UQ35	S	484;388;449;484;484;484	PsRRMGRsRsPAtAK	SHTPSRRMGRSRSPATAKRGR
0.184482	3303300	0.196441		CHD8	Chromodomain-helicase-DNA-binding protein 8	H7BXG5;Q9HCK8-2;Q9HCK8	H7BXG5	S	1399;1400;1679	HRVLDNFsDIVEGVD	AAEHRVLDNFSDIVEGVDFDK
0.184276	4199000	0.196944		IKBKAP	Elongator complex protein 1	H0YDF3;F5H2T0;O95163	H0YDF3	S	221;825;1174	SETSsVVsGSEMSGK	DLFSETSSVVSGSEMSGKYSH
0.184004	55339000	0.197608		SRRM2	Serine/arginine repetitive matrix protein 2	Q9UQ35;Q9UQ35-2;I3L2L6;F5GWZ7	Q9UQ35	T	1434;1434;1434;686	MKDGLPRtPsRRsRs	SPEMKDGLPRTPSRRSRSGSS
0.183967	108230000	0.197699		ZC3H4	Zinc finger CCCH domain-containing protein 4	Q9UPT8	Q9UPT8	S	92	EKGEKHHsDsDEEKS	SRKEKGEKHHSDSDEEKSHRR
0.183967	108230000	0.197699		ZC3H4	Zinc finger CCCH domain-containing protein 4	Q9UPT8	Q9UPT8	S	94	GEKHHsDsDEEKSHR	KEKGEKHHSDSDEEKSHRRLK
0.183897	37072000	0.19787		PSIP1	PC4 and SFRS1-interacting protein	O75475;O75475-2	O75475	T	272;272	AKtGVtstsDsEEEG	KNLAKTGVTSTSDSEEEGDDQ
0.18375	24214000	0.19823		IWS1	Protein IWS1 homolog	Q96ST2;E7EX51;B4DJ84;B8ZZB6	Q96ST2	S	235;188;242;240	EPPRHQAsDsENEEP;EPPRHQAsDsENEEL;DPPRHQAsDsENEEL	ESEEPPRHQASDSENEELPKP
0.18375	24214000	0.19823		IWS1	Protein IWS1 homolog	Q96ST2;E7EX51;B4DJ84;B8ZZB6	Q96ST2	S	237;190;244;242	PRHQAsDsENEELPK	EEPPRHQASDSENEELPKPRI
0.183619	23897000	0.198553		SEC62	Translocation protein SEC62	Q99442	Q99442	S	117	kDKGkAEsGkEEDkK	KKEKDKGKAESGKEEDKKSKK
0.183408	821810	0.199071		FOXK2	Forkhead box protein K2	Q01167-2;Q01167;F5H5V5	Q01167-2	T	389;389;385	AHssGAQtPEsLsRE	VLSAHSSGAQTPESLSREGSP
0.1833	906840000	0.199336		NPM1	Nucleophosmin	P06748;P06748-3	P06748;P06748-3	T	219;219	kDskPsstPRskGQE	QNGKDSKPSSTPRSKGQESFK
0.183041	76047000	0.199976		AKAP17A	A-kinase anchor protein 17A	Q02040	Q02040	S	633	KHAYKDDsPRRRsts	PHKKHAYKDDSPRRRSTSPDH
0.182756	13833000	0.200678		WRNIP1	ATPase WRNIP1	B3KT25;Q96S55-2;Q96S55	B3KT25	T	85;85;85	sALkQPAtPtAAEss	SESSALKQPATPTAAESSEGE
0.182478	5050000	0.201369		AMFR	E3 ubiquitin-protein ligase AMFR	Q9UKV5	Q9UKV5	S	542	ERVPLDLsPRLEEtL	AQTERVPLDLSPRLEETLDFG
0.182205	8908000	0.202046		HDGFRP2	Hepatoma-derived growth factor-related protein 2	Q7Z4V5-2;Q7Z4V5;I3L080	Q7Z4V5-2	S	490;490;490	KFALkVDsPDVkRCL	SEIKFALKVDSPDVKRCLNAL
0.182058	38916000	0.202412		ERCC5	DNA repair protein complementing XP-G cells	F8WDY3;I3L0G8;P28715	F8WDY3	S	394;987;562	KFDssLLssDDEtKC	YESKFDSSLLSSDDETKCKPN
0.182058	42424000	0.202412		ERCC5	DNA repair protein complementing XP-G cells	F8WDY3;I3L0G8;P28715	F8WDY3	S	395;988;563	FDssLLssDDEtKCK	ESKFDSSLLSSDDETKCKPNS
0.182041	3389400	0.202454		AHNAK	Neuroblast differentiation-associated protein AHNAK	Q09666	Q09666	S	177	AkDIDIssPEFkIkI	REGAKDIDISSPEFKIKIPRH
0.182009	9501400	0.202535		POLR3G	DNA-directed RNA polymerase III subunit RPC7	O15318	O15318	S	214		FEDGDDFGADSDDNMDEATY_
0.181976	581470000	0.202616		TRA2B	Transformer-2 protein homolog beta	P62995	P62995	S	22		RESRSASRSGSAHGSGKSARH
0.181976	34361000	0.202616		TRA2B	Transformer-2 protein homolog beta	P62995	P62995	S	26	RSGSAHGsGKsARHt	SASRSGSAHGSGKSARHTPAR
0.181976	29257000	0.202616		TRA2B	Transformer-2 protein homolog beta	P62995	P62995	S	29	SAHGsGKsARHtPAR	RSGSAHGSGKSARHTPARSRS
0.181976	29257000	0.202616		TRA2B	Transformer-2 protein homolog beta	P62995	P62995	T	33	sGKsARHtPARsRsK	AHGSGKSARHTPARSRSKEDS
0.181849	149580000	0.202935		STAG2	Cohesin subunit SA-2	F8WAK8;Q8N3U4;Q8N3U4-2	F8WAK8	S	774;843;843	EQDDDNNsADGQQED	VFIEQDDDNNSADGQQEDEAS
0.181539	36424000	0.203709		CHAMP1	Chromosome alignment-maintaining phosphoprotein 1	Q96JM3	Q96JM3	S	476	QKssRGGsPDLWKSs	PESQKSSRGGSPDLWKSSFFI
0.181162	1160300000	0.204654		PPIG	Peptidyl-prolyl cis-trans isomerase G	E9PG73;Q13427	E9PG73	S	730;745	KKFDHEssPGtDEDK	EKNKKFDHESSPGTDEDKSG_
0.180727	4194500	0.205747		HNRNPA1	Heterogeneous nuclear ribonucleoprotein A1;Heterogeneous nuclear ribonucleoprotein A1, N-terminally processed	F8W6I7;P09651-2;P09651;F8VRQ1;F8VXY0;P09651-3;H0YH80	F8W6I7	S	313;313;365;300;297;260;184	GGssssssyGsGrrF	GGYGGSSSSSSYGSGRRF___
0.180709	1280700	0.205793		NCAPH	Condensin complex subunit 2	C9J470;E9PHA2;Q15003;C9JZP1	C9J470	T	68;68;79;79	VFDLQFstDsPRLLA	RSRVFDLQFSTDSPRLLASPS
0.180681	37370000	0.205863		RRP1B	Ribosomal RNA processing protein 1 homolog B	Q14684-2;Q14684	Q14684-2	S	374;392	FCVEEEDsEssLQKR	SRVFCVEEEDSESSLQKRRRK
0.180509	2459800	0.206298		NUMA1	Nuclear mitotic apparatus protein 1	Q14980-2;Q14980;Q9BTE9;H0YFY6;F5H2L0	Q14980-2	S	1775;1789;653;638;762	sQAPLEssLDsLGDV	PARSQAPLESSLDSLGDVFLD
0.180509	2459800	0.206298		NUMA1	Nuclear mitotic apparatus protein 1	Q14980-2;Q14980;Q9BTE9;H0YFY6;F5H2L0	Q14980-2	S	1778;1792;656;641;765	PLEssLDsLGDVFLD	SQAPLESSLDSLGDVFLDSGR
0.180299	19556000	0.206829		PARN	Poly(A)-specific ribonuclease PARN	B4DSB0;O95453-2;O95453-3;O95453	B4DSB0	S	444;558;573;619	KRMKKELsPAGsIsK	KKLKRMKKELSPAGSISKNSP
0.180299	6260200	0.206829		PARN	Poly(A)-specific ribonuclease PARN	B4DSB0;O95453-2;O95453-3;O95453	B4DSB0	S	448;562;577;623	KELsPAGsIsKNsPA	RMKKELSPAGSISKNSPATLF
0.180258	280100000	0.206933		TFIP11	Tuftelin-interacting protein 11	Q9UBB9	Q9UBB9	S	210	QDFPVVDsEEEAEEE	QSMQDFPVVDSEEEAEEEFQK
0.180171	33851000	0.207152		RBM34	RNA-binding protein 34	H7C5M1;Q5TCT4;A2A2V2;P42696-2;P42696	H7C5M1	S	17;14;12;14;14	SKRKRKRsVQEGENP	EGMSKRKRKRSVQEGENPDDG
0.180124	17784000	0.207271		UBXN7	UBX domain-containing protein 7	C9JAT7;F5GYB1;O94888	C9JAT7	S	118;132;280	KKCARsEsLIDAsED	SPPKKCARSESLIDASEDSQL
0.180085	20804000	0.20737		GPATCH4	G patch domain-containing protein 4	F8W895;E9PAV9;Q5T3I0;Q5T3I0-3	F8W895	S	99;133;128;133	KPNKDLEsCsDDDNQ	GGEKPNKDLESCSDDDNQGSK
0.180085	52103000	0.20737		GPATCH4	G patch domain-containing protein 4	F8W895;E9PAV9;Q5T3I0;Q5T3I0-3	F8W895	S	101;135;130;135	NKDLEsCsDDDNQGs	EKPNKDLESCSDDDNQGSKSP
0.180085	20804000	0.20737		GPATCH4	G patch domain-containing protein 4	F8W895;E9PAV9;Q5T3I0;Q5T3I0-3	F8W895	S	108;142;137;142	sDDDNQGsKsPKILt	ESCSDDDNQGSKSPKILTDEM
0.179975	18392000	0.20765		NTHL1	Endonuclease III-like protein 1	P78549;H3BRL9;H3BPD5	P78549	S	73;39;53	VAyEGsDsEKGEGAE	RLRVAYEGSDSEKGEGAEPLK
0.179293	2692900	0.209386		EIF2AK2	Interferon-induced, double-stranded RNA-activated protein kinase	E9PC80;P19525;F8WBH4;C9JZT2;Q05CP4	E9PC80	T	90;90;90;90;90	sPLLLtttNssEGLS	KAVSPLLLTTTNSSEGLSMGN
0.179191	609110000	0.209646		TP53	Cellular tumor antigen p53	P04637;P04637-4;P04637-7;P04637-2;P04637-3;P04637-5;P04637-6;E7ESS1;P04637-8;P04637-9	P04637	S	315;276;183;315;315;276;276;183;183;183	LPNNtsssPQPkkkP	KRALPNNTSSSPQPKKKPLDG
0.179033	26857000	0.21005		UHMK1	Serine/threonine-protein kinase Kist	Q8TAS1;Q8TAS1-2	Q8TAS1	S	27;27		EAFGRLWQVQSRLGSGSSASV
0.178815	8983000	0.210608		SUPT6H	Transcription elongation factor SPT6	Q7KZ85;Q7KZ85-3;Q7KZ85-2	Q7KZ85	S	1712;712;531		PSPMIESTPMSIAGDATPLLD
0.178815	19566000	0.210608		SUPT6H	Transcription elongation factor SPT6	Q7KZ85;Q7KZ85-3;Q7KZ85-2	Q7KZ85	T	1718;718;537	MSIAGDAtPLLDEMD	STPMSIAGDATPLLDEMDR__
0.178759	46748000	0.210752		PRPF4B	Serine/threonine-protein kinase PRP4 homolog	F5H2U2;Q13523;H0YDJ3	F5H2U2	S	423;437;17	AsPINRWsPtRRRsR	SKDASPINRWSPTRRRSRSPI
0.178732	7779900	0.210821		SCAF11	Protein SCAF11	F8W028;F8VXG7;Q99590-2;Q99590	F8W028	S	473;341;218;533	QDQIsGLsQsEVKTD	LEKQDQISGLSQSEVKTDVCT
0.178476	1647000	0.211477		TUT1	Speckle targeted PIP5K1A-regulated poly(A) polymerase	H3BRB1;F5H0R1;Q9H6E5	H3BRB1	S	301;339;301		DSALASETLASPQSLPPASPL
0.178476	1647000	0.211477		TUT1	Speckle targeted PIP5K1A-regulated poly(A) polymerase	H3BRB1;F5H0R1;Q9H6E5	H3BRB1	S	304;342;304		LASETLASPQSLPPASPLLED
0.178476	1647000	0.211477		TUT1	Speckle targeted PIP5K1A-regulated poly(A) polymerase	H3BRB1;F5H0R1;Q9H6E5	H3BRB1	S	309;347;309	PQSLPPAsPLLEDRE	LASPQSLPPASPLLEDREEGD
0.178203	92493000	0.212182		TOP2A	DNA topoisomerase 2-alpha	C9J5P2;P11388;P11388-2;P11388-3;P11388-4;H7BXX8;H7BXH5	C9J5P2	S	1414;1377;1403;1413;1458;1400;1457	KPQKsVVsDLEADDV	KELKPQKSVVSDLEADDVKGS
0.178111	5830900	0.212418		PCBP1	Poly(rC)-binding protein 1	Q15365	Q15365	S	263	GFAGIdsssPEVKGy	GGTGFAGIDSSSPEVKGYWAS
0.178042	530140000	0.212595		LARP7	La-related protein 7	Q4G0J3;H0YA82;D6RFF0	Q4G0J3	S	261;42;261	sRPtsEGsDIEstEP	MKRSRPTSEGSDIESTEPQKQ
0.178042	155080000	0.212595		LARP7	La-related protein 7	Q4G0J3;H0YA82;D6RFF0	Q4G0J3	T	257;38;257	KMKRsRPtsEGsDIE	SISKMKRSRPTSEGSDIESTE
0.177992	90625000	0.212726		CDK7	Cyclin-dependent kinase 7	D6REC6;D6R9G1;D6RAD4;P50613	D6REC6	T	77;77;133;170	GsPNRAytHQVVtRW	KSFGSPNRAYTHQVVTRWYRA
0.177811	4075400	0.213194		CSNK1G3	Casein kinase I isoform gamma-3	H0YBN6;E7EVD0;B4DSH2;Q9Y6M4-3;A8K040;Q9Y6M4;Q9Y6M4-2	H0YBN6	S	93;232;269;344;345;344;344	VQQDPALssNREAHQ	VGAVQQDPALSSNREAHQHRD
0.177574	58444000	0.213806		CTPS1	CTP synthase 1	B4DR64;P17812	B4DR64	S	347;578	sGsssPDsEItELKF	SDRSGSSSPDSEITELKFPSI
0.177433	3940100000	0.214172		EEF1D	Elongation factor 1-delta	E9PL71;F8W934;P29692-3;E9PQ49;E9PI39;E9PK01;E9PRY8;P29692;P29692-2;E9PQZ1;E9PBQ9;E9PPR1;E9PL12;E9PK06	E9PL71	S	109;427;109;133;133;133;549;133;499;90;114;133;133;114	APQtQHVsPMRQVEP;APQTQHVsPMRQVEP	RATAPQTQHVSPMRQVEPPAK
0.177433	4978300	0.214172		EEF1D	Elongation factor 1-delta	E9PL71;F8W934;P29692-3;E9PQ49;E9PI39;E9PK01;E9PRY8;P29692;P29692-2;E9PQZ1;E9PBQ9;E9PPR1;E9PL12;E9PK06	E9PL71	S	95;413;95;119;119;119;535;119;485;76;100;119;119;100	LNVLEkssPGHRAtA	EARLNVLEKSSPGHRATAPQT
0.177396	31912000	0.214269		MTMR3	Myotubularin-related protein 3	G5E953;Q13615-3;Q13615-2;Q13615	G5E953	S	497;633;633;633	PLASRRCsDPsLNEK	NTVPLASRRCSDPSLNEKWQE
0.177379	10151000	0.214313		2006-09-01	Septin-6	B4E049;B1AMS2;F5H1J5;Q14141-2;Q14141-4;Q14141	B4E049	T	360;418;448;418;418;418	sQAGGsQtLkRDKEK	SQGSQAGGSQTLKRDKEKKK_
0.177163	5854200	0.214873		HNRNPH1;HNRNPH2	Heterogeneous nuclear ribonucleoprotein H;Heterogeneous nuclear ribonucleoprotein H, N-terminally processed;Heterogeneous nuclear ribonucleoprotein H2	E9PCY7;P31943;F5GZT4;H0YBG7;G8JLB6;H0YBK1;P55795;B4DFK9;H0YBW2	E9PCY7	S	397;417;127;153;417;85;417;372;37		SYGGPASQQLSGGYGGGYGGQ
0.177083	3468000	0.215082		MAP7D1	MAP7 domain-containing protein 1	Q3KQU3-4;Q3KQU3;Q3KQU3-2	Q3KQU3-4	S	378;410;373	VRRRPEAsPVQkkEK	PAPVRRRPEASPVQKKEKKDK
0.17694	6355900	0.215454		TMEM87B	Transmembrane protein 87B	Q96K49-2;Q96K49	Q96K49-2	S	468;469	FMPLIDDsDDEIEEF	RYAFMPLIDDSDDEIEEFMVT
0.176742	382490000	0.215972		SRRM2	Serine/arginine repetitive matrix protein 2	Q9UQ35;F5GWZ7;I3L3Q8	Q9UQ35	S	2426;1678;29	MTsERAPsPssRMGQ	QSRMTSERAPSPSSRMGQAPS
0.176695	4131700	0.216094		PKNOX1	Homeobox protein PKNOX1	H0YLD9;E7EPN6;P55347	H0YLD9	S	158;315;432		AHISGLVLENSDSLQ______
0.176695	25044000	0.216094		PKNOX1	Homeobox protein PKNOX1	H0YLD9;E7EPN6;P55347	H0YLD9	S	160;317;434		ISGLVLENSDSLQ________
0.17661	49640000	0.216315		SURF6	Surfeit locus protein 6	O75683	O75683	S	138	QGsAKELsPAALEkR	ARGQGSAKELSPAALEKRRRR
0.176563	25586000	0.216438		PPIL1	Peptidyl-prolyl cis-trans isomerase-like 1	Q9Y3C6	Q9Y3C6	S	149	VGMVEtNsQDRPVDD	VNRVGMVETNSQDRPVDDVKI
0.176478	23287000	0.21666		BRIP1	Fanconi anemia group J protein	Q9BX63	Q9BX63	S	1032	SSENSAssPPRFKTE	ELGSSENSASSPPRFKTEKME
0.17647	98927000	0.216682		RBM14	RNA-binding protein 14	Q96PK6	Q96PK6	S	291	PyRGQLAsPSSQSAA	LGAPYRGQLASPSSQSAAASS
0.176457	25750000	0.216714		BRAT1	BRCA1-associated ATM activator 1	Q6PJG6-3;Q6PJG6	Q6PJG6-3	S	212;742	SLREARGsPNtASAE	SYSSLREARGSPNTASAEATL
0.176424	16790000	0.216803		AMPD2	AMP deaminase 2	H0Y360;Q01433-3;E9PNG0;Q01433-2;Q01433-4;Q01433;E9PIJ1;H0YCL9	H0Y360	S	161;71;72;109;115;190;72;157	QDFLKtDsDsDLQLy	RAKQDFLKTDSDSDLQLYKEQ
0.175998	21820000	0.21792		ATF7IP	Activating transcription factor 7-interacting protein 1	Q6VMQ6-2;G3V1U0;Q6VMQ6;F5GX74	Q6VMQ6-2	S	556;556;557;565	EFSRRKRsKsEDMDN	EKNEFSRRKRSKSEDMDNVQS
0.175998	21820000	0.21792		ATF7IP	Activating transcription factor 7-interacting protein 1	Q6VMQ6-2;G3V1U0;Q6VMQ6;F5GX74	Q6VMQ6-2	S	558;558;559;567	SRRKRsKsEDMDNVQ	NEFSRRKRSKSEDMDNVQSKR
0.175954	30139000	0.218035		DAXX	Death domain-associated protein 6	F5H082;Q9UER7;Q9UER7-2	F5H082	S	489;564;564	LEEESPVsQLFELEI	ELTLEEESPVSQLFELEIEAL
0.175938	279670000	0.218076		PPIG	Peptidyl-prolyl cis-trans isomerase G	E9PG73;Q13427	E9PG73	S	738;753	PGtDEDKsG______	ESSPGTDEDKSG_________
0.17592	2036700	0.218125		FAM64A	Protein FAM64A	I3L476;I3L1U3;I3L419;I3L156;Q9BSJ6-2;Q9BSJ6	I3L476	T	133;133;133;164;133;133	QKGsGsPtHsLsQKS	RGAQKGSGSPTHSLSQKSTRL
0.175917	106210000	0.218133		CDC20	Cell division cycle protein 20 homolog	Q12834	Q12834	T	70	SSSkVQttPskPGGD	PGKSSSKVQTTPSKPGGDRYI
0.175801	6079100	0.218436		WDR44	WD repeat-containing protein 44	Q5JSH3-2;Q5JSH3;F8W913;H7BY83	Q5JSH3-2	S	126;126;101;26	EESQKAEsQNtFEET	VLPEESQKAESQNTFEETELE
0.175742	1891200	0.218592		TMEM194A	Transmembrane protein 194A	O14524-2;O14524	O14524-2	S	357;430		YEEASSEEEDSYSRCPAITQN
0.175729	34955000	0.218627		SRCAP	Helicase SRCAP	Q6ZRS2-3;Q6ZRS2-2;Q6ZRS2	Q6ZRS2-3	S	2632;2728;2790	ETSAsPGsPSVRSMS	GVSETSASPGSPSVRSMSGPE
0.175671	18641000	0.21878		ROCK1	Rho-associated protein kinase 1	Q13464	Q13464	S	1102	LDLsDstsVAsFPsA	AKLLDLSDSTSVASFPSADET
0.175525	21060000	0.219164		RNF214	RING finger protein 214	E9PRE9;E9PN76;B4DTD1;Q8ND24	E9PRE9	S	15;15;15;15	GVVANAPsPPESSSL	EVAGVVANAPSPPESSSLCAS
0.175493	18727000	0.219248		PHAX	Phosphorylated adapter RNA export protein	Q9H814	Q9H814	S	368	ALAsLDEsQEGHAEA	TNEALASLDESQEGHAEAKLE
0.175327	8794300	0.219686		CDCA8	Borealin	Q53HL2	Q53HL2	T	106	LtAEAIQtPLksAkT	INKLTAEAIQTPLKSAKTRKV
0.175253	5522300	0.219883		CDK12	Cyclin-dependent kinase 12	Q9NYV4-2;Q9NYV4;H0YLT2	Q9NYV4-2	T	1202;1202;99		AEQTTLEASSTPADMQNILAV
0.175047	14408000	0.220428		RBM12B	RNA-binding protein 12B	Q8IXT5;B9ZVT1	Q8IXT5	S	375;375	AryEKKRsGsLERDR	KFIARYEKKRSGSLERDRPGH
0.175047	14408000	0.220428		RBM12B	RNA-binding protein 12B	Q8IXT5;B9ZVT1	Q8IXT5	S	377;377	yEKKRsGsLERDRPG	IARYEKKRSGSLERDRPGHVS
0.174466	6957200	0.221971		VAMP3	Vesicle-associated membrane protein 3	Q15836	Q15836	S	11	GPTAAtGsNRRLQQt	MSTGPTAATGSNRRLQQTQNQ
0.174406	17428000	0.222131		RBL1	Retinoblastoma-like protein 1	P28749;P28749-2;H0YE05	P28749	T	332;332;137	DAEEEIGtPRKFTRD	LGADAEEEIGTPRKFTRDTPL
0.174323	6183400	0.222352		FAM63A	Protein FAM63A	Q8N5J2-2;Q8N5J2-4;Q8N5J2;Q8N5J2-3	Q8N5J2-2	S	299;346;441;489	RMRTRVLsLQGRGAt	QPVRMRTRVLSLQGRGATSGR
0.174265	6656900	0.222507		SNX2	Sorting nexin-2	O60749	O60749	T	104	sPAVtPVtPtTLIAP	SEPSPAVTPVTPTTLIAPRIE
0.174186	277920000	0.222718		SCAF11	Protein SCAF11	F8W028;F8VXG7;Q99590-2;Q99590	F8W028	S	770;638;515;830		RRETGKESRKSQSPSPKNESA
0.174186	277920000	0.222718		SCAF11	Protein SCAF11	F8W028;F8VXG7;Q99590-2;Q99590	F8W028	S	772;640;517;832	kESRKSQsPSPKNES	ETGKESRKSQSPSPKNESARG
0.174186	209150000	0.222718		SCAF11	Protein SCAF11	F8W028;F8VXG7;Q99590-2;Q99590	F8W028	S	774;642;519;834		GKESRKSQSPSPKNESARGRK
0.174047	38398000	0.22309		HOXB6	Homeobox protein Hox-B6	P17509	P17509	S	214	LLsAsQLsAEEEEEK	ESKLLSASQLSAEEEEEKQAE
0.174044	9867500	0.223098		PAPOLA	Poly(A) polymerase alpha	H0YJL4;G3V2A0;G3XAH6;F5H5I8;P51003	H0YJL4	S	38;287;537;553;537	DNSMsVPsPTSAtKt	MDSDNSMSVPSPTSATKTSPL
0.174044	9867500	0.223098		PAPOLA	Poly(A) polymerase alpha	H0YJL4;G3V2A0;G3XAH6;F5H5I8;P51003	H0YJL4	S	46;295;545;561;545	PTSAtKtsPLNSSGS	VPSPTSATKTSPLNSSGSSQG
0.173899	4345000	0.223485		GAB1	GRB2-associated-binding protein 1	Q13480-2;B7Z3B9;Q13480	Q13480-2	S	644;511;614		FGSNSLDGGSSPMIKPKGDKQ
0.173139	121640000	0.225525		ZNF703	Zinc finger protein 703	Q9H7S9	Q9H7S9	S	252	KDQEPKPsPEPAAVS	LDKKDQEPKPSPEPAAVSRGG
0.173082	26327000	0.225677		RRP15	RRP15-like protein	Q9Y3B9	Q9Y3B9	S	278	DsRPEsAsDsDt___	GPDDSRPESASDSDT______
0.173082	19354000	0.225677		RRP15	RRP15-like protein	Q9Y3B9	Q9Y3B9	T	282	EsAsDsDt_______	SRPESASDSDT__________
0.173018	47330000	0.225852		RGPD5;RGPD8;RGPD6;RANBP2;RGPD3;RGPD4;RGPD1;RGPD2	RANBP2-like and GRIP domain-containing protein 5/6;RANBP2-like and GRIP domain-containing protein 8;E3 SUMO-protein ligase RanBP2;RanBP2-like and GRIP domain-containing protein 3;RanBP2-like and GRIP domain-containing protein 4;RANBP2-like and GRIP domain-containing protein 1;RANBP2-like and GRIP domain-containing protein 2	Q99666;O14715;H7BZ48;P49792;E9PGT0;A6NKT7;Q7Z3J3;F8VYC4;P0DJD0;P0DJD1;E7ES93;B4DTM4	Q99666;P49792	S	1478;1478;20;2454;1478;1479;1479;1471;1463;1471;382;382	sLItPHVsRsstPRE	EKDSLITPHVSRSSTPRESPC
0.172995	7807400	0.225913		AAAS	Aladin	F8VZ44;Q9NRG9-2;Q9NRG9	F8VZ44	S	398;489;522	LPLFtETsPtsAPWD	IHDLPLFTETSPTSAPWDPLP
0.172834	109870000	0.226345		PRPF3	U4/U6 small nuclear ribonucleoprotein Prp3	E7EVD1;O43395	E7EVD1	S	570;619	KGDDDEEsDEEAVKK	SNTKGDDDEESDEEAVKKTNK
0.1724	22007000	0.227519		SLTM	SAFB-like transcription modulator	Q9NWH9;H7C3F4;A8K5V8	Q9NWH9	S	590;156;159	sKEKERAsLDKKRDK	HGRSKEKERASLDKKRDKDYR
0.172163	412570000	0.228163		SRSF11	Serine/arginine-rich splicing factor 11	Q5T757;Q05519-2;Q05519;Q5T760	Q5T757	S	306;366;366;373	RsPKRKLsRsPsPRR	KKPRSPKRKLSRSPSPRRHKK
0.172163	412570000	0.228163		SRSF11	Serine/arginine-rich splicing factor 11	Q5T757;Q05519-2;Q05519;Q5T760	Q5T757	S	308;368;368;375	PKRKLsRsPsPRRHK	PRSPKRKLSRSPSPRRHKKEK
0.172163	412570000	0.228163		SRSF11	Serine/arginine-rich splicing factor 11	Q5T757;Q05519-2;Q05519;Q5T760	Q5T757	S	310;370;370;377	RKLsRsPsPRRHKKE	SPKRKLSRSPSPRRHKKEKKK
0.172153	630810	0.22819		ZC3HAV1	Zinc finger CCCH-type antiviral protein 1	F5H1W0;C9J6P4;Q7Z2W4-3;Q7Z2W4-2;Q7Z2W4	F5H1W0	S	138;378;378;378;378	ARRKtVFsPtLPAAR	DQGARRKTVFSPTLPAARSSL
0.171912	253690000	0.228845		SRRM2	Serine/arginine repetitive matrix protein 2	Q9UQ35;F5GWZ7	Q9UQ35	S	2067;1319	RtARGKRsLtRsPPA	RTPRTARGKRSLTRSPPAIRR
0.171912	253690000	0.228845		SRRM2	Serine/arginine repetitive matrix protein 2	Q9UQ35;F5GWZ7	Q9UQ35	S	2071;1323	GKRsLtRsPPAIRRR	TARGKRSLTRSPPAIRRRSAS
0.171881	9036900	0.228931		ELL2	RNA polymerase II elongation factor ELL2	D6RC27;O00472	D6RC27	S	133;315		SPVCSSRDAVSSPQKRLLDSE
0.171881	9036900	0.228931		ELL2	RNA polymerase II elongation factor ELL2	D6RC27;O00472	D6RC27	S	134;316	ssRDAVSsPQKRLLD	PVCSSRDAVSSPQKRLLDSEF
0.171817	6174300	0.229105		DDX39B;hCG_2005638	Spliceosome RNA helicase DDX39B	F8VQ10;Q13838;Q13838-2;F6S4E6;F6UN21;F6TRA5;F6WLT2;F8VZL8;H0Y7G4;Q5STU3;H0Y6N8;H0Y4V8;H0Y6G9;H0Y557;B4DIJ6;H0Y7X6;B4DP52;H0Y800;F6UJC5;E9PP12	F8VQ10	T	187;172;187;172;172;172;172;172;72;172;72;72;72;72;125;72;94;28;94;94	CPHIVVGtPGRILAL	KKNCPHIVVGTPGRILALARN
0.171714	1306500	0.229385		SETD5	SET domain-containing protein 5	E7EWN3;Q9C0A6-2;Q9C0A6-3;Q9C0A6	E7EWN3	S	1288;1158;1171;1269	FRGHPTQsPGYSYRT	SSPFRGHPTQSPGYSYRTTAL
0.171695	33895000	0.229437		LMO7	LIM domain only protein 7	E9PMS6;Q8WWI1-3;F8WD26;Q8WWI1-4;Q8WWI1-2;Q8WWI1;E9PMT2;E9PLH4	E9PMS6	S	1102;1176;1510;1510;1510;1510;1225;1225	GIMRRGEsLDNLDSP;GIMRRGEsLDNLDsP	SLPGIMRRGESLDNLDSPRSN
0.171668	3560500	0.22951		MSH2	DNA mismatch repair protein Msh2	B4DL39;B4DSB9;E9PHA6;B4E2Z2;P43246	B4DL39	S	608;646;860;794;860	EFQYIGEsQGyDIME	ELEEFQYIGESQGYDIMEPAA
0.171607	2689700	0.229676		MPHOSPH8	M-phase phosphoprotein 8	F5H8H9;Q99549;Q99549-2	F5H8H9	S	136;136;136	NDIFEANsDsDQQsE	SLNNDIFEANSDSDQQSETKE
0.171607	2689700	0.229676		MPHOSPH8	M-phase phosphoprotein 8	F5H8H9;Q99549;Q99549-2	F5H8H9	S	138;138;138	IFEANsDsDQQsEtK	NNDIFEANSDSDQQSETKEDT
0.171555	33818000	0.22982		DGCR8	Microprocessor complex subunit DGCR8	Q8WYQ5-3;Q8WYQ5	Q8WYQ5-3	S	377;377	LtPsGDVsPVKPLsR	SSDLTPSGDVSPVKPLSRSAE
0.171306	3702700	0.2305		CNNM2	Metal transporter CNNM2	Q9H8M5-2;Q9H8M5	Q9H8M5-2	S	773;795		SLLQVYIPDYSVRALSDLQFV
0.171265	71557000	0.230612		EML4	Echinoderm microtubule-associated protein-like 4	B5MBZ0;Q9HC35;B5MCW9	B5MBZ0	S	176;176;118	TksIkRPsPAEKSHN	ATPTKSIKRPSPAEKSHNSWE
0.171245	15872000	0.230667		SRGAP2	SLIT-ROBO Rho GTPase-activating protein 2	H0Y4C3;H0Y2P8;O75044	H0Y4C3	T	63;117;203	VKQEDRQtPRsPDsT	GKSVKQEDRQTPRSPDSTANV
0.171129	9428500	0.230982		GIGYF1	PERQ amino acid-rich with GYF domain-containing protein 1	A2VDH9;O75420	A2VDH9	S	357;638	PTMSRsLsVPDSGRL	NLLPTMSRSLSVPDSGRLWDV
0.171098	14366000	0.231069		NOL8	Nucleolar protein 8	A6NJK7;Q76FK4-3;Q76FK4-2;Q76FK4-4;Q76FK4;F8WE42;F5H101;F5GWN9	A6NJK7	S	367;239;297;365;365;365;365;365	NRVsCHDsDDDIMRN	GIKNRVSCHDSDDDIMRNDRE
0.170985	12230000	0.231377		MAP1S	Microtubule-associated protein 1S;MAP1S heavy chain;MAP1S light chain	B4DH53;Q66K74	B4DH53	S	715;741	DVDLCLVsPCEFEHR	SPHDVDLCLVSPCEFEHRKAV
0.170695	132560000	0.232173		ZCCHC8	Zinc finger CCHC domain-containing protein 8	F5H803;F5GXQ6;Q6NZY4-2;Q6NZY4;F5GX80	F5H803	S	38;38;189;427;189	SSHSsPGsPKKQKNE	KRSSSHSSPGSPKKQKNESNS
0.17067	35986000	0.232244		PARVB;PARVA	Beta-parvin;Alpha-parvin	B0QYP6;Q9HBI1;F5H1R9;Q9NVD7-2;Q9NVD7	B0QYP6;F5H1R9	T	28;28;36;36;36	FLGkLGGtLARKRRA;FLGkLGGtLARRKKA	DDSFLGKLGGTLARRKKAKEV
0.170613	49164000	0.232399		MAP1B	Microtubule-associated protein 1B;MAP1B heavy chain;MAP1 light chain LC1	P46821	P46821	S	831	EAERsLMssPEDLtK	KELEAERSLMSSPEDLTKDFE
0.170613	49164000	0.232399		MAP1B	Microtubule-associated protein 1B;MAP1B heavy chain;MAP1 light chain LC1	P46821	P46821	S	832	AERsLMssPEDLtKD	ELEAERSLMSSPEDLTKDFEE
0.170462	15701000	0.232816		EPHA3	Receptor protein-tyrosine kinase;Ephrin type-A receptor 3	C9JXA2;P29320	C9JXA2	S	876;876		NNRPKFEQIVSILDKLIRNPG
0.170402	198900000	0.232982		WDR43	WD repeat-containing protein 43	Q15061;H7C2H8	Q15061	S	590;142	EKTKGATsPGQKAKL	TASEKTKGATSPGQKAKLVYE
0.170325	3305900	0.233192		SIPA1L3	Signal-induced proliferation-associated 1-like protein 3	O60292	O60292	S	1160	PYRQPSGsFSTPGsA	RVPPYRQPSGSFSTPGSATYV
0.170146	15674000	0.233687		BAG3	BAG family molecular chaperone regulator 3	C9JFK9;O95817	C9JFK9	S	78;136	AAPQRsQsPLRGMPE	AAAAAPQRSQSPLRGMPETTQ
0.170136	21397000	0.233713		KANSL2	KAT8 regulatory NSL complex subunit 2	F8VUX5;H0YIQ8;F8VXI8;F8VX10;Q9H9L4	F8VUX5	S	84;140;147;330;147	SRILDEDsWsDGEQE	SEASRILDEDSWSDGEQEPIT
0.170136	21397000	0.233713		KANSL2	KAT8 regulatory NSL complex subunit 2	F8VUX5;H0YIQ8;F8VXI8;F8VX10;Q9H9L4	F8VUX5	S	86;142;149;332;149	ILDEDsWsDGEQEPI	ASRILDEDSWSDGEQEPITVD
0.170079	1554500	0.233871		EFNB2;EFNB1	Ephrin-B2;Ephrin-B1	P52799;P98172	P52799	S	325;338	VQEMPPQsPANIyyk	VYIVQEMPPQSPANIYYKV__
0.170042	6119800	0.233974		DBN1	Drebrin	Q16643;Q16643-2;A8MV58;F8W9Z3;D6R9Q9	Q16643	T	559;561;605;291;291	ESLAAPQtPTLPSAL	VEGESLAAPQTPTLPSALEEL
0.170036	8880200	0.23399		DNTTIP2	Deoxynucleotidyltransferase terminal-interacting protein 2	Q5QJE6;E9PRB3	Q5QJE6	S	97;104		TSEAESNYSVSEHHDTILRVT
0.169993	889950000	0.234108		HDGF	Hepatoma-derived growth factor	A8K8G0;Q5SZ08;P51858;Q5SZ07;B7Z525	A8K8G0	S	100;125;132;148;155	kkGNAEGssDEEGKL	DGDKKGNAEGSSDEEGKLVID
0.169993	889950000	0.234108		HDGF	Hepatoma-derived growth factor	A8K8G0;Q5SZ08;P51858;Q5SZ07;B7Z525	A8K8G0	S	101;126;133;149;156	kGNAEGssDEEGKLV	GDKKGNAEGSSDEEGKLVIDE
0.169727	560220000	0.234845		IGF2BP3	Insulin-like growth factor 2 mRNA-binding protein 3	O00425	O00425	S	184	RGSsRQGsPGsVskQ	LGQRGSSRQGSPGSVSKQKPC
0.169647	22919000	0.235067		PRRC2B	Protein PRRC2B	Q5JSZ5;Q5JSZ5-5;Q5JT00	Q5JSZ5	S	556;556;96	AEKEVPWsPsAEKAs	RKQAEKEVPWSPSAEKASPQE
0.169564	549150	0.235297		DNTTIP2	Deoxynucleotidyltransferase terminal-interacting protein 2	Q5QJE6	Q5QJE6	S	340	QLVsQRHstPQNKNA	SLQQLVSQRHSTPQNKNAVSV
0.169394	413720000	0.235771		SRSF10	Serine/arginine-rich splicing factor 10	O75494-2;O75494;O75494-5;Q5JRI3;O75494-3;Q5JRI1;O75494-4	O75494-2;Q5JRI1	S	131;131;131;131;131;131;131	YERRRsRsRsFDyNy	SRSYERRRSRSRSFDYNYRRS
0.169394	434380000	0.235771		SRSF10	Serine/arginine-rich splicing factor 10	O75494-2;O75494;O75494-5;Q5JRI3;O75494-3;Q5JRI1;O75494-4	O75494-2;Q5JRI1	S	133;133;133;133;133;133;133	RRRsRsRsFDyNyRR	SYERRRSRSRSFDYNYRRSYS
0.16937	20521000	0.235838		FAM84B	Protein FAM84B	Q96KN1	Q96KN1	T	288	GDsNVARttPPPGRP	PEEGDSNVARTTPPPGRPPAP
0.16937	20521000	0.235838		FAM84B	Protein FAM84B	Q96KN1	Q96KN1	T	289	DsNVARttPPPGRPP	EEGDSNVARTTPPPGRPPAPS
0.16926	15824000	0.236144		CENPC	Centromere protein C	H0Y8J2;Q03188;Q6PIR0	H0Y8J2	S	215;308;308	DEFIIDEsDQsFASR	LIEDEFIIDESDQSFASRSWI
0.16926	33830000	0.236144		CENPC	Centromere protein C	H0Y8J2;Q03188;Q6PIR0	H0Y8J2	S	218;311;311	IIDEsDQsFASRsWI	DEFIIDESDQSFASRSWITIP
0.169194	2635200	0.236326		ANAPC1	Anaphase-promoting complex subunit 1	F8WAS1;Q9H1A4	F8WAS1	S	50;50	QPAsELWssDGAAGL	RQLQPASELWSSDGAAGLVGS
0.169194	2635200	0.236326		ANAPC1	Anaphase-promoting complex subunit 1	F8WAS1;Q9H1A4	F8WAS1	S	51;51	PAsELWssDGAAGLV	QLQPASELWSSDGAAGLVGSL
0.169151	7217200	0.236445		TNRC18	Trinucleotide repeat-containing gene 18 protein	H9KVB4;O15417;C9JS29;O15417-2;H7C177	H9KVB4	S	1989;1989;1044;1989;26	FEAGPEAsDDDLWTR	EPGFEAGPEASDDDLWTRRRS
0.168979	24382000	0.236926		ATAD5	ATPase family AAA domain-containing protein 5	Q96QE3;Q96QE3-2	Q96QE3	S	306;306	IVKSGYIsESENsEI	VDEIVKSGYISESENSEISQQ
0.168786	170190000	0.237465		MYH14	Myosin-14	F2Z2U9;F2Z2U8;G8JLL9;Q7Z406-4;Q7Z406;Q7Z406-6;Q7Z406-2	F2Z2U9	S	1753;2002;2010;1753;1969;1977;2010	RLEEGVAsDEEAEEA	QVFRLEEGVASDEEAEEAQPG
0.168715	9350800	0.237664		CAMK2B;CAMK2G	Calcium/calmodulin-dependent protein kinase type II subunit beta;Calcium/calmodulin-dependent protein kinase type II subunit gamma	H7BZC6;B7Z1Z6;H0Y6G2;H7BXS4;Q8WU40;Q5SWX3;Q13554-7;Q13554-4;Q13554-6;Q13555-10;Q13554-3;Q13554-8;Q13554-5;Q13555-3;Q13555-5;Q13555-4;Q13555-7;Q13555-9;Q13554-2;Q13555-2;Q13555-8;Q13555;Q13555-6;Q13554	H7BZC6	T	44;158;66;287;222;287;287;287;287;287;287;287;287;287;287;287;287;287;287;287;287;287;287;287	SMMHRQEtVECLKKF;sMMHRQEtVECLKKF	TVASMMHRQETVECLKKFNAR
0.168487	14982000	0.238302		NASP	Nuclear autoantigenic sperm protein	B4DS57;F5H3J2;P49321;P49321-3	B4DS57	S	380;416;480;482	EGEEtEGsEEDDKEN	QMKEGEETEGSEEDDKENDKT
0.168487	14982000	0.238302		NASP	Nuclear autoantigenic sperm protein	B4DS57;F5H3J2;P49321;P49321-3	B4DS57	T	377;413;477;479	QMKEGEEtEGsEEDD	REEQMKEGEETEGSEEDDKEN
0.168472	41737000	0.238342		REPS1	RalBP1-associated Eps domain-containing protein 1	E9PMG1;H0YDT0;Q96D71-3;Q96D71;Q96D71-2;H0YCF0;H7C1V2	E9PMG1	S	272;258;272;272;272;77;37	AIEIRRQsssyDDPW	ATTAIEIRRQSSSYDDPWKIT
0.168465	227170000	0.238363		DBN1	Drebrin	Q16643;Q16643-2;A8MV58;D6RCR4;D6R9W4	Q16643	S	142;144;142;79;141	NGLARLssPVLHRLR	RLSNGLARLSSPVLHRLRLRE
0.168302	13873000	0.23882		FBXO42	F-box only protein 42	Q6P3S6	Q6P3S6	S	488	SLAPRRGsLPDQkDL	IGLSLAPRRGSLPDQKDLRLG
0.16821	157980000	0.239077		PRPF4B	Serine/threonine-protein kinase PRP4 homolog	F5H2U2;Q13523	F5H2U2	S	340;354	GRsPKRRsLsPkPRD	RRPGRSPKRRSLSPKPRDKSR
0.16821	157980000	0.239077		PRPF4B	Serine/threonine-protein kinase PRP4 homolog	F5H2U2;Q13523	F5H2U2	S	342;356	sPKRRsLsPkPRDKS	PGRSPKRRSLSPKPRDKSRRS
0.167944	7376500	0.239824		CTNNB1	Catenin beta-1	B4DGU4;P35222;E9PDF9;E7EV28;E7EMJ5	B4DGU4	S	66;73;73;73;73	WEQGFSQsFTQEQVA	LYEWEQGFSQSFTQEQVADID
0.167714	50442000	0.240472		NUP155	Nuclear pore complex protein Nup155	E9PF10;B4DLT2;O75694-2;O75694	E9PF10	S	930;956;935;994	kAAPQsPsVPKkPGP	NQSKAAPQSPSVPKKPGPPVL
0.167659	189220000	0.240628		ESF1	ESF1 homolog	Q9H501	Q9H501	S	663	AsEEELPsDVDLNDP	AEEASEEELPSDVDLNDPYFA
0.167406	7138200	0.241341		HTATSF1	HIV Tat-specific factor 1	O43719;E9PFP2	O43719	S	732;698		DERGTLGGFGSVEEGPLSTGS
0.167331	42149000	0.241554		BMS1	Ribosome biogenesis protein BMS1 homolog	Q14692	Q14692	S	639	QNFIDEtsDIENLLK	LGPQNFIDETSDIENLLKEEE
0.167238	180910000	0.241815		LIMA1	LIM domain and actin-binding protein 1	F8VS07;F8VQE1;B4DN52;Q9UHB6-3;Q9UHB6-2;Q9UHB6;Q9UHB6-4	F8VS07	S	187;329;409;188;330;490;491	NAREtPHsPGVEDAP	QLANARETPHSPGVEDAPIAK
0.167128	35669000	0.242128		PCYT1A	Choline-phosphate cytidylyltransferase A	B4E322;P49585;C9JEJ2	B4E322	S	292;331;331	PtRERsPsPsFRWPF	SSSPTRERSPSPSFRWPFSGK
0.166938	231150000	0.242666		ARHGAP5	Rho GTPase-activating protein 5	H0YK04;Q13017-2;Q13017	H0YK04	S	54;1176;1176	RRtHsDAsDDEAFTT	SYYRRTHSDASDDEAFTTSKT
0.166927	998530000	0.242696		SRRM2	Serine/arginine repetitive matrix protein 2	I3L4D8;I3L182;Q9UQ39;Q9UQ35;Q9UQ35-2;I3L2L6	I3L4D8;Q9UQ35	S	456;360;421;456;456;456	sHREIsssPtsKNRS	APGSHREISSSPTSKNRSHGR
0.166926	3034000	0.242699		PKP4	Plakophilin-4	Q99569-2;Q99569;F8W7E2	Q99569-2	S	223;223;75	PSRAQsPsyVISTGV	SSVPSRAQSPSYVISTGVSPS
0.16691	47828000	0.242745		DCP1B	mRNA-decapping enzyme 1B	B4DRD1;Q8IZD4;F5GZK9	B4DRD1	S	173;275;149	QGVVRSLsyEEPRRH	PIRQGVVRSLSYEEPRRHSPP
0.166862	461670000	0.24288		HMGN1	Non-histone chromosomal protein HMG-14	H0Y419;A6NL93;A6NEL0;P05114	H0Y419	S	89;89;115;99	AGEkEAksD______	SDEAGEKEAKSD_________
0.166853	708230000	0.242907		CCNK	Cyclin-K	A8MZK4;G3V5E1;C9JI13;O75909-1;O75909;O75909-4	A8MZK4	S	331;329;329;329;329;329	KPsPQPssPRQVKRA	QPKKPSPQPSSPRQVKRAVVV
0.166709	27275000	0.243316		MAGED2	Melanoma-associated antigen D2	Q5H907;Q5H909;H7BXW3;Q9UNF1-2;Q9UNF1	Q5H907	S	152;134;172;172;190	LDGEEDGssDQsQAs	VKHLDGEEDGSSDQSQASGTT
0.16645	8095800	0.244054		HIST1H3A;HIST3H3;HIST2H3PS2;H3F3A;H3F3C;HIST2H3A	Histone H3.1;Histone H3.1t;Histone H3;Histone H3.3;Histone H3.3C;Histone H3.2	P68431;Q16695;Q5TEC6;P84243;B4DEB1;Q6NXT2;Q71DI3	P68431;P84243;Q71DI3	S	58;58;58;58;58;57;58	EIRRYQkstELLIRk;EIRRYQkstELLIRK	ALREIRRYQKSTELLIRKLPF
0.166432	13446000	0.244103		GOLGA4	Golgin subfamily A member 4	E7EVX2;Q13439-3;Q13439-4;Q13439;F8W8Q7;Q86W71	E7EVX2	S	120;98;98;98;120;98	EsLVRtssRESLNRL	SSKESLVRTSSRESLNRLDLD
0.16621	7119900	0.244736		LSR;FAM131B	Lipolysis-stimulated lipoprotein receptor;Protein FAM131B	B4DKL4;A6NDW3;Q86X29-3;E9PHD4;Q86X29;Q86X29-2	B4DKL4	S	276;364;412;413;432;374	GRVERAMsEVtsLHE	PPSGRVERAMSEVTSLHEDDW
0.166177	54514000	0.244832		PSIP1	PC4 and SFRS1-interacting protein	O75475;O75475-2	O75475	S	106;106	tkQsNAssDVEVEEK	QAATKQSNASSDVEVEEKETS
0.166172	1878100000	0.244845		SRRM2	Serine/arginine repetitive matrix protein 2	Q9UQ35;Q9UQ35-2;I3L2L6;F5GWZ7	Q9UQ35	S	1762;1762;1762;1014	TTsRRGRsPsPKPRG	RTKTTSRRGRSPSPKPRGLQR
0.166172	1878100000	0.244845		SRRM2	Serine/arginine repetitive matrix protein 2	Q9UQ35;Q9UQ35-2;I3L2L6;F5GWZ7	Q9UQ35	S	1764;1764;1764;1016	sRRGRsPsPKPRGLQ	KTTSRRGRSPSPKPRGLQRSR
0.166027	21384000	0.245259		KLC4	Kinesin light chain 4	B4DME9;Q9NSK0;Q9NSK0-3	B4DME9	S	534;611;629	VSRGLsAstMDLSSS	PLQVSRGLSASTMDLSSSS__
0.166004	171710000	0.245325		SMC4	Structural maintenance of chromosomes protein 4;Structural maintenance of chromosomes protein	C9JWF0;C9IYK2;C9JJ64;E7ET04;C9JR83;Q9NTJ3-2;Q9NTJ3;F8WCB7;E9PD53	C9JWF0	S	28;28;28;28;28;28;28;28;28	PsPDGAssDAEPEPP	PPPPSPDGASSDAEPEPPSGR
0.165353	19304000000	0.247191		HSP90AB1;HSP90AB2P	Heat shock protein HSP 90-beta;Putative heat shock protein HSP 90-beta 2	P08238;Q58FF8	P08238	S	255;177	PKIEDVGsDEEDDsG	EEKPKIEDVGSDEEDDSGKDK
0.165327	5879500	0.247265		PPP6R3	Serine/threonine-protein phosphatase 6 regulatory subunit 3	H0YEN2;E9PQP7;H7BXH2;E9PKF6;G8JLI3;Q5H9R7-4;Q5H9R7-6;Q5H9R7-2;Q5H9R7;Q5H9R7-5;Q5H9R7-3	H0YEN2	S	447;508;694;705;740;660;711;734;740;740;660		LSTKDSLRSNSPVEMETSTEP
0.165318	10114000	0.24729		SETD1B	Histone-lysine N-methyltransferase SETD1B	Q9UPS6	Q9UPS6	S	522		TKLLFLREPDSDTELQMEGSP
0.165252	111870000	0.247482		CD3EAP	DNA-directed RNA polymerase I subunit RPA34	O15446;O15446-2	O15446	S	285;287	PLEDtVLsPtKKRKR	NTEPLEDTVLSPTKKRKRQKG
0.165025	2378100	0.248135		AP2B1	AP-2 complex subunit beta	F5GYG9;Q7Z451;P63010;P63010-2	F5GYG9	S	431;623;680;694	VPATFAPsPTPAVVS	PSSVPATFAPSPTPAVVSSGL
0.164968	118340000	0.2483		CBX8	Chromobox protein homolog 8	Q9HC52;C9JM54;C9J6K3	Q9HC52	S	191;166;181	RVDDKPSsPGDSSKK	GTSRVDDKPSSPGDSSKKRGP
0.164897	2545000	0.248503		HSPA4	Heat shock 70 kDa protein 4	F5H3R0;P34932;Q9BUK9	F5H3R0	S	76;76;76	RFHGRAFsDPFVEAE	GFKRFHGRAFSDPFVEAEKSN
0.164894	48305000	0.248512		PRPF4B	Serine/threonine-protein kinase PRP4 homolog	F5H2U2;Q13523	F5H2U2	S	243;257	EKIGKARsPtDDKVK	RSQEKIGKARSPTDDKVKIED
0.164846	18491000	0.248649		TNKS1BP1	182 kDa tankyrase-1-binding protein	Q9C0C2;Q9C0C2-2	Q9C0C2	S	920;371	DHHGRyssQDADEQD	GKRDHHGRYSSQDADEQDWEF
0.16475	16289000	0.248927		TSC22D4	TSC22 domain family protein 4	Q9Y3Q8	Q9Y3Q8	T	229	AGGsGARtPPLsRRK	EAEAGGSGARTPPLSRRKAVD
0.16469	9641800	0.249101		SRSF10	Serine/arginine-rich splicing factor 10	O75494-2;O75494	O75494-2	S	258;259	RsWtsPKssGH____	SRSRSWTSPKSSGH_______
0.164384	30499000	0.249986		EPB41	Protein 4.1	E9PEX0;H3BLV6;P11171-6;P11171-3;P11171-5;P11171-2;P11171;C9JTS2;E9PEW9;P11171-4;P11171-7	E9PEX0	S	549;672;411;486;620;676;709;695;655;467;695	SEWDKRLstHsPFRt;SEWDKRLsTHSPFRT	PRPSEWDKRLSTHSPFRTLNI
0.164384	35540000	0.249986		EPB41	Protein 4.1	E9PEX0;H3BLV6;P11171-6;P11171-3;P11171-5;P11171-2;P11171;C9JTS2;E9PEW9;P11171-4;P11171-7	E9PEX0	S	552;675;414;489;623;679;712;698;658;470;698	DKRLSTHsPFRTLNI;DKRLstHsPFRtLNI	SEWDKRLSTHSPFRTLNINGQ
0.164221	284790000	0.250459		ACIN1	Apoptotic chromatin condensation inducer in the nucleus	Q9UKV3-5;E7EQT4;Q9UKV3	Q9UKV3-5	S	243;203;243	AAkLsEGsQPAEEEE	QARAAKLSEGSQPAEEEEDQE
0.164213	5044700	0.250481		KMT2A	Histone-lysine N-methyltransferase 2A;MLL cleavage product N320;MLL cleavage product C180	Q03164-2;Q03164;E9PQG7;E9PR05	Q03164-2	S	742;742;742;775	KRKRKVFsPIRsEPR	SNRKRKRKVFSPIRSEPRSPS
0.164213	7937600	0.250481		KMT2A	Histone-lysine N-methyltransferase 2A;MLL cleavage product N320;MLL cleavage product C180	Q03164-2;Q03164;E9PQG7;E9PR05	Q03164-2	S	750;750;750;783	PIRsEPRsPsHsMRT	VFSPIRSEPRSPSHSMRTRSG
0.164201	32454000	0.250517		EIF4G2	Eukaryotic translation initiation factor 4 gamma 2	H0Y3P2;D3DQV9;P78344-2;P78344;H0YCH5	H0Y3P2	S	395;395;395;395;395	GVIQDRFsPtMGRHR	TGPGVIQDRFSPTMGRHRSNQ
0.164118	435650000	0.250758		SCAF1	Splicing factor, arginine/serine-rich 19	Q9H7N4	Q9H7N4	S	719	KsDPRGPsPAPAssP	RLDKSDPRGPSPAPASSPKRE
0.164102	14239000	0.250805		RBM12	RNA-binding protein 12	Q9NTZ6	Q9NTZ6	S	422	sGQKRsRsRsPHEAG	KSPSGQKRSRSRSPHEAGFCV
0.164102	14239000	0.250805		RBM12	RNA-binding protein 12	Q9NTZ6	Q9NTZ6	S	424	QKRsRsRsPHEAGFC	PSGQKRSRSRSPHEAGFCVYL
0.16394	10345000	0.251273		SRSF1	Serine/arginine-rich splicing factor 1	Q07955;Q07955-3;Q07955-2	Q07955	S	2;2;2	______MsGGGVIRG	_________MSGGGVIRGPAG
0.163875	21835000	0.251464		IMPDH2	Inosine-5'-monophosphate dehydrogenase 2	H0Y4R1;P12268	H0Y4R1	S	382;426	AMDkHLssQNRyFsE	SLDAMDKHLSSQNRYFSEADK
0.163821	7482500	0.251619		NOTCH2;NOTCH1	Neurogenic locus notch homolog protein 2;Notch 2 extracellular truncation;Notch 2 intracellular domain;Neurogenic locus notch homolog protein 1;Notch 1 extracellular truncation;Notch 1 intracellular domain	Q04721;P46531	Q04721	S	2421;2516	FLtPsPEsPDQWsss	EHPYLTPSPESPDQWSSSSPH
0.163807	7822100	0.251661		HEATR5A	HEAT repeat-containing protein 5A	H7C5W6;E9PB09;F5H619;Q86XA9-2;Q86XA9	H7C5W6	S	1158;1237;1530;1524;1524		ADPDEGASNLSRPVTPTSMCQ
0.163408	15964000	0.252823		ARGLU1	Arginine and glutamate-rich protein 1	E7EUG0;Q9NWB6-2;Q9NWB6	E7EUG0	S	44;94;94	RTVSKRSsLDEKQKR	IFGRTVSKRSSLDEKQKREEE
0.163389	224930000	0.252878		NOP56	Nucleolar protein 56	O00567	O00567	S	570	sKEEPVssGPEEAVG	RKFSKEEPVSSGPEEAVGKSS
0.163187	26898000	0.253469		DCAF15	DDB1- and CUL4-associated factor 15	Q66K64	Q66K64	S	310	APARssGsPEPsPAI	PEAAPARSSGSPEPSPAIAKA
0.163157	94677000	0.253555		CDC20	Cell division cycle protein 20 homolog	Q12834;B4E1H5	Q12834	T	106;82	NQPENSQtPTkKEHQ	SKENQPENSQTPTKKEHQKAW
0.163031	7971400	0.253927		ZNF609	Zinc finger protein 609	O15014	O15014	S	804	sFtDNAPsPsIGGSS	KIYSFTDNAPSPSIGGSSRLE
0.162709	7242700	0.254869		PARVA	Alpha-parvin	F5H1R9;Q9NVD7-2;Q9NVD7	F5H1R9	S	10;10;10	tsPQKsPsVPKsPtP	_MATSPQKSPSVPKSPTPKSP
0.16264	81186000	0.255072		BAG6	Large proline-rich protein BAG6	B0UX83;G3V1Z5;P46379-2;P46379;P46379-3;F8VX53;F8VXY4;H0Y710	B0UX83	S	967;1003;967;973;1003;967;967;116	EPQRENAsPAPGttA	ASPEPQRENASPAPGTTAEEA
0.162568	5323200	0.255283		TPR	Nucleoprotein TPR	P12270	P12270	S	1803		LSSNIVEVVQSSPVERPSTST
0.162506	2822600	0.255466		PRKCA	Protein kinase C alpha type	P17252	P17252	S	226	LNPQWNEsFtFKLKP	RSTLNPQWNESFTFKLKPSDK
0.162494	299010000	0.255502		MAPT	Microtubule-associated protein;Microtubule-associated protein tau	H0Y435;I3L170;F8WAB2;C9JSN6;C9JDD6;P10636-3;P10636-2;P10636-4;P10636-6;P10636-5;P10636-7;P10636-8;P10636;P10636-9;F8VWE3	H0Y435	S	227;304;322;721;739;279;315;344;346;373;375;404;721;739;179	PVVSGDTsPRHLsNV;PVVSGDTsPRHLSNV;PVVsGDTsPRHLSNV;PVVsGDtsPRHLsNV	YKSPVVSGDTSPRHLSNVSST
0.162445	2824800	0.255645		SLC4A2	Anion exchange protein 2	P04920-2;F8W682;P04920;C9J9M9	P04920-2	S	130;135;144;144	ARALTQPsPVStPss	AEGARALTQPSPVSTPSSVQF
0.162389	35207000	0.255811		SRRM2	Serine/arginine repetitive matrix protein 2	Q9UQ35;Q9UQ35-2;I3L2L6;F5GWZ7	Q9UQ35	S	1124;1124;1124;376	DRGEFsAsPMLKsGM	IRQDRGEFSASPMLKSGMSPE
0.162374	42704000	0.255855		TCOF1	Treacle protein	E7ETY2;Q13428-7;Q13428-3;Q13428-8;E9PHK9;Q13428-6;Q13428;Q13428-4;Q13428-2	E7ETY2;E9PHK9	S	1407;1370;1408;1331;1444;1369;1407;1443;1330	KEKkGkGsLGsQGAk	GDVKEKKGKGSLGSQGAKDEP
0.162365	54501000	0.255879		MED1	Mediator of RNA polymerase II transcription subunit 1	Q15648	Q15648	S	1482	syQNsPssDDGIRPL	AEKSYQNSPSSDDGIRPLPEY
0.162054	3910700	0.256797		PRRC2C	Protein PRRC2C	E7EPN9;E9PF21;Q9Y520-6;Q9Y520-4;Q9Y520-5;Q9Y520;Q9Y520-7;Q9Y520-2;Q9Y520-3;H7C5N8	E7EPN9	S	2107;2059;2105;2105;2058;2105;2107;1862;2105;653	AQkLPDLsPVENkEH	PIKAQKLPDLSPVENKEHKPG
0.16202	3283100000	0.256897		HNRNPA1	Heterogeneous nuclear ribonucleoprotein A1;Heterogeneous nuclear ribonucleoprotein A1, N-terminally processed	F8W6I7;P09651-2;P09651;F8VRQ1;F8VXY0;F8VSB5;F8W1S7;P09651-3;F8W646;F8VTQ5	F8W6I7	S	6;6;6;6;6;6;6;6;6;6	__MsksEsPkEPEQL	_____MSKSESPKEPEQLRKL
0.161974	73339000	0.257033		AKAP8L	A-kinase anchor protein 8-like	Q9ULX6	Q9ULX6	S	283	KKRKQGGsPDEPDsk	TKKKKRKQGGSPDEPDSKATR
0.161874	5203200	0.257329		SCAF8	Protein SCAF8	Q9UPN6;B7Z888	Q9UPN6	S	345;411		EGTFGSEHSASPSQGSSQQHF
0.161648	52516000	0.257998		SRSF4	Serine/arginine-rich splicing factor 4	Q08170;E7EMJ8	Q08170	S	259;259	KEKsRsRsHSAGksR	SPSKEKSRSRSHSAGKSRSKS
0.161648	51765000	0.257998		SRSF4	Serine/arginine-rich splicing factor 4	Q08170;E7EMJ8	Q08170	S	261;261		SKEKSRSRSHSAGKSRSKSKD
0.161587	1206900000	0.258178		NOC2L	Nucleolar complex protein 2 homolog	Q9Y3T9	Q9Y3T9	S	672	kDLFDLNssEEDDtE	KQFKDLFDLNSSEEDDTEGFS
0.161547	68348000	0.258297		ACTR8	Actin-related protein 8	Q9H981-2;Q9H981;H0Y849;Q9H981-3	Q9H981-2	S	301;412;166;117	MTTLQHRsQGDPEDP	GQKMTTLQHRSQGDPEDPHDE
0.161175	13760000	0.259401		HN1L	Hematological and neurological expressed 1-like protein	H3BU16;A6NGP5;Q9H910-2;Q9H910;B4DLH4;H3BMT0;H3BTV5;H3BMV3;B4DL85	H3BU16	T	45;49;45;61;89;45;26;61;61	PQNIPKRtNPPGGkG	TEEPQNIPKRTNPPGGKGSGI
0.16117	1353700000	0.259415		PPIG	Peptidyl-prolyl cis-trans isomerase G	E9PG73;Q13427;Q32LZ0;C9JM79	E9PG73	S	398;413;413;406	ItDHRNVsEsPNRKN	ERKITDHRNVSESPNRKNEKE
0.16117	1364800000	0.259415		PPIG	Peptidyl-prolyl cis-trans isomerase G	E9PG73;Q13427;Q32LZ0;C9JM79	E9PG73	S	400;415;415;408	DHRNVsEsPNRKNEK	KITDHRNVSESPNRKNEKEKK
0.161167	245420000	0.259423		SRRM1	Serine/arginine repetitive matrix protein 1	E9PCT1;A9Z1X7;Q8IYB3;Q8IYB3-2	E9PCT1	S	461;458;463;461	KPRKVELsEsEEDKG	PAPKPRKVELSESEEDKGGKM
0.161167	245420000	0.259423		SRRM1	Serine/arginine repetitive matrix protein 1	E9PCT1;A9Z1X7;Q8IYB3;Q8IYB3-2	E9PCT1	S	463;460;465;463	RKVELsEsEEDKGGK	PKPRKVELSESEEDKGGKMAA
0.161146	33050000	0.259486		TOX4	TOX high mobility group box family member 4	B4DPY8;O94842;C9J919;C9JNL1;F8WC04	B4DPY8	S	45;68;45;97;68		HFDDLADPSSSQDGSFSAQYG
0.161108	238080000	0.259599		MYEF2	Myelin expression factor 2	Q9P2K5-4;Q9P2K5-2;Q9P2K5	Q9P2K5-4	S	17;17;17	PGAtGGDsPHLQPAE	AEVPGATGGDSPHLQPAEPPG
0.160923	10167000	0.260149		HNRNPH1;HNRNPH2	Heterogeneous nuclear ribonucleoprotein H;Heterogeneous nuclear ribonucleoprotein H, N-terminally processed;Heterogeneous nuclear ribonucleoprotein H2	E9PCY7;P31943;F5GZT4;H0YBG7;G8JLB6;H0YBK1;P55795;B4DFK9;H0YBW2	E9PCY7	S	393;413;123;149;413;81;413;368;33		SNQSSYGGPASQQLSGGYGGG
0.160904	11376000	0.260206		ERCC6L	DNA excision repair protein ERCC-6-like	B5MDQ0;Q2NKX8	B5MDQ0	S	684;807	QDGKGtGsADsIAtL	TTLQDGKGTGSADSIATLPKG
0.160904	11376000	0.260206		ERCC6L	DNA excision repair protein ERCC-6-like	B5MDQ0;Q2NKX8	B5MDQ0	S	687;810	KGtGsADsIAtLPkG	QDGKGTGSADSIATLPKGFGS
0.160733	1264000	0.260715		CLSPN	Claspin	E7ESG2;Q9HAW4-2;Q9HAW4-3;Q9HAW4	E7ESG2	S	722;711;775;775	KESSHNssFELIGST	LLTKESSHNSSFELIGSTIPS
0.160634	31268000	0.261011		LRBA	Lipopolysaccharide-responsive and beige-like anchor protein	E9PEM5;F5H1X8;P50851-2;P50851	E9PEM5	S	10;10;10;10	SEDNRVPsPPPtGDD	_MASEDNRVPSPPPTGDDGGG
0.160608	61040000	0.261088		RBM15B	Putative RNA-binding protein 15B	Q8NDT2	Q8NDT2	S	267	QYKQRsLsPVAAPPL	GGYQYKQRSLSPVAAPPLREP
0.160424	1258500000	0.261637		DKC1	H/ACA ribonucleoprotein complex subunit 4	O60832	O60832	S	494	AEPGDGDsDttKKKK	ESGAEPGDGDSDTTKKKKKKK
0.160365	21603000	0.261814		INO80B;INO80B-WBP1	INO80 complex subunit B	Q9C086;B8ZZ93;B8ZZH7;F8WCL7	Q9C086	S	130;130;135;130	LDEDsNLsPsPLRDL	RAWLDEDSNLSPSPLRDLSGG
0.160311	31613000	0.261977		FARSA	Phenylalanine--tRNA ligase alpha subunit	B4E363;Q9Y285	B4E363	S	270;301	QRVkRtHsQGGyGsQ	DYVQRVKRTHSQGGYGSQGYK
0.160258	133590000	0.262134		SRRM2	Serine/arginine repetitive matrix protein 2	Q9UQ35;Q9UQ35-2;I3L2L6;F5GWZ7	Q9UQ35	S	1099;1099;1099;351	tsPKGGRsRsssPVt	KSQTSPKGGRSRSSSPVTELA
0.160258	133590000	0.262134		SRRM2	Serine/arginine repetitive matrix protein 2	Q9UQ35;Q9UQ35-2;I3L2L6;F5GWZ7	Q9UQ35	S	1101;1101;1101;353	PKGGRsRsssPVtEL	QTSPKGGRSRSSSPVTELASR
0.160258	761890000	0.262134		SRRM2	Serine/arginine repetitive matrix protein 2	Q9UQ35;Q9UQ35-2;I3L2L6;F5GWZ7	Q9UQ35	S	1103;1103;1103;355	GGRsRsssPVtELAs	SPKGGRSRSSSPVTELASRSP
0.160247	97203000	0.262168		DFFA	DNA fragmentation factor subunit alpha	O00273	O00273	S	315	SIsAsKAsPPGDLQN	SLRSISASKASPPGDLQNPKR
0.160172	7017300	0.262391		CAAP1	Caspase activity and apoptosis inhibitor 1	Q9H8G2;B4DWT4	Q9H8G2	S	312;167	ILGLAEssPNEPKAA	VNEILGLAESSPNEPKAATLA
0.160139	7861200	0.262491		PTPN13	Tyrosine-protein phosphatase non-receptor type 13	Q12923-3;Q12923;Q12923-4;Q12923-2	Q12923-3	S	1302;1321;1321;1130		DVTDYSDRGDSDMDEATYSSS
0.16001	6417000	0.262877		PIAS1	E3 SUMO-protein ligase PIAS1	O75925;B3KSY9;H3BS65	O75925	S	503;505;10	LsLPHQAsPVsRtPs	KGILSLPHQASPVSRTPSLPA
0.16001	2873300	0.262877		PIAS1	E3 SUMO-protein ligase PIAS1	O75925;B3KSY9;H3BS65	O75925	S	510;512;17	sPVsRtPsLPAVDTS	HQASPVSRTPSLPAVDTSYIN
0.159965	96618000	0.263014		HSP90AB1	Heat shock protein HSP 90-beta	P08238	P08238	S	226	kEREKEIsDDEAEEE	YLEKEREKEISDDEAEEEKGE
0.159914	6428500	0.263165		NUP214	Nuclear pore complex protein Nup214	P35658-2;P35658-4;P35658;P35658-3;P35658-5;Q5JUP9;F5H131	P35658-2	S	646;647;657;658;646;251;86	RsAQGsssPVPsMVQ;RsAQGSSsPVPSMVQ	PSGRSAQGSSSPVPSMVQKSP
0.159902	14091000	0.263203		ADD2	Beta-adducin	C9JTM0;P35612	C9JTM0	S	365;613	AKEAEtKsPLVsPsK	QSPAKEAETKSPLVSPSKSLE
0.159902	14091000	0.263203		ADD2	Beta-adducin	C9JTM0;P35612	C9JTM0	S	369;617	EtKsPLVsPsKsLEE	KEAETKSPLVSPSKSLEGTKK
0.159716	158430000	0.263761		PRPF38A	Pre-mRNA-splicing factor 38A	Q8NAV1;Q8NAV1-2	Q8NAV1	S	209;22	EKLERVPsPDHRRRs	EEDEKLERVPSPDHRRRSYRD
0.159668	9396500	0.263905				E7ETI8	E7ETI8	S	2		_________MSQEGAVPASAV
0.159668	9396500	0.263905				E7ETI8	E7ETI8	S	10		_MSQEGAVPASAVPLEELSSW
0.159665	36159000	0.263913		SMARCA4	Transcription activator BRG1	Q9HBD4;F5H0X5;P51532-5;P51532-2;P51532-3;P51532-4;P51532	Q9HBD4	S	695;759;695;695;695;695;695	KKIPDPDsDDVsEVD	EEKKKIPDPDSDDVSEVDARH
0.159664	57315000	0.263916		SRRM2	Serine/arginine repetitive matrix protein 2	Q9UQ35;Q9UQ35-2;I3L2L6;F5GWZ7	Q9UQ35	S	1916;1916;1916;1168	RRsRsRAsPVsRRRs	VTRRRSRSRASPVSRRRSRSR
0.159637	3913500	0.263996		EPN2	Epsin-2	I3L2B2;I3L0K8;E9PBC2;O95208-3;O95208-2;O95208;I3L2H1;A8MTV8	I3L2B2	S	506;507;513;473;512;570;278;285	TLNQLRGsPVLGTST	QPLTLNQLRGSPVLGTSTSFG
0.159112	115700000	0.265579		COPS3	COP9 signalosome complex subunit 3	B4DY81;Q9UNS2	B4DY81	S	390;410	FVQksMGsQEDDsGN	NPQFVQKSMGSQEDDSGNKPS
0.159059	2938700	0.265741		CCNYL1	Cyclin-Y-like protein 1	Q8N7R7-3;Q8N7R7-2;Q8N7R7	Q8N7R7-3	S	274;293;344	AAMRRsFsADNFIGI	LCRAAMRRSFSADNFIGIQRS
0.159053	56672000	0.265759		IRS4	Insulin receptor substrate 4	O14654	O14654	S	1091	RPQSRSQsFFAAARA	ERRRPQSRSQSFFAAARAAVS
0.159025	603740000	0.265842		SYAP1	Synapse-associated protein 1	Q96A49	Q96A49	S	269	DEEEIstsPGVsEFV	TQEDEEEISTSPGVSEFVSDA
0.158972	216770000	0.266004		CAP2	Adenylyl cyclase-associated protein;Adenylyl cyclase-associated protein 2	B7Z385;E9PDI0;E9PDI2;B7Z1C4;P40123	B7Z385	S	189;218;275;237;301	AQGGQtQsPTKsHtP	SLRAQGGQTQSPTKSHTPSPT
0.15888	5454400	0.266281		CTNNB1	Catenin beta-1	B4DGU4;P35222	B4DGU4	S	545;552	QDtQRRtsMGGtQQQ	RAHQDTQRRTSMGGTQQQFVE
0.15888	5454400	0.266281		CTNNB1	Catenin beta-1	B4DGU4;P35222	B4DGU4	T	544;551	HQDtQRRtsMGGtQQ	VRAHQDTQRRTSMGGTQQQFV
0.15862	5496000	0.267069		ARFGAP1	ADP-ribosylation factor GTPase-activating protein 1	E5RHH7;F8W1U7;F8VWH9;B7Z8H8;E7EV62;Q8N6T3;Q8N6T3-2	E5RHH7	S	60;230;238;191;259;304;312	KAEGPLDsPSEGHSy	FSGKAEGPLDSPSEGHSYQNS
0.158304	265860000	0.268027		KCTD12	BTB/POZ domain-containing protein KCTD12	Q96CX2	Q96CX2	S	176	GAsAGAPsPtLELAs	QQEGASAGAPSPTLELASRSP
0.158078	8937800	0.268715		MLLT1	Protein ENL	Q03111	Q03111	S	267	ETKLEstsPKGGPPP	ALKETKLESTSPKGGPPPPPP
0.158067	250730000	0.26875		LSR;FAM131B	Lipolysis-stimulated lipoprotein receptor;Protein FAM131B	B4DKL4;A6NDW3;Q86X29-3;E9PHD4;Q86X29;Q86X29-2	B4DKL4	S	487;575;623;624;643;585	LKKNLALsREsLVV_	ERRLKKNLALSRESLVV____
0.158022	2384900	0.268886		UTRN		Q5JT49;Q5JT44;H0Y337	Q5JT49	S	94;128;213	NLEtPsQsPQLFHDD	EGDNLETPSQSPQLFHDDTHS
0.158022	2384900	0.268886		UTRN		Q5JT49;Q5JT44;H0Y337	Q5JT49	T	90;124;209	LEGDNLEtPsQsPQL	QTVLEGDNLETPSQSPQLFHD
0.157854	42101000	0.269398		DYNC1LI1	Cytoplasmic dynein 1 light intermediate chain 1	E9PHI6;Q9Y6G9	E9PHI6	S	282;398	AGRPVDAsPRVPGGs	PTAAGRPVDASPRVPGGSPRT
0.157755	437620000	0.2697		SRRM2	Serine/arginine repetitive matrix protein 2	I3L4D8;I3L182;Q9UQ39;I3L1I8;Q9UQ35-3;Q9UQ35;Q9UQ35-2;I3L2L6	I3L4D8;Q9UQ35	S	351;255;316;255;255;351;351;351	EKsAtRPsPsPERss	DKKEKSATRPSPSPERSSTGP
0.157578	1267600	0.270239		STX12	Syntaxin-12	B1AJQ6;Q86Y82	B1AJQ6	S	2;2	______MsYGPLDMY	_________MSYGPLDMYRNP
0.157465	19436000	0.270586		DDX46	Probable ATP-dependent RNA helicase DDX46	Q7L014;F5GYY8	Q7L014	S	102;102		RSRSRSRGRRSRSSSPGNKSK
0.157465	19436000	0.270586		DDX46	Probable ATP-dependent RNA helicase DDX46	Q7L014;F5GYY8	Q7L014	S	104;104		RSRSRGRRSRSSSPGNKSKKT
0.157465	19436000	0.270586		DDX46	Probable ATP-dependent RNA helicase DDX46	Q7L014;F5GYY8	Q7L014	S	105;105	RGRRSRSsSPGNKSK	SRSRGRRSRSSSPGNKSKKTE
0.157408	12084000	0.270761		MED15	Mediator of RNA polymerase II transcription subunit 15	F5GZU5;G3V1P5;Q96RN5-3;Q96RN5-2;Q96RN5;B4DGD6	F5GZU5	S	354;439;394;465;505;435	PQNFSVPsPGPLNTP	ARTPQNFSVPSPGPLNTPVNP
0.157201	93128000	0.271395		PIP5K1A	Phosphatidylinositol 4-phosphate 5-kinase type-1 alpha	A6PW57;Q99755-4;Q99755-3;Q99755	A6PW57	S	455;427;454;467		PSPSKKFRSGSSFSRRAGSSG
0.157139	655650000	0.271585		SRRM2	Serine/arginine repetitive matrix protein 2	Q9UQ35;Q9UQ35-2;I3L2L6;F5GWZ7	Q9UQ35	S	1320;1320;1320;572	EHKELsNsPLRENsF	FSPEHKELSNSPLRENSFGSP
0.157101	2081500	0.271702		PUM2	Pumilio homolog 2	Q8TB72-2;B4E2B6;Q8TB72-3;Q8TB72;C9JW01	Q8TB72-2	S	82;26;82;82;82	sEVNAILsPRSESGG	HGNSEVNAILSPRSESGGLGV
0.157064	114530000	0.271814		PEA15	Astrocytic phosphoprotein PEA-15	B1AKZ5;Q15121	B1AKZ5	S	94;116	KDIIRQPsEEEIIKL	KKYKDIIRQPSEEEIIKLAPP
0.157001	293490000	0.272007		UBAP2L	Ubiquitin-associated protein 2-like	F8W726;Q14157-4;Q14157-1;Q14157-3;Q14157;Q14157-5;C9JD99;F5GY23	F8W726	S	620;602;609;609;609;609;105;105	YPssISssPQKDLTQ;yPssIsssPQkDLtQ	TRRYPSSISSSPQKDLTQAKN
0.156991	364050000	0.272037		HIRIP3	HIRA-interacting protein 3	Q9BW71	Q9BW71	S	223	GTKsLKEsEQEsEEE	GNKGTKSLKESEQESEEEILA
0.156991	379800000	0.272037		HIRIP3	HIRA-interacting protein 3	Q9BW71	Q9BW71	S	227	LKEsEQEsEEEILAQ	TKSLKESEQESEEEILAQKKE
0.156921	5793700	0.272253		GTF3C1	General transcription factor 3C polypeptide 1	Q12789;H3BU37	Q12789	S	1936;41		QEDQEGVGEFSSPGQEQLSGQ
0.156845	47330000	0.272487		RGPD5;RGPD8;RGPD6;RANBP2;RGPD3;RGPD4;RGPD1;RGPD2	RANBP2-like and GRIP domain-containing protein 5/6;RANBP2-like and GRIP domain-containing protein 8;E3 SUMO-protein ligase RanBP2;RanBP2-like and GRIP domain-containing protein 3;RanBP2-like and GRIP domain-containing protein 4;RANBP2-like and GRIP domain-containing protein 1;RANBP2-like and GRIP domain-containing protein 2	Q99666;O14715;H7BZ48;P49792;E9PGT0;A6NKT7;Q7Z3J3;F8VYC4;P0DJD0;P0DJD1;E7ES93;B4DTM4	Q99666;P49792	S	1478;1478;20;2454;1478;1479;1479;1471;1463;1471;382;382	sLItPHVsRsstPRE	EKDSLITPHVSRSSTPRESPC
0.156845	32248000	0.272487		RGPD5;RGPD8;RGPD6;RANBP2;RGPD3;RGPD4;RGPD1;RGPD2	RANBP2-like and GRIP domain-containing protein 5/6;RANBP2-like and GRIP domain-containing protein 8;E3 SUMO-protein ligase RanBP2;RanBP2-like and GRIP domain-containing protein 3;RanBP2-like and GRIP domain-containing protein 4;RANBP2-like and GRIP domain-containing protein 1;RANBP2-like and GRIP domain-containing protein 2	Q99666;O14715;H7BZ48;P49792;E9PGT0;A6NKT7;Q7Z3J3;F8VYC4;P0DJD0;P0DJD1;E7ES93;B4DTM4	Q99666;P49792	T	1474;1474;16;2450;1474;1475;1475;1467;1459;1467;378;378	QEKDsLItPHVsRss	KTAQEKDSLITPHVSRSSTPR
0.156677	1794600	0.273003		HNRNPA2B1	Heterogeneous nuclear ribonucleoproteins A2/B1	P22626-2;P22626	P22626-2	S	213;225	NFGPGPGsNFrGGsD	GGGNFGPGPGSNFRGGSDGYG
0.156642	128930000	0.273111		PDHA1;PDHA2	Pyruvate dehydrogenase E1 component subunit alpha, somatic form, mitochondrial;Pyruvate dehydrogenase E1 component subunit alpha, testis-specific form, mitochondrial	P08559-3;P08559;P08559-2;P08559-4;Q5JPU3;P29803	P08559-3	S	264;295;302;333;14;293	RyHGHsMsDPGVsyR	QTYRYHGHSMSDPGVSYRTRE
0.156625	1042200000	0.273165		CCDC86	Coiled-coil domain-containing protein 86	Q9H6F5	Q9H6F5	S	102	QQDLHLEsPQRQPEy	PQRQQDLHLESPQRQPEYSPE
0.156625	281940000	0.273165		CCDC86	Coiled-coil domain-containing protein 86	Q9H6F5	Q9H6F5	S	110	PQRQPEysPEsPRCQ	LESPQRQPEYSPESPRCQPKP
0.156625	1244900000	0.273165		CCDC86	Coiled-coil domain-containing protein 86	Q9H6F5	Q9H6F5	S	113	QPEysPEsPRCQPKP	PQRQPEYSPESPRCQPKPSEE
0.1566	3373000	0.273241		NUP205	Nuclear pore complex protein Nup205	Q92621	Q92621	S	1939	KSRRLQDsFAsEtNL	TLFKSRRLQDSFASETNLDFR
0.1566	3373000	0.273241		NUP205	Nuclear pore complex protein Nup205	Q92621	Q92621	S	1942	RLQDsFAsEtNLDFR	KSRRLQDSFASETNLDFRSGL
0.156534	101500000	0.273445		BCLAF1	Bcl-2-associated transcription factor 1	Q9NYF8-2;Q9NYF8;E9PK91;Q9NYF8-3;E9PQN2;E9PKI6;E9PK09	Q9NYF8-2	S	448;450;450;448;448;450;450	sLkGNREsDGFREEK	SKVSLKGNRESDGFREEKNYK
0.156501	14017000	0.273547		SLC4A7	Sodium bicarbonate cotransporter 3;Anion exchange protein	E9PDL9;Q9Y6M7-2;B5M452;B2CI53;D3K174;Q9Y6M7;C9JRP1;B6DY53;Q9Y6M7-4;Q9Y6M7-3	E9PDL9	S	251;242;247;247;251;242;242;247;152;152	ADIGKKHsDPHLLER	RSFADIGKKHSDPHLLERNGE
0.156477	22044000	0.27362		GPATCH2	G patch domain-containing protein 2	Q9NW75-2;Q9NW75	Q9NW75-2	S	284;284	RQGDDEQsDWFYEKE	DEGRQGDDEQSDWFYEKESGG
0.15632	42424000	0.274106		ERCC5	DNA repair protein complementing XP-G cells	F8WDY3;I3L0G8;P28715	F8WDY3	S	395;988;563	FDssLLssDDEtKCK	ESKFDSSLLSSDDETKCKPNS
0.156193	28289000	0.274497		MARCKSL1	MARCKS-related protein	P49006	P49006	S	116	RkEGGGDssAssPtE	KRNRKEGGGDSSASSPTEEEQ
0.156193	28289000	0.274497		MARCKSL1	MARCKS-related protein	P49006	P49006	S	119	GGGDssAssPtEEEQ	RKEGGGDSSASSPTEEEQEQG
0.15612	23270000	0.274721		C20orf27	UPF0687 protein C20orf27	H7BYU9;E9PAL2;Q9GZN8;Q9GZN8-2	H7BYU9	S	118;124;165;190	GAELEyDsEHsDWHG	KCVGAELEYDSEHSDWHGFD_
0.15612	53304000	0.274721		C20orf27	UPF0687 protein C20orf27	H7BYU9;E9PAL2;Q9GZN8;Q9GZN8-2	H7BYU9	S	121;127;168;193	LEyDsEHsDWHGFD_	GAELEYDSEHSDWHGFD____
0.156076	3224900	0.274857		NCL	Nucleolin	C9JWL1;C9JYW2;C9JLB1;C9J1H7;P19338;Q9BQ02	C9JWL1;P19338	T	90;90;90;90;106;106	tPAkAVttPGkkGAt	KTVTPAKAVTTPGKKGATPGK
0.156019	85926000	0.275034		LUZP1	Leucine zipper protein 1	Q86V48-2;Q86V48-3;Q86V48	Q86V48-2	S	394;394;394	KHTARELsPQHKRER	SVSKHTARELSPQHKRERLRN
0.155735	37523000	0.275914		KIDINS220	Kinase D-interacting substrate of 220 kDa	Q9ULH0-2;Q9ULH0-4;Q9ULH0;Q9ULH0-5	Q9ULH0-2	S	1422;1502;1521;293	LRYQKLPsDEDEsGt	GSGLRYQKLPSDEDESGTEES
0.15562	62928000	0.276272		MYH14	Myosin-14	F2Z2U9;F2Z2U8;G8JLL9;Q7Z406-4;Q7Z406;Q7Z406-6;Q7Z406-2	F2Z2U9	S	1767;2016;2024;1767;1983;1991;2024	AQPGsGPsPEPEGsP	AEEAQPGSGPSPEPEGSPPAH
0.155487	33046000	0.276683		TMEM45A	Transmembrane protein 45A	Q9NWC5	Q9NWC5	S	271	NAEREQEsEEEM___	LLKNAEREQESEEEM______
0.155435	1364800000	0.276846		PPIG	Peptidyl-prolyl cis-trans isomerase G	E9PG73;Q13427;Q32LZ0;C9JM79	E9PG73	S	400;415;415;408	DHRNVsEsPNRKNEK	KITDHRNVSESPNRKNEKEKK
0.155363	91867000	0.277069		SCARF2	Scavenger receptor class F member 2	Q96GP6-2;Q96GP6	Q96GP6-2	S	648;653	GGLsLsPsPERRKPP	GEIGGLSLSPSPERRKPPPPD
0.155007	38626000	0.278176		WAC	WW domain-containing adapter protein with coiled-coil	C9JMU2;E9PMZ7;F8WEL1;C9JVK6;C9JD58;B4DMH1;Q9BTA9-3;Q9BTA9-5;Q9BTA9-2;Q9BTA9	C9JMU2;Q9BTA9-5	S	19;19;19;19;19;19;19;64;19;64	KMLRRsDsPENKysD	PPNKMLRRSDSPENKYSDSTG
0.154723	817500000	0.279063		PDCL3	Phosducin-like protein 3	Q9H2J4	Q9H2J4	S	234	sVLMkRDsDsEGD__	VRRSVLMKRDSDSEGD_____
0.154567	244840000	0.279552		HIST1H1C	Histone H1.2	P16403	P16403	T	146	KkAAGGAtPKKSAKK	KKPKKAAGGATPKKSAKKTPK
0.154495	120320000	0.279776		LEMD3	Inner nuclear membrane protein Man1	Q9Y2U8	Q9Y2U8	S	144	LGFssDEsDVEAsPR	KVLLGFSSDESDVEASPRDQA
0.154421	12755000	0.280009		BCL11A	B-cell lymphoma/leukemia 11A	B4DT16;F5H2Y4;E9PEP4;Q9H165-2;Q9H165-4;Q9H165-6;Q9H165;Q9H165-3;Q9H165-5	B4DT16	S	53;171;241;205;239;171;205;205;239		LRIYLESEHGSPLTPRSNLVV
0.154421	5605900	0.280009		BCL11A	B-cell lymphoma/leukemia 11A	B4DT16;F5H2Y4;E9PEP4;Q9H165-2;Q9H165-4;Q9H165-6;Q9H165;Q9H165-3;Q9H165-5	B4DT16	T	56;174;244;208;242;174;208;208;242		YLESEHGSPLTPRSNLVVHRR
0.154293	34361000	0.280409		TRA2B	Transformer-2 protein homolog beta	P62995	P62995	S	26	RSGSAHGsGKsARHt	SASRSGSAHGSGKSARHTPAR
0.154191	162710000	0.280729		RALY	RNA-binding protein Raly	Q9UKM9-2;Q9UKM9	Q9UKM9-2	T	282;298	ELEHSQDtDADDGAL;ELEHsQDtDADDGAL	SEEELEHSQDTDADDGALQ__
0.154168	648330000	0.280801		RBM39	RNA-binding protein 39	G3XAC6;Q14498-2;Q14498;Q5QP22;Q5QP23	G3XAC6	S	97;97;97;97;97	RFRGRyRsPysGPkF	RDRRFRGRYRSPYSGPKFNSA
0.154168	17071000	0.280801		RBM39	RNA-binding protein 39	G3XAC6;Q14498-2;Q14498;Q5QP22;Q5QP23	G3XAC6	S	100;100;100;100;100	GRyRsPysGPkFNsA	RFRGRYRSPYSGPKFNSAIRG
0.154164	53991000	0.280813		DHX9	ATP-dependent RNA helicase A	Q08211;F5GXA5	Q08211	S	321;321	KLAQFEPsQRQNQVG	NIGKLAQFEPSQRQNQVGVVP
0.154104	203930000	0.281001		SRRM2	Serine/arginine repetitive matrix protein 2	Q9UQ35;Q9UQ35-2;I3L2L6;F5GWZ7	Q9UQ35	S	1462;1462;1462;714	sRHsLsGssPGMkDI	GTPSRHSLSGSSPGMKDIPRT
0.153946	6588500	0.281498		XPC	DNA repair protein complementing XP-C cells	E9PH69;Q01831	E9PH69	S	237;274		TFTVNAELSASEQDNLQTTLE
0.153862	217720000	0.281762		PRCC	Proline-rich protein PRCC	A6NG79;E9PGC6;Q92733	A6NG79	S	157;101;157	PELHKGDsDsEEDEP	IAAPELHKGDSDSEEDEPTKK
0.153862	217720000	0.281762		PRCC	Proline-rich protein PRCC	A6NG79;E9PGC6;Q92733	A6NG79	S	159;103;159	LHKGDsDsEEDEPtK	APELHKGDSDSEEDEPTKKKT
0.153852	13077000	0.281795		MIOS	WD repeat-containing protein mio	Q9NXC5	Q9NXC5	S	766	sQyGVsGsPtKsKVt	RGFSQYGVSGSPTKSKVTSCP
0.153808	18255000	0.281933		SFSWAP	Splicing factor, suppressor of white-apricot homolog	Q12872;F5H6B8	Q12872	S	832;884	VPTAyRVsRsPGAsR	ERSVPTAYRVSRSPGASRKRT
0.153808	190830000	0.281933		SFSWAP	Splicing factor, suppressor of white-apricot homolog	Q12872;F5H6B8	Q12872	S	834;886	TAyRVsRsPGAsRKR	SVPTAYRVSRSPGASRKRTRS
0.15379	49317000	0.28199		AIFM1	Apoptosis-inducing factor 1, mitochondrial	Q1L6K4;O95831-4;O95831-3;O95831	Q1L6K4	S	181;268;264;268	GGtPRsLsAIDRAGA	IATGGTPRSLSAIDRAGAEVK
0.153733	2846700	0.282167		DMWD	Dystrophia myotonica WD repeat-containing protein	G5E9A7;Q09019	G5E9A7	S	493;493	LPRSLSRsNsLPHPA	PGPLPRSLSRSNSLPHPAGGG
0.15351	13871000	0.28287		CEP135	Centrosomal protein of 135 kDa	Q66GS9	Q66GS9	S	1134	TLRsPsHsPEHRNV_	LSSTLRSPSHSPEHRNV____
0.153435	10545000	0.283108		YARS2	Tyrosine--tRNA ligase;Tyrosine--tRNA ligase, mitochondrial	H0YHS6;Q9Y2Z4	H0YHS6	T	43;69		IELPELFDRGTASFPQTIYCG
0.153381	51836000	0.283277		TMPO	Lamina-associated polypeptide 2, isoforms beta/gamma;Thymopoietin;Thymopentin	P42167;G5E972;H0YJH7;P42167-2	P42167	S	184;184;91;184	sNDsDRysDNEEDsK	QNGSNDSDRYSDNEEDSKIEL
0.153322	43573000	0.283463		GTF3C6	General transcription factor 3C polypeptide 6	Q969F1	Q969F1	S	199		EDSGPLIDIPSETEGSVFMET
0.152925	1145800000	0.284718		CTPS1	CTP synthase 1	B4DR64;P17812	B4DR64	S	344;575	sDRsGsssPDsEItE	DTYSDRSGSSSPDSEITELKF
0.152865	27883000	0.284908		MAPT	Microtubule-associated protein;Microtubule-associated protein tau	H0Y435;I3L170;F8WAB2;C9JSN6;C9JDD6;P10636-3;P10636-2;P10636-4;P10636-6;P10636-5;P10636-7;P10636-8;P10636;P10636-9	H0Y435	S	53;130;148;516;534;105;141;170;141;199;170;199;516;534	GDRSGYssPGsPGTP;GDRsGYssPGsPGtP;GDRsGyssPGsPGtP	PKSGDRSGYSSPGSPGTPGSR
0.152865	84920000	0.284908		MAPT	Microtubule-associated protein;Microtubule-associated protein tau	H0Y435;I3L170;F8WAB2;C9JSN6;C9JDD6;P10636-3;P10636-2;P10636-4;P10636-6;P10636-5;P10636-7;P10636-8;P10636;P10636-9	H0Y435	S	56;133;151;519;537;108;144;173;144;202;173;202;519;537	SGYssPGsPGTPGSR;SGYSSPGsPGtPGSR;sGYssPGsPGtPGSR;sGyssPGsPGtPGsR	GDRSGYSSPGSPGTPGSRSRT
0.152806	64762000	0.285096		KIAA0907	UPF0469 protein KIAA0907	Q7Z7F0	Q7Z7F0	S	571	LVAYAADssDEEEEH	GFGLVAYAADSSDEEEEHGGH
0.152806	64762000	0.285096		KIAA0907	UPF0469 protein KIAA0907	Q7Z7F0	Q7Z7F0	S	572	VAYAADssDEEEEHG	FGLVAYAADSSDEEEEHGGHK
0.152773	80609000	0.285201		TCOF1	Treacle protein	E7ETY2;Q13428-7;Q13428-3;Q13428-8;Q13428-5;E9PHK9;Q13428-6;Q13428;Q13428-4;Q13428-2	E7ETY2;E9PHK9	S	375;375;375;298;375;375;375;375;375;298	tsQVGAAsAPAKEsP	SGKTSQVGAASAPAKESPRKG
0.152673	236900000	0.285519		HLTF	Helicase-like transcription factor	F5H3D6;Q14527;Q14527-2	F5H3D6	S	394;397;275	tAVQyIEssDsEEIE	RRKTAVQYIESSDSEEIETSE
0.152671	5543200	0.285525		TBC1D4	TBC1 domain family member 4	O60343-2;O60343-3;O60343;Q5JU47;O60343-4;O60343-5	O60343-2	S	746;801;809;258;26;26	LLPLsPLsPTMEEEP	RNELLPLSPLSPTMEEEPLVV
0.1526	14933000	0.285749		SORT1	Sortilin	B4DWI3;Q99523	B4DWI3	S	688;825	KsGyHDDsDEDLLE_	HTNKSGYHDDSDEDLLE____
0.152579	17601000	0.285816		SIRT2	NAD-dependent protein deacetylase sirtuin-2	Q8IXJ6;Q8IXJ6-2;Q8IXJ6-3	Q8IXJ6	S	368;331;348	PNPsTsAsPKKsPPP;PNPSTSAsPKKSPPP	AGVPNPSTSASPKKSPPPAKD
0.152525	5912000	0.285988		TRIM33	E3 ubiquitin-protein ligase TRIM33	E7EN20;H0Y612;Q9UPN9-2;Q9UPN9	E7EN20	S	359;488;727;727	SPGPSALsPGSSGLS	MNPSPGPSALSPGSSGLSNSH
0.152409	27370000	0.286356		HS1BP3	HCLS1-binding protein 3	H7BZZ1;F6TR53;Q53T59	H7BZZ1	S	13;194;194	KGEDAEEsLEEEEAL	QSLKGEDAEESLEEEEALDPL
0.15224	3257000	0.286895		FTSJ3	pre-rRNA processing protein FTSJ3	Q8IY81	Q8IY81	S	549	ADEALEIsQAQLLFE	EDDADEALEISQAQLLFENRR
0.152197	17066000	0.287032		FBXO42	F-box only protein 42	Q6P3S6	Q6P3S6	S	552	sALAGAVsPGALRRs	HVASALAGAVSPGALRRSLEA
0.152067	88712000	0.287445		SRRM2	Serine/arginine repetitive matrix protein 2	Q9UQ35;Q9UQ35-2;I3L2L6;F5GWZ7	Q9UQ35	S	1818;1818;1818;1070	TRRRRGGsGYHsRsP	SRVTRRRRGGSGYHSRSPARQ
0.151583	446080000	0.288992		SF3B1	Splicing factor 3B subunit 1	O75533	O75533	T	244	GRAKGsEtPGAtPGs	ETPGRAKGSETPGATPGSKIW
0.151432	45602000	0.289474		EMD	Emerin	P50402;Q5HY57	P50402	S	173;138	HyRPVsAsRssLDLs	SITHYRPVSASRSSLDLSYYP
0.151354	2902000	0.289725		MAZ	Myc-associated zinc finger protein	F5H7A6;C6G496;P56270;H3BPU3;I3L0V8;H3BQS2;H3BQD6	F5H7A6	S	244;446;469;70;64;144;164		LSGAEGVPVSSQPLPSQPW__
0.151347	54999000	0.289746		RAD50	DNA repair protein RAD50	E7EN38;Q92878-3;Q92878;Q92878-2	E7EN38	S	574;496;635;641	KLFDVCGsQDFEsDL	YEDKLFDVCGSQDFESDLDRL
0.151221	2726600	0.29015		AAK1	AP2-associated protein kinase 1	Q2M2I8-2;Q2M2I8;E9PG46	Q2M2I8-2	S	21;21;21	sGLGsGssGGGGsTS	QGGSGLGSGSSGGGGSTSGLG
0.151202	13821000	0.290211		GBF1	Golgi-specific brefeldin A-resistance guanine nucleotide exchange factor 1	Q92538	Q92538	S	349	VEKSQSAsVEsIPEV	GTHVEKSQSASVESIPEVLEE
0.15113	72660000	0.290444		EXOSC9	Exosome complex component RRP45	D6RIY6;Q06265-3;Q06265;H0Y9L5;Q06265-4;Q06265-2	D6RIY6;Q06265-4	S	337;269;353;140;269;353	sWGDLEDsEKEDDEG	VENSWGDLEDSEKEDDEGGGD
0.151073	5940500	0.290627		PTOV1	Prostate tumor-overexpressed gene 1 protein	Q86YD1	Q86YD1	S	34	LVVRAVRsRsWPAsP	PRPLVVRAVRSRSWPASPRGP
0.151012	83488000	0.29082		MOB1B;MOB1A	MOB kinase activator 1A;MOB kinase activator 1B	D6RCK3;H7BZ12;Q9H8S9-2;Q9H8S9;Q7L9L4;B4DRY3	D6RCK3	T	40;35;35;35;35;40	LLKHAEAtLGsGNLR	QYELLKHAEATLGSGNLRMAV
0.150961	40964000	0.290986		NAF1	H/ACA ribonucleoprotein complex non-core subunit NAF1	E9PAZ2;Q96HR8	E9PAZ2	S	315;315	PPEALDFsDDEKEKE	QEPPPEALDFSDDEKEKEAKQ
0.150898	735930000	0.291188		HSPH1	Heat shock protein 105 kDa	Q92598-2;Q92598-3;Q92598;B4DYH1;Q5TBM3;F2Z3D7;B4DY72	Q92598-2	S	765;768;809;811;73;95;628	QPKPKIEsPkLERtP	VVTQPKPKIESPKLERTPNGP
0.150391	11218000	0.292822		BCLAF1	Bcl-2-associated transcription factor 1	Q9NYF8-2;Q9NYF8;Q9NYF8-4	Q9NYF8-2	T	838;840;667	EEWDPEytPKSKkyF	PKEEEWDPEYTPKSKKYFLHD
0.150176	364890000	0.293516		RPS3	40S ribosomal protein S3	P23396;E9PPU1;E9PL09;H0YEU2;E9PSF4	P23396	T	221;136;209;149;95	kDEILPttPIsEQkG	VEPKDEILPTTPISEQKGGKP
0.150172	45264000	0.293528		ELAC2	Zinc phosphodiesterase ELAC protein 2	E7ES68;G5E9D5;Q9BQ52-2;Q9BQ52	E7ES68	S	22;180;105;199	GKHQPWQsPERPLsR	QRRGKHQPWQSPERPLSRLSP
0.150155	3033800	0.293583		PRRT4	Proline-rich transmembrane protein 4	C9JH25-3;C9JH25	C9JH25-3	S	685;891	CRQIDELsVGSDTID	LDACRQIDELSVGSDTIDL__
0.150155	3033800	0.293583		PRRT4	Proline-rich transmembrane protein 4	C9JH25-3;C9JH25	C9JH25-3	S	688;894		CRQIDELSVGSDTIDL_____
0.150155	3033800	0.293583		PRRT4	Proline-rich transmembrane protein 4	C9JH25-3;C9JH25	C9JH25-3	T	690;896		QIDELSVGSDTIDL_______
0.15001	9087500	0.294052		DNAJC21	DnaJ homolog subfamily C member 21	Q5F1R6;Q5F1R6-3;Q5F1R6-2	Q5F1R6	S	302;302;302	DEEDGKDsDEAEDAE	ELKDEEDGKDSDEAEDAELYD
0.149975	63289000	0.294166		WRAP53	Telomerase Cajal body protein 1	E9PMG4;Q9BUR4;E9PMR3	E9PMG4	S	85;85;85	PLEtEFGsPsELsPR	LSTPLETEFGSPSELSPRIEE
0.149975	68610000	0.294166		WRAP53	Telomerase Cajal body protein 1	E9PMG4;Q9BUR4;E9PMR3	E9PMG4	S	90;90;90	FGsPsELsPRIEEQE	ETEFGSPSELSPRIEEQELSE
0.149953	101950000	0.294238		CWC22	Pre-mRNA-splicing factor CWC22 homolog	B7WP27;Q9HCG8;B7WP74	B7WP27	S	88;88;88		ERERDTDRKRSRKSPSPGRRN
0.149802	71274000	0.294726		FKBP4	Peptidyl-prolyl cis-trans isomerase FKBP4;Peptidyl-prolyl cis-trans isomerase FKBP4, N-terminally processed	Q02790	Q02790	S	453	SNtAGsQsQVETEA_	EQKSNTAGSQSQVETEA____
0.149748	3317800	0.294902		KAT6B	Histone acetyltransferase KAT6B	Q8WYB5-3;Q8WYB5-2;Q8WYB5	Q8WYB5-3	S	1289;1398;1581	NYTRADQsPQIATTL	SLQNYTRADQSPQIATTLDDC
0.149739	472900000	0.29493		HNRNPUL2-BSCL2;HNRNPUL2	Heterogeneous nuclear ribonucleoprotein U-like protein 2	H3BQZ7;Q1KMD3	H3BQZ7	S	161;161	EDEPEERsGDEtPGs	KREEDEPEERSGDETPGSEVP
0.149668	354580000	0.295162		NMT1	Glycylpeptide N-tetradecanoyltransferase 1	B7Z8J4;P30419	B7Z8J4	S	47;47	SYNRGGLsPANDtGA	EDNSYNRGGLSPANDTGAKKK
0.149632	4955200000	0.295279		NUCKS1	Nuclear ubiquitous casein and cyclin-dependent kinase substrate 1	Q9H1E3;Q9H1E3-2	Q9H1E3	S	130;90	APFQEKDsGsDEDFL	EDEAPFQEKDSGSDEDFLMED
0.149632	4967600000	0.295279		NUCKS1	Nuclear ubiquitous casein and cyclin-dependent kinase substrate 1	Q9H1E3;Q9H1E3-2	Q9H1E3	S	132;92	FQEKDsGsDEDFLME	EAPFQEKDSGSDEDFLMEDDD
0.149577	1565100000	0.295456		SRRM1	Serine/arginine repetitive matrix protein 1	E9PCT1;A9Z1X7;Q8IYB3;Q8IYB3-2	E9PCT1	S	764;761;752;750	RRVsssRsVsGsPEP	QSVRRVSSSRSVSGSPEPAAK
0.149577	1609700000	0.295456		SRRM1	Serine/arginine repetitive matrix protein 1	E9PCT1;A9Z1X7;Q8IYB3;Q8IYB3-2	E9PCT1	S	768;765;756;754	ssRsVsGsPEPAAKK	RVSSSRSVSGSPEPAAKKPPA
0.149489	4592000	0.295741		TOX4	TOX high mobility group box family member 4	B4DPY8;O94842;F6TTN0	B4DPY8	S	500;523;451	PERPMNNsPEAHTVE	ESSPERPMNNSPEAHTVEAPS
0.149489	4592000	0.295741		TOX4	TOX high mobility group box family member 4	B4DPY8;O94842;F6TTN0	B4DPY8	S	510;533;461	AHTVEAPsPETICEM	SPEAHTVEAPSPETICEMITD
0.149416	59433000	0.295979		SRRM2	Serine/arginine repetitive matrix protein 2	Q9UQ35;Q9UQ35-2;I3L2L6;F5GWZ7	Q9UQ35	S	1672;1672;1672;924	SRTARRGsRssPEPK	PPKSRTARRGSRSSPEPKTKS
0.149266	279060000	0.296468		ATG4B	Cysteine protease ATG4B	F8WD71;F5H7P2;Q9Y4P1;Q9Y4P1-4	F8WD71	S	309;369;383;321	RLERFFDsEDEDFEI	DVERLERFFDSEDEDFEILSL
0.149023	116540000	0.297259		SRRM2	Serine/arginine repetitive matrix protein 2	I3L4D8;I3L182;Q9UQ39;I3L1I8;Q9UQ35-3;Q9UQ35;Q9UQ35-2;I3L2L6	I3L4D8;Q9UQ35	S	250;154;215;154;154;250;250;250	KKRKRsRsttPAPKs	SKDKKRKRSRSTTPAPKSRRA
0.149023	116540000	0.297259		SRRM2	Serine/arginine repetitive matrix protein 2	I3L4D8;I3L182;Q9UQ39;I3L1I8;Q9UQ35-3;Q9UQ35;Q9UQ35-2;I3L2L6	I3L4D8;Q9UQ35	T	252;156;217;156;156;252;252;252	RKRsRsttPAPKsRR	DKKRKRSRSTTPAPKSRRAHR
0.14897	93611000	0.297431		MED1	Mediator of RNA polymerase II transcription subunit 1	Q15648	Q15648	S	1479	AEKsyQNsPssDDGI	SSIAEKSYQNSPSSDDGIRPL
0.148955	114560000	0.297479		CHCHD3	MICOS complex subunit MIC19	G3V1K1;C9JRZ6;F8WAR4;Q9NX63	G3V1K1	S	50;50;50;50	GSKsQRysGAyGAsV	SPSGSKSQRYSGAYGASVSDE
0.148855	39732000	0.297806		GMPS	GMP synthase [glutamine-hydrolyzing]	B4DUT7;F8W720;P49915	B4DUT7	T	280;232;331	SkTLNMTtsPEEKRK	KRISKTLNMTTSPEEKRKIIG
0.148837	66853000	0.297865		VPRBP	Protein VPRBP	Q9Y4B6-2;Q9Y4B6;Q9Y4B6-3;H0Y4P3	Q9Y4B6-2	S	1475;1476;1027;1047		EEGEDGEDEDSDADEEVELIL
0.148832	282500000	0.297881		PRPF4B	Serine/threonine-protein kinase PRP4 homolog	F5H2U2;Q13523;H0YDJ3	F5H2U2	S	417;431;11	RERsKDAsPINRWsP	LSRRERSKDASPINRWSPTRR
0.148832	217080000	0.297881		PRPF4B	Serine/threonine-protein kinase PRP4 homolog	F5H2U2;Q13523;H0YDJ3	F5H2U2	S	413;427;7	ILSRRERsKDAsPIN	RDDILSRRERSKDASPINRWS
0.148832	84395000	0.297881		PRPF4B	Serine/threonine-protein kinase PRP4 homolog	F5H2U2;Q13523;H0YDJ3	F5H2U2	T	425;439;19	PINRWsPtRRRsRsP	DASPINRWSPTRRRSRSPIRR
0.148729	324920	0.298217		RGPD5;RGPD8;RGPD6	RANBP2-like and GRIP domain-containing protein 5/6;RANBP2-like and GRIP domain-containing protein 8	Q99666;O14715;F8W705;Q99666-2;C9J1W9;C9JF75	Q99666	S	21;21;21;21;21;21	SVLGLtPsPRQKSMK	YVASVLGLTPSPRQKSMKGFY
0.148729	324920	0.298217		RGPD5;RGPD8;RGPD6	RANBP2-like and GRIP domain-containing protein 5/6;RANBP2-like and GRIP domain-containing protein 8	Q99666;O14715;F8W705;Q99666-2;C9J1W9;C9JF75	Q99666	T	19;19;19;19;19;19	VASVLGLtPsPRQKS	ERYVASVLGLTPSPRQKSMKG
0.148665	679050000	0.298426		HNRNPC		B4DY08;G8JL89	B4DY08	S	247;155		KMESEGGADDSAEEGDLLDDD
0.148484	149250000	0.299019		SRRM2	Serine/arginine repetitive matrix protein 2	I3L4D8;I3L182;Q9UQ39;Q9UQ35;Q9UQ35-2;I3L2L6;F5GWZ7	I3L4D8;Q9UQ35	S	790;694;755;790;790;790;42	sPCPKQKsQtPPRRs	SGSSPCPKQKSQTPPRRSRSG
0.148484	149250000	0.299019		SRRM2	Serine/arginine repetitive matrix protein 2	I3L4D8;I3L182;Q9UQ39;Q9UQ35;Q9UQ35-2;I3L2L6;F5GWZ7	I3L4D8;Q9UQ35	T	792;696;757;792;792;792;44	CPKQKsQtPPRRsRS	SSPCPKQKSQTPPRRSRSGSS
0.148454	5482500	0.299119		AKIRIN2	Akirin-2	Q53H80	Q53H80	S	39	APTSAAAsPLsAAAA	PLSAPTSAAASPLSAAAATAA
0.148425	10344000	0.299212		RPS10	40S ribosomal protein S10	P46783;F6U211	P46783	T	126;126	rGEADRDtyRRsAVP	RLTRGEADRDTYRRSAVPPGA
0.148227	12025000	0.299862		DCAF10	DDB1- and CUL4-associated factor 10	Q5QP82-2;Q5QP82	Q5QP82-2	S	92;92	PGEPsPPsPPCRRPG	ASAPGEPSPPSPPCRRPGPDC
0.148103	162010000	0.300269		DDX23	Probable ATP-dependent RNA helicase DDX23	F8W1J5;F8VVA2;Q9BUQ8	F8W1J5	S	109;109;109	DRKRssLsPGRGKDF	RDKDRKRSSLSPGRGKDFKSR
0.148089	12197000	0.300313		LYN	Tyrosine-protein kinase Lyn	P07948-2;P07948;E5RJ37	P07948-2	S	13;13;13	SKGKDsLsDDGVDLk;SKGkDsLsDDGVDLk	CIKSKGKDSLSDDGVDLKTQP
0.148017	27558000	0.300551		NAP1L4	Nucleosome assembly protein 1-like 4	Q99733;F5HFY4;E9PNJ7;E9PKT8;C9J6D1;C9JZI7;A8MZ22;E9PS34;E9PNW0;E9PJJ2;E9PKI2;C9J1B1;E9PP22	Q99733	S	12;12;12;12;12;12;12;12;12;12;12;12;12	sFsdGVPsDsVEAAk	ADHSFSDGVPSDSVEAAKNAS
0.147933	889950000	0.300827		HDGF	Hepatoma-derived growth factor	A8K8G0;Q5SZ08;P51858;Q5SZ07;B7Z525	A8K8G0	S	100;125;132;148;155	kkGNAEGssDEEGKL	DGDKKGNAEGSSDEEGKLVID
0.147933	889950000	0.300827		HDGF	Hepatoma-derived growth factor	A8K8G0;Q5SZ08;P51858;Q5SZ07;B7Z525	A8K8G0	S	101;126;133;149;156	kGNAEGssDEEGKLV	GDKKGNAEGSSDEEGKLVIDE
0.147924	476550000	0.300855		USP10	Ubiquitin carboxyl-terminal hydrolase 10	Q14694;Q14694-3;Q14694-2;H3BNA1	Q14694	S	576;580;624;88	QEEQGEGsEDEWEQV	EEEQEEQGEGSEDEWEQVGPR
0.147806	11034000	0.301244		SEC62	Translocation protein SEC62	Q99442	Q99442	T	155	EESKKEEtPGtPKKK	GEKEESKKEETPGTPKKKETK
0.147806	51456000	0.301244		SEC62	Translocation protein SEC62	Q99442	Q99442	T	158	KKEEtPGtPKKKETK	EESKKEETPGTPKKKETKKKF
0.147803	9312900	0.301253		PALLD	Palladin	Q8WX93-7;Q8WX93-4;Q8WX93-8;Q8WX93-3;Q8WX93-2;Q8WX93-9;Q8WX93-5;Q8WX93	Q8WX93-7	S	103;390;495;719;877;894;877;1101	AVNQrGRsPRsPsGH	MVQAVNQRGRSPRSPSGHPHV
0.147803	9312900	0.301253		PALLD	Palladin	Q8WX93-7;Q8WX93-4;Q8WX93-8;Q8WX93-3;Q8WX93-2;Q8WX93-9;Q8WX93-5;Q8WX93	Q8WX93-7	S	106;393;498;722;880;897;880;1104	QrGRsPRsPsGHPHV	AVNQRGRSPRSPSGHPHVRRP
0.147801	55150000	0.301259		BAZ1A	Bromodomain adjacent to zinc finger domain protein 1A	F5H239;Q9NRL2-2;Q9NRL2	F5H239	S	1065;1381;1413	RRCRKRQsPEPsPVt	ESKRRCRKRQSPEPSPVTLGR
0.147801	19456000	0.301259		BAZ1A	Bromodomain adjacent to zinc finger domain protein 1A	F5H239;Q9NRL2-2;Q9NRL2	F5H239	S	1069;1385;1417	KRQsPEPsPVtLGRR	RCRKRQSPEPSPVTLGRRSSG
0.147798	55457000	0.30127		MDC1	Mediator of DNA damage checkpoint protein 1	F8VV34;E7EVA7;Q14676-3;Q14676;E9PGY5;Q14676-2;F8W1C2;F8VZP8;F8VU38;Q14676-4	F8VV34	S	376;376;376;376;376;376;248;248;248;376	LQEsQAGsDtDVEEG	LAHLQESQAGSDTDVEEGKAP
0.147798	58885000	0.30127		MDC1	Mediator of DNA damage checkpoint protein 1	F8VV34;E7EVA7;Q14676-3;Q14676;E9PGY5;Q14676-2;F8W1C2;F8VZP8;F8VU38;Q14676-4	F8VV34	T	378;378;378;378;378;378;250;250;250;378	EsQAGsDtDVEEGKA	HLQESQAGSDTDVEEGKAPQA
0.147574	113910000	0.302006		TSSC4	Protein TSSC4	Q9Y5U2;Q9Y5U2-2;C9JJV1	Q9Y5U2	S	265;201;201	AHLAGPGsPEAEEWG	VELAHLAGPGSPEAEEWGSHH
0.147527	13572000	0.302164		MPHOSPH10	U3 small nucleolar ribonucleoprotein protein MPP10	C9JX83;O00566	C9JX83	S	135;275	DFFDPVEsDEDITNV	KYKDFFDPVESDEDITNVHDD
0.147527	13572000	0.302164		MPHOSPH10	U3 small nucleolar ribonucleoprotein protein MPP10	C9JX83;O00566	C9JX83	S	149;289	VHDDELDsNKEDDEI	ITNVHDDELDSNKEDDEIAEE
0.147451	17294000	0.302412		MTDH	Protein LYRIC	E5RJU9;Q86UE4;H0YBJ8	E5RJU9	S	370;426;96	IPDDQKVsDDDKEKG	QEPIPDDQKVSDDDKEKGEGA
0.14738	522660	0.302648		SCRIB	Protein scribble homolog	Q14160-2;Q14160;Q14160-3;H0YCG0;E7EMI2	Q14160-2	S	1195;1276;1276;272;645	RALAAVPsAGsVQRV	LDYRALAAVPSAGSVQRVPSG
0.147292	924590	0.302938		TUBB	Tubulin beta chain	Q5JP53;P07437;F8VYX6;F8VW92;F8VUJ7;E9PBJ4	Q5JP53	T	37;55;55;55;55;55	sVyyNEAtGGkyVPR	DRISVYYNEATGGKYVPRAIL
0.147212	26243000	0.303202		KMT2A;MLL	Histone-lysine N-methyltransferase 2A;MLL cleavage product N320;MLL cleavage product C180	Q03164-2;Q03164;E9PQG7;E9PR05;Q9Y6P1	Q03164-2	S	351;351;351;384;384		TKEDKTVVRQSPRRIKPVRII
0.147191	7963100	0.303271		RBM15	Putative RNA-binding protein 15	Q96T37-2;Q96T37-3;Q96T37	Q96T37-2	S	127;127;127	SSRLHsyssPstKNs	GSSSSRLHSYSSPSTKNSSGG
0.147165	35747000	0.303356		MCRS1	Microspherule protein 1	F8W126;Q7Z372;Q96EZ8-3;Q96EZ8;Q96EZ8-2	F8W126	S	269;91;269;282;295	GDQVLNFsDAEDLID	LPKGDQVLNFSDAEDLIDDSK
0.147165	3387900	0.303356		ZNF318	Zinc finger protein 318	Q5VUA4-2;Q5VUA4	Q5VUA4-2	S	59;59	tPARRPRsPsGHRGR	SSRTPARRPRSPSGHRGRRAS
0.147165	3387900	0.303356		ZNF318	Zinc finger protein 318	Q5VUA4-2;Q5VUA4	Q5VUA4-2	S	61;61	ARRPRsPsGHRGRRA	RTPARRPRSPSGHRGRRASPS
0.14712	1466900	0.303505		KIAA1468	LisH domain and HEAT repeat-containing protein KIAA1468	Q9P260;Q9P260-2	Q9P260	S	141;141	PGNFERQsGtPPGMG	FSNPGNFERQSGTPPGMGAPG
0.14712	1466900	0.303505		KIAA1468	LisH domain and HEAT repeat-containing protein KIAA1468	Q9P260;Q9P260-2	Q9P260	T	143;143	NFERQsGtPPGMGAP	NPGNFERQSGTPPGMGAPGVP
0.14711	9928300	0.303539		MLLT4	Afadin	C9JX92;A8MQ02;P55196-3;P55196;P55196-5;C9IYT9;Q5TIG5;P55196-2;P55196-6;P55196-1	C9JX92	S	1301;1318;1301;1318;1317;1318;1318;1302;1318;1301		QSSSLDSSTSSQEHLNHSSKS
0.147076	226040000	0.303653		LMNA	Prelamin-A/C;Lamin-A/C	Q5TCJ4;Q3BDU5;P02545-2;Q6UYC3;P02545-3;P02545;Q5TCI8;D6RAQ3;E7EUI9	Q5TCJ4	S	390;390;390;390;390;390;309;291;278	EEERLRLsPsPTsQR;EEERLRLsPsPtsQR	LEGEEERLRLSPSPTSQRSRG
0.147076	353430000	0.303653		LMNA	Prelamin-A/C;Lamin-A/C	Q5TCJ4;Q3BDU5;P02545-2;Q6UYC3;P02545-3;P02545;Q5TCI8;D6RAQ3;E7EUI9	Q5TCJ4	S	392;392;392;392;392;392;311;293;280	ERLRLsPsPTsQRsR;ERLRLsPsPtsQRsR	GEEERLRLSPSPTSQRSRGRA
0.147024	291130000	0.303823		EDC3	Enhancer of mRNA-decapping protein 3	H3BQ37;H3BPW9;Q96F86;H3BTD6	H3BQ37	S	131;131;131;18	KsQDVAVsPQQQQCs	TDVKSQDVAVSPQQQQCSKSY
0.147012	968370	0.303864		SCML1	Sex comb on midleg-like protein 1	Q5H966;Q9UN30-1;Q9UN30-2;Q9UN30	Q5H966	S	111;17;111;138	FSYPEsYsPtLPVsR	YETFSYPESYSPTLPVSRREN
0.146917	267970000	0.304177		LBR	Lamin-B receptor	Q14739;C9JXK0	Q14739	S	99;99	KsARRsAsAsHQADI	RPPKSARRSASASHQADIKEA
0.146657	1934000000	0.305039		ZRANB2	Zinc finger Ran-binding domain-containing protein 2	O95218-2;O95218	O95218-2	S	153;153	KEVEDKEsEGEEEDE	SILKEVEDKESEGEEEDEDED
0.146657	12872000	0.305039		ZRANB2	Zinc finger Ran-binding domain-containing protein 2	O95218-2;O95218	O95218-2	S	165;165	EDEDEDLsKYKLDED	GEEEDEDEDLSKYKLDEDEDE
0.146575	19479000	0.305311		ATAD2B	ATPase family AAA domain-containing protein 2B	Q9ULI0-2;Q9ULI0	Q9ULI0-2	S	720;720	ETLILEDsEDENALS	EDIETLILEDSEDENALSIFE
0.146533	15322000	0.305451		ARHGAP39	Rho GTPase-activating protein 39	Q9C0H5;Q9C0H5-2	Q9C0H5	S	604;604	GPVVRAFsEDEALAQ	PMPGPVVRAFSEDEALAQQEN
0.146484	195110000	0.305614		RABEP1	Rab GTPase-binding effector protein 1	I3L456;F5GZU7;F5H355;Q15276-2;Q15276	I3L456	S	94;400;364;407;407	DGLRRAQstDsLGts	MFKDGLRRAQSTDSLGTSGSL
0.146484	195110000	0.305614		RABEP1	Rab GTPase-binding effector protein 1	I3L456;F5GZU7;F5H355;Q15276-2;Q15276	I3L456	S	97;403;367;410;410	RRAQstDsLGtsGsL	DGLRRAQSTDSLGTSGSLQSK
0.146389	56271000	0.305929		FUS	RNA-binding protein FUS	P35637-2;P35637;B4DR70	P35637-2	S	276;277;206	DQGsRHDsEQDNSDN	GPRDQGSRHDSEQDNSDNNTI
0.146375	174520000	0.305977		BAG6	Large proline-rich protein BAG6	B0UX83;G3V1Z5;P46379-2;P46379;P46379-3;F8VX53;F8VXY4;H0Y710	B0UX83	S	958;994;958;964;994;958;958;107	VQGAERAsPEPQREN	PMEVQGAERASPEPQRENASP
0.146168	20638000	0.306665		ZNF830	Zinc finger protein 830	Q96NB3	Q96NB3	S	351	KEEENADsDDEGELQ	LQKKEEENADSDDEGELQDLL
0.146029	33275000	0.307125		CDK11B;CDK11A	Cyclin-dependent kinase 11B;Cyclin-dependent kinase 11A	P21127-9;P21127-2;P21127;P21127-6;P21127-8;P21127-3;P21127-5;P21127-10;P21127-12;P21127-4;Q9UQ88-8;Q5QPR4;Q5QPR3;Q9UQ88-4;Q9UQ88-3;Q9UQ88-2;Q9UQ88;Q9UQ88-10;Q9UQ88-5	P21127-9;Q5QPR4	S	705;739;752;695;729;738;483;522;396;418;124;703;736;727;736;737;740;396;354	QRVKRGtsPRPPEGG	SEQQRVKRGTSPRPPEGGLGY
0.146029	33275000	0.307125		CDK11B;CDK11A	Cyclin-dependent kinase 11B;Cyclin-dependent kinase 11A	P21127-9;P21127-2;P21127;P21127-6;P21127-8;P21127-3;P21127-5;P21127-10;P21127-12;P21127-4;Q9UQ88-8;Q5QPR4;Q5QPR3;Q9UQ88-4;Q9UQ88-3;Q9UQ88-2;Q9UQ88;Q9UQ88-10;Q9UQ88-5	P21127-9;Q5QPR4	T	704;738;751;694;728;737;482;521;395;417;123;702;735;726;735;736;739;395;353	QQRVKRGtsPRPPEG	KSEQQRVKRGTSPRPPEGGLG
0.146001	6579000	0.307221		OTUD4	OTU domain-containing protein 4	G3V0I6;Q01804-3;Q01804	G3V0I6	S	546;480;545	DKyATVssPsKSKKL	ITDDKYATVSSPSKSKKLECP
0.145915	56817000	0.307507		INCENP	Inner centromere protein	Q9NQS7-2;Q9NQS7	Q9NQS7-2	S	481;481	PRsKtPssPCPAskV	LQPPRSKTPSSPCPASKVVRP
0.145832	249190000	0.307784		EPB41L3	Band 4.1-like protein 3;Band 4.1-like protein 3, N-terminally processed	Q9Y2J2-3;Q9Y2J2-2;F5GX05;A8K968;Q9Y2J2;E7EUF8;F5H7W5	Q9Y2J2-3	T	580;580;592;471;761;33;33	EWEKRLstsPVRLAA	VTNEWEKRLSTSPVRLAARQE
0.145601	1963500	0.308554		AAAS	Aladin	F8VZ44;Q9NRG9-2;Q9NRG9	F8VZ44	S	371;462;495	NAQFPRFsPVLGRAQ	YFVNAQFPRFSPVLGRAQEPP
0.14558	4051400	0.308624		IQSEC1	IQ motif and SEC7 domain-containing protein 1	H7C107;E9PG60;C9JMG9;Q6DN90;Q6DN90-2	H7C107	S	314;299;299;313;191		VTLYIDEEELSPPLPLSQAGD
0.145494	20464000	0.308911		HDAC6	Histone deacetylase 6	Q9UBN7;C9JEF4;C9J172;E9PEH1;E7EP63;E7ER52;A6NDI8;E7EPS2;E7ERH6	Q9UBN7	S	22;22;22;22;22;22;22;22;22	RsRQNPQsPPQDSsV	RQRRSRQNPQSPPQDSSVTSK
0.145482	14865000	0.308953		PGRMC2	Membrane-associated progesterone receptor component 2	O15173	O15173	S	104	RMKKRDFsLEQLRQY	SLPRMKKRDFSLEQLRQYDGS
0.145334	3713100	0.309448		FAM89A	Protein FAM89A	Q96GI7	Q96GI7	S	129		QEYKGACQAASSPDCTYALEN
0.145332	41183000	0.309454		U2AF2	Splicing factor U2AF 65 kDa subunit	P26368-2;P26368	P26368-2	S	2;2	______MsDFDEFER	_________MSDFDEFERQLN
0.145156	12638000	0.310045		USP42	Ubiquitin carboxyl-terminal hydrolase 42	C9JPC9;Q9H9J4-2;Q9H9J4	C9JPC9	S	600;754;754	DAEPQPGsPAAEsLE	EDRDAEPQPGSPAAESLEEPD
0.14515	9935400	0.310064		ALKBH5	RNA demethylase ALKBH5	F5H6G2;Q6P6C2-2	F5H6G2	S	364;375		ENYWRKSYESSEDCSEAAGSP
0.14515	82451000	0.310064		ALKBH5	RNA demethylase ALKBH5	F5H6G2;Q6P6C2-2	F5H6G2	S	373;384	DCSEAAGsPARKVKM	SSEDCSEAAGSPARKVKMRRH
0.145113	13105000	0.310189		RRP1B	Ribosomal RNA processing protein 1 homolog B	Q14684-2;Q14684	Q14684-2	S	495;513	HPQGPRGsPtGGAQL	SGSHPQGPRGSPTGGAQLLKR
0.145075	2477500	0.310317		PPP1R35	Protein phosphatase 1 regulatory subunit 35	Q8TAP8	Q8TAP8	S	87	RFRLtPPsPVRsEPQ	RQVRFRLTPPSPVRSEPQPAV
0.145031	4010300	0.310464		SERBP1	Plasminogen activator inhibitor 1 RNA-binding protein	Q8NC51-3;Q8NC51;Q8NC51-4;Q8NC51-2	Q8NC51-3;Q8NC51-4	S	25;25;25;25	DQLFDDEsDPFEVLk	NRFDQLFDDESDPFEVLKAAE
0.145019	33085000	0.310506		CCT2	T-complex protein 1 subunit beta	F8VQ14;F5GWF6;P78371;P78371-2	F8VQ14	T	261;261;261;214	sRVRVDstAkVAEIE	IFGSRVRVDSTAKVAEIEHAE
0.144927	42248000	0.310813		RBM12B	RNA-binding protein 12B	Q8IXT5;B9ZVT1	Q8IXT5	S	501;501	KMQARsQsRERGDHS	SSEKMQARSQSRERGDHSHLF
0.144927	42248000	0.310813		RBM12B	RNA-binding protein 12B	Q8IXT5;B9ZVT1	Q8IXT5	S	508;508		RSQSRERGDHSHLFDSKDPPI
0.144836	4144300	0.311117		CIC		I3L2J0	I3L2J0	S	768		PSTPAGFRAVSPAVPFSRSRQ
0.144561	37223000	0.312044		USP8	Ubiquitin carboxyl-terminal hydrolase 8	B4DKA8;P40818	B4DKA8	S	610;716	EPsKLKRsyssPDIt	RDREPSKLKRSYSSPDITQAI
0.144554	4316300	0.312067		TCF20	Transcription factor 20	Q9UGU0-2;Q9UGU0	Q9UGU0-2	S	161;161		HYQQDYTGPFSPGSAQYQQQA
0.144327	16507000	0.312832		VCPIP1	Deubiquitinating protein VCIP135	Q96JH7	Q96JH7	S	749		QKGQPRTVSPSTIRDGPSSAP
0.14414	19509000	0.313463		XRCC6	X-ray repair cross-complementing protein 6	B1AHC8;P12956;B1AHC7	B1AHC8	S	2;2;2	______MsGWEsyyK	_________MSGWESYYKTEG
0.14391	13602000	0.314239		DACH1	Dachshund homolog 1	A6NJF5;Q9UI36-2;Q9UI36	A6NJF5	S	493;439;491	IKERVPDsPsPAPsL	TSVIKERVPDSPSPAPSLEEG
0.14391	32705000	0.314239		DACH1	Dachshund homolog 1	A6NJF5;Q9UI36-2;Q9UI36	A6NJF5	S	495;441;493	ERVPDsPsPAPsLEE	VIKERVPDSPSPAPSLEEGRR
0.14391	32705000	0.314239		DACH1	Dachshund homolog 1	A6NJF5;Q9UI36-2;Q9UI36	A6NJF5	S	499;445;497	DsPsPAPsLEEGRRP	RVPDSPSPAPSLEEGRRPGSH
0.143848	22253000	0.314449		RRBP1	Ribosome-binding protein 1	Q9P2E9-2;Q9P2E9	Q9P2E9-2	S	533;533	QGKKAERsPNQGKKG	EGAQGKKAERSPNQGKKGEGA
0.143717	9642400	0.314895		MKI67	Antigen KI-67	F5H4V4;P46013;P46013-2	F5H4V4	S	2707;2708;2348	ATKIPCEsPPLEVVD	AGKATKIPCESPPLEVVDTTA
0.143621	14797000	0.315218		QSOX2	Sulfhydryl oxidase 2	Q6ZRP7	Q6ZRP7	S	578	YSADQGDssEGGTLA	LDTYSADQGDSSEGGTLARGE
0.143595	4273800	0.315308		RNPS1	RNA-binding protein with serine-rich domain 1	H3BUL0;H3BMM9;H3BTC0;Q15287;H3BTV0;H3BNI3;H3BP82;H3BTR6;H3BUG0;H3BTY0;H3BNU7;H3BV80;H3BRK4	H3BUL0	S	4;4;4;4;4;4;4;4;4;4;4;4;4	____MDLsGVKKKsL	_______MDLSGVKKKSLLGV
0.143464	47477000	0.315751		CHTOP	Chromatin target of PRMT1 protein	Q9Y3Y2-4;Q9Y3Y2;Q9Y3Y2-3	Q9Y3Y2-4	T	196;242;243	LDAYMAQtDPETND_	DAELDAYMAQTDPETND____
0.14346	2286100000	0.315764		SRRM1	Serine/arginine repetitive matrix protein 1	E9PCT1;A9Z1X7;Q8IYB3;Q8IYB3-2	E9PCT1	S	638;635;626;624	PPPKRRAsPsPPPKR	SPPPPPKRRASPSPPPKRRVS
0.14346	2286100000	0.315764		SRRM1	Serine/arginine repetitive matrix protein 1	E9PCT1;A9Z1X7;Q8IYB3;Q8IYB3-2	E9PCT1	S	640;637;628;626	PKRRAsPsPPPKRRV	PPPPKRRASPSPPPKRRVSHS
0.143425	5242800	0.315884		TNKS1BP1	182 kDa tankyrase-1-binding protein	Q9C0C2;Q9C0C2-2	Q9C0C2	S	836;287	AQLGtQRsQEADVQD	GKPAQLGTQRSQEADVQDWEF
0.143391	5981300	0.316001		RB1	Retinoblastoma-associated protein	F5H6G1;P06400	F5H6G1	S	774;795	sPyKFPssPLrIPGG	IPRSPYKFPSSPLRIPGGNIY
0.143355	5174000	0.316121		ATP6V0A2	V-type proton ATPase 116 kDa subunit a isoform 2	Q9Y487	Q9Y487	S	695	yTLIRKDsEEEVsLL	RSGYTLIRKDSEEEVSLLGSQ
0.143355	1676200	0.316121		ATP6V0A2	V-type proton ATPase 116 kDa subunit a isoform 2	Q9Y487	Q9Y487	S	700	KDsEEEVsLLGsQDI	LIRKDSEEEVSLLGSQDIEEG
0.143354	4581100	0.316124		CCNT2	Cyclin-T2	B4DH21;O60583-2;O60583	B4DH21	S	305;480;480	ASsSsVtsPIKMkIP	SQAASSSSVTSPIKMKIPIAN
0.14327	11151000	0.316409		FNDC3A	Fibronectin type-III domain-containing protein 3A	G5E9X3;Q9Y2H6-2;Q9Y2H6	G5E9X3	S	203;147;203	TQKDKMssPPssPQK	RQGTQKDKMSSPPSSPQKCPS
0.14327	11151000	0.316409		FNDC3A	Fibronectin type-III domain-containing protein 3A	G5E9X3;Q9Y2H6-2;Q9Y2H6	G5E9X3	S	206;150;206	DKMssPPssPQKCPs	TQKDKMSSPPSSPQKCPSPIN
0.143221	216260000	0.316577		POGZ	Pogo transposable element with ZNF domain	F5H8H4;Q7Z3K3-5;E9PM80;Q7Z3K3-2;Q7Z3K3-3;B7ZBY5;Q7Z3K3	F5H8H4	S	726;1269;1302;1311;1320;1355;1364	LKLsGEHsEsstPRP	EEQLKLSGEHSESSTPRPRSS
0.14319	2118400	0.316681		SNW1	SNW domain-containing protein 1	E9PGQ7;G3V3A4;Q13573;G3V4X8	E9PGQ7	S	234;234;234;72	APVMHsPsRKMTVKE	SPPAPVMHSPSRKMTVKEQQE
0.143008	75951000	0.317301		TCF20	Transcription factor 20	Q9UGU0-2;Q9UGU0	Q9UGU0-2	S	574;574	EPPRLNAsPAAREEA	AQNEPPRLNASPAAREEATSP
0.143005	17033000	0.317311		WAC	WW domain-containing adapter protein with coiled-coil	Q9BTA9-5;Q9BTA9-2;Q9BTA9	Q9BTA9-5	S	333;391;436		LSTQAQPSNQSPMSLTSDASS
0.142899	41900000	0.317674		CCT2	T-complex protein 1 subunit beta	F8VQ14;F5GWF6;P78371;P78371-2	F8VQ14	S	260;260;260;213	GsRVRVDstAkVAEI	KIFGSRVRVDSTAKVAEIEHA
0.142725	73047000	0.318266		CTNND1	Catenin delta-1	E9PIE5;C9JZR2;F8WA43;O60716-8;O60716-7;O60716-5;O60716-3;O60716-6;O60716-4;O60716-2;O60716;O60716-24;O60716-23;O60716-21;O60716-19;O60716-22;O60716-20;O60716-16;O60716-18;O60716-15;O60716-17;O60716-13;O60716-11;O60716-14;O60716-12;O60716-10;O60716-9;E9PRE2	E9PIE5	S	288;288;288;288;288;288;288;288;288;288;288;187;187;187;187;187;187;234;187;234;187;234;234;234;234;234;234;210	GLEDDQRsMGyDDLD	EPYGLEDDQRSMGYDDLDYGM
0.142667	7094600000	0.318464		CANX	Calnexin	B4E2T8;P27824	B4E2T8	S	456;564	EEDGGtVsQEEEDRK	SDAEEDGGTVSQEEEDRKPKA
0.14246	136770000	0.319171		SRRM2	Serine/arginine repetitive matrix protein 2	Q9UQ35;Q9UQ35-2;I3L2L6;F5GWZ7	Q9UQ35	S	1866;1866;1866;1118	APWKRsRsRAsPAtH	TSPAPWKRSRSRASPATHRRS
0.14246	139850000	0.319171		SRRM2	Serine/arginine repetitive matrix protein 2	Q9UQ35;Q9UQ35-2;I3L2L6;F5GWZ7	Q9UQ35	S	1869;1869;1869;1121	KRsRsRAsPAtHRRs	APWKRSRSRASPATHRRSRSR
0.14246	126410000	0.319171		SRRM2	Serine/arginine repetitive matrix protein 2	Q9UQ35;Q9UQ35-2;I3L2L6;F5GWZ7	Q9UQ35	S	1864;1864;1864;1116	sPAPWKRsRsRAsPA	SRTSPAPWKRSRSRASPATHR
0.142456	25123000	0.319184		SCRIB	Protein scribble homolog	Q14160-2;Q14160;Q14160-3	Q14160-2	S	423;504;504	PCQPDSGsPLPAEEE	EACPCQPDSGSPLPAEEEKRL
0.142348	392400000	0.319553		RIOK2	Serine/threonine-protein kinase RIO2	Q9BVS4;D6RDI3	Q9BVS4	S	337;337	EGsEFsFsDGEVAEK	ETKEGSEFSFSDGEVAEKAEV
0.142302	253690000	0.319712		SRRM2	Serine/arginine repetitive matrix protein 2	Q9UQ35;F5GWZ7	Q9UQ35	S	2067;1319	RtARGKRsLtRsPPA	RTPRTARGKRSLTRSPPAIRR
0.142302	253690000	0.319712		SRRM2	Serine/arginine repetitive matrix protein 2	Q9UQ35;F5GWZ7	Q9UQ35	S	2071;1323	GKRsLtRsPPAIRRR	TARGKRSLTRSPPAIRRRSAS
0.142302	228820000	0.319712		SRRM2	Serine/arginine repetitive matrix protein 2	Q9UQ35;F5GWZ7	Q9UQ35	T	2069;1321	ARGKRsLtRsPPAIR	PRTARGKRSLTRSPPAIRRRS
0.142256	60974000	0.319869		ZNF622	Zinc finger protein 622	Q969S3	Q969S3	S	143	IKAQPSMsPKKAPPA	QQAIKAQPSMSPKKAPPAPAK
0.142235	13847000	0.319941		RANBP2;RGPD3;RGPD4;RGPD1;RGPD2	E3 SUMO-protein ligase RanBP2;RanBP2-like and GRIP domain-containing protein 3;RanBP2-like and GRIP domain-containing protein 4;RANBP2-like and GRIP domain-containing protein 1;RANBP2-like and GRIP domain-containing protein 2	P49792;E9PGT0;A6NKT7;Q7Z3J3;F8VYC4;P0DJD0;P0DJD1;E7ES93;B4DTM4	P49792	T	2293;1317;1318;1318;1310;1302;1310;221;221	QSGtsVGtDEEsDVt;QSGtsVGtDEEsDVT	KLNQSGTSVGTDEESDVTQEE
0.142153	12355000	0.320222		DOCK1	Dedicator of cytokinesis protein 1	Q14185	Q14185	S	1681	PKKMHSRsQDKLDKD	PLLPKKMHSRSQDKLDKDDLE
0.142142	107900000	0.320258		FAM120A	Constitutive coactivator of PPAR-gamma-like protein 1	H7C0T0;Q9NZB2-2;Q9NZB2-5;Q9NZB2-4;Q9NZB2;Q9NZB2-6	H7C0T0	S	287;444;444;444;444;444	INPAQsGsPNHVDSA	SSPINPAQSGSPNHVDSAYFP
0.141901	5445600	0.321085		CHAMP1	Chromosome alignment-maintaining phosphoprotein 1	Q96JM3	Q96JM3	S	382	VsPssWKsPPAsPEs	SSSVSPSSWKSPPASPESWKS
0.141901	5445600	0.321085		CHAMP1	Chromosome alignment-maintaining phosphoprotein 1	Q96JM3	Q96JM3	S	389	sPPAsPEsWKsGPPE	SWKSPPASPESWKSGPPELRK
0.141867	291860000	0.321202		SRRM2	Serine/arginine repetitive matrix protein 2	Q9UQ35;Q9UQ35-2;I3L2L6;F5GWZ7	Q9UQ35	S	1674;1674;1674;926	TARRGsRssPEPKtK	KSRTARRGSRSSPEPKTKSRT
0.141846	322600000	0.321274		NASP	Nuclear autoantigenic sperm protein	B4DS57;F5H3J2;P49321;P49321-3	B4DS57	S	321;357;421;423	VRAkLVPsQEEtkLs	EEKVRAKLVPSQEETKLSVEE
0.14176	1991900	0.321569		FAM102B	Protein FAM102B	C9J8E5;Q5T8I3-2;Q5T8I3	C9J8E5	S	320;320;320	SQDFSLDssAEEEGL	ILQSQDFSLDSSAEEEGLRLF
0.14176	1991900	0.321569		FAM102B	Protein FAM102B	C9J8E5;Q5T8I3-2;Q5T8I3	C9J8E5	S	321;321;321	QDFSLDssAEEEGLR	LQSQDFSLDSSAEEEGLRLFV
0.141602	3260600	0.322113		CLK1	Dual specificity protein kinase CLK1	F8WBF5;E9PH13;P49759;P49759-3;P49759-2	F8WBF5	S	36;36;36;78;36	KRRKRsHssAQENKR	SSHKRRKRSHSSAQENKRCKY
0.141596	5597700	0.322133		TRAPPC12	Trafficking protein particle complex subunit 12	H7C2F7;E7ENL7;Q8WVT3	H7C2F7	S	109;259;276	QAAAPPAsPEPFAHI	RGPQAAAPPASPEPFAHIQAV
0.141586	702050000	0.322165		MARCKS	Myristoylated alanine-rich C-kinase substrate	P29966	P29966	S	27	GEAAVAssPskANGQ	ERPGEAAVASSPSKANGQENG
0.141543	81576000	0.322313		SATB2	DNA-binding protein SATB;DNA-binding protein SATB2	F8WCV6;C9JR56;Q3ZB87;Q9UPW6	F8WCV6	S	20;20;20;20	sPDRRsGsPDVKGPP	LRDSPDRRSGSPDVKGPPPVK
0.141468	1395600	0.322572		DTX3L	E3 ubiquitin-protein ligase DTX3L	Q8TDB6-2;Q8TDB6	Q8TDB6-2	S	9;9	ASHLRPPsPLLVRVy	__MASHLRPPSPLLVRVYKSG
0.141376	105120000	0.322887		USP9X	Probable ubiquitin carboxyl-terminal hydrolase FAF-X	Q93008-1;Q93008	Q93008-1	S	1600;1600	sDVDDDMsGDEKQDN	GTGSDVDDDMSGDEKQDNESN
0.141225	20451000	0.32341		VPS51	Vacuolar protein sorting-associated protein 51 homolog	Q9UID3;H0YCB7;H0YEE1;Q9UID3-2	Q9UID3	S	652;26;150;528	KRTFsVysssRQQGR	DSSKRTFSVYSSSRQQGRYAP
0.141223	978490	0.323416		SSBP4	Single-stranded DNA-binding protein 4	Q9BWW5;Q9BWG4	Q9BWW5	S	319;341	DMDGLPKssPGAVAG	GSGDMDGLPKSSPGAVAGLSN
0.141223	978490	0.323416		SSBP4	Single-stranded DNA-binding protein 4	Q9BWW5;Q9BWG4	Q9BWW5	S	320;342	MDGLPKssPGAVAGL	SGDMDGLPKSSPGAVAGLSNA
0.141064	80009000	0.323966		RAVER1	Ribonucleoprotein PTB-binding 1	Q8IY67-2;E9PAU2	Q8IY67-2	S	711;728	LLPsPEPsPEGSYVG	FAHLLPSPEPSPEGSYVGQHS
0.140908	62386000	0.324502		HDAC3	Histone deacetylase 3	O15379;O15379-2	O15379	S	424;425	DHDNDKEsDVEI___	YDGDHDNDKESDVEI______
0.140899	28296000	0.324535		KHDRBS1	KH domain-containing, RNA-binding, signal transduction-associated protein 1	Q07666-3;Q07666;E7ET98;Q07666-2	Q07666-3	S	18;18;18;18	MsRssGRsGsMDPSG	AARMSRSSGRSGSMDPSGAHP
0.140718	26108000	0.325158		AFAP1	Actin filament-associated protein 1	Q8N556;E9PDT7	Q8N556	S	665;749	EPKsGtssPQsPVFR	LAIEPKSGTSSPQSPVFRHRT
0.140601	1114600	0.325564		IBTK	Inhibitor of Bruton tyrosine kinase	E9PDR5;E7EPI0;Q9P2D0-2;Q9P2D0	E9PDR5	S	844;1030;1045;1045	GsPRDLQsPDFtTGF	AGVGSPRDLQSPDFTTGFHSD
0.140478	3180900	0.32599		INTS4	Integrator complex subunit 4	Q2T9F4;Q96HW7-3;Q96HW7	Q2T9F4	S	390;452;600	KLVSSAVsPSIIPQE	PGRKLVSSAVSPSIIPQEDPS
0.140437	87354000	0.326132		SGPP1	Sphingosine-1-phosphate phosphatase 1	Q9BX95	Q9BX95	S	112	AGALRRNsLtGEEGQ	PRRAGALRRNSLTGEEGQLAR
0.140248	23188000	0.326787		SLC38A2	Sodium-coupled neutral amino acid transporter 2	F8VUY8;Q96QD8	F8VUY8	S	19;19	sPDEDsssyssNsDF	FSISPDEDSSSYSSNSDFNYS
0.140174	24816000	0.327045		POGZ	Pogo transposable element with ZNF domain	F5H8H4;Q7Z3K3-5;E9PM80;Q7Z3K3-2;Q7Z3K3-3;B7ZBY5;Q7Z3K3	F5H8H4	S	311;854;887;896;905;940;949	VDDQDEGsPVTQEPE	CLNVDDQDEGSPVTQEPELAS
0.140145	2596900	0.327145		LIN54	Protein lin-54 homolog	Q6MZP7;Q6MZP7-5;Q6MZP7-2	Q6MZP7	S	28;28;28		DTGITLVDDDSIEAVIVSSPI
0.140145	5211000	0.327145		LIN54	Protein lin-54 homolog	Q6MZP7;Q6MZP7-5;Q6MZP7-2	Q6MZP7	S	35;35;35		DDDSIEAVIVSSPIPMETELE
0.139934	194530000	0.32788		POLD3	DNA polymerase delta subunit 3	Q15054;Q32N00;Q32MZ9;H0YD46	Q15054	S	307;201;268;31	RGkRVALsDDEtKEt	EKKRGKRVALSDDETKETENM
0.139785	159270000	0.328398		MAP1B	Microtubule-associated protein 1B;MAP1B heavy chain;MAP1 light chain LC1	P46821	P46821	S	1881	KPEEttRsPDEEDyD	AYQKPEETTRSPDEEDYDYES
0.139744	61151000	0.328541		SMC1A	Structural maintenance of chromosomes protein 1A	Q14683	Q14683	S	957	IsQEEGssQGEDsVs	MDDISQEEGSSQGEDSVSGSQ
0.139744	7769800	0.328541		SMC1A	Structural maintenance of chromosomes protein 1A	Q14683	Q14683	S	966	GEDsVsGsQRIssIy	SSQGEDSVSGSQRISSIYARE
0.139735	142360000	0.328571		TJP1	Tight junction protein ZO-1	G5E9E7;G3V1L9;Q07157-2;Q07157	G5E9E7	S	621;617;617;617	SKRNLRKsREDLsAQ	LRSSKRNLRKSREDLSAQPVQ
0.139693	19802000	0.328717		SRSF10	Serine/arginine-rich splicing factor 10	Q5JRI1;O75494-4	Q5JRI1	S	155;156	PTGRPRRsRsHsDND	RNRPTGRPRRSRSHSDNDSQV
0.139657	8915000	0.328843		FAM169A	Soluble lamin-associated protein of 75 kDa	D6RB01;Q9Y6X4	D6RB01	S	290;350	QDsEFsssQGEDEKT	KRFQDSEFSSSQGEDEKTSQT
0.139509	183360000	0.329358		CAD	CAD protein;Glutamine-dependent carbamoyl-phosphate synthase;Aspartate carbamoyltransferase;Dihydroorotase	F8VPD4;P27708	F8VPD4	S	1796;1859	PPRIhRAsDPGLPAE	FHLPPRIHRASDPGLPAEEPK
0.139256	251610000	0.330241		SRRM2	Serine/arginine repetitive matrix protein 2	Q9UQ35;Q9UQ35-2;I3L2L6;F5GWZ7	Q9UQ35	S	1675;1675;1675;927	ARRGsRssPEPKtKs	SRTARRGSRSSPEPKTKSRTP
0.139166	8637600	0.330557		MARK2	Serine/threonine-protein kinase MARK2	E7ETY4;E9PC69;Q7KZI7-10;Q7KZI7-13;Q7KZI7-7;Q7KZI7-2;Q7KZI7-15;Q7KZI7-5;Q7KZI7-16;Q7KZI7-4;Q7KZI7-9;Q7KZI7-12;Q7KZI7-14;Q7KZI7-3;Q7KZI7-6;Q7KZI7-11;Q7KZI7-8;Q7KZI7	E7ETY4	S	367;400;367;367;367;367;400;400;400;400;400;367;367;367;367;400;400;400	HKVQRsVsANPKQRR	SPSHKVQRSVSANPKQRRFSD
0.139096	35079000	0.330801		TP53	Cellular tumor antigen p53	P04637;P04637-2;P04637-3;E9PCY9;E7EMR6;E7EQX7;E9PFT5	P04637	S	9;9;9;9;9;9;9	EEPQsDPsVEPPLsQ	__MEEPQSDPSVEPPLSQETF
0.139033	21726000	0.331021		ZNF638	Zinc finger protein 638	Q14966-3;Q14966;E7EUZ3;Q14966-5	Q14966-3	S	1744;1744;684;841		VTVDEIQDDSSDLHLVTLDEV
0.138944	156340000	0.331335		CDC20	Cell division cycle protein 20 homolog	Q12834;B4E1H5	Q12834	T	55;55	RsHsAGRtPGRtPGk	AANRSHSAGRTPGRTPGKSSS
0.138944	164080000	0.331335		CDC20	Cell division cycle protein 20 homolog	Q12834;B4E1H5	Q12834	T	59;59	AGRtPGRtPGkSSSk	SHSAGRTPGRTPGKSSSKVQT
0.138808	1881600000	0.331809		PRPF40A	Pre-mRNA-processing factor 40 homolog A	E9PHJ7;F8W9L2;O75400-2;O75400-3;O75400	E9PHJ7	S	752;865;856;865;883	SKKRRHKsDsPEsDA	KKKSKKRRHKSDSPESDAERE
0.138798	914100000	0.331846		SRRM2	Serine/arginine repetitive matrix protein 2	Q9UQ35;Q9UQ35-2;I3L4U6;E7EU37	Q9UQ35	S	2690;2272;16;171	DsLRDsRsLsysPVE	KPIDSLRDSRSLSYSPVERRR
0.138599	8905500	0.332542		BET1L	BET1-like protein	H7BXT7;E9PHY4;B8ZZS0;Q9NYM9	H7BXT7	S	9;9;9;9	ADWARAQsPGAVEEI	__MADWARAQSPGAVEEILDR
0.138577	7102000	0.332622		C2orf44	WD repeat and coiled-coil-containing protein C2orf44	Q9H6R7-3;Q9H6R7	Q9H6R7-3	S	203;690	FRDsFsHsPGAVssL	SDVFRDSFSHSPGAVSSLKVF
0.138562	7524800	0.332672		KIF21A	Kinesin-like protein KIF21A	H0YI78;F5H0V8;F5H219;H0YHT2;F8W762;F8WCP6;F5H0C3;Q7Z4S6-3;Q7Z4S6-2;Q7Z4S6;Q7Z4S6-4	H0YI78	S	654;660;1636;974;1626;1674;1620;1626;1660;1673;1674	DLGEDIAsN______	DTGDLGEDIASN_________
0.138174	4628900	0.334037		UBA5	Ubiquitin-like modifier-activating enzyme 5	E7EQ61;Q9GZZ9-2;Q9GZZ9	E7EQ61	S	350;294;350		EWGIELVSEVSEEELKNFSGP
0.138173	1609300	0.33404		CTTNBP2	Cortactin-binding protein 2	H0Y448;Q8WZ74	H0Y448	S	1012;1524	DQRLSLGsDDEADLV	LNLDQRLSLGSDDEADLVKEL
0.138067	69072000	0.334413		BAIAP2L1	Brain-specific angiogenesis inhibitor 1-associated protein 2-like protein 1	Q9UHR4	Q9UHR4	T	412	TEAVtVPtPsPtPVR	ENETEAVTVPTPSPTPVRSIS
0.138034	20428000	0.33453		ZZZ3	ZZ-type zinc finger-containing protein 3	Q8IYH5-4;Q8IYH5-2;Q8IYH5	Q8IYH5-4	S	391;391;391	RAAPTRGsPTKNSSP	SPRRAAPTRGSPTKNSSPYRE
0.137758	6643200	0.335502		SYNRG	Synergin gamma	Q9UMZ2-6;Q9UMZ2-4;Q9UMZ2-3;A8MWU4;Q9UMZ2-5;Q9UMZ2	Q9UMZ2-6	S	591;674;674;674;752;752	yDVFRQLsLEGsGLG	STKYDVFRQLSLEGSGLGVED
0.137568	219930000	0.336173		MCM4	DNA replication licensing factor MCM4	P33991;E5RFR3;E5RFJ8;E7EM48	P33991	S	120;120;70;80	RQRPDLGsAQkGLQV	TPVRQRPDLGSAQKGLQVDLQ
0.13753	14498000	0.336307		MTOR	Serine/threonine-protein kinase mTOR	B1AKQ2;B1AKP8;P42345	B1AKQ2	S	110;659;2454	DsysAGQsVEILDGV	TRTDSYSAGQSVEILDGVELG
0.137519	23292000	0.336348		PTPN23	Protein-tyrosine-phosphatase;Tyrosine-protein phosphatase non-receptor type 23	B4DST5;Q9H3S7	B4DST5	S	997;1123	AADLLsssPEsQHGG	GAAAADLLSSSPESQHGGTQS
0.137424	33548000	0.336682		DPYSL2	Dihydropyrimidinase-related protein 2	Q8NAN9;B4DR31;Q16555	Q8NAN9	S	143;481;517	PKtVtPAssAktsPA	SVTPKTVTPASSAKTSPAKQQ
0.137424	33548000	0.336682		DPYSL2	Dihydropyrimidinase-related protein 2	Q8NAN9;B4DR31;Q16555	Q8NAN9	S	148;486;522	PAssAktsPAkQQAP	TVTPASSAKTSPAKQQAPPVR
0.137404	39827000	0.336753		MTDH	Protein LYRIC	E5RJU9;Q86UE4	E5RJU9	S	512;568	KsEtsWEsPKQIKKK	SQTKSETSWESPKQIKKKKKA
0.137345	113240000	0.336962		GTF3C1	General transcription factor 3C polypeptide 1	Q12789;Q12789-3;H7BYG6	Q12789	S	1068;1068;1066	NsstDQGsDEEGsLQ	VRKNSSTDQGSDEEGSLQKEQ
0.13729	8107800	0.337158		NEIL2	Endonuclease 8-like 2	E7EU31;Q969S2-4;Q969S2-3;Q969S2-2;Q969S2	E7EU31	S	212;111;166;211;227		CYTLLDQRYFSGLGNIIKNEA
0.13723	143460000	0.337371		ZC3H18	Zinc finger CCCH domain-containing protein 18	E7ERS3;Q86VM9;H3BRH3	E7ERS3	S	892;868;111	KsGGRLGsPKPERQr	RDRKSGGRLGSPKPERQRGQN
0.137182	52820000	0.337539		UNC45A	Protein unc-45 homolog A	Q9H3U1	Q9H3U1	T	15	tPEPRPAtPGAssVE	GPGTPEPRPATPGASSVEQLR
0.137121	59301000	0.337756		AKT2	RAC-beta serine/threonine-protein kinase	B3KP61;Q0VAN0;P31751	B3KP61	S	375;431;474	RTHFPQFsysAsIRE	LDQRTHFPQFSYSASIRE___
0.137121	38709000	0.337756		AKT2	RAC-beta serine/threonine-protein kinase	B3KP61;Q0VAN0;P31751	B3KP61	S	379;435;478	PQFsysAsIRE____	THFPQFSYSASIRE_______
0.137099	131540000	0.337834		RAPH1	Ras-associated and pleckstrin homology domains-containing protein 1	C9K0J5;Q70E73	C9K0J5	S	1017;965	KKTSKTSsPGGKKPP	SPGKKTSKTSSPGGKKPPPTP
0.137037	17130000	0.338053		DVL2	Segment polarity protein dishevelled homolog DVL-2	I3L2N2;O14641;I3L0M7;I3L2W9	I3L2N2	S	188;194;128;190		RLERHLAGYESSSTLMTSELE
0.136994	211130000	0.338206		INTS3	Integrator complex subunit 3	Q68E01-4;Q68E01-3;Q68E01-2;Q68E01	Q68E01-4	S	552;899;1039;1040	KGssAVGsDsD____	RKRKGSSAVGSDSD_______
0.136994	230470000	0.338206		INTS3	Integrator complex subunit 3	Q68E01-4;Q68E01-3;Q68E01-2;Q68E01	Q68E01-4	S	554;901;1041;1042	ssAVGsDsD______	RKGSSAVGSDSD_________
0.136777	20714000	0.338978		CLUAP1	Clusterin-associated protein 1	B4DFY1;Q96AJ1-2;Q96AJ1	B4DFY1	S	187;243;409	KsEPLDEsDNDF___	RVRKSEPLDESDNDF______
0.136757	17375000	0.339049		EPPK1	Epiplakin	P58107	P58107	S	2716	RGLRRQVsAsELHts	VSFRGLRRQVSASELHTSGIL
0.136693	27770000	0.339276		DNAH9	Dynein heavy chain 9, axonemal	H0Y3W2;E7EP17;Q9NYC9-2;Q9NYC9	H0Y3W2	S	1198;2616;2616;2616		LQRHFSVFVLSFPGADALSSI
0.136617	17170000	0.339547		SETX	Probable helicase senataxin	Q7Z333-3;Q7Z333;Q7Z333-4	Q7Z333-3	S	1487;1487;1487		MAALKEGEPDSSSDAEEDNLF
0.136617	17170000	0.339547		SETX	Probable helicase senataxin	Q7Z333-3;Q7Z333;Q7Z333-4	Q7Z333-3	S	1489;1489;1489		ALKEGEPDSSSDAEEDNLFLT
0.136586	3665900	0.339656		KIAA1524	Protein CIP2A	Q8TCG1-2;Q8TCG1	Q8TCG1-2	S	745;904	NPETVNLsI______	GKINPETVNLSI_________
0.136521	16975000	0.339887		BAZ1B	Tyrosine-protein kinase BAZ1B	Q9UIG0-2;Q9UIG0	Q9UIG0-2	S	312;312	TkRKNTGsPDRKPsK	NPSTKRKNTGSPDRKPSKKSK
0.13649	143750000	0.339999		FAM169A	Soluble lamin-associated protein of 75 kDa	D6RB01;Q9Y6X4	D6RB01	S	575;635	SAEKAVDsssEEIEV	FTQSAEKAVDSSSEEIEVEVP
0.136463	13802000	0.340094		ARFGEF2	Brefeldin A-inhibited guanine nucleotide-exchange protein 2	Q9Y6D5	Q9Y6D5	S	1511	DVDLDRQsLssIDkN	KHLDVDLDRQSLSSIDKNPSE
0.136463	13802000	0.340094		ARFGEF2	Brefeldin A-inhibited guanine nucleotide-exchange protein 2	Q9Y6D5	Q9Y6D5	S	1513	DLDRQsLssIDkNPs	LDVDLDRQSLSSIDKNPSERG
0.136458	93204000	0.340111		QRICH1	Glutamine-rich protein 1	Q2TAL8	Q2TAL8	S	345	NAVHVsGsPTALAAV	EAYNAVHVSGSPTALAAVKLE
0.136439	1004900	0.340179		NCOA7	Nuclear receptor coactivator 7	Q5JVL2;G8JL91;Q8NI08-2;Q8NI08	Q5JVL2	S	182;269;373;384	SREtSHGsPTVTKLs	LDSSRETSHGSPTVTKLSKEP
0.136339	66841000	0.340535		FAM134C	Protein FAM134C	B3KR75;Q86VR2	B3KR75	S	125;320	sEDLDGHsDPEEsFA	TEGSEDLDGHSDPEESFARDL
0.136208	2063600000	0.341005		PPP1R7	Protein phosphatase 1 regulatory subunit 7	C9JRC4;B5MBZ8;Q15435-3;Q15435;H7C118;C9JD73;H7C003	C9JRC4	S	24;24;24;24;33;8;5	EVDRRVEsEEsGDEE	EMMEVDRRVESEESGDEEGKK
0.136208	2135600000	0.341005		PPP1R7	Protein phosphatase 1 regulatory subunit 7	C9JRC4;B5MBZ8;Q15435-3;Q15435;H7C118;C9JD73;H7C003	C9JRC4	S	27;27;27;27;36;11;8	RRVEsEEsGDEEGKk	EVDRRVESEESGDEEGKKHSS
0.136161	129200000	0.341171		HMGN1	Non-histone chromosomal protein HMG-14	H0Y419;A6NL93;A6NEL0;P05114	H0Y419	S	79;79;105;89	ktEEsPAsDEAGEkE	GETKTEESPASDEAGEKEAKS
0.136148	19446000	0.341216		PASK	PAS domain-containing serine/threonine-protein kinase	B7Z7V7;F5GYW7;G5E9F1;Q96RG2;Q96RG2-2	B7Z7V7	S	627;657;843;843;843	YAASDREsPGHVPST	SEHYAASDRESPGHVPSTLDA
0.136086	128810000	0.341437		KCTD12	BTB/POZ domain-containing protein KCTD12	Q96CX2	Q96CX2	S	162		LGDELLPLGYSEPEQQEGASA
0.136051	26962000	0.341563		RGPD5;RGPD8;RANBP2;RGPD3;RGPD4	RANBP2-like and GRIP domain-containing protein 5/6;RANBP2-like and GRIP domain-containing protein 8;E3 SUMO-protein ligase RanBP2;RanBP2-like and GRIP domain-containing protein 3;RanBP2-like and GRIP domain-containing protein 4	Q99666;O14715;P49792;E9PGT0;A6NKT7;Q7Z3J3;C9JX22;B4DZH4	Q99666;P49792	S	1017;1017;1993;1017;1018;1018;776;776	MANKANtsGDFEKDD	YGKMANKANTSGDFEKDDDAY
0.135767	2997900000	0.342578		NUCKS1	Nuclear ubiquitous casein and cyclin-dependent kinase substrate 1	Q9H1E3;Q9H1E3-2	Q9H1E3	S	144;104	LMEDDDDsDyGssKK	EDFLMEDDDDSDYGSSKKKNK
0.135739	8239600	0.342677		PCM1	Pericentriolar material 1 protein	E7ETA6;Q15154-2;Q15154;E7EV56	E7ETA6	S	861;861;861;862	QGLAEtAsPVAVsLR	QRRQGLAETASPVAVSLRSDG
0.135739	5066200	0.342677		PCM1	Pericentriolar material 1 protein	E7ETA6;Q15154-2;Q15154;E7EV56	E7ETA6	S	866;866;866;867	tAsPVAVsLRsDGsE	LAETASPVAVSLRSDGSENLC
0.135724	160580000	0.342732		MARCKSL1	MARCKS-related protein	P49006	P49006	T	148	QEGkAAAtPEsQEPQ	GTAQEGKAAATPESQEPQAKG
0.135706	51456000	0.342797		SEC62	Translocation protein SEC62	Q99442	Q99442	T	158	KKEEtPGtPKKKETK	EESKKEETPGTPKKKETKKKF
0.135674	22392000	0.342909		MKI67	Antigen KI-67	F5H4V4;P46013;P46013-2	F5H4V4	S	1252;1253;893	TTKIPCDsPQsDPVD	AGKTTKIPCDSPQSDPVDTPT
0.135633	29145000	0.34306		PTPN14	Tyrosine-protein phosphatase non-receptor type 14	Q15678	Q15678	S	593	RHKYVsGssPDLVtR	ASHRHKYVSGSSPDLVTRKVQ
0.135633	41564000	0.34306		PTPN14	Tyrosine-protein phosphatase non-receptor type 14	Q15678	Q15678	S	594	HKYVsGssPDLVtRK	SHRHKYVSGSSPDLVTRKVQL
0.135597	12959000	0.343186		LARP1B	La-related protein 1B	H0Y9K3;D6R9W6;G3XAJ5;D6RJB0;Q659C4-4;Q659C4-9;Q659C4-2;Q659C4	H0Y9K3	S	309;340;340;293;146;340;293;340	PNsPRIGsPLsPKKN	ESAPNSPRIGSPLSPKKNSET
0.135597	12959000	0.343186		LARP1B	La-related protein 1B	H0Y9K3;D6R9W6;G3XAJ5;D6RJB0;Q659C4-4;Q659C4-9;Q659C4-2;Q659C4	H0Y9K3	S	312;343;343;296;149;343;296;343	PRIGsPLsPKKNsEt	PNSPRIGSPLSPKKNSETSIL
0.135585	13372000	0.34323		SNX17	Sorting nexin-17	B4DDM3;B4DQM7;Q15036	B4DDM3	S	122;311;336	LPsGstSsPGRGRGE	SVPLPSGSTSSPGRGRGEVRL
0.135583	29323000	0.343237		TTC33	Tetratricopeptide repeat protein 33	Q6PID6	Q6PID6	S	197	PAEVtHFsPKSIPDY	SEAPAEVTHFSPKSIPDYDFE
0.135528	27631000	0.343435		PRPF31	U4/U6 small nuclear ribonucleoprotein Prp31	E7EVX8;Q8WWY3	E7EVX8	S	433;439	sVVyGGkstIRDRss	QKQSVVYGGKSTIRDRSSGTA
0.135528	27631000	0.343435		PRPF31	U4/U6 small nuclear ribonucleoprotein Prp31	E7EVX8;Q8WWY3	E7EVX8	T	434;440	VVyGGkstIRDRssG	KQSVVYGGKSTIRDRSSGTAS
0.135224	19169000	0.344523		SMC1A	Structural maintenance of chromosomes protein 1A	Q14683	Q14683	S	358	EERMEEEsQsQGRDL	QEFEERMEEESQSQGRDLTLE
0.135224	60423000	0.344523		SMC1A	Structural maintenance of chromosomes protein 1A	Q14683	Q14683	S	360	RMEEEsQsQGRDLtL	FEERMEEESQSQGRDLTLEEN
0.135038	5114200	0.345191		PRKCA	Protein kinase C alpha type	P17252	P17252	S	651	VIANIDQsDFEGFsy	DQLVIANIDQSDFEGFSYVNP
0.134954	14907000	0.345493		TMPO	Lamina-associated polypeptide 2, isoforms beta/gamma;Thymopoietin;Thymopentin	P42167;G5E972;H0YJH7;P42167-2	P42167	S	354;314;189;245	EMFPyEAstPtGIsA	ILKEMFPYEASTPTGISASCR
0.134949	8166900	0.345514		CLSPN	Claspin	E7ESG2;Q9HAW4-2;Q9HAW4-3;Q9HAW4	E7ESG2	S	755;744;808;808	PtAGGFRsPsPGLFR	SFFPTAGGFRSPSPGLFRASL
0.134911	23088000	0.345651		KIDINS220	Kinase D-interacting substrate of 220 kDa	Q9ULH0-2;Q9ULH0-4;Q9ULH0;Q9ULH0-5	Q9ULH0-2	S	1427;1507;1526;298	LPsDEDEsGtEESDN	YQKLPSDEDESGTEESDNTPL
0.13491	1329000000	0.345654		ZRANB2	Zinc finger Ran-binding domain-containing protein 2	O95218-2	O95218-2	S	305	RKKRRtRsRsPEsQV	SGDRKKRRTRSRSPESQVIGE
0.13491	1707900000	0.345654		ZRANB2	Zinc finger Ran-binding domain-containing protein 2	O95218-2	O95218-2	S	307	KRRtRsRsPEsQVIG	DRKKRRTRSRSPESQVIGENT
0.134738	57620000	0.346272		DOCK7	Dedicator of cytokinesis protein 7	Q96N67-2;Q96N67-6;Q96N67-4;Q96N67-3;Q96N67;H0Y7L2;Q96N67-5;F8W9H6	Q96N67-2	S	1429;1429;1398;1398;1438;601;1407;168	PsGsAFGsQENLRWR	ERSPSGSAFGSQENLRWRKDM
0.134402	8117800	0.347483		ATXN2	Ataxin-2	F8WB06;F8VQP2;Q99700-4;Q99700;Q24JQ7;H0YH87;Q99700-2;F8W0B5;F8VRK6;F8VZQ7	F8WB06	S	493;493;758;758;469;679;758;82;107;37	LQDQRQNsPAGNKEN	DSRLQDQRQNSPAGNKENIKP
0.13437	13632000	0.3476		FNBP1L	Formin-binding protein 1-like	Q5T0N5-3;Q5T0N5-4;Q5T0N5-2;Q5T0N5-5;Q5T0N5	Q5T0N5-3	S	295;295;295;295;295	QHIyRtIsDGtIsAS	DYSQHIYRTISDGTISASKQE
0.134014	9732900	0.348886		UTP14A	U3 small nucleolar RNA-associated protein 14 homolog A	E9PEL7;Q9BVJ6;F8WD00;Q9BVJ6-2	E9PEL7	S	401;453;399;285	QEtKDsGsQEVLsEL	AGSQETKDSGSQEVLSELRVL
0.133914	55457000	0.349248		MDC1	Mediator of DNA damage checkpoint protein 1	F8VV34;E7EVA7;Q14676-3;Q14676;E9PGY5;Q14676-2;F8W1C2;F8VZP8;F8VU38;Q14676-4	F8VV34	S	376;376;376;376;376;376;248;248;248;376	LQEsQAGsDtDVEEG	LAHLQESQAGSDTDVEEGKAP
0.133883	524160000	0.349359		CD2BP2	CD2 antigen cytoplasmic tail-binding protein 2	O95400	O95400	S	195	KGPGQPssPQRLDRL	KGRKGPGQPSSPQRLDRLSGL
0.133837	28616000	0.349528		MAP1B	Microtubule-associated protein 1B;MAP1B heavy chain;MAP1 light chain LC1	P46821	P46821	S	1322	DKtLEVVsPsQsVtG	SPEDKTLEVVSPSQSVTGSAG
0.133837	13707000	0.349528		MAP1B	Microtubule-associated protein 1B;MAP1B heavy chain;MAP1 light chain LC1	P46821	P46821	S	1326	EVVsPsQsVtGsAGH	KTLEVVSPSQSVTGSAGHTPY
0.133837	13707000	0.349528		MAP1B	Microtubule-associated protein 1B;MAP1B heavy chain;MAP1 light chain LC1	P46821	P46821	S	1330	PsQsVtGsAGHtPyy	VVSPSQSVTGSAGHTPYYQSP
0.133814	2417400	0.349611		ACTB;ACTG1;ACTG2;POTEE;ACTA1;ACTC1;ACTA2	Actin, cytoplasmic 1;Actin, cytoplasmic 1, N-terminally processed;Actin, cytoplasmic 2;Actin, cytoplasmic 2, N-terminally processed;Actin, gamma-enteric smooth muscle;POTE ankyrin domain family member E;Actin, alpha skeletal muscle;Actin, alpha cardiac muscle 1;Actin, aortic smooth muscle	P60709;B4E335;P63261;F5H0N0;B4DW52;I3L3I4;F5GYT4;I3L4N8;Q5T8M7;F5H1C1;E9PG30;Q6S8J3;P68133;P68032;P63267;P62736;Q5T8M8;A6NL76;B4DUI8	P60709;P68133	S	234;210;234;192;206;234;153;225;201;201;192;934;236;236;235;236;146;148;191	MATAASsssLEksyE	ENEMATAASSSSLEKSYELPD
0.133663	3316000	0.350157		PDCD2L	Programmed cell death protein 2-like	Q9BRP1	Q9BRP1	S	20	RDAPVHGsPtGPGAW	LGLRDAPVHGSPTGPGAWTAS
0.133479	15483000	0.350825		ANKHD1;FLJ00246	Ankyrin repeat and KH domain-containing protein 1	D6RHC4;E9PDP5;E9PF56;Q8IWZ3-5;Q8IWZ3-3;Q8IWZ3-2;Q8IWZ3;Q8IWZ3-4;Q8IWZ2;Q8TEF1	D6RHC4	S	95;95;95;95;95;95;95;95;95;109	GGGGAsGsDEDEVsE	RTGGGGGASGSDEDEVSEVES
0.133442	52103000	0.350961		GPATCH4	G patch domain-containing protein 4	F8W895;E9PAV9;Q5T3I0;Q5T3I0-3	F8W895	S	101;135;130;135	NKDLEsCsDDDNQGs	EKPNKDLESCSDDDNQGSKSP
0.133442	31299000	0.350961		GPATCH4	G patch domain-containing protein 4	F8W895;E9PAV9;Q5T3I0;Q5T3I0-3	F8W895	S	110;144;139;144	DDNQGsKsPKILtDE	CSDDDNQGSKSPKILTDEMLL
0.133289	318090000	0.351515		ZC3H13	Zinc finger CCCH domain-containing protein 13	Q5T200-2;Q5T200;C9J4N9	Q5T200-2	S	356;356;172	PRRKRtPsPsYQRTL	SPSPRRKRTPSPSYQRTLTPP
0.133289	318090000	0.351515		ZC3H13	Zinc finger CCCH domain-containing protein 13	Q5T200-2;Q5T200;C9J4N9	Q5T200-2	T	354;354;170	PsPRRKRtPsPsYQR	RHSPSPRRKRTPSPSYQRTLT
0.133159	26757000	0.35199		ZDHHC5	Palmitoyltransferase ZDHHC5;Palmitoyltransferase	Q9C0B5-2;Q9C0B5;H0YEF4	Q9C0B5-2	S	327;380;214	AKLsRGDsLKEPtsI	SSSAKLSRGDSLKEPTSIAES
0.133005	84789000	0.35255		ZNF703	Zinc finger protein 703	Q9H7S9	Q9H7S9	S	297	AGHVAPVsPyKPGHS	LVGAGHVAPVSPYKPGHSVFP
0.133001	16220000	0.352563		TREX2	Three prime repair exonuclease 2	Q9BQ50	Q9BQ50	S	6		_____MGRAGSPLPRSSWPRM
0.132931	38203000	0.352821		EIF3B	Eukaryotic translation initiation factor 3 subunit B	B4DV79;F8W8C8;P55884;P55884-2;C9JZG1	B4DV79	S	88;164;164;164;125	EDFVDDVsEEELLGD	SDPEDFVDDVSEEELLGDVLK
0.132926	23031000	0.352838		NUP107	Nuclear pore complex protein Nup107	P57740;G3V1T4	P57740	S	37;37	KRVLLQAsQDENFGN	SAQKRVLLQASQDENFGNTTP
0.132849	1905800	0.35312		RBM38	RNA-binding protein 38	A6NG75;Q9H0Z9	A6NG75	S	114;195	DQYPYAAsPATAASF	ATYDQYPYAASPATAASFVGY
0.132711	717070000	0.353621		THRAP3	Thyroid hormone receptor-associated protein 3	Q9Y2W1	Q9Y2W1	T	918	FMFRKsstsPKWAHD	RGRFMFRKSSTSPKWAHDKFS
0.132583	10868000	0.354091		MED1	Mediator of RNA polymerase II transcription subunit 1	Q15648	Q15648	S	1463	YtPQNLDsEsESGSS	SPAYTPQNLDSESESGSSIAE
0.132403	3116200	0.354746		C12orf45	Uncharacterized protein C12orf45	Q8N5I9	Q8N5I9	S	178	GkIEVLDsPAsKKKK	GGKGKIEVLDSPASKKKK___
0.132201	8088700	0.355486		INTS3	Integrator complex subunit 3	Q68E01-4;Q68E01-3;Q68E01-2;Q68E01	Q68E01-4	S	49;330;536;537	DNAEAAFsDDEEDLN	SCYDNAEAAFSDDEEDLNSKG
0.132135	9897400	0.355727		PNN	Pinin	Q9H307;G3V5F0;G3V579	Q9H307	S	68;68;68	LrrGFsDsGGGPPAK	SLLLRRGFSDSGGGPPAKQRD
0.13213	5981400	0.355748		CTAGE5;CTAGE1	cTAGE family member 5;cTAGE family member 2	F8W9E1;G3V599;O15320-8;O15320-6;O15320-7;O15320-2;O15320-4;O15320-3;G3XAC5;O15320;O15320-5;Q96RT6	F8W9E1	S	597;1170;555;560;563;592;635;606;623;635;640;604	CSNsGRLsGPAELRs	DRFCSNSGRLSGPAELRSFNM
0.132052	20658000	0.356031		FAM120A	Constitutive coactivator of PPAR-gamma-like protein 1	H7C0T0;Q9NZB2-2;Q9NZB2-5;Q9NZB2-4;Q9NZB2;Q9NZB2-6	H7C0T0	S	285;442;442;442;442;442	sPINPAQsGsPNHVD	ERSSPINPAQSGSPNHVDSAY
0.131957	5155300	0.356381		ABCC5	Multidrug resistance-associated protein 5	C9JZL5;A5PKY6;F8WCY8;O15440-4;O15440-3;O15440-2;Q86UX3;O15440	C9JZL5	S	64;64;64;64;64;64;64;64	EGLsLDAsMHsQLRI	ARAEGLSLDASMHSQLRILDE
0.131957	5155300	0.356381		ABCC5	Multidrug resistance-associated protein 5	C9JZL5;A5PKY6;F8WCY8;O15440-4;O15440-3;O15440-2;Q86UX3;O15440	C9JZL5	S	67;67;67;67;67;67;67;67	sLDAsMHsQLRILDE	EGLSLDASMHSQLRILDEEHP
0.131826	241430000	0.356861		GTF2F1	General transcription factor IIF subunit 1	E7EUG6;P35269	E7EUG6	S	296;381	RKPsGGssRGNsRPG	KRERKPSGGSSRGNSRPGTPS
0.131755	292160000	0.357123		FLII	Protein flightless-1 homolog	E7EPM0;F5H407;Q13045	E7EPM0	S	350;436;436	RLRRRKDsAQDDQAK	RKMRLRRRKDSAQDDQAKQVL
0.131738	27170000	0.357186		SRRM2	Serine/arginine repetitive matrix protein 2	Q9UQ35;Q9UQ35-2;I3L2L6;F5GWZ7	Q9UQ35	T	1231;1231;1231;483	EQNsALPtssQDEEL	ETKEQNSALPTSSQDEELMEV
0.131736	401470000	0.357193		GBF1	Golgi-specific brefeldin A-resistance guanine nucleotide exchange factor 1	Q92538	Q92538	S	1298	APDAGAQsDsELPsY	RADAPDAGAQSDSELPSYHQN
0.131624	22408000	0.357603		PHACTR4	Phosphatase and actin regulator 4	Q8IZ21-3;H7BY99;Q8IZ21;Q8IZ21-2	Q8IZ21-3	S	498;513;514;524	REEEEKEsDsDsEGP	QCLREEEEKESDSDSEGPIQY
0.131562	3805900	0.357831		UBR2	E3 ubiquitin-protein ligase UBR2	Q8IWV8-4;Q8IWV8	Q8IWV8-4	S	1081;1081		DASTSAVLDHSPVASDMTLTA
0.131479	7133600	0.358136		PRRC2B	Protein PRRC2B	Q5JSZ5;G8JLK2;Q5JSZ9	Q5JSZ5	S	853;149;122	HTQNLRCsPLEPDFV	PGGHTQNLRCSPLEPDFVPDE
0.131439	8014400	0.358284		SPEN	Msx2-interacting protein	Q96T58	Q96T58	T	1737	YLDAKPPtPGASFSQ	QPPYLDAKPPTPGASFSQAES
0.131336	9062100	0.358663		KIF4A	Chromosome-associated kinesin KIF4A	O95239;F5H4Q9;O95239-2	O95239	S	801;103;801	KLRRRtFsLTEVRGQ	PPPKLRRRTFSLTEVRGQVSE
0.131336	9062100	0.358663		KIF4A	Chromosome-associated kinesin KIF4A	O95239;F5H4Q9;O95239-2	O95239	T	799;101;799	PPKLRRRtFsLTEVR	ENPPPKLRRRTFSLTEVRGQV
0.131253	24955000	0.358969		GNL1	Guanine nucleotide-binding protein-like 1	A2AB27;P36915	A2AB27	S	49;51	REEQtDtsDGEsVtH	RERREEQTDTSDGESVTHHIR
0.131253	24955000	0.358969		GNL1	Guanine nucleotide-binding protein-like 1	A2AB27;P36915	A2AB27	T	46;48	RERREEQtDtsDGEs	SGSRERREEQTDTSDGESVTH
0.131253	24955000	0.358969		GNL1	Guanine nucleotide-binding protein-like 1	A2AB27;P36915	A2AB27	T	48;50	RREEQtDtsDGEsVt	SRERREEQTDTSDGESVTHHI
0.131124	1110000	0.359447		SETD8	N-lysine methyltransferase SETD8	C9JKQ0;Q9NQR1-2;Q9NQR1	C9JKQ0	S	50;59;100	SKIySyMsPNKCSGM	TGQSKIYSYMSPNKCSGMRFP
0.131119	7069100	0.359464		TNIK	TRAF2 and NCK-interacting protein kinase	F5H865;Q9UKE5-6;Q9UKE5-2;Q9UKE5-4;Q9UKE5	F5H865	S	518;518;518;547;547		VEERSRLNRQSSPAMPHKVAN
0.131071	7959000	0.35964		ERC1	ELKS/Rab6-interacting/CAST family member 1	G8JLA4;F5H185;G8JLM9;G8JLD3;Q8IUD2-5;Q8IUD2-4;Q8IUD2-2;Q8IUD2-3;Q8IUD2	G8JLA4	T	35;35;35;35;35;35;35;35;35	PRLGHRRtNstGGsS	PRSPRLGHRRTNSTGGSSGSS
0.131022	9075800000	0.35982		CANX	Calnexin	B4E2T8;P27824	B4E2T8	S	446;554	kLEEKQKsDAEEDGG	GEEKLEEKQKSDAEEDGGTVS
0.131012	276870000	0.359859		HIST1H1C	Histone H1.2	P16403	P16403	T	31	AAKKAGGtPRkAsGP	KKKAAKKAGGTPRKASGPPVS
0.130869	24504000	0.360387		PIK3C2A	Phosphatidylinositol 4-phosphate 3-kinase C2 domain-containing subunit alpha	F5H5W9;B4E2G4;O00443	F5H5W9	S	338;338;338	ATVTRsQsLNIRTTQ	LSVATVTRSQSLNIRTTQLAK
0.130754	989440000	0.36081		SRRM2	Serine/arginine repetitive matrix protein 2	Q9UQ35;Q9UQ35-2;I3L4U6;E7EU37	Q9UQ35	S	2694;2276;20;175	DsRsLsysPVERRRP	SLRDSRSLSYSPVERRRPSPQ
0.130752	5830600	0.36082		ERCC6L	DNA excision repair protein ERCC-6-like	B5MDQ0;Q2NKX8	B5MDQ0	S	823;946		AKLEEEPSASSPQYACDFNLF
0.130697	49536000	0.361021		TBX2	T-box transcription factor TBX2	Q13207	Q13207	S	705	LESQRALsPGREsPK	VSGLESQRALSPGRESPK___
0.130697	49536000	0.361021		TBX2	T-box transcription factor TBX2	Q13207	Q13207	S	710	ALsPGREsPK_____	SQRALSPGRESPK________
0.130631	69663000	0.361265		ZNF740	Zinc finger protein 740	Q8NDX6	Q8NDX6	S	44	ENGERAGsPDVLRCS	KQAENGERAGSPDVLRCSSQG
0.130593	512840000	0.361406		UBTF	Nucleolar transcription factor 1	E9PKP7;P17480-2;P17480	E9PKP7	T	351;351;388	NINKkQAtsPAsKkP	KMLNINKKQATSPASKKPAQE
0.130472	282500000	0.361854		PRPF4B	Serine/threonine-protein kinase PRP4 homolog	F5H2U2;Q13523;H0YDJ3	F5H2U2	S	417;431;11	RERsKDAsPINRWsP	LSRRERSKDASPINRWSPTRR
0.130451	7200300	0.361932		SRCAP	Helicase SRCAP	Q6ZRS2-3;Q6ZRS2-2;Q6ZRS2	Q6ZRS2-3	T	2524;2620;2682	EELTEAKtPTSSPEK	RTSEELTEAKTPTSSPEKPQE
0.130415	6011000	0.362066		SLC12A2	Solute carrier family 12 member 2	G3XAL9;P55011-3;P55011	G3XAL9	S	187;187;187		TVLSEGSSLHSGGGGGSGHHQ
0.130401	143390000	0.362119		THRAP3	Thyroid hormone receptor-associated protein 3	Q9Y2W1	Q9Y2W1	T	941	IEDDEsGtENREEKD	EGEIEDDESGTENREEKDNIQ
0.130324	22252000	0.362402		ZNF148	Zinc finger protein 148	G5E9X2;Q6PJ98;Q9UQR1	G5E9X2	S	134;121;784	NRAGMTSsPDATTGQ	VNDNRAGMTSSPDATTGQTFG
0.130188	435370000	0.362908		CHAMP1	Chromosome alignment-maintaining phosphoprotein 1	Q96JM3	Q96JM3	S	651	MDIKGQEsssDQEQV	LDAMDIKGQESSSDQEQVDVE
0.130188	438590000	0.362908		CHAMP1	Chromosome alignment-maintaining phosphoprotein 1	Q96JM3	Q96JM3	S	653	IKGQEsssDQEQVDV	AMDIKGQESSSDQEQVDVESI
0.130151	880420	0.363046		SNX2	Sorting nexin-2	O60749;D6RC15	O60749	S	117;116	APRIESksMsAPVIF	TLIAPRIESKSMSAPVIFDRS
0.130151	880420	0.363046		SNX2	Sorting nexin-2	O60749;D6RC15	O60749	S	119;118	RIESksMsAPVIFDR	IAPRIESKSMSAPVIFDRSRE
0.12999	204620000	0.363642		USP16	Ubiquitin carboxyl-terminal hydrolase 16	B4DUS4;Q9Y5T5-4;Q9Y5T5-3;Q9Y5T5-2;Q9Y5T5	B4DUS4	S	44;105;400;414;415	VEDEDQDsEEEKDND	KKTVEDEDQDSEEEKDNDSYI
0.12973	293490000	0.364609		UBAP2L	Ubiquitin-associated protein 2-like	F8W726;Q14157-4;Q14157-1;Q14157-3;Q14157;Q14157-5;C9JD99;F5GY23	F8W726	S	620;602;609;609;609;609;105;105	YPssISssPQKDLTQ;yPssIsssPQkDLtQ	TRRYPSSISSSPQKDLTQAKN
0.129722	32761000	0.36464		LMO7	LIM domain only protein 7	E9PMS6;Q8WWI1-3;F8WD26;Q8WWI1-4;Q8WWI1-2;Q8WWI1;E9PMT2;E9PLH4;E9PMP7;H0Y424	E9PMS6	S	1013;1087;1421;1421;1421;1421;1136;1136;1035;1045	LPGDRNKsRsttELD	SGFLPGDRNKSRSTTELDDYS
0.129667	9614800	0.364843		PTK2	Focal adhesion kinase 1	B4DWJ1;E9PEI4;Q8N9D7;H0YB16;F5H4S3;H0YBZ1;H7BXZ9;H7BYN1;H0YBP1;E7ESA6;Q05397-6;Q05397-2;Q8IYN9;Q05397;Q05397-5	B4DWJ1	S	220;538;578;582;608;611;834;865;875;954;218;737;864;910;923	KLQPQEIsPPPtANL	EGVKLQPQEISPPPTANLDRS
0.129518	105510000	0.3654		UBXN7	UBX domain-containing protein 7	C9JAT7;F5GYB1;O94888	C9JAT7	S	126;140;288	LIDAsEDsQLEAAIR	SESLIDASEDSQLEAAIRASL
0.129374	1044600000	0.365937		TCOF1	Treacle protein	E7ETY2;Q13428-7;Q13428-3;Q13428-8;E9PHK9;Q13428-6;Q13428;Q13428-4;Q13428-2	E7ETY2;E9PHK9	S	1350;1313;1351;1274;1387;1312;1350;1386;1273	ESRKRKLsGDQPAAR;ESRkRKLsGDQPAAR	KGWESRKRKLSGDQPAARTPR
0.129338	58565000	0.366069		CCNE2	G1/S-specific cyclin-E2	E5RHN2;E5RK20;Q8WUE3;O96020-2;O96020	E5RHN2	S	21;21;21;21;21	PQPsQtEsPQEAQII	KQQPQPSQTESPQEAQIIQAK
0.129313	20301000	0.366165		NDE1	Nuclear distribution protein nudE homolog 1	Q9NXR1-2;Q9NXR1;I3L533;I3L2R9;I3L2T8	Q9NXR1-2	S	282;282;89;136;75	RNLVyDQsPNRtGGP	ASCRNLVYDQSPNRTGGPASG
0.129216	36666000	0.366524		PPP1R2	Protein phosphatase inhibitor 2	P41236;H7C416	P41236	T	89;35	DEDACsDtEAtEAMA	MGDDEDACSDTEATEAMAPDI
0.129197	5671200	0.366596		CSPG5	Chondroitin sulfate proteoglycan 5	O95196-3;O95196-2;O95196	O95196-3	S	329;467;467	TNKFRTPsELHNDNF	LRRTNKFRTPSELHNDNFSLS
0.129197	5671200	0.366596		CSPG5	Chondroitin sulfate proteoglycan 5	O95196-3;O95196-2;O95196	O95196-3	T	327;465;465		TKLRRTNKFRTPSELHNDNFS
0.129176	228300000	0.366674		THRAP3	Thyroid hormone receptor-associated protein 3	Q9Y2W1	Q9Y2W1	S	919	MFRKsstsPKWAHDk	GRFMFRKSSTSPKWAHDKFSG
0.129167	74158000	0.36671		COMMD3	COMM domain-containing protein 3	H0Y4E5;Q5T8Z0;H0Y4W0;Q9UBI1	H0Y4E5	S	83;96;97;129		GRSLPHITDVSWRLEYQIKTN
0.129167	74158000	0.36671		COMMD3	COMM domain-containing protein 3	H0Y4E5;Q5T8Z0;H0Y4W0;Q9UBI1	H0Y4E5	T	80;93;94;126	GRSLPHItDVSWRLE	GSIGRSLPHITDVSWRLEYQI
0.129105	1205700000	0.366941		HNRNPH1;HNRNPH2	Heterogeneous nuclear ribonucleoprotein H;Heterogeneous nuclear ribonucleoprotein H, N-terminally processed;Heterogeneous nuclear ribonucleoprotein H2	E9PCY7;P31943;G8JLB6;P55795;E7EQJ0;D6RAM1;H0YAQ2;D6R9T0;D6RFM3;D6RIT2;D6RIU0;D6RDU3;D6RJ04;D6RIH9;D6RBM0;E5RGH4;E5RGV0	E9PCY7	S	104;104;104;104;104;104;51;104;104;104;104;104;104;104;104;27;52	LkHtGPNsPDtANDG	DWVLKHTGPNSPDTANDGFVR
0.129033	51195000	0.367208		AHCYL1;AHCYL2	Putative adenosylhomocysteinase 2;Adenosylhomocysteinase;Putative adenosylhomocysteinase 3	O43865;C9JZV7;C9K0S0;D7UEQ7;H0Y8B3;F8W7N8;O43865-2;Q96HN2-3;D9N155;Q96HN2-2;Q96HN2	O43865	S	68;47;47;47;56;68;21;46;46;148;149	RSLSRSIsQSstdsY;RSLsRsIsQssTDsY	TGRRSLSRSISQSSTDSYSSA
0.128901	676180000	0.367704		THRAP3	Thyroid hormone receptor-associated protein 3	Q9Y2W1	Q9Y2W1	S	916	GrFMFRKsstsPKWA	RGRGRFMFRKSSTSPKWAHDK
0.128824	3516800	0.36799		ARHGEF11	Rho guanine nucleotide exchange factor 11	O15085;O15085-2;F8W8P9	O15085	S	1458;1498;874	KsLGGEssGGttPVG	ELLKSLGGESSGGTTPVGSFH
0.128824	3516800	0.36799		ARHGEF11	Rho guanine nucleotide exchange factor 11	O15085;O15085-2;F8W8P9	O15085	T	1462;1502;878	GEssGGttPVGsFHT	SLGGESSGGTTPVGSFHTEAA
0.128748	38705000	0.368275		POGZ	Pogo transposable element with ZNF domain	F5H8H4;Q7Z3K3-5;E9PM80;Q7Z3K3-2;Q7Z3K3-3;B7ZBY5;Q7Z3K3	F5H8H4	T	730;1273;1306;1315;1324;1359;1368	GEHsEsstPRPRSSP	KLSGEHSESSTPRPRSSPEET
0.128405	6694100	0.369562		PUM1	Pumilio homolog 1	Q5T1Z4;Q5T1Z8;Q14671-2;Q14671;E9PCJ0;H0YEH2;F5H3Q8	Q5T1Z4	S	227;263;227;227;227;244;227		LGVSMVEYVLSSSPGDSCLRK
0.128249	41354000	0.370146		ZC3H13	Zinc finger CCCH domain-containing protein 13	Q5T200-2;Q5T200	Q5T200-2	S	875;875	VRPQEsRsLsPsHLt	SQVVRPQESRSLSPSHLTEDR
0.128161	14981000	0.370475		RACGAP1	Rac GTPase-activating protein 1	F8W1E5;F8VRD2;Q9H0H5	F8W1E5	S	140;214;214	AVDQGNEsIVAKTTV	IGSAVDQGNESIVAKTTVTVP
0.128154	2095400	0.370504		FBRS	Probable fibrosin-1	F2Z2T6;Q9HAH7;Q9HAH7-1	F2Z2T6	S	193;281;281	sRPQLRVsPAtPKAR	LPFSRPQLRVSPATPKARAGE
0.128118	8771200	0.37064		SRRM2	Serine/arginine repetitive matrix protein 2	I3L4D8;I3L182;Q9UQ39;Q9UQ35;Q9UQ35-2;I3L2L6;F5GWZ7	I3L4D8;Q9UQ35	S	799;703;764;799;799;799;51		KSQTPPRRSRSGSSQPKAKSR
0.128115	4600900	0.370651		TOR1AIP2	Torsin-1A-interacting protein 2	Q8NFQ8	Q8NFQ8	S	150	ASDGTGAsQEPPtTD	PKEASDGTGASQEPPTTDSQE
0.128115	3414700	0.370651		TOR1AIP2	Torsin-1A-interacting protein 2	Q8NFQ8	Q8NFQ8	S	158	QEPPtTDsQEAQsPG	GASQEPPTTDSQEAQSPGHSS
0.128098	206030000	0.370716		LMNB1	Lamin-B1	P20700;E9PBF6	P20700	S	23;23	GGPttPLsPtRLsRL	SRAGGPTTPLSPTRLSRLQEK
0.128098	206030000	0.370716		LMNB1	Lamin-B1	P20700;E9PBF6	P20700	T	20;20	srAGGPttPLsPtRL	RMGSRAGGPTTPLSPTRLSRL
0.128061	897720000	0.370854		SF1	Splicing factor 1	Q15637-4;Q15637-6;C9JJE2;Q15637-3;Q15637-2;Q15637;Q15637-5	Q15637-4	S	80;80;54;80;80;80;205	PPNPEDRsPsPEPIy	LGIPPNPEDRSPSPEPIYNSE
0.128061	897720000	0.370854		SF1	Splicing factor 1	Q15637-4;Q15637-6;C9JJE2;Q15637-3;Q15637-2;Q15637;Q15637-5	Q15637-4	S	82;82;56;82;82;82;207	NPEDRsPsPEPIyNs	IPPNPEDRSPSPEPIYNSEGK
0.12806	24744000	0.370855		HNRNPUL2-BSCL2;HNRNPUL2	Heterogeneous nuclear ribonucleoprotein U-like protein 2	H3BQZ7;Q1KMD3	H3BQZ7	S	185;185	EQGDDQDsEksKPAG	AAEEQGDDQDSEKSKPAGSDG
0.12806	24744000	0.370855		HNRNPUL2-BSCL2;HNRNPUL2	Heterogeneous nuclear ribonucleoprotein U-like protein 2	H3BQZ7;Q1KMD3	H3BQZ7	S	188;188	DDQDsEksKPAGsDG	EQGDDQDSEKSKPAGSDGERR
0.12806	79029000	0.370855		HNRNPUL2-BSCL2;HNRNPUL2	Heterogeneous nuclear ribonucleoprotein U-like protein 2	H3BQZ7;Q1KMD3	H3BQZ7	S	193;193	EksKPAGsDGERRGV	QDSEKSKPAGSDGERRGVKRQ
0.128048	27981000	0.370902		MAP1S	Microtubule-associated protein 1S;MAP1S heavy chain;MAP1S light chain	B4DH53;Q66K74	B4DH53	S	446;472	EGPGRAEsKEsVGsR	QDLEGPGRAESKESVGSRDSS
0.128048	27981000	0.370902		MAP1S	Microtubule-associated protein 1S;MAP1S heavy chain;MAP1S light chain	B4DH53;Q66K74	B4DH53	S	449;475	GRAEsKEsVGsRDSS	EGPGRAESKESVGSRDSSKRE
0.12803	643660	0.37097		SF3B2	Splicing factor 3B subunit 2	E9PPJ0;Q13435;H0YEX5	E9PPJ0	T	722;739;160		EDKPDETGFITPADSGLITPG
0.127843	279340000	0.371674		GATAD2B	Transcriptional repressor p66-beta	Q8WXI9	Q8WXI9	T	120	EPERGRLtPsPDIIV	RRSEPERGRLTPSPDIIVLSD
0.127792	14323000	0.371864		UIMC1	BRCA1-A complex subunit RAP80	F2Z2T8;F8VQY2;Q96RL1-2;Q96RL1-3;Q96RL1;D6RCF3;D6RC40;D6RCQ3;Q96RL1-5	F2Z2T8	S	23;101;101;23;101;101;101;101;101	QEAREVNsQEEEEEE	MSEQEAREVNSQEEEEEELLR
0.127709	59469000	0.372177		LUC7L3	Luc7-like protein 3	H0YBV7;H0YAR4;B4DJ96;O95232	H0YBV7	S	33;35;308;384		RKSKEKEKRGSDDKKSSVKSG
0.127676	28734000	0.372303		RAB11FIP1	Rab11 family-interacting protein 1	E7EX40;Q6WKZ4-2;Q6WKZ4-3;Q6WKZ4	E7EX40	S	51;51;199;199	IIPSTTPsVDsDDEs	ASAIIPSTTPSVDSDDESVVK
0.12767	50014000	0.372324		MECP2	Methyl-CpG-binding protein 2	F5H1U8;P51608;P51608-2	F5H1U8	S	346;346;358		LKTCKSPGRKSKESSPKGRSS
0.12767	50014000	0.372324		MECP2	Methyl-CpG-binding protein 2	F5H1U8;P51608;P51608-2	F5H1U8	S	350;350;362		KSPGRKSKESSPKGRSSSASS
0.127564	28326000	0.372723		PPAPDC2	Presqualene diphosphate phosphatase	Q8IY26	Q8IY26	S	61	TCARLRAsEsPVHRR	VDPTCARLRASESPVHRRGSF
0.127564	28326000	0.372723		PPAPDC2	Presqualene diphosphate phosphatase	Q8IY26	Q8IY26	S	63	ARLRAsEsPVHRRGs	PTCARLRASESPVHRRGSFPL
0.12753	7532400	0.372853		GRK6;GRK5	G protein-coupled receptor kinase 6;G protein-coupled receptor kinase 5	F8W9W2;P43250-3;P43250;P43250-2;B4DPB3;G8JLE8;P34947	F8W9W2	T	451;485;485;485;228;380;485	LDIEQFstVkGVELE	KDVLDIEQFSTVKGVELEPTD
0.127393	2493200000	0.373371		NOC2L	Nucleolar complex protein 2 homolog	Q9Y3T9	Q9Y3T9	S	49	EAREAARsPDKPGGs	ETREAREAARSPDKPGGSPSA
0.127106	54623000	0.374456		TRIM28	Transcription intermediary factor 1-beta	Q13263-2;Q13263	Q13263-2	S	358;440	SkQGsGssQPMEVQE	GPLSKQGSGSSQPMEVQEGYG
0.127062	19066000	0.374622		E4F1		H3BQZ4	H3BQZ4	S	173		TLLVVGTSKRSSWLLRRSWET
0.127057	3677500	0.37464		RBSN	Rabenosyn-5	Q9H1K0	Q9H1K0	S	230	VHGsRRGsISsMSSV	PNSVHGSRRGSISSMSSVSSV
0.127057	3677500	0.37464		RBSN	Rabenosyn-5	Q9H1K0	Q9H1K0	S	232		SVHGSRRGSISSMSSVSSVLD
0.127057	3677500	0.37464		RBSN	Rabenosyn-5	Q9H1K0	Q9H1K0	S	233	sRRGsISsMSSVSSV	VHGSRRGSISSMSSVSSVLDE
0.127057	3677500	0.37464		RBSN	Rabenosyn-5	Q9H1K0	Q9H1K0	S	235		GSRRGSISSMSSVSSVLDEKD
0.127057	3677500	0.37464		RBSN	Rabenosyn-5	Q9H1K0	Q9H1K0	S	236		SRRGSISSMSSVSSVLDEKDD
0.127057	3677500	0.37464		RBSN	Rabenosyn-5	Q9H1K0	Q9H1K0	S	238		RGSISSMSSVSSVLDEKDDDR
0.126955	364940000	0.375027		YTHDC1	YTH domain-containing protein 1	Q96MU7;Q96MU7-2	Q96MU7;Q96MU7-2	S	152;152	KsPtPDGsERIGLEV	RRAKSPTPDGSERIGLEVDRR
0.126925	15039000	0.375142		BMS1	Ribosome biogenesis protein BMS1 homolog	Q14692	Q14692	S	494		KRRKLELEEDSEMDLPAFADS
0.126873	56352000	0.375337		MLLT1	Protein ENL	Q03111	Q03111	T	266	KETKLEstsPKGGPP	MALKETKLESTSPKGGPPPPP
0.126833	297140000	0.375489		MAP4	Microtubule-associated protein;Microtubule-associated protein 4	E7EVA0;P27816-2;P27816;P27816-6;B9ZVR1;P27816-5;E9PGM5;H0Y2V1;H7C4C5;F8W9U4;B4DSQ1	E7EVA0	T	2087;769;942;942;670;669;677;308;353;673;94	VRsKVGstENIkHQP	LKNVRSKVGSTENIKHQPGGG
0.126821	9340000	0.375536		CD2AP	CD2-associated protein	Q9Y5K6	Q9Y5K6	S	458	QLPLRPKsVDFDsLt	DSEQLPLRPKSVDFDSLTVRT
0.126689	277080000	0.376035		SRRM2	Serine/arginine repetitive matrix protein 2	Q9UQ35;Q9UQ35-2;I3L2L6;F5GWZ7	Q9UQ35	T	1492;1492;1492;744	EPKALPQtPRPRsRs	SSPEPKALPQTPRPRSRSPSS
0.126622	18809000	0.376288		BCL2L12	Bcl-2-like protein 12	Q9HB09-3;Q9HB09	Q9HB09-3	S	242;243	sKLVRLssDsFARLV	ALRSKLVRLSSDSFARLVELF
0.126534	126470000	0.376621		NUCKS1	Nuclear ubiquitous casein and cyclin-dependent kinase substrate 1	Q9H1E3;Q9H1E3-2	Q9H1E3	S	214;174	EEDEEPEsPPEkKts	SPKEEDEEPESPPEKKTSTSP
0.12651	36834000	0.376716		RAB3GAP2	Rab3 GTPase-activating protein non-catalytic subunit	Q9H2M9	Q9H2M9	S	875	DSEALTDsWEALSLD	LGADSEALTDSWEALSLDTEY
0.126279	33235000	0.377593		LARP4	La-related protein 4	Q71RC2-2;G3XAA8;Q71RC2-3;Q71RC2;Q71RC2-4;G5E976	Q71RC2-2	S	603;651;721;722;728;651	EQyVPPRsPK_____	NGKEQYVPPRSPK________
0.126238	34720000	0.377749		ZNF106	Zinc finger protein 106	Q9H2Y7;E9PE29;H3BS99	Q9H2Y7	S	1419;647;386		EQESVRDEPDSDSSLEVLEIP
0.126238	34720000	0.377749		ZNF106	Zinc finger protein 106	Q9H2Y7;E9PE29;H3BS99	Q9H2Y7	S	1421;649;388		ESVRDEPDSDSSLEVLEIPNP
0.126238	34720000	0.377749		ZNF106	Zinc finger protein 106	Q9H2Y7;E9PE29;H3BS99	Q9H2Y7	S	1422;650;389		SVRDEPDSDSSLEVLEIPNPQ
0.126146	885340000	0.378097		CCDC86	Coiled-coil domain-containing protein 86	Q9H6F5;E7ES61;H0YG79	Q9H6F5	S	47;47;41	EEtREPGsPPsVQRA	SNPEETREPGSPPSVQRAGLG
0.126146	6648800	0.378097		CCDC86	Coiled-coil domain-containing protein 86	Q9H6F5;E7ES61;H0YG79	Q9H6F5	S	50;50;44	REPGsPPsVQRAGLG	EETREPGSPPSVQRAGLGSPE
0.126146	36642000	0.378097		CCDC86	Coiled-coil domain-containing protein 86	Q9H6F5;E7ES61;H0YG79	Q9H6F5	T	42;42;36	FEsNPEEtREPGsPP	LVEFESNPEETREPGSPPSVQ
0.126116	126410000	0.378213		SRRM2	Serine/arginine repetitive matrix protein 2	Q9UQ35;Q9UQ35-2;I3L2L6;F5GWZ7	Q9UQ35	S	1864;1864;1864;1116	sPAPWKRsRsRAsPA	SRTSPAPWKRSRSRASPATHR
0.125913	11550000	0.378987		SRRM2	Serine/arginine repetitive matrix protein 2	I3L4D8;I3L182;Q9UQ39;I3L1I8;Q9UQ35-3;Q9UQ35;Q9UQ35-2;I3L2L6	I3L4D8;Q9UQ35	S	281;185;246;185;185;281;281;281		SSDTSRSRSRSAAAKTHTTAL
0.125908	31917000	0.379005		CALD1	Caldesmon	F5H1Z9;E7EX44;Q05682-5;Q05682-4;Q05682-3;Q05682-6;Q05682-2;Q05682	F5H1Z9	S	539;553;528;534;554;559;560;789	QSVDKVTsPTKV___;QsVDKVtsPtKV___	WEKQSVDKVTSPTKV______
0.125895	9546600	0.379056		POM121;POM121B	Nuclear envelope pore membrane protein POM 121;Putative nuclear envelope pore membrane protein POM 121B	Q96HA1;Q96HA1-2;Q96HA1-3;A8MXF9;A6NF01	Q96HA1	S	584;319;319;319;168		TFTLPAAAPASPPTSLLAPST
0.125861	885040	0.379183		MBD1	Methyl-CpG-binding domain protein 1	B4DI41;Q9UIS9-4;Q9UIS9-8;Q9UIS9-7;Q9UIS9-6;Q9UIS9-5;Q9UIS9-2;Q9UIS9;Q9UIS9-9	B4DI41	S	442;335;368;335;391;342;368;391;416	RLLPsVWsEsEDGAG	AMKRLLPSVWSESEDGAGSPP
0.125861	885040	0.379183		MBD1	Methyl-CpG-binding domain protein 1	B4DI41;Q9UIS9-4;Q9UIS9-8;Q9UIS9-7;Q9UIS9-6;Q9UIS9-5;Q9UIS9-2;Q9UIS9;Q9UIS9-9	B4DI41	S	444;337;370;337;393;344;370;393;418	LPsVWsEsEDGAGsP	KRLLPSVWSESEDGAGSPPPY
0.125861	885040	0.379183		MBD1	Methyl-CpG-binding domain protein 1	B4DI41;Q9UIS9-4;Q9UIS9-8;Q9UIS9-7;Q9UIS9-6;Q9UIS9-5;Q9UIS9-2;Q9UIS9;Q9UIS9-9	B4DI41	S	450;343;376;343;399;350;376;399;424	EsEDGAGsPPPyRRR	VWSESEDGAGSPPPYRRRKRP
0.125758	6859900000	0.379578		PGRMC1	Membrane-associated progesterone receptor component 1	B7Z1L3;O00264	B7Z1L3	S	129;181	GEEPtVysDEEEPKD	LKEGEEPTVYSDEEEPKDESA
0.125705	213000000	0.37978		TOMM22	Mitochondrial import receptor subunit TOM22 homolog	Q9NS69	Q9NS69	S	15	AGAGEPQsPDELLPK	VAAAGAGEPQSPDELLPKGDA
0.12567	139140000	0.379911		LARP1	La-related protein 1	Q6PKG0;Q6PKG0-3	Q6PKG0	S	847;770	EHRPRtAsIsssPsE	DSREHRPRTASISSSPSEGTP
0.125381	71718000	0.381018		PPHLN1	Periphilin-1	F8W0Q9;Q8NEY8-5;Q8NEY8-6;Q8NEY8-8;Q8NEY8-2;Q8NEY8-3;Q8NEY8;F8WF16;F8W6A0;E9PAX8;F8VPY7;F8VWU8	F8W0Q9	S	161;95;95;143;150;88;143;95;42;143;150;143		SPVGRKDSPHSRSGSSVSSRS
0.125377	159330000	0.381033		C9orf142	Protein PAXX	Q9BUH6	Q9BUH6	S	148	AAEEtAVsPRKsPRP	RLAAAEETAVSPRKSPRPAGP
0.125377	12462000	0.381033		C9orf142	Protein PAXX	Q9BUH6	Q9BUH6	S	152	tAVsPRKsPRPAGPQ	AEETAVSPRKSPRPAGPQLFL
0.12526	5198800	0.381478		WDR62	WD repeat-containing protein 62	O43379;O43379-4	O43379	S	1248;1253	AQPLRRPssVGELAs	ATLAQPLRRPSSVGELASLGQ
0.125136	58017000	0.381953		TRA2B	Transformer-2 protein homolog beta	P62995	P62995	S	20		GERESRSASRSGSAHGSGKSA
0.125101	5969400	0.382088		CEP170	Centrosomal protein of 170 kDa	H0Y2V6;Q5SW79-3;Q5SW79;Q5SW79-2	H0Y2V6	T	724;662;760;662	QREEAQWtPTKLSSK	QQEQREEAQWTPTKLSSKNVS
0.125045	3014300	0.382303		NELFA;WHSC2	Negative elongation factor A	H7C2C7;B3KSP0;H0Y3X6;Q9H3P2;Q9H3P2-7	H7C2C7	S	228;192;331;327;64		PALPSTSYLPSTPSVVPASSY
0.124915	7186100	0.382801		ORC1	Origin recognition complex subunit 1	Q13415	Q13415	S	199	AKsKsAEsPsWtPAE	PVRAKSKSAESPSWTPAEHVA
0.124915	7186100	0.382801		ORC1	Origin recognition complex subunit 1	Q13415	Q13415	S	201	sKsAEsPsWtPAEHV	RAKSKSAESPSWTPAEHVAKR
0.124782	3711900	0.383313		ATG9A	Autophagy-related protein 9A	Q7Z3C6;H7C1G6;H7C152;Q7Z3C6-2	Q7Z3C6	S	656;215;72;595	AsALRsFsPLQPGQA	AEVASALRSFSPLQPGQAPTG
0.12472	32377000	0.383551		USF1;USF2	Upstream stimulatory factor 2;Upstream stimulatory factor 1	H0YD59;E9PME6;B1AQP1;Q6YI47;Q7Z5Y1;Q15853-3;P22415;Q15853-2;Q15853	H0YD59	S	53;125;158;91;127;155;186;222;222	APRTHPYsPKsEAPR	RSIAPRTHPYSPKSEAPRTTR
0.12457	1119900	0.384126		FAM83B	Protein FAM83B	Q5T0W9	Q5T0W9	T	687	sKHyVystLTRNRVR	PGNSKHYVYSTLTRNRVRQPE
0.124543	197510000	0.38423		IGF2R	Cation-independent mannose-6-phosphate receptor	P11717	P11717	S	2484	LVsFHDDsDEDLLHI	STKLVSFHDDSDEDLLHI___
0.124359	20476000	0.384937		PBX2	Pre-B-cell leukemia transcription factor 2	F8VSK3;H0YI03;F8VNW9;P40425;F8VWH6	F8VSK3	S	151;164;151;151;151	AASGGGVsPDNSIEH	AAAAASGGGVSPDNSIEHSDY
0.124275	10316000000	0.38526		RPS6	40S ribosomal protein S6	P62753;A2A3R5	P62753	S	242;211	ssLRAstsKsEssQK	RRLSSLRASTSKSESSQK___
0.124198	85473000	0.385557		SRRM1	Serine/arginine repetitive matrix protein 1	E9PCT1;A9Z1X7;Q8IYB3;Q8IYB3-2;B4DED5	E9PCT1	S	207;207;207;207;76	SPRHRTKsRsPsPAP;sPRHRtKsRsPsPAP	HSRSPRHRTKSRSPSPAPEKK
0.124198	85473000	0.385557		SRRM1	Serine/arginine repetitive matrix protein 1	E9PCT1;A9Z1X7;Q8IYB3;Q8IYB3-2;B4DED5	E9PCT1	S	209;209;209;209;78	RHRTKsRsPsPAPEK;RHRtKsRsPsPAPEK	RSPRHRTKSRSPSPAPEKKEK
0.124198	85473000	0.385557		SRRM1	Serine/arginine repetitive matrix protein 1	E9PCT1;A9Z1X7;Q8IYB3;Q8IYB3-2;B4DED5	E9PCT1	S	211;211;211;211;80	RTKsRsPsPAPEKKE;RtKsRsPsPAPEKKE	PRHRTKSRSPSPAPEKKEKTP
0.12418	3120400	0.385627		ZNF318	Zinc finger protein 318	Q5VUA4-2;Q5VUA4	Q5VUA4-2	S	136;136	DSGSRRRsPGLCsDs	HPGDSGSRRRSPGLCSDSLEK
0.124088	102640000	0.38598		KAT7	Histone acetyltransferase KAT7	G5E9K7;O95251;O95251-2	G5E9K7	T	88;88;88	QQQPtPVtPKKYPLR	TRSQQQPTPVTPKKYPLRQTR
0.123995	1666900	0.38634		IRS2	Insulin receptor substrate 2	Q9Y4H2	Q9Y4H2	T	1102		KPEAARVASPTSGVKRLSLME
0.123908	215010000	0.386675		POLR2A	DNA-directed RNA polymerase II subunit RPB1	P24928	P24928	S	1920	sPtysPtsPKysPts	SPTSPTYSPTSPKYSPTSPTY
0.123787	19299000	0.387142		PCYT1A	Choline-phosphate cytidylyltransferase A	B4E322;P49585;C9JEJ2	B4E322	S	290;329;329	ssPtRERsPsPsFRW	SPSSSPTRERSPSPSFRWPFS
0.123787	35669000	0.387142		PCYT1A	Choline-phosphate cytidylyltransferase A	B4E322;P49585;C9JEJ2	B4E322	S	292;331;331	PtRERsPsPsFRWPF	SSSPTRERSPSPSFRWPFSGK
0.123681	1756400	0.387551		RTN1	Reticulon;Reticulon-1	Q2NKQ5;Q16799-2;Q16799	Q2NKQ5	S	372;26;446		HVGGPPPSPASPSIQYSILRE
0.123641	116140000	0.387706		MDC1	Mediator of DNA damage checkpoint protein 1	F8VV34;E7EVA7;Q14676-3;Q14676	F8VV34	S	793;793;793;793	PGDQHPEsPVHtEPM	RAIPGDQHPESPVHTEPMGIQ
0.123578	104150000	0.387949		RFC1	Replication factor C subunit 1	P35251-2;P35251;D6RAD2	P35251-2	T	110;110;82	PVtyIsEtDEEDDFM	RQDPVTYISETDEEDDFMCKK
0.123541	622970000	0.388093		SRRM2	Serine/arginine repetitive matrix protein 2	Q9UQ35;Q9UQ35-2;I3L2L6;F5GWZ7	Q9UQ35	S	1601;1601;1601;853	RRsRsGssPEVKDKP	LSPRRSRSGSSPEVKDKPRAA
0.123494	272020000	0.388274		SLTM	SAFB-like transcription modulator	Q9NWH9;H0YL55;H7BXE3	Q9NWH9	S	289;213;271	GQDAIAQsPEKEsKD	PKDGQDAIAQSPEKESKDYEM
0.123317	166870000	0.38896		SRRM2	Serine/arginine repetitive matrix protein 2	Q9UQ35;Q9UQ35-2;I3L2L6;F5GWZ7	Q9UQ35	S	1311;1311;1311;563	SWGGPHFsPEHKELs	MASSWGGPHFSPEHKELSNSP
0.123274	25140000	0.389127		SRRM2	Serine/arginine repetitive matrix protein 2	Q9UQ35;F5GWZ7	Q9UQ35	S	2100;1352	PPAtRNHsGsRtPPV	SATPPATRNHSGSRTPPVALN
0.123274	25140000	0.389127		SRRM2	Serine/arginine repetitive matrix protein 2	Q9UQ35;F5GWZ7	Q9UQ35	S	2102;1354	AtRNHsGsRtPPVAL	TPPATRNHSGSRTPPVALNSS
0.123274	25140000	0.389127		SRRM2	Serine/arginine repetitive matrix protein 2	Q9UQ35;F5GWZ7	Q9UQ35	T	2104;1356	RNHsGsRtPPVALNs	PATRNHSGSRTPPVALNSSRM
0.123105	16493000	0.389781		ARHGEF11	Rho guanine nucleotide exchange factor 11	O15085;O15085-2;F8W8P9	O15085	S	614;654;30	IRLGRSEsLKGREEM	RSEIRLGRSESLKGREEMKRS
0.123069	7653200	0.389921		TPX2	Targeting protein for Xklp2	Q9ULW0;Q96RR5	Q9ULW0	S	121;121	PAQPQRRsLRLsAQk	RKTPAQPQRRSLRLSAQKDLE
0.123069	7653200	0.389921		TPX2	Targeting protein for Xklp2	Q9ULW0;Q96RR5	Q9ULW0	S	125;125	QRRsLRLsAQkDLEQ	AQPQRRSLRLSAQKDLEQKEK
0.123026	9981200	0.390088		SLC9A1	Sodium/hydrogen exchanger;Sodium/hydrogen exchanger 1	Q5TBB2;Q5TBB3;B4DTZ6;P19634	Q5TBB2	S	114;197;354;693	VPAHKLDsPtMsRAR	YLTVPAHKLDSPTMSRARIGS
0.122798	12886000	0.390973		IRF2BP1	Interferon regulatory factor 2-binding protein 1	Q8IU81	Q8IU81	S	421	AEtPGVPsPIAALKN	PYSAETPGVPSPIAALKNVAE
0.122788	2855700000	0.39101		BCLAF1	Bcl-2-associated transcription factor 1	Q9NYF8-2;Q9NYF8;E9PK91;Q9NYF8-3;E9PQN2;E9PKI6;E9PK09;Q9NYF8-4;E9PJA7;H0YF00	Q9NYF8-2	S	283;285;285;283;283;285;285;285;283;26	GNGssRysPsQNsPI	GSVGNGSSRYSPSQNSPIHHI
0.122546	28014000	0.391951		HERC2	E3 ubiquitin-protein ligase HERC2	O95714	O95714	S	2928	AAVPFLAsDNEEEED	EDLAAVPFLASDNEEEEDEKG
0.122415	605530000	0.392464		SRRM1	Serine/arginine repetitive matrix protein 1	E9PCT1;A9Z1X7;Q8IYB3;Q8IYB3-2	E9PCT1	S	916;913;904;902	KAQVsPQs_______	SMRKAQVSPQS__________
0.122398	50975000	0.392527		KHSRP	Far upstream element-binding protein 2	Q92945;Q92945-2	Q92945	S	480;480	KLFIIRGsPQQIDHA	PNFKLFIIRGSPQQIDHAKQL
0.12214	5496400	0.393534		AFTPH	Aftiphilin	Q6ULP2-3;Q6ULP2-5;Q6ULP2-2;Q6ULP2-4;Q6ULP2	Q6ULP2-3	S	226;226;226;226;226	YNLDSVPsPAEEFAD	STEYNLDSVPSPAEEFADFAT
0.121917	14731000	0.394405		PRRC2B	Protein PRRC2B	Q5JSZ5;Q5JSZ5-5	Q5JSZ5	S	388;388	YSEKLKFsDDEEEEE	EVDYSEKLKFSDDEEEEEVVK
0.121881	4167200	0.394543		RAB40C	Ras-related protein Rab-40C	H3BUX0;H3BME4;H3BTC6;H3BNV8;Q96S21	H3BUX0	S	6;6;6;6;6	__MGSQGsPVKSYDY	_____MGSQGSPVKSYDYLLK
0.121809	148660000	0.394826		USP24	Ubiquitin carboxyl-terminal hydrolase 24	B7WPF4;Q9UPU5	B7WPF4	S	981;1141	sssQssKsPsLSSKQ	LSESSSQSSKSPSLSSKQQHQ
0.121809	2699000000	0.394826		SRRM1	Serine/arginine repetitive matrix protein 1	E9PCT1;A9Z1X7;Q8IYB3;Q8IYB3-2	E9PCT1	S	665;662;653;651	sPVtKRRsPsLSsKH	QRSSPVTKRRSPSLSSKHRKG
0.12172	73748000	0.395173		TPX2	Targeting protein for Xklp2	Q9ULW0;Q96RR5	Q9ULW0	S	186;186	tAEKNAssPEKAKGR	HQDTAEKNASSPEKAKGRHTV
0.121657	15818000	0.395419		EML4	Echinoderm microtubule-associated protein-like 4	B5MBZ0;Q9HC35;B5MCW9;F2Z2B5	B5MBZ0	S	949;938;880;202	VEPsEDHsEEEsEEG	EQTVEPSEDHSEEESEEGSGD
0.121511	24565000	0.39599		LBR	Lamin-B receptor	Q14739;C9JXK0	Q14739	S	84;84	GSRSRsRsRsPGRPP	RRRGSRSRSRSRSPGRPPKSA
0.121437	177430000	0.396281		RBBP5	Retinoblastoma-binding protein 5	Q15291-2;Q15291	Q15291-2	S	388;388	DPIAAFCssDEELED	TSVDPIAAFCSSDEELEDSKA
0.121282	10220000	0.39689		SMAD5	Mothers against decapentaplegic homolog 5	F5GWU7;Q99717	F5GWU7	S	462;463	SPLNPIssVs_____	QMGSPLNPISSVS________
0.121245	2697300	0.397032		RNF167	E3 ubiquitin-protein ligase RNF167	I3L0L6;Q9H6Y7	I3L0L6	S	279;314		ASERTPLLGSSPTLPTSFGSL
0.121215	82826000	0.397152		ZNF768	Zinc finger protein 768	Q9H5H4;B7Z2Y7;H3BS42	Q9H5H4	S	132;101;101	sPGyEPRsPGyEPRs	EPQSPGYEPRSPGYEPRSPGY
0.121215	87032000	0.397152		ZNF768	Zinc finger protein 768	Q9H5H4;B7Z2Y7;H3BS42	Q9H5H4	S	139;108;108	sPGyEPRsPGyEsES	EPRSPGYEPRSPGYESESSRY
0.121215	87032000	0.397152		ZNF768	Zinc finger protein 768	Q9H5H4;B7Z2Y7;H3BS42	Q9H5H4	S	144;113;113	PRsPGyEsESSRYES	GYEPRSPGYESESSRYESQNT
0.121033	166100000	0.397867		CAP1	Adenylyl cyclase-associated protein 1;Adenylyl cyclase-associated protein	F5H6Z3;Q01518;Q01518-2;Q5T0R8;Q5T0S3;Q5T0R7;Q5T0R6;Q5T0R5;Q5T0R4;Q5T0R3;Q5T0R2;Q5T0R1;Q5T0R9	F5H6Z3	S	11;34;34;34;34;34;34;34;34;34;34;34;34	MHRGyADsPsKAGAA	MADMHRGYADSPSKAGAAPYV
0.120995	4260800	0.398016		DNAJC5	DnaJ homolog subfamily C member 5	Q9H3Z4-2;Q9H3Z4	Q9H3Z4-2	T	11;11	QRQRsLstsGEsLyH	MADQRQRSLSTSGESLYHVLG
0.120908	128180000	0.398357		TOR1AIP1	Torsin-1A-interacting protein 1	E9PKD1;Q5JTV8;C9J3B0;Q5JTV8-2;H0YDU3;H0YD16	E9PKD1	S	143;143;143;143;46;15	EQPPLQPsPVMtRRG	QHSEQPPLQPSPVMTRRGLRD
0.120682	513550000	0.399246		ACIN1	Apoptotic chromatin condensation inducer in the nucleus	Q9UKV3-5;E7EQT4;Q9UKV3	Q9UKV3-5	S	729;689;729	RLQPERGsPKKCEAE	VTQRLQPERGSPKKCEAEEAE
0.120642	184340000	0.399403		FOXK1	Forkhead box protein K1	P85037	P85037	S	101	AAASVRQsPGPALAR	VAAAAASVRQSPGPALARLEG
0.120469	5175100	0.400083		CHTF18	Chromosome transmission fidelity protein 18 homolog	E7EXA6;Q8WVB6;Q8WVB6-2	E7EXA6	S	233;36;36	LEGAStPsPSGVPLF	LAELEGASTPSPSGVPLFTAG
0.120469	5175100	0.400083		CHTF18	Chromosome transmission fidelity protein 18 homolog	E7EXA6;Q8WVB6;Q8WVB6-2	E7EXA6	T	231;34;34	AELEGAStPsPSGVP	EVLAELEGASTPSPSGVPLFT
0.120355	8267700	0.400534		PKNOX2	Homeobox protein PKNOX2	B7ZAF3;F5GZ15;Q96KN3	B7ZAF3	S	439;404;468		TNVSDLGLEHSDSLE______
0.120355	8267700	0.400534		PKNOX2	Homeobox protein PKNOX2	B7ZAF3;F5GZ15;Q96KN3	B7ZAF3	S	441;406;470		VSDLGLEHSDSLE________
0.120314	257330000	0.400696		ACIN1	Apoptotic chromatin condensation inducer in the nucleus	Q9UKV3-5;E7EQT4;Q9UKV3	Q9UKV3-5	S	710;670;710	sVQARRLsQPEsAEk	SSSSVQARRLSQPESAEKHVT
0.120314	23757000	0.400696		ACIN1	Apoptotic chromatin condensation inducer in the nucleus	Q9UKV3-5;E7EQT4;Q9UKV3	Q9UKV3-5	S	714;674;714	RRLsQPEsAEkHVtQ	VQARRLSQPESAEKHVTQRLQ
0.120267	312500000	0.40088		TMC8	Transmembrane channel-like protein 8	Q8IU68-2;Q8IU68	Q8IU68-2	S	299;522	LKNSRASsRPFRASS	YTLLKNSRASSRPFRASSSTF
0.120162	831920000	0.401294		CDK18	Cyclin-dependent kinase 18	E9PMF2;Q07002;Q07002-2;Q07002-3;D6RA44	E9PMF2	T	184;152;154;184;65	LDKLGEGtyAtVFKG	YVKLDKLGEGTYATVFKGRSK
0.120162	831920000	0.401294		CDK18	Cyclin-dependent kinase 18	E9PMF2;Q07002;Q07002-2;Q07002-3;D6RA44	E9PMF2	T	187;155;157;187;68	LGEGtyAtVFKGRSK	LDKLGEGTYATVFKGRSKLTE
0.120008	10398000	0.4019		BRSK2	Serine/threonine-protein kinase BRSK2	B4DM60;B4DLY3;E9PLM7;Q8IWQ3-3;Q8IWQ3-2;Q8IWQ3-4;Q8IWQ3;Q8IWQ3-5	B4DM60	S	77;148;322;382;382;382;382;428	KRRPERKsMEVLSVT	RHGKRRPERKSMEVLSVTDGG
0.120008	53276000	0.4019		BRSK2	Serine/threonine-protein kinase BRSK2	B4DM60;B4DLY3;E9PLM7;Q8IWQ3-3;Q8IWQ3-2;Q8IWQ3-4;Q8IWQ3;Q8IWQ3-5	B4DM60	S	88;159;333;393;393;393;393;439	LSVTDGGsPVPARRA	MEVLSVTDGGSPVPARRAIEM
0.119955	122370000	0.402111		CDK12	Cyclin-dependent kinase 12	Q9NYV4-2;Q9NYV4;Q9NYV4-3	Q9NYV4-2;Q9NYV4-3	T	893;893;892	sEEsRPytNKVITLW	LYNSEESRPYTNKVITLWYRP
0.119911	38003000	0.402284		UBAP2L	Ubiquitin-associated protein 2-like	F8W726;Q14157-4;Q14157-1;Q14157-3;Q14157;Q14157-5;C9JD99;F5GY23;H0Y5H6;H7C2T8	F8W726	S	882;864;871;871;871;871;367;367;150;202		DLTKFGRGDASSPAPATTLAQ
0.119885	87424000	0.402386		HIRIP3	HIRA-interacting protein 3	Q9BW71;Q9BW71-2	Q9BW71	S	551;238	HMRGIIssDGEsN__	DWSHMRGIISSDGESN_____
0.119885	87424000	0.402386		HIRIP3	HIRA-interacting protein 3	Q9BW71;Q9BW71-2	Q9BW71	S	555;242	IIssDGEsN______	MRGIISSDGESN_________
0.119853	10479000	0.402514		POLR2A	DNA-directed RNA polymerase II subunit RPB1	P24928	P24928	S	1845	KytPtsPsysPssPE	ASPKYTPTSPSYSPSSPEYTP
0.119853	6664100	0.402514		POLR2A	DNA-directed RNA polymerase II subunit RPB1	P24928	P24928	S	1849	tsPsysPssPEytPt	YTPTSPSYSPSSPEYTPTSPK
0.119853	43104000	0.402514		POLR2A	DNA-directed RNA polymerase II subunit RPB1	P24928	P24928	S	1850	sPsysPssPEytPts	TPTSPSYSPSSPEYTPTSPKY
0.119853	8650000	0.402514		POLR2A	DNA-directed RNA polymerase II subunit RPB1	P24928	P24928	S	1857	sPEytPtsPKysPts	SPSSPEYTPTSPKYSPTSPKY
0.119772	11890000	0.402835		POLR2A	DNA-directed RNA polymerase II subunit RPB1	P24928	P24928	S	1843	sPKytPtsPsysPss	SPASPKYTPTSPSYSPSSPEY
0.119681	15619000	0.403193		RBBP6	E3 ubiquitin-protein ligase RBBP6	Q7Z6E9-2;Q7Z6E9;H3BSK8;Q7Z6E9-4	Q7Z6E9-2	S	360;360;227;360	NLQPLMRsPIsRQQD	IQRNLQPLMRSPISRQQDPLM
0.119616	107010000	0.403454		OXSR1	Serine/threonine-protein kinase OSR1	C9JIG9;O95747	C9JIG9	S	427;427	ALSSGsGsQEtKIPI	TAQALSSGSGSQETKIPISLV
0.119509	5025700	0.403877		VPS13C	Vacuolar protein sorting-associated protein 13C	Q709C8-4;Q709C8-2;Q709C8-3;Q709C8	Q709C8-4	S	829;872;829;872		GTSLLLDTVESESDDEYFDAE
0.119509	5025700	0.403877		VPS13C	Vacuolar protein sorting-associated protein 13C	Q709C8-4;Q709C8-2;Q709C8-3;Q709C8	Q709C8-4	S	831;874;831;874		SLLLDTVESESDDEYFDAEDG
0.119489	6417000	0.403956		PIAS1	E3 SUMO-protein ligase PIAS1	O75925;B3KSY9;H3BS65	O75925	S	503;505;10	LsLPHQAsPVsRtPs	KGILSLPHQASPVSRTPSLPA
0.119474	59897000	0.404013		CDC20	Cell division cycle protein 20 homolog	Q12834;B4E1H5	Q12834	S	51;51	RAANRsHsAGRtPGR	SPMRAANRSHSAGRTPGRTPG
0.119474	156340000	0.404013		CDC20	Cell division cycle protein 20 homolog	Q12834;B4E1H5	Q12834	T	55;55	RsHsAGRtPGRtPGk	AANRSHSAGRTPGRTPGKSSS
0.119474	164080000	0.404013		CDC20	Cell division cycle protein 20 homolog	Q12834;B4E1H5	Q12834	T	59;59	AGRtPGRtPGkSSSk	SHSAGRTPGRTPGKSSSKVQT
0.119353	231500000	0.404493		WDR43	WD repeat-containing protein 43	Q15061	Q15061	S	77	ARLQAKEsPQRKKRK	WAPARLQAKESPQRKKRKSEA
0.119078	187410000	0.405587		THRAP3	Thyroid hormone receptor-associated protein 3	Q9Y2W1	Q9Y2W1	S	917	rFMFRKsstsPKWAH	GRGRFMFRKSSTSPKWAHDKF
0.119056	42311000	0.405674		BAZ2A	Bromodomain adjacent to zinc finger domain protein 2A	F8VU39;Q9UIF9-2;Q9UIF9-3;Q9UIF9;H0YHQ7	F8VU39	S	368;343;370;370;18		TSTSIFASPTSPPVLGESVLQ
0.119056	18170000	0.405674		BAZ2A	Bromodomain adjacent to zinc finger domain protein 2A	F8VU39;Q9UIF9-2;Q9UIF9-3;Q9UIF9;H0YHQ7	F8VU39	S	381;356;383;383;31		VLGESVLQDNSFDLNNGSDAE
0.119052	42767000	0.405689		MYCBP2	E3 ubiquitin-protein ligase MYCBP2	O75592-2;O75592;F8WA13	O75592-2	T	2859;2859;382	EPLRGRstSPKPKsV	PLTEPLRGRSTSPKPKSVPKD
0.11902	1009000	0.405818		MAP4K4	Mitogen-activated protein kinase kinase kinase kinase 4	H7C0P6;G5E948;O95819-3;H7C360;O95819-2;O95819;E7EN19	H7C0P6	S	320;580;580;511;549;580;549	FRKtNHSsPEAQSKQ	EDRFRKTNHSSPEAQSKQTGR
0.118981	32649000	0.405969		MED24	Mediator of RNA polymerase II transcription subunit 24	H0YEG1;F8W9R9;F5H0K1;O75448-2;O75448	H0YEG1	S	49;783;815;860;873	DDANILssPtDRSMS	SNEDDANILSSPTDRSMSSSL
0.118956	20898000	0.406072		ESF1	ESF1 homolog	Q9H501	Q9H501	S	312	GKGNIEtssEDEDDt	LARGKGNIETSSEDEDDTADL
0.118956	20898000	0.406072		ESF1	ESF1 homolog	Q9H501	Q9H501	S	313	KGNIEtssEDEDDtA	ARGKGNIETSSEDEDDTADLF
0.118956	20898000	0.406072		ESF1	ESF1 homolog	Q9H501	Q9H501	T	311	RGKGNIEtssEDEDD	DLARGKGNIETSSEDEDDTAD
0.118944	46973000	0.406117		MAP7D1	MAP7 domain-containing protein 1	Q3KQU3-4;Q3KQU3;Q3KQU3-2;C9JIR3;E9PLH3	Q3KQU3-4	S	125;125;125;86;86	tAVPAsDsPPtKQEV	PSPTAVPASDSPPTKQEVKKA
0.118706	907400000	0.407065		TSR2	Pre-rRNA-processing protein TSR2 homolog	Q969E8	Q969E8	S	142		ETDEDEDDVDSVEEMEVTATN
0.118672	13860000	0.4072		MAP3K4	Mitogen-activated protein kinase kinase kinase 4	F5H4R1;F5H0A4;F5H538;Q9Y6R4-2;Q9Y6R4;F5H1X6;F5H443	F5H4R1	S	84;84;84;84;84;84;63	TENLyGTsPPsTPRQ	ETNTENLYGTSPPSTPRQMKR
0.118555	6074200	0.407665		NUP98	Nuclear pore complex protein Nup98-Nup96;Nuclear pore complex protein Nup98;Nuclear pore complex protein Nup96	P52948-2;P52948-5;P52948;P52948-6;H7C3P6	P52948-2	S	1725;1799;1816;1713;752		QSYLRELAVGSL_________
0.118443	13102000	0.408114		RASAL2	Ras GTPase-activating protein nGAP	B1AKC7;F8W755;H0Y638;Q9UJF2	B1AKC7	T	995;1006;416;865	ALPRQNstGQAQIRk	IPLALPRQNSTGQAQIRKVDQ
0.118361	9927500	0.408441		LLGL2;LLGL1	Lethal(2) giant larvae protein homolog 2;Lethal(2) giant larvae protein homolog 1	G3V1I9;Q6P1M3-2;Q6P1M3;Q15334	G3V1I9	S	642;653;653;663	LKKsLRQsFRRMRRS	VKSLKKSLRQSFRRMRRSRVS
0.118346	422820000	0.408498		DDX21	Nucleolar RNA helicase 2	Q9NR30;Q3SWU7	Q9NR30	S	71;71	PsEVDMNsPKSKKAK	KAEPSEVDMNSPKSKKAKKKE
0.118176	354820000	0.409179		SF3B1	Splicing factor 3B subunit 1	O75533	O75533	T	207	WDQtADQtPGAtPKK	KRRWDQTADQTPGATPKKLSS
0.118152	21024000	0.409274		GAPVD1	GTPase-activating protein and VPS9 domain-containing protein 1	Q14C86-2;Q14C86-6;Q14C86-3;Q14C86-5;Q14C86;H0Y7I9;C9IZ08;B4DGD8;Q14C86-4;F8W9S7;H0Y4E7	Q14C86-2;Q14C86-4	S	595;595;595;595;595;458;595;595;574;574;432		SVSSLDLEGESVSELGAGPSG
0.117984	35540000	0.409945		EPB41	Protein 4.1	E9PEX0;H3BLV6;P11171-6;P11171-3;P11171-5;P11171-2;P11171;C9JTS2;E9PEW9;P11171-4;P11171-7	E9PEX0	S	552;675;414;489;623;679;712;698;658;470;698	DKRLSTHsPFRTLNI;DKRLstHsPFRtLNI	SEWDKRLSTHSPFRTLNINGQ
0.117984	24592000	0.409945		IRF2BP2	Interferon regulatory factor 2-binding protein 2	Q7Z5L9-2;Q7Z5L9;Q7Z5L9-3	Q7Z5L9-2	S	441;457;33	TTRRNsNsPPsPssM	VHSTTRRNSNSPPSPSSMNQR
0.117984	24592000	0.409945		IRF2BP2	Interferon regulatory factor 2-binding protein 2	Q7Z5L9-2;Q7Z5L9;Q7Z5L9-3	Q7Z5L9-2	S	444;460;36	RNsNsPPsPssMNQR	TTRRNSNSPPSPSSMNQRRLG
0.117875	4799300	0.41038		HOXA10	Homeobox protein Hox-A10	Q5I0Y5;P31260	Q5I0Y5	S	76;93	GKRNEAAsPGSGGGG	TLGGKRNEAASPGSGGGGGGL
0.117855	9958600	0.41046		TMEM201	Transmembrane protein 201	H0Y4R5;E9PBR6;Q5SNT2	H0Y4R5	S	351;441;441	FRSPRRTsPSsLPGR	QQLFRSPRRTSPSSLPGRLSR
0.117747	182630000	0.410891		EIF4G3	Eukaryotic translation initiation factor 4 gamma 3	F5H8J4;F5H564;H7BYW0;Q504Z1;O43432;O43432-3	F5H8J4	S	646;760;1352;876;1156;1162	NTFMRGGssKDLLDN	ARPNTFMRGGSSKDLLDNQSQ
0.117693	31397000	0.411108		NASP	Nuclear autoantigenic sperm protein	B4DS57;F5H3J2;P49321;P49321-3;E9PPR5;E9PNB5	B4DS57	S	27;63;127;129;90;63	GEKtEDEsLVENNDN	EEEGEKTEDESLVENNDNIDE
0.117693	31397000	0.411108		NASP	Nuclear autoantigenic sperm protein	B4DS57;F5H3J2;P49321;P49321-3;E9PPR5;E9PNB5	B4DS57	T	23;59;123;125;86;59	EEEEGEKtEDEsLVE	VHVEEEEGEKTEDESLVENND
0.117662	33808000	0.411231		SRRM2	Serine/arginine repetitive matrix protein 2	Q9UQ35;Q9UQ35-2;I3L2L6;F5GWZ7	Q9UQ35	S	1232;1232;1232;484	QNsALPtssQDEELM	TKEQNSALPTSSQDEELMEVV
0.117662	33808000	0.411231		SRRM2	Serine/arginine repetitive matrix protein 2	Q9UQ35;Q9UQ35-2;I3L2L6;F5GWZ7	Q9UQ35	S	1233;1233;1233;485	NsALPtssQDEELME	KEQNSALPTSSQDEELMEVVE
0.117658	29442000	0.41125		SRRM2	Serine/arginine repetitive matrix protein 2	I3L4D8;I3L182;Q9UQ39;Q9UQ35;Q9UQ35-2;I3L2L6;F5GWZ7	I3L4D8;Q9UQ35	S	759;663;724;759;759;759;11	sRIssRRsRsLssPR	MKKSRISSRRSRSLSSPRSKA
0.117658	29442000	0.41125		SRRM2	Serine/arginine repetitive matrix protein 2	I3L4D8;I3L182;Q9UQ39;Q9UQ35;Q9UQ35-2;I3L2L6;F5GWZ7	I3L4D8;Q9UQ35	S	761;665;726;761;761;761;13	IssRRsRsLssPRsK	KSRISSRRSRSLSSPRSKAKS
0.117658	29442000	0.41125		SRRM2	Serine/arginine repetitive matrix protein 2	I3L4D8;I3L182;Q9UQ39;Q9UQ35;Q9UQ35-2;I3L2L6;F5GWZ7	I3L4D8;Q9UQ35	S	763;667;728;763;763;763;15	sRRsRsLssPRsKAK	RISSRRSRSLSSPRSKAKSRL
0.117658	29442000	0.41125		SRRM2	Serine/arginine repetitive matrix protein 2	I3L4D8;I3L182;Q9UQ39;Q9UQ35;Q9UQ35-2;I3L2L6;F5GWZ7	I3L4D8;Q9UQ35	S	764;668;729;764;764;764;16	RRsRsLssPRsKAKs	ISSRRSRSLSSPRSKAKSRLS
0.117576	31571000	0.411578		SRFBP1	Serum response factor-binding protein 1	Q8NEF9	Q8NEF9	S	264	EKEYFDDstEERFYK	CEEEKEYFDDSTEERFYKQSS
0.117569	33384000	0.411605		WNK1	Serine/threonine-protein kinase WNK1	F5GWT4;F5H2M7;Q9H4A3-2;Q9H4A3;Q9H4A3-5;Q9H4A3-6;F6UYG0	F5GWT4	S	185;185;185;185;185;185;185	PPPARsGsGGGsAKE	KEEPPPARSGSGGGSAKEPQE
0.117445	13541000	0.412102		STK38L	Serine/threonine-protein kinase 38-like	B4E3J8;Q9Y2H1	B4E3J8	T	190;283	RRQLAYstVGtPDyI	KKNRRQLAYSTVGTPDYIAPE
0.117334	27516000	0.412546		TNKS1BP1	182 kDa tankyrase-1-binding protein	Q9C0C2	Q9C0C2	S	1666	KLRPRNRsAEEGELA	LKAKLRPRNRSAEEGELAESK
0.117286	1324700	0.412741		BCCIP	BRCA2 and CDKN1A-interacting protein	Q9P287	Q9P287	S	281		ESDTCLGGKWSFDDVPMTPLR
0.117265	8175600	0.412825		SRF	Serum response factor	F5H6V4;P11831	F5H6V4	S	20;224	TCLNsPDsPPRsDPT	LIQTCLNSPDSPPRSDPTTDQ
0.117211	122620000	0.413039		TLE4	Transducin-like enhancer protein 4	A6NIY7;F8W6T6;Q04727;Q04727-3;H7C4W5;Q5JSY7;Q04727-2;H7C4P7	A6NIY7;H7C4P7	S	208;183;208;208;5;193;208;78	SIKSSsVsPSAsFRG	DRDSIKSSSVSPSASFRGAEK
0.117165	104750000	0.413227		MZT2B	Mitotic-spindle organizing protein 2B	H7BZ50;H7C173;B8ZZ87;Q6NZ67	H7BZ50	S	115;116;212;152	KGGGPGKsPtRGSt_	RLPKGGGPGKSPTRGST____
0.117118	12268000000	0.413413		RPS6	40S ribosomal protein S6	P62753;A2A3R5	P62753	S	244;213	LRAstsKsEssQK__	LSSLRASTSKSESSQK_____
0.116932	2222500000	0.414162		BCLAF1	Bcl-2-associated transcription factor 1	Q9NYF8-2;Q9NYF8;E9PK91;Q9NYF8-3;E9PQN2;E9PKI6;E9PK09;Q9NYF8-4	Q9NYF8-2	S	646;648;648;646;646;648;648;475	EHSTRQKsPEIHRRI	ATEEHSTRQKSPEIHRRIDIS
0.116748	10153000	0.414903		SLK	STE20-like serine/threonine-protein kinase	Q9H2G2-2;Q9H2G2	Q9H2G2-2	S	565;565	AQKVDEDsAEDtQsN	ADVAQKVDEDSAEDTQSNDGK
0.116748	43111000	0.414903		SLK	STE20-like serine/threonine-protein kinase	Q9H2G2-2;Q9H2G2	Q9H2G2-2	S	571;571	DsAEDtQsNDGKEVV	VDEDSAEDTQSNDGKEVVEVG
0.116657	90303000	0.415269		NAP1L1	Nucleosome assembly protein 1-like 1	F5H1X5;F8W020;F8VXI6;F8VUX1;F8VY35;F8W0J6;F5H4R6;B3KNT8;P55209;F8VVB5	F5H1X5	S	10;10;10;10;10;10;10;10;10;10	DIDNKEQsELDQDLD	_MADIDNKEQSELDQDLDDVE
0.11664	19566000	0.415337		SUPT6H	Transcription elongation factor SPT6	Q7KZ85;Q7KZ85-3;Q7KZ85-2	Q7KZ85	T	1718;718;537	MSIAGDAtPLLDEMD	STPMSIAGDATPLLDEMDR__
0.116498	9151600	0.415909		DDX27	Probable ATP-dependent RNA helicase DDX27	Q3MI07;Q96GQ7	Q3MI07	S	54;54		EDDEVPVEPESDSGDEEEEGP
0.116498	9151600	0.415909		DDX27	Probable ATP-dependent RNA helicase DDX27	Q3MI07;Q96GQ7	Q3MI07	S	56;56		DEVPVEPESDSGDEEEEGPIV
0.116486	485360	0.415959		GEMIN6	Gem-associated protein 6	Q8WXD5	Q8WXD5	S	166	IEGHLTAsQ______	QDLIEGHLTASQ_________
0.11648	410220000	0.415982		SRRM2	Serine/arginine repetitive matrix protein 2	Q9UQ35;Q9UQ35-2;I3L2L6;F5GWZ7	Q9UQ35	S	1112;1112;1112;364	VtELAsRsPIRQDRG	SSPVTELASRSPIRQDRGEFS
0.116437	435840000	0.416155		PRPF38B	Pre-mRNA-splicing factor 38B	Q5VTL8	Q5VTL8	S	491	KsKKREHsPsKEKSR	SVEKSKKREHSPSKEKSRKRS
0.116374	30061000	0.416409		RAD54L2	Helicase ARIP4	E7EU19;H0Y760;Q9Y4B4	E7EU19	S	871;1006;1177	PDsPEIIsELQQYAD	PVSPDSPEIISELQQYADVAA
0.116273	20300000	0.416817		PPP1R3D	Protein phosphatase 1 regulatory subunit 3D	O95685	O95685	S	74	IILRRARsLPssPER	LRPIILRRARSLPSSPERRQK
0.116273	20300000	0.416817		PPP1R3D	Protein phosphatase 1 regulatory subunit 3D	O95685	O95685	S	78	RARsLPssPERRQKA	ILRRARSLPSSPERRQKAAGA
[truncated: 7,996 more rows]
