# Supplementary material for: KIS counteracts PTBP2 and regulates alternative exon usage in neurons
Source: eLife. 2024 Apr 10;13:e96048. doi: 10.7554/eLife.96048 (PMC11045219; doi:10.7554/eLife.96048)
Supplement: Supplementary file 3. [file elife-96048-supp3.xlsx]

## Sheet: PRIMERS
S1 Table
	Primers used for quantitative PCR:
	Target	Type	Sequence 5'-3'
	MmUHMK1	Forward	CAGGAATGAAGCTGAAAC
		Reverse	AGGTCTCTGAGGTGATAG
		Probe	AATTGCGGCATTCACCACTG
	MmGAPDH	Forward	CGTAGACAAAATGGTGAAG
		Reverse	CCATGTAGTTGAGGTCAA
		Probe	TTGATGGCAACAATCTCCACTT
	pFLARE.G	Forward	GAACCGCATCGAGCTGAA
		Reverse	TGCTTGTCGGCCATGATATAG
		Probe	ATCGACTTCAAGGAGGACGGCAAC
	MmPTBP2	Forward	GTTGGTTAGCAATTTAAATGA
		Reverse	AGCACTGTCTTTCTTATTG
		Probe	CCCAAAGTCTGTTTACCCTCTTCG
	Semiquantitative PCR primers:
	Target	Type	Sequence 5'-3'
	CaMKIIβ exons 11-17 (ENSMUST00000019133.11)	Forward	CAGGAGACTGTGGAATGT
		Reverse	GGCATCTTCATCCTCTAT
	Cloning primers:
	Constructs	Type	Sequence5'-3'
	pcDNA3-FLAG-PTBP1	Forward	GAATTCGATATCCATGGACGGCATCGTCCCAG
		Reverse	GAATTCGCGGCCGCCTAGATGGTGGACTTGGAAAAG
	pcDNA3-FLAG-PTBP2	Forward	GAATTCGATATCCATGGACGGAATTGTCACTGAG
		Reverse	GAATTCGCGGCCGCTTAGATTGTTGACTTGGAGAAAG
	pET-28a-6HIS-PTBP2	Forward	GTGTAAGCTTGCGACGGAATTGTCACTGAGG
		Reverse	GTGTGCGGCCGCTTAGATTGTTGACTTGGAGAAAG
	pEGFP-PTBP2	Forward	GATACTAGATCTCATGGACGGAATTGTCACTGAG
		Reverse	AGTATCAAGCTTTTAGATTGTTGACTTGGAGAAAG
	pmScarlet-Matr3	Forward	ACTGCTCGAGCTATGTCCAAGTCATTCCAGCA
		Reverse	ACTGGAATTCTTAAGTTTCCTTCTTCTGCCT
	pmScarlet-hnRNPM	Forward	GGACTCAGATCTCGAGGCGGCAGGGGTCGAAGC
		Reverse	GAAGCTTGAGCTCGATTAAGCATTTCTATCAATTCGAA
	pcDNA3-HA-KIS	Forward	GCGCGGAATTCGGCCATGGCGGGGTCCGGC
		Reverse	GCGCGCTCGAGTTAGGTTACTGATTAAAGCAAGG
	pLKO.3-DsRed shPTBP2	Forward	GCGGATCCATGGACAACACCGAGGACG (dsRed amplification)
		Reverse	GCGGATCCTTAAGATCTGAGTCCGGACTGG
		Forward	GCGGATCCCCCTGGGGAGAGAGGTCG (pLKO.3 shPTBP2 amplification)
		Reverse	GCGGATCCCGCCCGCCCCACGACC
	Point mutations:
	KISK54A	Forward	CGCCCTTGCGCAGTTCCTGCCTCC
		Reverse	GCAGGAAAGAACCGGTGAGCAAAAGG
	PTBP2S178A	Forward	GCCCAGGCTCCAGTACTTAGAATAATTATTGACAATAT
		Reverse	TACTGGAGCCTGGGCTGGAGTCACCGCACTCTC
	PTBP2S178D	Forward	GCCCAGGATCCAGTACTTAGAATAATTATTGACAATATG
		Reverse	TACTGGATCCTGGGCTGGAGTCACCGCACTCTC
	PTBP2S308A	Forward	GCTCCTTTGGCTATTCCAAATGCTG
		Reverse	AATAGCCAAAGGAGCGAGAGCCCCTGGAACAGCTA
	PTBP2S308D	Forward	GATCCTTTGGCTATTCCAAATGCTG
		Reverse	AATAGCCAAAGGATCGAGAGCCCCTGGAACAGCTA
	PTBP2S434A	Forward	GGGAATGCTCCACTGCACCGTTTTAAAAAACCGGG
		Reverse	CAGTGGAGCATTCCCAAAATCTTTTGTTAGCCCTTGA
	PTBP2S434D	Forward	GGGAATGATCCACTGCACCGTTTTAAAAAACCGGG
		Reverse	CAGTGGATCATTCCCAAAATCTTTTGTTAGCCCTTGA

## Sheet: Plasmids
Plasmids used in this study:
pcDNA3-FLAG	Our lab stock
pcDNA3-FLAG-PTBP1	This paper
pcDNA3-FLAG-PTBP2	This paper
pcDNA3-FLAG-PTBP2 (3S/A)	This paper
pcDNA3-FLAG-PTBP2 (3S/D)	This paper
pET-28A	Novagen # 69864-3
pET-28a-6HIS-PTBP2(S178A)	This paper
pET-28a-6HIS-PTBP2(S308A)	This paper
pET-28a-6HIS-PTBP2(S434A)	This paper
pET-28a-6HIS-PTBP2(3S/A)	This paper
pEGFP-C3	Addgene # 6082-1
pEGFP-PTBP2	This paper
pcDNA3-HA	Our lab stock
pcDNA3-HA-KIS	This paper
pcDNA3-HA-KIS K54A	This paper
pmScarlet-C1	Addgene # 85044
pmScarlet-Matr3	This paper
pmScarlet-hnRNPM	This paper
pLKO.3-GFP shSCR	Our lab stock
pLKO.3-GFP shKIS	Our lab stock
pLKO.3-DsRed shPTBP2	This paper
pCMV-dR8.2 dvpr	Addgene # 8455
pCMV-VSV-G	Addgene # 8454
pGEX-GST	Our lab stock
pGEX-GST-KIS	Our lab stock
pGEX-GST-KIS(K54A)	Our lab stock
pFlareG-PSD95 exon 18	Addgene # 90266
