# Supplementary figures and images for: KIS counteracts PTBP2 and regulates alternative exon usage in neurons
Source: eLife journal article supplement (doi:10.7554/elife.96048), 2024-04-10

**C**

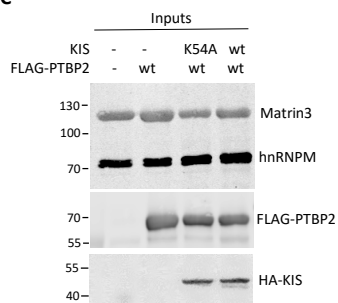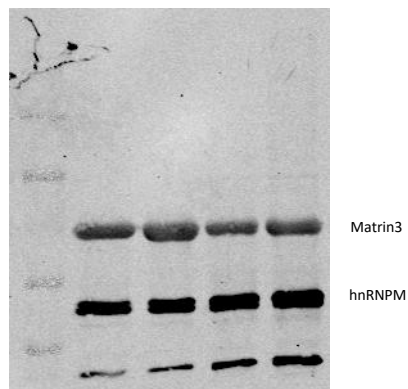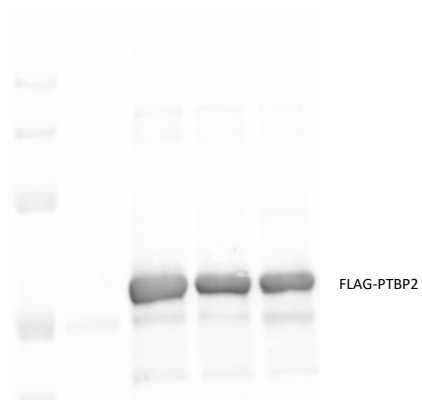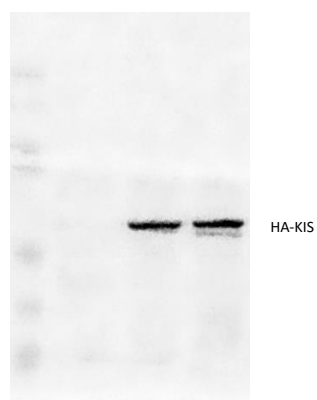

Figure 5-figure supplement 1-source data 2. Representative blot of input samples from Figure 5A

Supplement: supp [file elife-96048-supp-v1.zip]

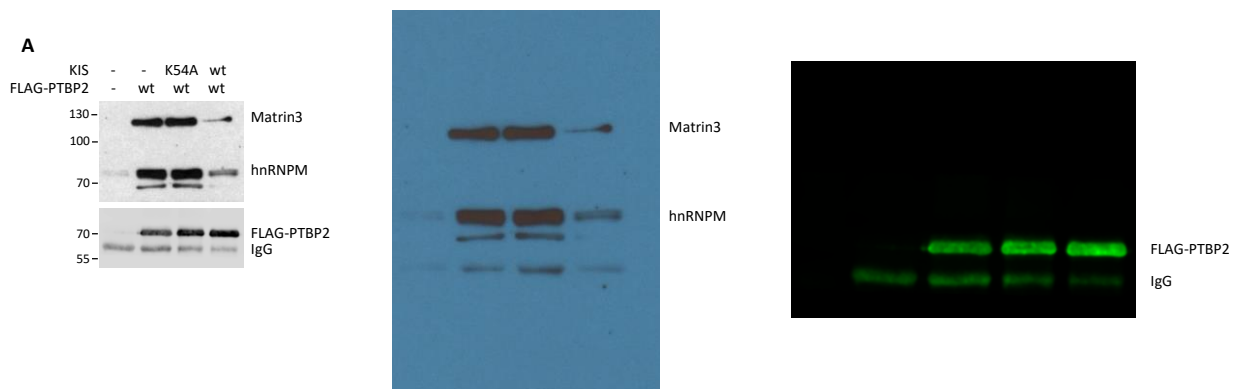

Figure 5-source data 1. hnRNPM and Matrin3 in FLAG-PTBP2 immunoprecipitates *in vivo*

Supplement: supp [file elife-96048-supp-v1.zip]

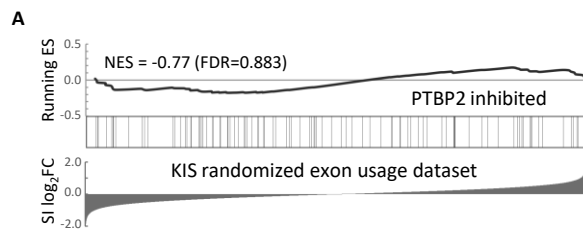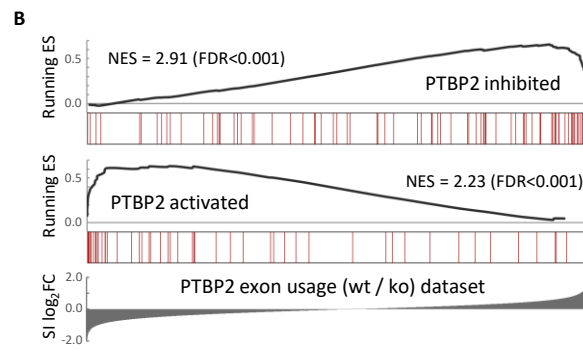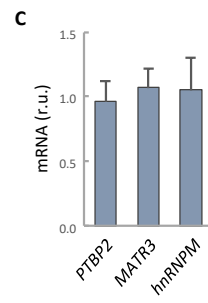

Supplement: supp [file elife-96048-supp-v1.zip]

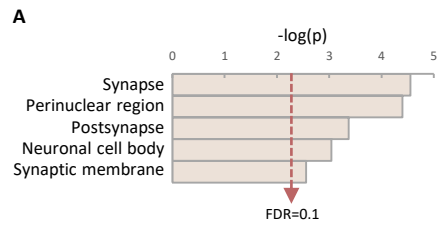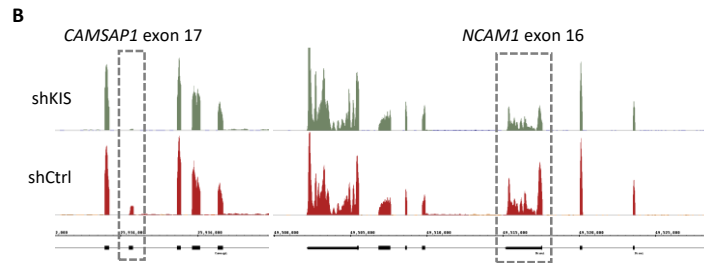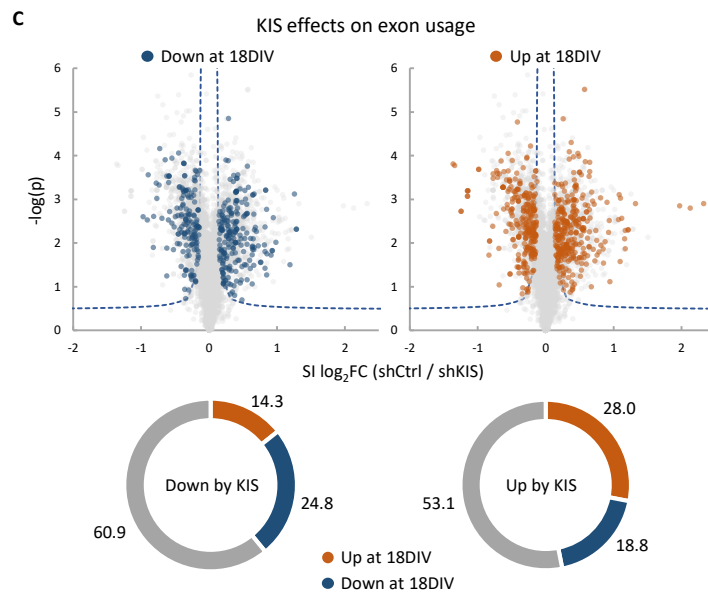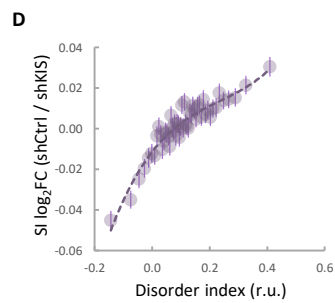

Supplement: supp [file elife-96048-supp-v1.zip]

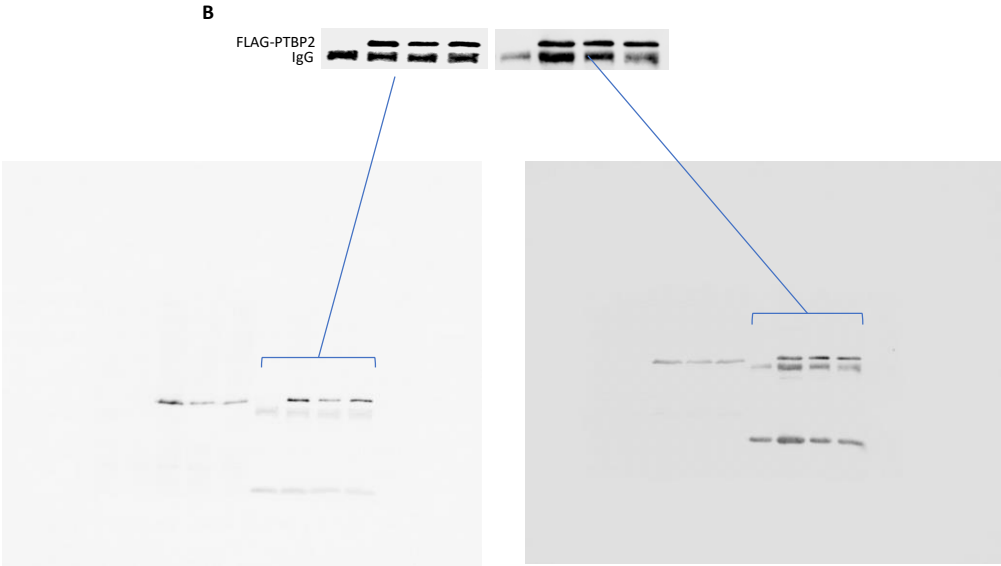

Figure 6-source data 2. FLAG-PTBP2 immunoprecipitated levels for CLIP analysis in Figure 6B

Supplement: supp [file elife-96048-supp-v1.zip]

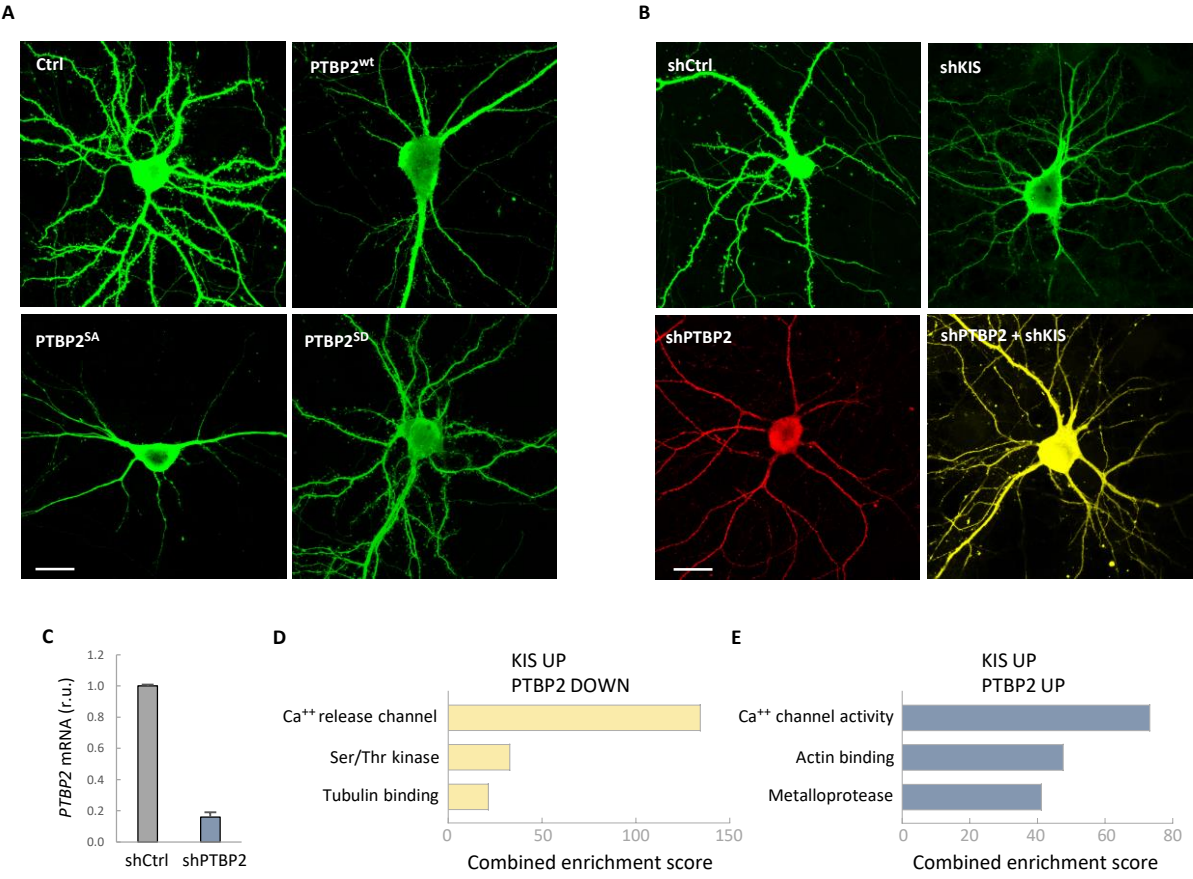

Supplement: supp [file elife-96048-supp-v1.zip]

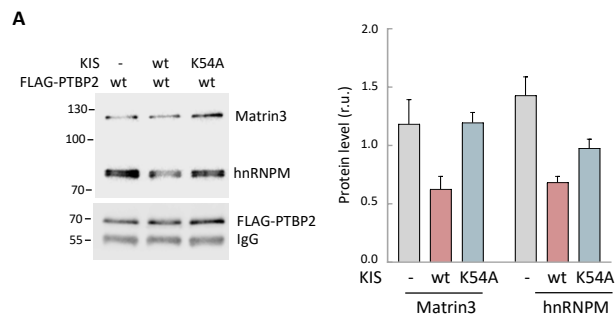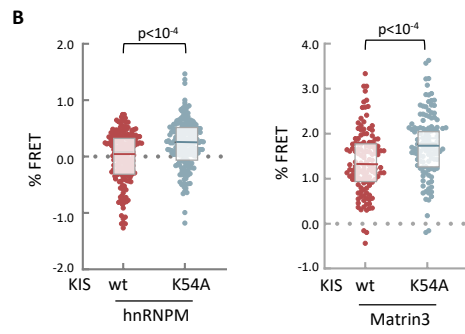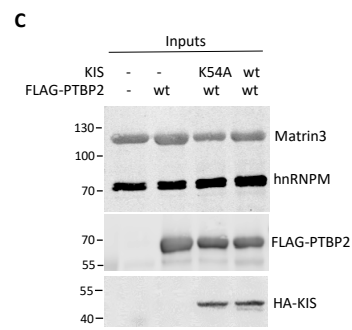

Supplement: supp [file elife-96048-supp-v1.zip]

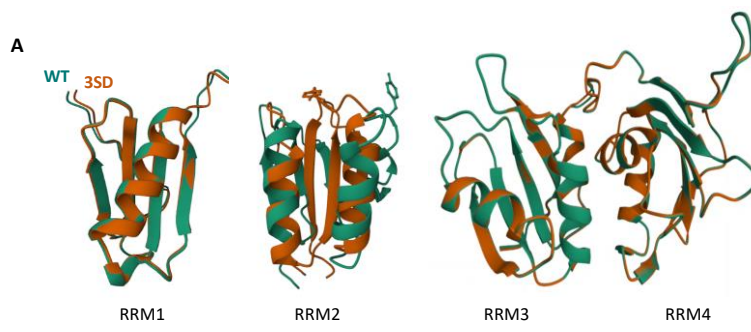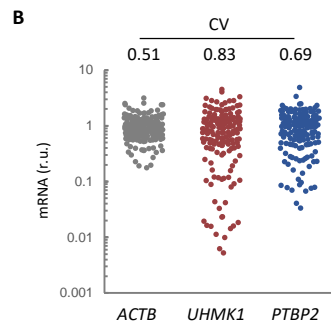

Supplement: supp [file elife-96048-supp-v1.zip]

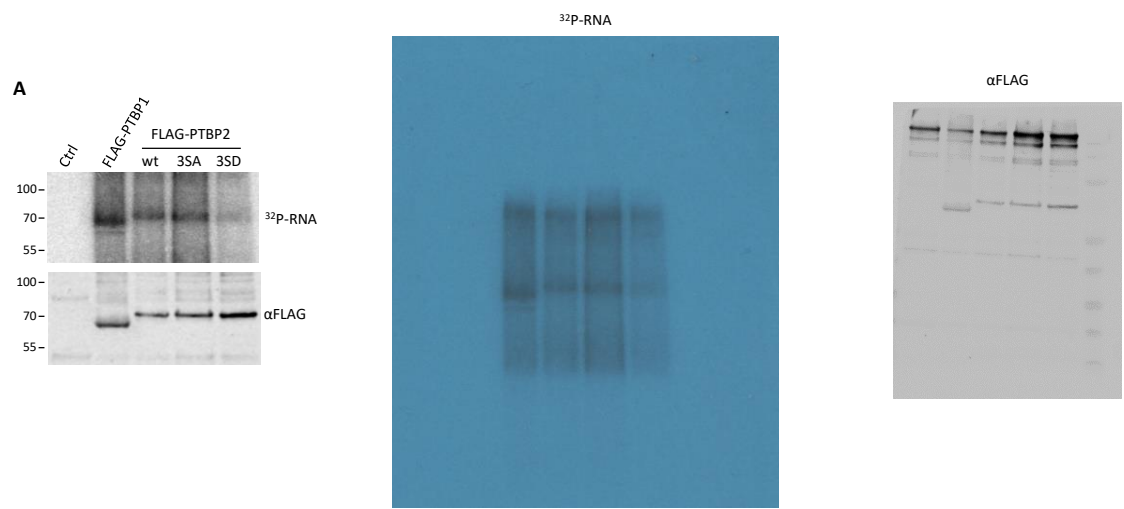

Figure 6-source data 1. PTBP2 RNA binding by CLIP

Supplement: supp [file elife-96048-supp-v1.zip]

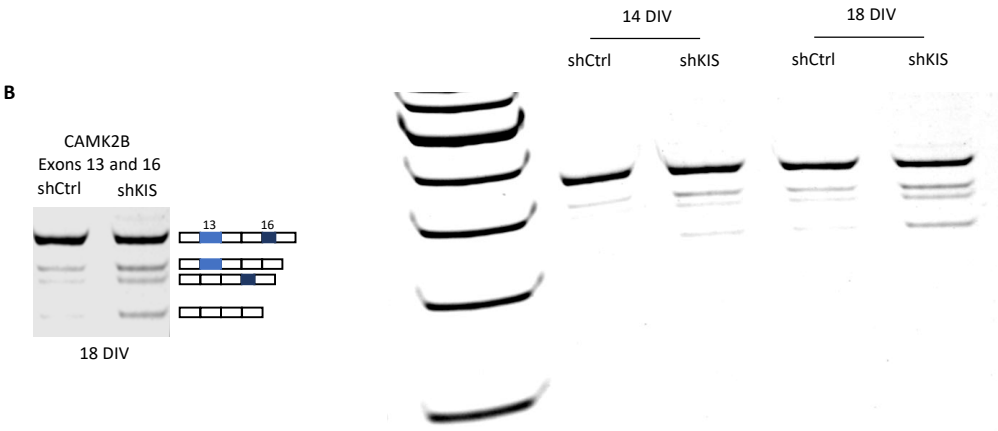

Figure 3-source data 1. CAMK2B exon exclusion analysis

Supplement: supp [file elife-96048-supp-v1.zip]
